# Supplementary material for: Pattern recognition in the nucleation kinetics of non-equilibrium self-assembly
Source: Nature. 2024 Jan 17;625(7995):500–7. doi: 10.1038/s41586-023-06890-z (PMC10794147; doi:10.1038/s41586-023-06890-z)
Supplement: Supplementary file 2 — Source Data Fig. 2 [file 41586_2023_6890_MOESM2_ESM.xlsx]

## Sheet: (a) Tile information
Name	South glue	West glue	North glue	East glue	Sequence
H0	e1	nullT10W	nullT10N	e2	TGGGAATATCT TTTTTTTTTT TTTTTTTTTT TTCATGTTGTT
S1	e3	nullT11W	e1	e4	AACTTCTCGA TTTTTTTTTTT AGATATTCCCA ATCACCCAAA
N2	e5	nullT10W	e3	e6	AGGTTAAGAGA TTTTTTTTTT TCGAGAAGTT TAAAAGGCAAA
S3	e7	nullT11W	e5	e8	TCACATACGT TTTTTTTTTTT TCTCTTAACCT AATCGATCCA
H4	e9	nullT10W	e7	e10	TTAGTATCGGT TTTTTTTTTT ACGTATGTGA TACATGATGGA
N5	e11	nullT11W	e9	e12	ACTGCTTCTT TTTTTTTTTTT ACCGATACTAA AATCGTTCCT
H6	e13	nullT10W	e11	e14	TTGTTCATTGT TTTTTTTTTT AAGAAGCAGT TGGTGAGATTA
H7	nullT10S	nullT11W	e13	e15	TTTTTTTTTT TTTTTTTTTTT ACAATGAACAA TTCTCGACAT
H8	e16	nullT10W	nullT10N	e17	TACGGTATTGA TTTTTTTTTT TTTTTTTTTT AGGAGTTTACT
S9	e18	nullT11W	e16	e19	TAGCATCACA TTTTTTTTTTT TCAATACCGTA ACTAGCACAA
N10	e20	nullT10W	e18	e21	AAGATACGAGA TTTTTTTTTT TGTGATGCTA TTTCATAGGGA
S11	e22	nullT11W	e20	e23	TTTCGCTCTA TTTTTTTTTTT TCTCGTATCTT AAAGAACCCA
H12	e20	nullT10W	e22	e25	AAGATACGAGA TTTTTTTTTT TAGAGCGAAA TGTGATAGACA
S13	e26	nullT11W	e20	e27	AACGTTACCT TTTTTTTTTTT TCTCGTATCTT AGCCTTTCTT
H14	e28	nullT10W	e26	e29	TTTCGGATAGA TTTTTTTTTT AGGTAACGTT TTAGTAGGTGT
S15	nullT10S	nullT11W	e28	e30	TTTTTTTTTT TTTTTTTTTTT TCTATCCGAAA ACTCAACACA
S16	e31	e2	nullT11N	e32	TTACACCGAT AACAACATGAA TTTTTTTTTTT TCACCAAACT
B17	e33	e4	e31	e34	TGCGATATTTT TTTGGGTGAT ATCGGTGTAA AGCTAGTGTTA
N18	e35	e6	e33	e36	TTTTCCCTGA TTTGCCTTTTA AAAATATCGCA TATCAACGCT
H19	e37	e8	e35	e38	AAGGGATTAGT TGGATCGATT TCAGGGAAAA ATTGTTTGACA
S20	e39	e10	e37	e40	AAACTCCGAA TCCATCATGTA ACTAATCCCTT TTGTACCACA
N21	e41	e12	e39	e42	TGGATGATACT AGGAACGATT TTCGGAGTTT TCAAGAAGGTA
N22	e43	e14	e41	e44	TCTTTCACGT TAATCTCACCA AGTATCATCCA AAAACGCAAT
H23	nullT11S	e15	e43	e45	TTTTTTTTTTT ATGTCGAGAA ACGTGAAAGA TGAGGTATGAT
S24	e46	e17	nullT11N	e47	ACAGCCATTA AGTAAACTCCT TTTTTTTTTTT TTCAACTCGT
B25	e48	e19	e46	e49	TGCAGTTTTTA TTGTGCTAGT TAATGGCTGT ATTAGTGGGTA
N26	e50	e21	e48	e51	TTCATCGCTA TCCCTATGAAA TAAAAACTGCA AGTCAAACCT
H27	e52	e23	e50	e53	TGGCAAAATAA TGGGTTCTTT TAGCGATGAA AGTATTACGGA
B28	e54	e25	e52	e55	ACTTGTTCCT TGTCTATCACA TTATTTTGCCA ACCACTTCTT
H29	e56	e27	e54	e57	AGTAGTGAAGT AAGAAAGGCT AGGAACAAGT ATAGACAGGAA
S30	e58	e29	e56	e59	TTCTACGCAT ACACCTACTAA ACTTCACTACT ATCACCACAA
H31	nullT11S	e30	e58	e60	TTTTTTTTTTT TGTGTTGAGT ATGCGTAGAA TAGGAAGACAA
B32	e61	e32	nullT10N	e62	TTGAGGGATAT AGTTTGGTGA TTTTTTTTTT TCGAGAGATAA
S33	e63	e34	e61	e64	TTCGTACACA TAACACTAGCT ATATCCCTCAA TGCTCATCAT
B34	e65	e36	e63	e66	TGGCTATTAGA AGCGTTGATA TGTGTACGAA ACGGAAATTTT
S35	e67	e38	e65	e68	ACCTCACATT TGTCAAACAAT TCTAATAGCCA ACCCATTTCA
H36	e69	e40	e67	e70	ATGGGATTAGA TGTGGTACAA AATGTGAGGT TTTTTAAGCGT
S37	e71	e42	e69	e72	ACCCTTCAAT TACCTTCTTGA TCTAATCCCAT AATCACCAGT
B38	e73	e44	e71	e74	AGTAGACTGAA ATTGCGTTTT ATTGAAGGGT TAATACGAGGA
S39	nullT10S	e45	e73	e75	TTTTTTTTTT ATCATACCTCA TTCAGTCTACT TATGCACTCA
H40	e76	e47	nullT10N	e62	TGAGGACTATT ACGAGTTGAA TTTTTTTTTT TCGAGAGATAA
S41	e78	e49	e76	e79	TGCATATCCA TACCCACTAAT AATAGTCCTCA TTAGCAACCA
H42	e48	e51	e78	e81	TGCAGTTTTTA AGGTTTGACT TGGATATGCA AAAATTAGCGT
S43	e82	e53	e48	e83	TTGACACCAT TCCGTAATACT TAAAAACTGCA TTACCCAACA
H44	e84	e55	e82	e85	AAGTTAGGGTA AAGAAGTGGT ATGGTGTCAA TGGTATTCAGA
S45	e86	e57	e84	e87	ACCCTTCTTT TTCCTGTCTAT TACCCTAACTT ATTGCCACTA
N46	e88	e59	e86	e89	AGGGATGTAAT TTGTGGTGAT AAAGAAGGGT ATATGGTAGCT
S47	nullT10S	e60	e88	e90	TTTTTTTTTT TTGTCTTCCTA ATTACATCCCT ATTCACCGTA
S48	e91	e62	nullT11N	e92	ATGTCCACTT TTATCTCTCGA TTTTTTTTTTT TCGATCCAAT
B49	e93	e64	e91	e94	AATAGGGTACA ATGATGAGCA AAGTGGACAT AGGATATAGCA
S50	e95	e66	e93	e96	ATTGACCCTT AAAATTTCCGT TGTACCCTATT ATTACAGCCA
H51	e97	e68	e95	e98	TGGTAGTAACT TGAAATGGGT AAGGGTCAAT ATAGAGTTGGA
S52	e99	e70	e97	e100	AACTTCAGCT ACGCTTAAAAA AGTTACTACCA ATCACGCTTA
H53	e101	e72	e99	e102	TGGAAGAGTAT ACTGGTGATT AGCTGAAGTT AAATTGGAACA
S54	e103	e74	e101	e104	AAACCAGTCT TCCTCGTATTA ATACTCTTCCA ATTACTGCCA
H55	nullT11S	e75	e103	e105	TTTTTTTTTTT TGAGTGCATA AGACTGGTTT ATTTTTGACGT
S56	e106	e62	nullT11N	e107	TTACCGACAT TTATCTCTCGA TTTTTTTTTTT ATCCATCGAA
H57	e108	e79	e106	e109	AGAATTAGGGA TGGTTGCTAA ATGTCGGTAA TAGAGAATCGA
S58	e110	e81	e108	e111	ACTGAACCTT ACGCTAATTTT TCCCTAATTCT ACTCGTAACA
H59	e112	e83	e110	e113	ATCTTGGAGTA TGTTGGGTAA AAGGTTCAGT TTTTGGTTCAA
B60	e114	e85	e112	e115	AGCCTACAAA TCTGAATACCA TACTCCAAGAT AATCCTTGCT
B61	e116	e87	e114	e117	ACAAGGATAGA TAGTGGCAAT TTTGTAGGCT TAGGGTAACAT
N62	e118	e89	e116	e119	AAGTCACCAA AGCTACCATAT TCTATCCTTGT TTCTTCACGT
H63	nullT11S	e90	e118	e120	TTTTTTTTTTT TACGGTGAAT TTGGTGACTT ATGCAAAGATT
H64	e121	e92	nullT10N	e122	AAGTACTGAGA ATTGGATCGA TTTTTTTTTT AGTAGGAAGAA
S65	e123	e94	e121	e124	ACTGCCATAA TGCTATATCCT TCTCAGTACTT ATGCATACCA
H66	e125	e96	e123	e126	TTATCTGTGGA TGGCTGTAAT TTATGGCAGT AGACTTAGGAA
S67	e127	e98	e125	e128	TACGTTCCAA TCCAACTCTAT TCCACAGATAA ACATCTGCTT
H68	e129	e100	e127	e130	ATACTGGATGA TAAGCGTGAT TTGGAACGTA AATAGTCTGGT
S69	e131	e102	e129	e27	AACCTCGAAA TGTTCCAATTT TCATCCAGTAT AGCCTTTCTT
H70	e133	e104	e131	e34	TGTTTGAACTT TGGCAGTAAT TTTCGAGGTT AGCTAGTGTTA
B71	nullT10S	e105	e133	e135	TTTTTTTTTT ACGTCAAAAAT AAGTTCAAACA ATCTTCTGCA
H72	e136	e107	nullT10N	e137	AGAACTAAGGA TTCGATGGAT TTTTTTTTTT AACTATGAGGA
S73	e138	e109	e136	e139	TAGCCAACAA TCGATTCTCTA TCCTTAGTTCT TCGACTTCTT
H74	e140	e111	e138	e141	ACGAGATAGAA TGTTACGAGT TTGTTGGCTA AATGTGGAAAA
N75	e142	e113	e140	e143	AACGTCTTCT TTGAACCAAAA TTCTATCTCGT TCCAATCCAA
H76	e144	e115	e142	e145	AGTGATTAGGA AGCAAGGATT AGAAGACGTT AGGTTCTAGTT
S77	e146	e117	e144	e147	AGCTTCATCA ATGTTACCCTA TCCTAATCACT ATGCACTACT
H78	e148	e119	e146	e149	TGGACAAATTT ACGTGAAGAA TGATGAAGCT ATGGGATCATA
B79	nullT10S	e120	e148	e150	TTTTTTTTTT AATCTTTGCAT AAATTTGTCCA TAACACCCAA
S80	e151	e122	nullT11N	e152	ACATCCATGA TTCTTCCTACT TTTTTTTTTTT ATTCACCCTT
H81	e153	e124	e151	e154	TAGAGGAAAGT TGGTATGCAT TCATGGATGT AGAACTATGGT
S82	e155	e126	e153	e156	AACCCTCTTT TTCCTAAGTCT ACTTTCCTCTA ACTAACGACA
H83	e157	e128	e155	e158	ACAGTAGGATT AAGCAGATGT AAAGAGGGTT ATTATCAGGGT
N84	e159	e130	e157	e160	AATCACAGCT ACCAGACTATT AATCCTACTGT TCCGATCAAA
N85	e161	e27	e159	e130	AGGGTTCTAAT AAGAAAGGCT AGCTGTGATT AATAGTCTGGT
S86	e163	e34	e161	e160	TTCGCATCTA TAACACTAGCT ATTAGAACCCT TCCGATCAAA
B87	nullT11S	e135	e163	e165	TTTTTTTTTTT TGCAGAAGAT TAGATGCGAA AGTGAACAAAA
S88	e166	e137	nullT11N	e167	ACACAGAACA TCCTCATAGTT TTTTTTTTTTT TCATAGCCAA
H89	e168	e139	e166	e169	AGAGTTTAGGA AAGAAGTCGA TGTTCTGTGT AGATCAGTGTA
S90	e146	e141	e168	e171	AGCTTCATCA TTTTCCACATT TCCTAAACTCT TAGCAAACCA
B91	e172	e143	e146	e173	TGGAGATACAT TTGGATTGGA TGATGAAGCT TCTAAGTGTGA
S92	e174	e145	e172	e4	AAACCCAGAT AACTAGAACCT ATGTATCTCCA ATCACCCAAA
H93	e176	e147	e174	e177	TATCGGAAGTA AGTAGTGCAT ATCTGGGTTT AGCAAAAGAAA
N94	e178	e149	e176	e179	TGCTCCATTA TATGATCCCAT TACTTCCGATA AAACCTCCTT
N95	nullT11S	e150	e178	e180	TTTTTTTTTTT TTGGGTGTTA TAATGGAGCA ACTTTAGAGGT
H96	e181	e152	nullT10N	e182	AGCTTAGATGA AAGGGTGAAT TTTTTTTTTT AGAGCTATGAT
B97	e183	e154	e181	e184	TCTTGCTTCT ACCATAGTTCT TCATCTAAGCT TTCTGACCAA
H98	e185	e156	e183	e186	TTAGGATGACA TGTCGTTAGT AGAAGCAAGA TGGAGTAAGAT
B99	e187	e158	e185	e188	TTCCCAAAGA ACCCTGATAAT TGTCATCCTAA ATCGAACCTT
B100	e189	e160	e187	e190	AGTTGATAGGT TTTGATCGGA TCTTTGGGAA TTTAAATGCGA
B101	e191	e130	e189	e192	TTTACACCGA ACCAGACTATT ACCTATCAACT TTCGACACTT
H102	e193	e160	e191	e194	TATATGGTCGT TTTGATCGGA TCGGTGTAAA AGAGTTAGGAA
B103	e195	e165	e193	e196	TGACAACCAT TTTTGTTCACT ACGACCATATA TCATTGCCTA
H104	e197	nullT10W	e195	e198	AGATGTGATCT TTTTTTTTTT ATGGTTGTCA ATGATTGCAAT
S105	e67	nullT11W	e197	e200	ACCTCACATT TTTTTTTTTTT AGATCACATCT AACTCCGATT
H106	e5	nullT10W	e67	e202	AGGTTAAGAGA TTTTTTTTTT AATGTGAGGT AATTTTTCGGT
N107	e203	nullT11W	e5	e204	ACCAGCAATA TTTTTTTTTTT TCTCTTAACCT ACACCATCAT
H108	e28	nullT10W	e203	e206	TTTCGGATAGA TTTTTTTTTT TATTGCTGGT AAAAGTTGTGT
S109	e207	nullT11W	e28	e196	TTTCCCTTGA TTTTTTTTTTT TCTATCCGAAA TCATTGCCTA
H110	e209	nullT10W	e207	e210	AGTTTGTTTGT TTTTTTTTTT TCAAGGGAAA TATATGACGGA
S111	e211	nullT11W	e209	e59	AAACTTCCCA TTTTTTTTTTT ACAAACAAACT ATCACCACAA
H112	e213	e167	e211	e214	TTCTATGTGGA TTGGCTATGA TGGGAAGTTT AGATTATCGGA
S113	e215	e169	e213	e216	ATCCACCATT TACACTGATCT TCCACATAGAA TCATTGCTCT
H114	e217	e171	e215	e218	TCGTTTAGAGA TGGTTTGCTA AATGGTGGAT TCTTAGAAGGT
N115	e155	e173	e217	e220	AACCCTCTTT TCACACTTAGA TCTCTAAACGA ACTGTCACAT
N116	e136	e4	e155	e222	AGAACTAAGGA TTTGGGTGAT AAAGAGGGTT AAAGAGAGGAA
S117	e223	e177	e136	e224	ATATGCACCA TTTCTTTTGCT TCCTTAGTTCT ATGACCCAAT
H118	e225	e179	e223	e226	AAGTCGAGTAT AAGGAGGTTT TGGTGCATAT AGAGTAGTGTT
B119	nullT10S	e180	e225	e227	TTTTTTTTTT ACCTCTAAAGT ATACTCGACTT TGAACCAACT
S120	e110	e182	nullT11N	e229	ACTGAACCTT ATCATAGCTCT TTTTTTTTTTT TCTACCTCCT
N121	e172	e184	e110	e231	TGGAGATACAT TTGGTCAGAA AAGGTTCAGT TAAGAAGGTCA
B122	e232	e186	e172	e87	ACTCGCAATA ATCTTACTCCA ATGTATCTCCA ATTGCCACTA
H123	e234	e188	e232	e235	AGAACAGAGTA AAGGTTCGAT TATTGCGAGT TCTGGGATTAT
S124	e236	e190	e234	e237	TTGACATCCA TCGCATTTAAA TACTCTGTTCT ACTTGCCTAA
H125	e238	e192	e236	e239	TTGAGAGTAGT AAGTGTCGAA TGGATGTCAA ACAATGGAAAA
S126	e240	e194	e238	e241	TCGATTCCTT TTCCTAACTCT ACTACTCTCAA ACTGCTACAT
H127	e41	e196	e240	e243	TGGATGATACT TAGGCAATGA AAGGAATCGA TTCGGTATAGA
S128	e244	e198	e41	e87	ACGTCCATAA ATTGCAATCAT AGTATCATCCA ATTGCCACTA
H129	e246	e200	e244	e194	TGTTGTTGATT AATCGGAGTT TTATGGACGT AGAGTTAGGAA
S130	e248	e202	e246	e64	AATCCGAACT ACCGAAAAATT AATCAACAACA TGCTCATCAT
N131	e250	e204	e248	e251	ACTGAGGATAA ATGATGGTGT AGTTCGGATT TAATAGTCGGA
S132	e187	e206	e250	e253	TTCCCAAAGA ACACAACTTTT TTATCCTCAGT TCAAGAACCA
B133	e112	e196	e187	e255	ATCTTGGAGTA TAGGCAATGA TCTTTGGGAA TATAGACGTGT
N134	e256	e210	e112	e257	ACCTGACATT TCCGTCATATA TACTCCAAGAT AGAAACACCT
B135	e258	e59	e256	e259	AACGTGAAATT TTGTGGTGAT AATGTCAGGT ATGTAGTAGCA
S136	e260	e214	e258	e237	AATCAGCCTT TCCGATAATCT AATTTCACGTT ACTTGCCTAA
H137	e262	e216	e260	e263	TAGTCAGTTGA AGAGCAATGA AAGGCTGATT TTAGTTCAGGA
S138	e110	e218	e262	e265	ACTGAACCTT ACCTTCTAAGA TCAACTGACTA TTTCCGTCTT
H139	e266	e220	e110	e267	TGTAGATGAGT ATGTGACAGT AAGGTTCAGT TAGGGATGAAA
N140	e268	e222	e266	e269	ATCGTAACCA TTCCTCTCTTT ACTCATCTACA ATCTCAGCAT
N141	e270	e224	e268	e271	AGGAAGGAATA ATTGGGTCAT TGGTTACGAT TGAAGTAAGGA
S142	e272	e226	e270	e273	TCTTTCACGA AACACTACTCT TATTCCTTCCT AGCTCTCATT
H143	nullT11S	e227	e272	e274	TTTTTTTTTTT AGTTGGTTCA TCGTGAAAGA ATTGAAGCAAA
H144	e275	e229	nullT10N	e276	AGAGATGACTT AGGAGGTAGA TTTTTTTTTT TAGTTAGTCGT
S145	e277	e231	e275	e265	TCACCCATTT TGACCTTCTTA AAGTCATCTCT TTTCCGTCTT
H146	e279	e87	e277	e280	ACTTGTAGGAT TAGTGGCAAT AAATGGGTGA AGGAAAGACTA
S147	e281	e235	e279	e282	TAACTGCACA ATAATCCCAGA ATCCTACAAGT TCACAACGTA
H148	e283	e237	e281	e102	ATGTGAGTAGT TTAGGCAAGT TGTGCAGTTA AAATTGGAACA
S149	e285	e239	e283	e286	ATATCGCACA TTTTCCATTGT ACTACTCACAT AATCTCGACA
H150	e287	e241	e285	e288	TGTATGAAGGA ATGTAGCAGT TGTGCGATAT AAAGGCTAGTA
N151	e289	e243	e287	e290	ACACACAAGA TCTATACCGAA TCCTTCATACA AGTTCACACA
N152	e168	e87	e289	e109	AGAGTTTAGGA TAGTGGCAAT TCTTGTGTGT TAGAGAATCGA
S153	e293	e194	e168	e294	TGTACCCAAA TTCCTAACTCT TCCTAAACTCT TCATGCCTTA
H154	e295	e64	e293	e296	ATGTAGGACTT ATGATGAGCA TTTGGGTACA TGGAGACTAAT
N155	e297	e251	e295	e298	ACATGTCACA TCCGACTATTA AAGTCCTACAT TCATCACCAT
H156	e299	e253	e297	e251	ATGGATGTCTA TGGTTCTTGA TGTGACATGT TAATAGTCGGA
S157	e301	e255	e299	e302	TTCCAACAGA ACACGTCTATA TAGACATCCAT TTCAACCCAT
H158	e303	e257	e301	e304	ATGTAGGGTAA AGGTGTTTCT TCTGTTGGAA AAGAGAGTGTA
S159	e86	e259	e303	e306	ACCCTTCTTT TGCTACTACAT TTACCCTACAT ACCATCCAAA
H160	e307	e237	e86	e308	TAGAAGGCATA TTAGGCAAGT AAAGAAGGGT AGCAAAGAAAT
S161	e309	e263	e307	e310	TTCGCTCTAA TCCTGAACTAA TATGCCTTCTA AGCACTTACA
H162	e311	e265	e309	e49	TGGATAGCTTA AAGACGGAAA TTAGAGCGAA ATTAGTGGGTA
B163	e313	e267	e311	e314	ACGATCATCA TTTCATCCCTA TAAGCTATCCA TTCCTGACAA
H164	e315	e269	e313	e316	AGGTATCGTAT ATGCTGAGAT TGATGATCGT AAAATGCAAGA
N165	e313	e271	e315	e318	ACGATCATCA TCCTTACTTCA ATACGATACCT TCAAGACACA
S166	e319	e273	e313	e320	TAAAATTGGCA AATGAGAGCT TGATGATCGT AATGTCTAGGA
S167	nullT10S	e274	e319	e321	TTTTTTTTTT TTTGCTTCAAT TGCCAATTTTA TCAATCAGCT
B168	e142	e276	nullT11N	e323	AACGTCTTCT ACGACTAACTA TTTTTTTTTTT TCACCGTTAT
N169	e324	e265	e142	e325	TTAGGTAGCAT AAGACGGAAA AGAAGACGTT ATAGTGAGGAA
N170	e326	e280	e324	e327	ACAACTTCGA TAGTCTTTCCT ATGCTACCTAA TTACCACCAA
H171	e328	e282	e326	e329	AATGCAGATTT TACGTTGTGA TCGAAGTTGT TTTCATTTGGT
S172	e330	e102	e328	e331	ACACTCCAAA TGTTCCAATTT AAATCTGCATT ATTGTCCCTT
H173	e332	e286	e330	e180	TTTTGATTCGT TGTCGAGATT TTTGGAGTGT ACTTTAGAGGT
S174	e334	e288	e332	e335	ACCATAACGA TACTAGCCTTT ACGAATCAAAA AGCATCAACT
H175	e315	e290	e334	e42	AGGTATCGTAT TGTGTGAACT TCGTTATGGT TCAAGAAGGTA
S176	e54	e109	e315	e339	ACTTGTTCCT TCGATTCTCTA ATACGATACCT AAATCCTGCT
B177	e324	e294	e54	e341	TTAGGTAGCAT TAAGGCATGA AGGAACAAGT AGGTTAGACAT
S178	e342	e296	e324	e343	AAACCTGCTA ATTAGTCTCCA ATGCTACCTAA ATTACGCTCT
B179	e344	e298	e342	e345	TAGGAACAGAA ATGGTGATGA TAGCAGGTTT ACAGGAAGATA
S180	e159	e251	e344	e347	AATCACAGCT TCCGACTATTA TTCTGTTCCTA AGCCTCATTT
H181	e348	e302	e159	e320	TGGTAAGTACT ATGGGTTGAA AGCTGTGATT AATGTCTAGGA
S182	e127	e304	e348	e351	TACGTTCCAA TACACTCTCTT AGTACTTACCA TCGACTTTCA
N183	e352	e306	e127	e177	AGAAGTCAGAT TTTGGATGGT TTGGAACGTA AGCAAAAGAAA
N184	e354	e308	e352	e273	ATACACACGT ATTTCTTTGCT ATCTGACTTCT AGCTCTCATT
H185	e356	e310	e354	e357	ATGGTTTTGTT TGTAAGTGCT ACGTGTGTAT TGAAAGAGGTA
S186	e358	e49	e356	e359	ACGTATCACA TACCCACTAAT AACAAAACCAT ACCAAGCTAA
H187	e61	e314	e358	e89	TTGAGGGATAT TTGTCAGGAA TGTGATACGT ATATGGTAGCT
S188	e289	e316	e61	e363	ACACACAAGA TCTTGCATTTT ATATCCCTCAA TTAACAGCCA
N189	e364	e318	e289	e365	AGGAGTAAACT TGTGTCTTGA TCTTGTGTGT AGTTGGTAGTA
B190	e131	e320	e364	e59	AACCTCGAAA TCCTAGACATT AGTTTACTCCT ATCACCACAA
H191	nullT11S	e321	e131	e368	TTTTTTTTTTT AGCTGATTGA TTTCGAGGTT AGAATCAGGAT
N192	e250	e323	nullT10N	e370	ACTGAGGATAA ATAACGGTGA TTTTTTTTTT AAAAGTGAACA
N193	e371	e325	e250	e27	AGCCATCTTT TTCCTCACTAT TTATCCTCAGT AGCCTTTCTT
N194	e157	e327	e371	e374	ACAGTAGGATT TTGGTGGTAA AAAGATGGCT TGTAGGAATCT
S195	e375	e329	e157	e376	AACACCTCAT ACCAAATGAAA AATCCTACTGT TGCCATATCA
H196	e136	e331	e375	e378	AGAACTAAGGA AAGGGACAAT ATGAGGTGTT TATGACTGTGA
S197	e3	e180	e136	e380	AACTTCTCGA ACCTCTAAAGT TCCTTAGTTCT AAGACCAACA
H198	e381	e335	e3	e357	AGGAGTTACTT AGTTGATGCT TCGAGAAGTT TGAAAGAGGTA
S199	e383	e42	e381	e143	TCGCTTTCTA TACCTTCTTGA AAGTAACTCCT TCCAATCCAA
H200	e385	e339	e383	e386	TATGGAGTTCT AGCAGGATTT TAGAAAGCGA AGAAGTAGACA
B201	e387	e341	e385	e388	TCCACGTTAT ATGTCTAACCT AGAACTCCATA AACCAGAACT
H202	e389	e343	e387	e390	AGGGATTTAGT AGAGCGTAAT ATAACGTGGA AAAGCATTGAT
S203	e391	e345	e389	e310	ACGAACCATA TATCTTCCTGT ACTAAATCCCT AGCACTTACA
H204	e393	e347	e391	e394	TAACTGGAAGA AAATGAGGCT TATGGTTCGT AAAAATGGACA
N205	e151	e320	e393	e396	ACATCCATGA TCCTAGACATT TCTTCCAGTTA ATTCACTCGA
N206	e93	e351	e151	e398	AATAGGGTACA TGAAAGTCGA TCATGGATGT TTCTGTAGTGA
N207	e399	e177	e93	e400	AAAAAACGCA TTTCTTTTGCT TGTACCCTATT TTCCTTCACA
H208	e401	e273	e399	e38	AGTAATCTGGT AATGAGAGCT TGCGTTTTTT ATTGTTTGACA
N209	e403	e357	e401	e404	ATCACGACTT TACCTCTTTCA ACCAGATTACT TTGCACCTTA
H210	e405	e359	e403	e406	TCGAGAGATTA TTAGCTTGGT AAGTCGTGAT TTTACTGGGTA
N211	e248	e89	e405	e408	AATCCGAACT AGCTACCATAT TAATCTCTCGA TTCTGCTCAA
H212	e213	e363	e248	e410	TTCTATGTGGA TGGCTGTTAA AGTTCGGATT TTATGTTTGCA
S213	e411	e365	e213	e412	ATTGCCTACA TACTACCAACT TCCACATAGAA TCGTCTTCAT
H214	e270	e59	e411	e414	AGGAAGGAATA TTGTGGTGAT TGTAGGCAAT TGATTAGGAGT
S215	nullT10S	e368	e270	e415	TTTTTTTTTT ATCCTGATTCT TATTCCTTCCT AACGTCATCT
S216	e416	e370	nullT11N	e417	TTGTTCCCTT TGTTCACTTTT TTTTTTTTTTT ATCTTCCGAA
H217	e418	e27	e416	e419	TAAATGGGAGA AAGAAAGGCT AAGGGAACAA AGATCTGAGTT
N218	e420	e374	e418	e237	ATCTGCTTCA AGATTCCTACA TCTCCCATTTA ACTTGCCTAA
H219	e422	e376	e420	e423	TTGGTTTGAAT TGATATGGCA TGAAGCAGAT ATAGCAGGATA
N220	e39	e378	e422	e425	AAACTCCGAA TCACAGTCATA ATTCAAACCAA ACATCGCTAA
H221	e332	e380	e39	e427	TTTTGATTCGT TGTTGGTCTT TTCGGAGTTT ATATAGAGGCA
S222	e428	e357	e332	e429	TTTCGTCTCA TACCTCTTTCA ACGAATCAAAA TAAGCCACAA
H223	e430	e143	e428	e431	ACTATGTGAGT TTGGATTGGA TGAGACGAAA ATTACGAGAGA
S224	e371	e386	e430	e433	AGCCATCTTT TGTCTACTTCT ACTCACATAGT TAACACAGCA
H225	e434	e388	e371	e320	TAGCATGAGTA AGTTCTGGTT AAAGATGGCT AATGTCTAGGA
S226	e436	e390	e434	e224	ACACGACTAA ATCAATGCTTT TACTCATGCTA ATGACCCAAT
H227	e438	e310	e436	e70	TAGTGGTTGTA TGTAAGTGCT TTAGTCGTGT TTTTTAAGCGT
S228	e440	e394	e438	e441	TTTACTGCCT TGTCCATTTTT TACAACCACTA ACATACACGT
N229	e84	e396	e440	e316	AAGTTAGGGTA TCGAGTGAAT AGGCAGTAAA AAAATGCAAGA
B230	e301	e398	e84	e445	TTCCAACAGA TCACTACAGAA TACCCTAACTT ACGTTAACCT
H231	e319	e400	e301	e447	TAAAATTGGCA TGTGAAGGAA TCTGTTGGAA TACATGGAAGA
S232	e114	e38	e319	e449	AGCCTACAAA TGTCAAACAAT TGCCAATTTTA ACCAAACAGA
N233	e450	e404	e114	e451	AGAGAATGAGT TAAGGTGCAA TTTGTAGGCT TAGTTGTGAGA
S234	e187	e406	e450	e12	TTCCCAAAGA TACCCAGTAAA ACTCATTCTCT AATCGTTCCT
B235	e454	e408	e187	e231	AGTGTTTTGAA TTGAGCAGAA TCTTTGGGAA TAAGAAGGTCA
N236	e268	e410	e454	e457	ATCGTAACCA TGCAAACATAA TTCAAAACACT ACATAACCGA
H237	e458	e412	e268	e451	TAGCTAATGGA ATGAAGACGA TGGTTACGAT TAGTTGTGAGA
N238	e460	e414	e458	e143	TACCGTCATT ACTCCTAATCA TCCATTAGCTA TCCAATCCAA
B239	nullT11S	e415	e460	e462	TTTTTTTTTTT AGATGACGTT AATGACGGTA AGAGTTATGGA
H240	e463	e417	nullT10N	e464	AGAGTGATGAT TTCGGAAGAT TTTTTTTTTT TTGTTGCATAA
S241	e54	e419	e463	e466	ACTTGTTCCT AACTCAGATCT ATCATCACTCT ATCGACCTTT
N242	e467	e237	e54	e271	TGAGTATCTGT TTAGGCAAGT AGGAACAAGT TGAAGTAAGGA
S243	e223	e423	e467	e396	ATATGCACCA TATCCTGCTAT ACAGATACTCA ATTCACTCGA
N244	e161	e425	e223	e117	AGGGTTCTAAT TTAGCGATGT TGGTGCATAT TAGGGTAACAT
S245	e473	e427	e161	e457	ACAACTCACT TGCCTCTATAT ATTAGAACCCT ACATAACCGA
H246	e475	e429	e473	e476	AGTCGATGATA TTGTGGCTTA AGTGAGTTGT ATGAGTTAGGT
S247	e46	e431	e475	e478	ACAGCCATTA TCTCTCGTAAT TATCATCGACT AATCTCCGAA
H248	e479	e433	e46	e480	ATGGATTAGGA TGCTGTGTTA TAATGGCTGT ACAATTGGAAA
S249	e481	e320	e479	e204	TCAGCATCTT TCCTAGACATT TCCTAATCCAT ACACCATCAT
B250	e483	e224	e481	e186	TTTTGTTCAGT ATTGGGTCAT AAGATGCTGA TGGAGTAAGAT
N251	e485	e70	e483	e486	AATTCCCAGT ACGCTTAAAAA ACTGAACAAAA ATAACGCTCT
H252	e487	e441	e485	e74	TTGGGATATCT ACGTGTATGT ACTGGGAATT TAATACGAGGA
N253	e489	e316	e487	e490	ATACTGCCAA TCTTGCATTTT AGATATCCCAA TCTTGTCACA
H254	e41	e445	e489	e255	TGGATGATACT AGGTTAACGT TTGGCAGTAT TATAGACGTGT
N255	e493	e447	e41	e494	ACTTTCTCGT TCTTCCATGTA AGTATCATCCA ATCGCTACAA
H256	e311	e449	e493	e496	TGGATAGCTTA TCTGTTTGGT ACGAGAAAGT ATATAGGACGT
N257	e497	e451	e311	e498	TTCATCCCAA TCTCACAACTA TAAGCTATCCA ATCCAACCAT
H258	e93	e12	e497	e500	AATAGGGTACA AGGAACGATT TTGGGATGAA TGGAATAGTCA
S259	e326	e231	e93	e502	ACAACTTCGA TGACCTTCTTA TGTACCCTATT AGTTCCAACA
H260	e503	e457	e326	e504	AGTAGATACGT TCGGTTATGT TCGAAGTTGT AAGGTAGTCAT
S261	e436	e451	e503	e506	ACACGACTAA TCTCACAACTA ACGTATCTACT AAAGCACTCT
N262	e153	e143	e436	e113	TAGAGGAAAGT TTGGATTGGA TTAGTCGTGT TTTTGGTTCAA
S263	nullT10S	e462	e153	e509	TTTTTTTTTT TCCATAACTCT ACTTTCCTCTA ATTCCAACCT
S264	e510	e464	nullT11N	e167	TTCACCACTT TTATGCAACAA TTTTTTTTTTT TCATAGCCAA
H265	e512	e466	e510	e431	TGGCTTTTTTA AAAGGTCGAT AAGTGGTGAA ATTACGAGAGA
N266	e514	e271	e512	e515	AAACCCATGA TCCTTACTTCA TAAAAAAGCCA AAACTGTCCA
B267	e516	e396	e514	e222	ATTAATTGCGA TCGAGTGAAT TCATGGGTTT AAAGAGAGGAA
S268	e518	e117	e516	e519	ATCGACATCA ATGTTACCCTA TCGCAATTAAT TCTGACAACA
B269	e520	e457	e518	e345	AGGGTTAGAAT TCGGTTATGT TGATGTCGAT ACAGGAAGATA
S270	e178	e476	e520	e4	TGCTCCATTA ACCTAACTCAT ATTCTAACCCT ATCACCCAAA
H271	e524	e478	e178	e525	TATGACAGAGT TTCGGAGATT TAATGGAGCA ATAGGACATGA
S272	e526	e480	e524	e527	TCGATCAACA TTTCCAATTGT ACTCTGTCATA TATCGCTCAA
N273	e528	e204	e526	e186	AGACTAATGGA ATGATGGTGT TGTTGATCGA TGGAGTAAGAT
N274	e510	e186	e528	e306	TTCACCACTT ATCTTACTCCA TCCATTAGTCT ACCATCCAAA
N275	e532	e486	e510	e386	AGTCTAAAGGA AGAGCGTTAT AAGTGGTGAA AGAAGTAGACA
S276	e534	e74	e532	e19	AACGCAATTT TCCTCGTATTA TCCTTTAGACT ACTAGCACAA
H277	e133	e490	e534	e537	TGTTTGAACTT TGTGACAAGA AAATTGCGTT AGGAGCATATA
S278	e538	e255	e133	e156	ACATTCACCT ACACGTCTATA AAGTTCAAACA ACTAACGACA
N279	e125	e494	e538	e541	TTATCTGTGGA TTGTAGCGAT AGGTGAATGT TATTGAGGCTA
S280	e542	e496	e125	e543	ACCAACTTGA ACGTCCTATAT TCCACAGATAA ATCCAACGTA
H281	e544	e498	e542	e345	ACAGGTTAGAT ATGGTTGGAT TCAAGTTGGT ACAGGAAGATA
N282	e546	e500	e544	e547	TACAACGTCA TGACTATTCCA ATCTAACCTGT AATCCGTTCT
N283	e548	e502	e546	e549	TAAGAGTGTGA TGTTGGAACT TGACGTTGTA TTAAGGGAGAA
S284	e428	e504	e548	e551	TTTCGTCTCA ATGACTACCTT TCACACTCTTA ACGATCTCAA
H285	e552	e506	e428	e553	TAGGAAAGTCA AGAGTGCTTT TGAGACGAAA TTAGATACGGA
N286	e554	e113	e552	e224	TAACAACCGT TTGAACCAAAA TGACTTTCCTA ATGACCCAAT
H287	nullT11S	e509	e554	e556	TTTTTTTTTTT AGGTTGGAAT ACGGTTGTTA ATCAGGATGTA
N288	e557	e167	nullT10N	e464	TTCGAAATGTT TTGGCTATGA TTTTTTTTTT TTGTTGCATAA
S289	e559	e431	e557	e560	AACCTGAACA TCTCTCGTAAT AACATTTCGAA AAATCCGACT
H290	e315	e515	e559	e341	AGGTATCGTAT TGGACAGTTT TGTTCAGGTT AGGTTAGACAT
S291	e256	e222	e315	e457	ACCTGACATT TTCCTCTCTTT ATACGATACCT ACATAACCGA
H292	e565	e519	e256	e566	ACGTTGATTTT TGTTGTCAGA AATGTCAGGT TTAAAGAGGGA
S293	e567	e345	e565	e568	AACTCGCTAA TATCTTCCTGT AAAATCAACGT TTCTTCTGCT
H294	e258	e4	e567	e173	AACGTGAAATT TTTGGGTGAT TTAGCGAGTT TCTAAGTGTGA
B295	e43	e525	e258	e572	TCTTTCACGT TCATGTCCTAT AATTTCACGTT ACTTGACACA
N296	e573	e527	e43	e190	ATTTGCTGATT TTGAGCGATA ACGTGAAAGA TTTAAATGCGA
S297	e575	e186	e573	e576	TTCAGCTCAA ATCTTACTCCA AATCAGCAAAT ATTTCAGCCT
H298	e189	e306	e575	e578	AGTTGATAGGT TTTGGATGGT TTGAGCTGAA TGAGTAGAACA
B299	e215	e386	e189	e415	ATCCACCATT TGTCTACTTCT ACCTATCAACT AACGTCATCT
B300	e581	e19	e215	e329	ACATATGGAGT TTGTGCTAGT AATGGTGGAT TTTCATTTGGT
S301	e71	e537	e581	e396	ACCCTTCAAT TATATGCTCCT ACTCCATATGT ATTCACTCGA
H302	e332	e156	e71	e94	TTTTGATTCGT TGTCGTTAGT ATTGAAGGGT AGGATATAGCA
S303	e587	e541	e332	e551	AACTGCTCTT TAGCCTCAATA ACGAATCAAAA ACGATCTCAA
H304	e589	e543	e587	e590	AGTAGTGACAT TACGTTGGAT AAGAGCAGTT AAGAAAAGCAA
S305	e591	e345	e589	e347	TCCACTCAAA TATCTTCCTGT ATGTCACTACT AGCCTCATTT
H306	e512	e547	e591	e594	TGGCTTTTTTA AGAACGGATT TTTGAGTGGA AGTGAGTAAGA
S307	e46	e549	e512	e596	ACAGCCATTA TTCTCCCTTAA TAAAAAAGCCA TCAACCTGTT
N308	e597	e551	e46	e598	TCGGAATTAGA TTGAGATCGT TAATGGCTGT AGATAGCGTAT
N309	e599	e553	e597	e515	AGACAACCTT TCCGTATCTAA TCTAATTCCGA AAACTGTCCA
H310	e548	e224	e599	e602	TAAGAGTGTGA ATTGGGTCAT AAGGTTGTCT TAAAATGTGCA
S311	nullT10S	e556	e548	e603	TTTTTTTTTT TACATCCTGAT TCACACTCTTA ACGATCAACT
S312	e114	e464	nullT11N	e253	AGCCTACAAA TTATGCAACAA TTTTTTTTTTT TCAAGAACCA
H313	e606	e560	e114	e398	AGACGGTAATA AGTCGGATTT TTTGTAGGCT TTCTGTAGTGA
S314	e608	e341	e606	e551	TTACGTCCAA ATGTCTAACCT TATTACCGTCT ACGATCTCAA
H315	e610	e457	e608	e6	ATGAAAATGCT TCGGTTATGT TTGGACGTAA TAAAAGGCAAA
S316	e342	e566	e610	e613	AAACCTGCTA TCCCTCTTTAA AGCATTTTCAT TCACAAACCT
H317	e614	e568	e342	e365	AAAAGGGTCTA AGCAGAAGAA TAGCAGGTTT AGTTGGTAGTA
S318	e616	e173	e614	e36	TTAAGCACCT TCACACTTAGA TAGACCCTTTT TATCAACGCT
H319	e618	e572	e616	e619	TCGTAGTATGT TGTGTCAAGT AGGTGCTTAA AGAGAAGATGT
B320	e620	e190	e618	e621	AGACCACTTT TCGCATTTAAA ACATACTACGA TACACAAGCT
H321	e450	e576	e620	e623	AGAGAATGAGT AGGCTGAAAT AAAGTGGTCT ATTAGTCTGGA
S322	e624	e578	e450	e408	ACCAGCATAA TGTTCTACTCA ACTCATTCTCT TTCTGCTCAA
H323	e597	e415	e624	e627	TCGGAATTAGA AGATGACGTT TTATGCTGGT ATTATCGGAGA
S324	e628	e329	e597	e629	TCGCATTCTA ACCAAATGAAA TCTAATTCCGA AAGTTCCCAT
H325	e630	e396	e628	e631	TAGATGTACGT TCGAGTGAAT TAGAATGCGA TTAGAGTGACA
S326	e632	e94	e630	e515	AATACCACGA TGCTATATCCT ACGTACATCTA AAACTGTCCA
H327	e467	e551	e632	e635	TGAGTATCTGT TTGAGATCGT TCGTGGTATT TAGGAGAAACT
S328	e546	e590	e467	e359	TACAACGTCA TTGCTTTTCTT ACAGATACTCA ACCAAGCTAA
H329	e638	e347	e546	e639	AGAAGGATGAT AAATGAGGCT TGACGTTGTA AGGTTTAGGTA
N330	e342	e594	e638	e641	AAACCTGCTA TCTTACTCACT ATCATCCTTCT TTCACCTGTT
H331	e275	e596	e342	e643	AGAGATGACTT AACAGGTTGA TAGCAGGTTT AGAGTTGAGTA
S332	e155	e598	e275	e645	AACCCTCTTT ATACGCTATCT AAGTCATCTCT AAGACCACAT
H333	e646	e515	e155	e647	TTTAGTGGAGA TGGACAGTTT AAAGAGGGTT ACTAGATGGAA
S334	e648	e602	e646	e649	ACGACCAATA TGCACATTTTA TCTCCACTAAA AACGTACCTT
H335	nullT11S	e603	e648	e650	TTTTTTTTTTT AGTTGATCGT TATTGGTCGT ATAGGACAAGT
H336	e651	e253	nullT10N	e652	TTCGGATAGAA TGGTTCTTGA TTTTTTTTTT TGGGTGTATAT
S337	e653	e398	e651	e629	ACCTTCAGTT TCACTACAGAA TTCTATCCGAA AAGTTCCCAT
B338	e655	e551	e653	e102	TGTAGAGGATT TTGAGATCGT AACTGAAGGT AAATTGGAACA
N339	e526	e6	e655	e658	TCGATCAACA TTTGCCTTTTA AATCCTCTACA ACACTTCCAT
H340	e659	e613	e526	e660	AGGACTAATGT AGGTTTGTGA TGTTGATCGA TAAAACGTGTT
S341	e661	e365	e659	e179	ACCAACAAGA TACTACCAACT ACATTAGTCCT AAACCTCCTT
H342	e101	e36	e661	e145	TGGAAGAGTAT AGCGTTGATA TCTTGTTGGT AGGTTCTAGTT
S343	e665	e619	e101	e666	AGCACCTTTA ACATCTTCTCT ATACTCTTCCA TTCCAGTTCA
H344	e483	e621	e665	e325	TTTTGTTCAGT AGCTTGTGTA TAAAGGTGCT ATAGTGAGGAA
S345	e669	e623	e483	e670	TACACGAACA TCCAGACTAAT ACTGAACAAAA TCCCAGAAAA
H346	e557	e408	e669	e271	TTCGAAATGTT TTGAGCAGAA TGTTCGTGTA TGAAGTAAGGA
N347	e538	e627	e557	e486	ACATTCACCT TCTCCGATAAT AACATTTCGAA ATAACGCTCT
H348	e528	e629	e538	e676	AGACTAATGGA ATGGGAACTT AGGTGAATGT ATTGTAGGACT
S349	e534	e631	e528	e294	AACGCAATTT TGTCACTCTAA TCCATTAGTCT TCATGCCTTA
N350	e48	e515	e534	e419	TGCAGTTTTTA TGGACAGTTT AAATTGCGTT AGATCTGAGTT
N351	e681	e635	e48	e682	TTTACCGACA AGTTTCTCCTA TAAAAACTGCA TCCCAATTGA
H352	e344	e359	e681	e190	TAGGAACAGAA TTAGCTTGGT TGTCGGTAAA TTTAAATGCGA
S353	e624	e639	e344	e686	ACCAGCATAA TACCTAAACCT TTCTGTTCCTA ATTCTGCACT
H354	e116	e641	e624	e688	ACAAGGATAGA AACAGGTGAA TTATGCTGGT TGGGTACTTTA
S355	e620	e643	e116	e494	AGACCACTTT TACTCAACTCT TCTATCCTTGT ATCGCTACAA
H356	e319	e645	e620	e231	TAAAATTGGCA ATGTGGTCTT AAAGTGGTCT TAAGAAGGTCA
N357	e371	e647	e319	e694	AGCCATCTTT TTCCATCTAGT TGCCAATTTTA ACAAGTCCAT
H358	e695	e649	e371	e10	AGTTGTAGTCT AAGGTACGTT AAAGATGGCT TACATGATGGA
S359	nullT10S	e650	e695	e697	TTTTTTTTTT ACTTGTCCTAT AGACTACAACT AGAAACCCAA
B360	e698	e652	nullT11N	e318	TCAATCTCGT ATATACACCCA TTTTTTTTTTT TCAAGACACA
H361	e700	e629	e698	e117	ATTGCAATGAT ATGGGAACTT ACGAGATTGA TAGGGTAACAT
B362	e702	e102	e700	e703	TCCTATCCCT TGTTCCAATTT ATCATTGCAAT ACACACTCAA
H363	e704	e658	e702	e705	AGGTAATGGTA ATGGAAGTGT AGGGATAGGA TGCATATAGGT
S364	e99	e660	e704	e707	AACTTCAGCT AACACGTTTTA TACCATTACCT TAACTGCCAA
N365	e708	e179	e99	e45	AACTGATAGGA AAGGAGGTTT AGCTGAAGTT TGAGGTATGAT
S366	e63	e145	e708	e347	TTCGTACACA AACTAGAACCT TCCTATCAGTT AGCCTCATTT
H367	e712	e666	e63	e713	TTAAGGACTGA TGAACTGGAA TGTGTACGAA AGAATATGGGT
S368	e714	e325	e712	nullT10E	ATTCGCTACT TTCCTCACTAT TCAGTCCTTAA TTTTTTTTTT
H369	e715	e670	e714	nullT11E	TGAGGATGTTA TTTTCTGGGA AGTAGCGAAT TTTTTTTTTTT
S370	e716	e271	e715	nullT10E	TCACACAGTT TCCTTACTTCA TAACATCCTCA TTTTTTTTTT
H371	e717	e486	e716	nullT11E	AGTTCTGAGAT AGAGCGTTAT AACTGTGTGA TTTTTTTTTTT
N372	e718	e676	e717	nullT10E	ACACATCCAT AGTCCTACAAT ATCTCAGAACT TTTTTTTTTT
H373	e719	e294	e718	nullT11E	AAAGAGGAGAT TAAGGCATGA ATGGATGTGT TTTTTTTTTTT
S374	e720	e419	e719	nullT10E	TCCATCGAAA AACTCAGATCT ATCTCCTCTTT TTTTTTTTTT
H375	e266	e682	e720	nullT11E	TGTAGATGAGT TCAATTGGGA TTTCGATGGA TTTTTTTTTTT
S376	e460	e190	e266	e318	TACCGTCATT TCGCATTTAAA ACTCATCTACA TCAAGACACA
H377	e352	e686	e460	e725	AGAAGTCAGAT AGTGCAGAAT AATGACGGTA TAAGTGACTGA
N378	e726	e688	e352	e425	ACCCTTTGAT TAAAGTACCCA ATCTGACTTCT ACATCGCTAA
N379	e65	e494	e726	e729	TGGCTATTAGA TTGTAGCGAT ATCAAAGGGT AGAAAGGAAGA
B380	e730	e231	e65	e731	ATCGCAACTA TGACCTTCTTA TCTAATAGCCA ATCGTCCAAT
H381	e454	e694	e730	e733	AGTGTTTTGAA ATGGACTTGT TAGTTGCGAT TGAGAGAAAGA
S382	e734	e10	e454	e735	TTCTCTTGCT TCCATCATGTA TTCAAAACACT AACACTCGAT
B383	nullT11S	e697	e734	e736	TTTTTTTTTTT TTGGGTTTCT AGCAAGAGAA AGGTCATTAGT
H384	e737	e318	nullT10N	e738	AGTCTAAAGGT TGTGTCTTGA TTTTTTTTTT AGTGTAAGAGA
S385	e739	e117	e737	e740	TTCACGAACT ATGTTACCCTA ACCTTTAGACT ACTCAACGTA
H386	e741	e703	e739	e742	TCGGTAGATTA TTGAGTGTGT AGTTCGTGAA ATGGTAGATCA
B387	e420	e705	e741	e204	ATCTGCTTCA ACCTATATGCA TAATCTACCGA ACACCATCAT
H388	e581	e707	e420	e746	ACATATGGAGT TTGGCAGTTA TGAAGCAGAT TTAGAGTGTCT
S389	e747	e45	e581	e44	AAACCCAAGA ATCATACCTCA ACTCCATATGT AAAACGCAAT
B390	e101	e347	e747	e141	TGGAAGAGTAT AAATGAGGCT TCTTGGGTTT AATGTGGAAAA
S391	nullT10S	e713	e101	e751	TTTTTTTTTT ACCCATATTCT ATACTCTTCCA AGAACCCAAA
B392	e193	e318	nullT10N	e753	TATATGGTCGT TGTGTCTTGA TTTTTTTTTT TATCGGAGAAA
S393	e514	e725	e193	e494	AAACCCATGA TCAGTCACTTA ACGACCATATA ATCGCTACAA
H394	e756	e425	e514	e757	TATGGAGCTAT TTAGCGATGT TCATGGGTTT AGGAAATAGGA
S395	e758	e729	e756	e124	TGATCCACAT TCTTCCTTTCT ATAGCTCCATA ATGCATACCA
H396	e655	e731	e758	e537	TGTAGAGGATT ATTGGACGAT ATGTGGATCA AGGAGCATATA
S397	e142	e733	e655	e763	AACGTCTTCT TCTTTCTCTCA AATCCTCTACA TTCGATCACT
H398	e764	e735	e142	e525	TTTTTGTCTGT ATCGAGTGTT AGAAGACGTT ATAGGACATGA
S399	nullT10S	e736	e764	e135	TTTTTTTTTT ACTAATGACCT ACAGACAAAAA ATCTTCTGCA
B400	e146	e738	nullT11N	e768	AGCTTCATCA TCTCTTACACT TTTTTTTTTTT TTTCCTTCCA
H401	e307	e740	e146	e210	TAGAAGGCATA TACGTTGAGT TGATGAAGCT TATATGACGGA
S402	e771	e742	e307	e184	ATTCCGTACA TGATCTACCAT TATGCCTTCTA TTCTGACCAA
B403	e108	e204	e771	e117	AGAATTAGGGA ATGATGGTGT TGTACGGAAT TAGGGTAACAT
S404	e3	e746	e108	e776	AACTTCTCGA AGACACTCTAA TCCCTAATTCT AACACAGACA
H405	e777	e44	e3	e778	AGTGGATCTTA ATTGCGTTTT TCGAGAAGTT TGTGACAGATA
S406	e554	e141	e777	e780	TAACAACCGT TTTTCCACATT TAAGATCCACT ACATTCCACT
H407	nullT11S	e751	e554	e781	TTTTTTTTTTT TTTGGGTTCT ACGGTTGTTA TTGACGAAAAT
S408	e782	e753	nullT11N	e253	ACCATGTCAT TTTCTCCGATA TTTTTTTTTTT TCAAGAACCA
H409	e784	e494	e782	e785	AGGTGAAGTAT TTGTAGCGAT ATGACATGGT ATGACAGTAGT
S410	e309	e757	e784	e282	TTCGCTCTAA TCCTATTTCCT ATACTTCACCT TCACAACGTA
B411	e76	e124	e309	e789	TGAGGACTATT TGGTATGCAT TTAGAGCGAA TAGAGGAACAT
S412	e440	e537	e76	e791	TTTACTGCCT TATATGCTCCT AATAGTCCTCA TCATGACACA
H413	e792	e763	e440	e10	AGGGATTCATA AGTGATCGAA AGGCAGTAAA TACATGATGGA
S414	e734	e525	e792	e502	TTCTCTTGCT TCATGTCCTAT TATGAATCCCT AGTTCCAACA
H415	nullT11S	e135	e734	e796	TTTTTTTTTTT TGCAGAAGAT AGCAAGAGAA ATTACAGAGGT
H416	e88	e768	nullT10N	e798	AGGGATGTAAT TGGAAGGAAA TTTTTTTTTT AGAGTGGATAA
S417	e799	e210	e88	e204	TGCTACACAA TCCGTCATATA ATTACATCCCT ACACCATCAT
H418	e801	e184	e799	e394	AAGTGAGGATA TTGGTCAGAA TTGTGTAGCA AAAAATGGACA
B419	e771	e117	e801	e547	ATTCCGTACA ATGTTACCCTA TATCCTCACTT AATCCGTTCT
H420	e573	e776	e771	e806	ATTTGCTGATT TGTCTGTGTT TGTACGGAAT TTAAGGAAGGT
S421	e747	e778	e573	e808	AAACCCAAGA TATCTGTCACA AATCAGCAAAT ACAAAGTCCA
H422	e809	e780	e747	e810	AGTATGTCTGA AGTGGAATGT TCTTGGGTTT TCAGTTTAGGA
B423	nullT10S	e781	e809	e811	TTTTTTTTTT ATTTTCGTCAA TCAGACATACT AAAGACACCT
N424	e503	e253	nullT10N	e753	AGTAGATACGT TGGTTCTTGA TTTTTTTTTT TATCGGAGAAA
S425	e814	e785	e503	e815	ACCACTGATT ACTACTGTCAT ACGTATCTACT AAACGCAAAT
H426	e816	e282	e814	e817	TGGGATCTATT TACGTTGTGA AATCAGTGGT TATACGAAGGT
B427	e818	e789	e816	e819	TACACGTCAT ATGTTCCTCTA AATAGATCCCA ATCGACTCAA
H428	e820	e791	e818	e821	AGGTAAGAGAA TGTGTCATGA ATGACGTGTA AGGTCTTGATA
N429	e822	e10	e820	e445	AGCTCAATCA TCCATCATGTA TTCTCTTACCT ACGTTAACCT
H430	e756	e502	e822	e154	TATGGAGCTAT TGTTGGAACT TGATTGAGCT AGAACTATGGT
S431	nullT10S	e796	e756	e826	TTTTTTTTTT ACCTCTGTAAT ATAGCTCCATA TCAAACGACT
S432	e827	e798	nullT11N	e828	TATTCTCGCA TTATCCACTCT TTTTTTTTTTT ACAGCATACT
H433	e829	e204	e827	e480	AGGATGTACTT ATGATGGTGT TGCGAGAATA ACAATTGGAAA
S434	e831	e394	e829	e351	ACCAGCTTTA TGTCCATTTTT AAGTACATCCT TCGACTTTCA
H435	e833	e547	e831	e834	AACAGAGAGAT AGAACGGATT TAAAGCTGGT TATTCGAGGTA
S436	e835	e806	e833	e836	ATTCGACCAT ACCTTCCTTAA ATCTCTCTGTT AGCCATACAT
H437	e837	e808	e835	e186	AGGTATGGAAT TGGACTTTGT ATGGTCGAAT TGGAGTAAGAT
S438	e313	e810	e837	e840	ACGATCATCA TCCTAAACTGA ATTCCATACCT ATTCTCAGCT
H439	nullT11S	e811	e313	e841	TTTTTTTTTTT AGGTGTCTTT TGATGATCGT ATTTTGCAGAT
S440	e187	e753	nullT11N	e843	TTCCCAAAGA TTTCTCCGATA TTTTTTTTTTT ACGTTCACTA
H441	e844	e815	e187	e845	TTTGACTGTTT ATTTGCGTTT TCTTTGGGAA TTTTCGATTGT
S442	e58	e817	e844	e847	TTCTACGCAT ACCTTCGTATA AAACAGTCAAA TACAAGCCAA
H443	e467	e819	e58	e789	TGAGTATCTGT TTGAGTCGAT ATGCGTAGAA TAGAGGAACAT
S444	e163	e821	e467	e19	TTCGCATCTA TATCAAGACCT ACAGATACTCA ACTAGCACAA
H445	e852	e445	e163	e853	AGATGGAGATT AGGTTAACGT TAGATGCGAA TAGGTTTCAGA
S446	e854	e154	e852	e543	TAACTCGCTT ACCATAGTTCT AATCTCCATCT ATCCAACGTA
H447	nullT11S	e826	e854	e736	TTTTTTTTTTT AGTCGTTTGA AAGCGAGTTA AGGTCATTAGT
H448	e857	e828	nullT10N	e858	ATCTTAGGGAA AGTATGCTGT TTTTTTTTTT AGAGTAAGGTT
S449	e859	e480	e857	e763	TTTCCAGTCA TTTCCAATTGT TTCCCTAAGAT TTCGATCACT
H450	e861	e351	e859	e345	AGGAGTGTATT TGAAAGTCGA TGACTGGAAA ACAGGAAGATA
S451	e863	e834	e861	e864	ATTTCTCCGT TACCTCGAATA AATACACTCCT TCCACAAGTT
H452	e487	e836	e863	e180	TTGGGATATCT ATGTATGGCT ACGGAGAAAT ACTTTAGAGGT
S453	e867	e186	e487	e282	ATCGCTAACA ATCTTACTCCA AGATATCCCAA TCACAACGTA
H454	e65	e840	e867	e374	TGGCTATTAGA AGCTGAGAAT TGTTAGCGAT TGTAGGAATCT
S455	nullT10S	e841	e65	e90	TTTTTTTTTT ATCTGCAAAAT TCTAATAGCCA ATTCACCGTA
H456	e422	e843	nullT10N	e873	TTGGTTTGAAT TAGTGAACGT TTTTTTTTTT AGGCTAAGTAT
S457	e67	e845	e422	e359	ACCTCACATT ACAATCGAAAA ATTCAAACCAA ACCAAGCTAA
B458	e125	e847	e67	e66	TTATCTGTGGA TTGGCTTGTA AATGTGAGGT ACGGAAATTTT
S459	e648	e789	e125	e335	ACGACCAATA ATGTTCCTCTA TCCACAGATAA AGCATCAACT
B460	e475	e19	e648	e235	AGTCGATGATA TTGTGCTAGT TATTGGTCGT TCTGGGATTAT
S461	e289	e853	e475	e815	ACACACAAGA TCTGAAACCTA TATCATCGACT AAACGCAAAT
H462	e884	e543	e289	e810	TGATAGGACTT TACGTTGGAT TCTTGTGTGT TCAGTTTAGGA
B463	nullT10S	e736	e884	e75	TTTTTTTTTT ACTAATGACCT AAGTCCTATCA TATGCACTCA
S464	e887	e858	nullT11N	nullT10E	ACAATCCGAT AACCTTACTCT TTTTTTTTTTT TTTTTTTTTT
N465	e712	e763	e887	nullT11E	TTAAGGACTGA AGTGATCGAA ATCGGATTGT TTTTTTTTTTT
S466	e518	e345	e712	nullT10E	ATCGACATCA TATCTTCCTGT TCAGTCCTTAA TTTTTTTTTT
H467	e890	e864	e518	nullT11E	ATGGATCTGAT AACTTGTGGA TGATGTCGAT TTTTTTTTTTT
N468	e891	e180	e890	nullT10E	TACCAAAGCA ACCTCTAAAGT ATCAGATCCAT TTTTTTTTTT
H469	e73	e282	e891	nullT11E	AGTAGACTGAA TACGTTGTGA TGCTTTGGTA TTTTTTTTTTT
S470	e893	e374	e73	nullT10E	TTACCACGAA AGATTCCTACA TTCAGTCTACT TTTTTTTTTT
B471	nullT11S	e90	e893	nullT11E	TTTTTTTTTTT TACGGTGAAT TTCGTGGTAA TTTTTTTTTTT
S472	e716	e873	nullT11N	nullT10E	TCACACAGTT ATACTTAGCCT TTTTTTTTTTT TTTTTTTTTT
N473	e185	e359	e716	nullT11E	TTAGGATGACA TTAGCTTGGT AACTGTGTGA TTTTTTTTTTT
S474	e887	e66	e185	nullT10E	ACAATCCGAT AAAATTTCCGT TGTCATCCTAA TTTTTTTTTT
H475	e897	e335	e887	nullT11E	ATTCGTAGAGA AGTTGATGCT ATCGGATTGT TTTTTTTTTTT
S476	e898	e235	e897	nullT10E	ATCTCATGCA ATAATCCCAGA TCTCTACGAAT TTTTTTTTTT
N477	e890	e815	e898	nullT11E	ATGGATCTGAT ATTTGCGTTT TGCATGAGAT TTTTTTTTTTT
N478	e898	e810	e890	nullT10E	ATCTCATGCA TCCTAAACTGA ATCAGATCCAT TTTTTTTTTT
H479	nullT11S	e75	e898	nullT11E	TTTTTTTTTTT TGAGTGCATA TGCATGAGAT TTTTTTTTTTT
A480	e901	nullT10W	nullT10N	e182	ACAAGGGATAT TTTTTTTTTT TTTTTTTTTT AGAGCTATGAT
A481	e18	nullT11W	e901	e192	TAGCATCACA TTTTTTTTTTT ATATCCCTTGT TTCGACACTT
A482	e9	nullT10W	e26	e537	TTAGTATCGGT TTTTTTTTTT AGGTAACGTT AGGAGCATATA
A483	e913	nullT10W	e11	e635	AGATGTCAGAT TTTTTTTTTT AAGAAGCAGT TAGGAGAAACT
I484	e7	nullT11W	e913	e916	TCACATACGT TTTTTTTTTTT ATCTGACATCT TTCCATTCGA
A485	e917	nullT10W	e7	e623	TTAGGGAATCT TTTTTTTTTT ACGTATGTGA ATTAGTCTGGA
I486	e207	nullT11W	e917	e433	TTTCCCTTGA TTTTTTTTTTT AGATTCCCTAA TAACACAGCA
A487	e5	nullT10W	e207	e541	AGGTTAAGAGA TTTTTTTTTT TCAAGGGAAA TATTGAGGCTA
I488	e20	nullT10W	e7	e194	AAGATACGAGA TTTTTTTTTT ACGTATGTGA AGAGTTAGGAA
A489	e929	nullT10W	e22	e173	TTAAGCTAGGT TTTTTTTTTT TAGAGCGAAA TCTAAGTGTGA
A490	e207	nullT11W	e929	e932	TTTCCCTTGA TTTTTTTTTTT ACCTAGCTTAA TACCATGCTT
I491	e28	nullT10W	e207	e365	TTTCGGATAGA TTTTTTTTTT TCAAGGGAAA AGTTGGTAGTA
I492	e20	nullT10W	e207	e70	AAGATACGAGA TTTTTTTTTT TCAAGGGAAA TTTTTAAGCGT
I493	e939	nullT11W	e20	e847	AACAAGTCCT TTTTTTTTTTT TCTCGTATCTT TACAAGCCAA
A494	e16	nullT10W	e939	e345	TACGGTATTGA TTTTTTTTTT AGGACTTGTT ACAGGAAGATA
A495	e28	nullT10W	e18	e500	TTTCGGATAGA TTTTTTTTTT TGTGATGCTA TGGAATAGTCA
I496	e792	e192	e110	e394	AGGGATTCATA AAGTGTCGAA AAGGTTCAGT AAAAATGGACA
I497	e440	e21	e792	e298	TTTACTGCCT TCCCTATGAAA TATGAATCCCT TCATCACCAT
I498	e581	e27	e440	e537	ACATATGGAGT AAGAAAGGCT AGGCAGTAAA AGGAGCATATA
A499	e48	e12	e71	e57	TGCAGTTTTTA AGGAACGATT ATTGAAGGGT ATAGACAGGAA
A500	e483	e916	e681	e963	TTTTGTTCAGT TCGAATGGAA TGTCGGTAAA TTTGTCAATGT
I501	e332	e433	e669	e431	TTTTGATTCGT TGCTGTGTTA TGTTCGTGTA ATTACGAGAGA
A502	e238	e8	e587	e329	TTGAGAGTAGT TGGATCGATT AAGAGCAGTT TTTCATTTGGT
A503	e217	e23	e240	e374	TCGTTTAGAGA TGGGTTCTTT AAGGAATCGA TGTAGGAATCT
A504	e213	e932	e155	e729	TTCTATGTGGA AAGCATGGTA AAAGAGGGTT AGAAAGGAAGA
A505	e483	e196	e411	e983	TTTTGTTCAGT TAGGCAATGA TGTAGGCAAT AGTAATCAGGA
A506	e589	e847	e485	e806	AGTAGTGACAT TTGGCTTGTA ACTGGGAATT TTAAGGAAGGT
A507	e544	e19	e591	e598	ACAGGTTAGAT TTGTGCTAGT TTTGAGTGGA AGATAGCGTAT
A508	nullT11S	e30	e546	e74	TTTTTTTTTTT TGTGTTGAGT TGACGTTGTA TAATACGAGGA
A509	e829	e229	nullT10N	e122	AGGATGTACTT AGGAGGTAGA TTTTTTTTTT AGTAGGAAGAA
A510	e76	e298	e831	e66	TGAGGACTATT ATGGTGATGA TAAAGCTGGT ACGGAAATTTT
A511	e1007	e682	e86	e141	AGCAGGTATTA TCAATTGGGA AAAGAAGGGT AATGTGGAAAA
I512	e624	e963	e1007	e139	ACCAGCATAA ACATTGACAAA TAATACCTGCT TCGACTTCTT
I513	e475	e670	e624	e74	AGTCGATGATA TTTTCTGGGA TTATGCTGGT TAATACGAGGA
A514	e418	e241	e628	e255	TAAATGGGAGA ATGTAGCAGT TAGAATGCGA TATAGACGTGT
I515	e756	e220	e420	e834	TATGGAGCTAT ATGTGACAGT TGAAGCAGAT TATTCGAGGTA
A516	e1027	e412	e758	e357	TTATTTTGCGT ATGAAGACGA ATGTGGATCA TGAAAGAGGTA
I517	e814	e983	e1027	e363	ACCACTGATT TCCTGATTACT ACGCAAAATAA TTAACAGCCA
A518	e833	e486	e814	e222	AACAGAGAGAT AGAGCGTTAT AATCAGTGGT AAAGAGAGGAA
A519	e275	e347	e835	e1036	AGAGATGACTT AAATGAGGCT ATGGTCGAAT AATCGGAAAAA
I520	e516	e547	e155	e10	ATTAATTGCGA AGAACGGATT AAAGAGGGTT TACATGATGGA
I521	nullT10S	e74	e516	e509	TTTTTTTTTT TCCTCGTATTA TCGCAATTAAT ATTCCAACCT
A522	e61	e791	e95	e1049	TTGAGGGATAT TGTGTCATGA AAGGGTCAAT AGTACGAGTAT
I523	e101	e139	e146	e38	TGGAAGAGTAT AAGAAGTCGA TGATGAAGCT ATTGTTTGACA
A524	e1060	e478	e103	e660	TAGAGATGCTT TTCGGAGATT AGACTGGTTT TAAAACGTGTT
I525	e240	e598	e1060	e220	TCGATTCCTT ATACGCTATCT AAGCATCTCTA ACTGTCACAT
I526	e133	e629	e240	e210	TGTTTGAACTT ATGGGAACTT AAGGAATCGA TATATGACGGA
A527	e861	e237	e538	e431	AGGAGTGTATT TTAGGCAAGT AGGTGAATGT ATTACGAGAGA
A528	e332	e124	e863	e365	TTTTGATTCGT TGGTATGCAT ACGGAGAAAT AGTTGGTAGTA
A529	e1076	e363	e428	e102	AGGAAGATTCT TGGCTGTTAA TGAGACGAAA AAATTGGAACA
I530	e493	e222	e1076	e670	ACTTTCTCGT TTCCTCTCTTT AGAATCTTCCT TCCCAGAAAA
A531	e581	e836	e493	e14	ACATATGGAGT ATGTATGGCT ACGAGAAAGT TGGTGAGATTA
I532	e1082	e1036	e581	e527	ATTCCATCGT TTTTTCCGATT ACTCCATATGT TATCGCTCAA
A533	e454	e645	e1082	e778	AGTGTTTTGAA ATGTGGTCTT ACGATGGAAT TGTGACAGATA
A534	nullT11S	e509	e734	e274	TTTTTTTTTTT AGGTTGGAAT AGCAAGAGAA ATTGAAGCAAA
A535	e651	e152	nullT10N	e17	TTCGGATAGAA AAGGGTGAAT TTTTTTTTTT AGGAGTTTACT
A536	e1093	e96	e653	e619	AGGTACGATTA TGGCTGTAAT AACTGAAGGT AGAGAAGATGT
I537	e146	e1049	e1093	e273	AGCTTCATCA ATACTCGTACT TAATCGTACCT AGCTCTCATT
I538	e136	e363	e146	e177	AGAACTAAGGA TGGCTGTTAA TGATGAAGCT AGCAAAAGAAA
A539	e65	e171	e138	e845	TGGCTATTAGA TGGTTTGCTA TTGTTGGCTA TTTTCGATTGT
A540	e704	e104	e67	e345	AGGTAATGGTA TGGCAGTAAT AATGTGAGGT ACAGGAAGATA
A541	e112	e220	e99	e757	ATCTTGGAGTA ATGTGACAGT AGCTGAAGTT AGGAAATAGGA
A542	e557	e156	e256	e141	TTCGAAATGTT TGTCGTTAGT AATGTCAGGT AATGTGGAAAA
A543	e659	e864	e559	e218	AGGACTAATGT AACTTGTGGA TGTTCAGGTT TCTTAGAAGGT
A544	e328	e429	e661	e89	AATGCAGATTT TTGTGGCTTA TCTTGTTGGT ATATGGTAGCT
A545	e41	e670	e330	e553	TGGATGATACT TTTTCTGGGA TTTGGAGTGT TTAGATACGGA
A546	e319	e735	e747	e341	TAAAATTGGCA ATCGAGTGTT TCTTGGGTTT AGGTTAGACAT
A547	e101	e629	e46	e29	TGGAAGAGTAT ATGGGAACTT TAATGGCTGT TTAGTAGGTGT
A548	e93	e273	e665	e202	AATAGGGTACA AATGAGAGCT TAAAGGTGCT AATTTTTCGGT
A549	e422	e139	e399	e259	TTGGTTTGAAT AAGAAGTCGA TGCGTTTTTT ATGTAGTAGCA
A550	e389	e68	e67	e271	AGGGATTTAGT TGAAATGGGT AATGTGAGGT TGAAGTAAGGA
A551	e784	e707	e391	e504	AGGTGAAGTAT TTGGCAGTTA TATGGTTCGT AAGGTAGTCAT
A552	e777	e257	e309	e263	AGTGGATCTTA AGGTGTTTCT TTAGAGCGAA TTAGTTCAGGA
A553	e262	e560	e554	e733	TAGTCAGTTGA AGTCGGATTT ACGGTTGTTA TGAGAGAAAGA
A554	e116	e179	e110	e296	ACAAGGATAGA AAGGAGGTTT AAGGTTCAGT TGGAGACTAAT
A555	e597	e331	e118	e74	TCGGAATTAGA AAGGGACAAT TTGGTGACTT TAATACGAGGA
A556	e234	e44	e599	e53	AGAACAGAGTA ATTGCGTTTT AAGGTTGTCT AGTATTACGGA
A557	e606	e808	e236	e451	AGACGGTAATA TGGACTTTGT TGGATGTCAA TAGTTGTGAGA
A558	nullT11S	e321	e608	e796	TTTTTTTTTTT AGCTGATTGA TTGGACGTAA ATTACAGAGGT
A559	e56	e47	nullT10N	e1184	AGTAGTGAAGT ACGAGTTGAA TTTTTTTTTT ACTTGGTAGAT
A560	e246	e666	e58	e117	TGTTGTTGATT TGAACTGGAA ATGCGTAGAA TAGGGTAACAT
A561	e520	e400	e248	e394	AGGGTTAGAAT TGTGAAGGAA AGTTCGGATT AAAAATGGACA
I562	e758	e259	e520	e290	TGATCCACAT TGCTACTACAT ATTCTAACCCT AGTTCACACA
I563	e315	e359	e758	e345	AGGTATCGTAT TTAGCTTGGT ATGTGGATCA ACAGGAAGATA
A564	e548	e310	e313	e235	TAAGAGTGTGA TGTAAGTGCT TGATGATCGT TCTGGGATTAT
I565	e307	e282	e428	e345	TAGAAGGCATA TACGTTGTGA TGAGACGAAA ACAGGAAGATA
A566	e655	e780	e309	e66	TGTAGAGGATT AGTGGAATGT TTAGAGCGAA ACGGAAATTTT
A567	e532	e119	e342	e49	AGTCTAAAGGA ACGTGAAGAA TAGCAGGTTT ATTAGTGGGTA
I568	e311	e237	e82	e1036	TGGATAGCTTA TTAGGCAAGT ATGGTGTCAA AATCGGAAAAA
A569	e756	e551	e497	e206	TATGGAGCTAT TTGAGATCGT TTGGGATGAA AAAAGTTGTGT
I570	e1230	e1184	nullT11N	e323	AAGCTCTTCA ATCTACCAAGT TTTTTTTTTTT TCACCGTTAT
A571	e737	e59	e1230	e1233	AGTCTAAAGGT TTGTGGTGAT TGAAGAGCTT TTTTGCATGAT
A572	e1236	e64	e739	e1237	AAGAGGTAGAA ATGATGAGCA AGTTCGTGAA ATAGTCTTGGA
I573	e1238	e394	e1236	e1239	AACCATGTCT TGTCCATTTTT TTCTACCTCTT ACCCAATGAT
A574	e565	e290	e1238	e186	ACGTTGATTTT TGTGTGAACT AGACATGGTT TGGAGTAAGAT
A575	e897	e318	e567	e650	ATTCGTAGAGA TGTGTCTTGA TTAGCGAGTT ATAGGACAAGT
A576	e712	e551	e898	nullT11E	TTAAGGACTGA TTGAGATCGT TGCATGAGAT TTTTTTTTTTT
I577	e185	e310	e518	nullT11E	TTAGGATGACA TGTAAGTGCT TGATGTCGAT TTTTTTTTTTT
A578	e356	e343	e714	nullT11E	ATGGTTTTGTT AGAGCGTAAT AGTAGCGAAT TTTTTTTTTTT
A579	e463	e19	e358	e1257	AGAGTGATGAT TTGTGCTAGT TGTGATACGT ATTGATGCAAA
A580	e1260	e83	e54	e280	AGAAGTACAGA TGTTGGGTAA AGGAACAAGT AGGAAAGACTA
I581	e1262	e1036	e1260	e551	ACCCTTTGAA TTTTTCCGATT TCTGTACTTCT ACGATCTCAA
A582	e250	e498	e1262	e288	ACTGAGGATAA ATGGTTGGAT TTCAAAGGGT AAAGGCTAGTA
A583	nullT11S	e826	e187	e462	TTTTTTTTTTT AGTCGTTTGA TCTTTGGGAA AGAGTTATGGA
I584	e63	e1233	e250	e1272	TTCGTACACA ATCATGCAAAA TTATCCTCAGT TATCTGCACA
A585	e33	e740	e63	e243	TGCGATATTTT TACGTTGAGT TGTGTACGAA TTCGGTATAGA
I586	e669	e1237	e33	e1276	TACACGAACA TCCAAGACTAT AAAATATCGCA AAGCCATCTT
A587	e573	e1239	e669	e406	ATTTGCTGATT ATCATTGGGT TGTTCGTGTA TTTACTGGGTA
A588	e695	e568	e575	e320	AGTTGTAGTCT AGCAGAAGAA TTGAGCTGAA AATGTCTAGGA
A589	e88	e359	nullT10N	e464	AGGGATGTAAT TTAGCTTGGT TTTTTTTTTT TTGTTGCATAA
I590	e31	e1257	e88	e404	TTACACCGAT TTTGCATCAAT ATTACATCCCT TTGCACCTTA
A591	e324	e466	e31	e578	TTAGGTAGCAT AAAGGTCGAT ATCGGTGTAA TGAGTAGAACA
I592	e332	e551	e326	e145	TTTTGATTCGT TTGAGATCGT TCGAAGTTGT AGGTTCTAGTT
A593	e153	e253	e334	e447	TAGAGGAAAGT TGGTTCTTGA TCGTTATGGT TACATGGAAGA
I594	e82	e370	nullT11N	e32	TTGACACCAT TGTTCACTTTT TTTTTTTTTTT TCACCAAACT
A595	e287	e1272	e82	e231	TGTATGAAGGA TGTGCAGATA ATGGTGTCAA TAAGAAGGTCA
A596	e450	e1276	e289	e378	AGAGAATGAGT AAGATGGCTT TCTTGTGTGT TATGACTGTGA
A597	e479	e576	e187	e198	ATGGATTAGGA AGGCTGAAAT TCTTTGGGAA ATGATTGCAAT
A598	nullT11S	e697	e481	e1313	TTTTTTTTTTT TTGGGTTTCT AAGATGCTGA ACTAAAGGAGT
A599	e708	e327	e624	e239	AACTGATAGGA TTGGTGGTAA TTATGCTGGT ACAATGGAAAA
I600	e41	e335	e63	e817	TGGATGATACT AGTTGATGCT TGTGTACGAA TATACGAAGGT
I601	nullT11S	e509	e493	e841	TTTTTTTTTTT AGGTTGGAAT ACGAGAAAGT ATTTTGCAGAT
I602	e275	e32	nullT10N	e753	AGAGATGACTT AGTTTGGTGA TTTTTTTTTT TATCGGAGAAA
I603	e422	e290	e277	e480	TTGGTTTGAAT TGTGTGAACT AAATGGGTGA ACAATTGGAAA
A604	e1341	e204	e244	e476	TTGACATTGTT ATGATGGTGT TTATGGACGT ATGAGTTAGGT
I605	nullT10S	e1313	e1341	e150	TTTTTTTTTT ACTCCTTTAGT AACAATGTCAA TAACACCCAA
A606	e283	e408	e436	e10	ATGTGAGTAGT TTGAGCAGAA TTAGTCGTGT TACATGATGGA
A607	e1352	e347	e285	e742	AGGATCTGATT AAATGAGGCT TGTGCGATAT ATGGTAGATCA
I608	e726	e817	e1352	e19	ACCCTTTGAT ACCTTCGTATA AATCAGATCCT ACTAGCACAA
A609	e857	e265	e187	e789	ATCTTAGGGAA AAGACGGAAA TCTTTGGGAA TAGAGGAACAT
A610	e381	e425	e859	e390	AGGAGTTACTT TTAGCGATGT TGACTGGAAA AAAGCATTGAT
A611	e520	e87	e383	e126	AGGGTTAGAAT TAGTGGCAAT TAGAAAGCGA AGACTTAGGAA
A612	e37	e506	e782	e222	AAGGGATTAGT AGAGTGCTTT ATGACATGGT AAAGAGAGGAA
A613	e307	e286	e39	e81	TAGAAGGCATA TGTCGAGATT TTCGGAGTTT AAAATTAGCGT
A614	e1384	e19	e771	e145	TGGTCATAGAT TTGTGCTAGT TGTACGGAAT AGGTTCTAGTT
I615	e91	e729	e1384	e1387	ATGTCCACTT TCTTCCTTTCT ATCTATGACCA ATGCCACTTA
A616	nullT11S	e90	e91	e713	TTTTTTTTTTT TACGGTGAAT AAGTGGACAT AGAATATGGGT
A617	e125	e843	nullT10N	e370	TTATCTGTGGA TAGTGAACGT TTTTTTTTTT AAAAGTGAACA
A618	e434	e763	e648	e34	TAGCATGAGTA AGTGATCGAA TATTGGTCGT AGCTAGTGTTA
A619	e1	nullT10W	e203	e631	TGGGAATATCT TTTTTTTTTT TATTGCTGGT TTAGAGTGACA
A620	e209	nullT10W	e3	e259	AGTTTGTTTGT TTTTTTTTTT TCGAGAAGTT ATGTAGTAGCA
A621	e197	nullT10W	e211	e210	AGATGTGATCT TTTTTTTTTT TGGGAAGTTT TATATGACGGA
I622	e266	e253	e67	e394	TGTAGATGAGT TGGTTCTTGA AATGTGAGGT AAAAATGGACA
A623	e108	e40	e268	e173	AGAATTAGGGA TGTGGTACAA TGGTTACGAT TCTAAGTGTGA
A624	e101	e1387	e174	e190	TGGAAGAGTAT TAAGTGGCAT ATCTGGGTTT TTTAAATGCGA
A625	e61	e335	e416	e42	TTGAGGGATAT AGTTGATGCT AAGGGAACAA TCAAGAAGGTA
A626	e140	e224	e63	e480	ACGAGATAGAA ATTGGGTCAT TGTGTACGAA ACAATTGGAAA
I627	e315	e156	e142	e329	AGGTATCGTAT TGTCGTTAGT AGAAGACGTT TTTCATTTGGT
A628	e655	e380	e256	e414	TGTAGAGGATT TGTTGGTCTT AATGTCAGGT TGATTAGGAGT
A629	e303	e4	e534	e94	ATGTAGGGTAA TTTGGGTGAT AAATTGCGTT AGGATATAGCA
A630	e438	e200	e799	e325	TAGTGGTTGTA AATCGGAGTT TTGTGTAGCA ATAGTGAGGAA
A631	e614	e269	e440	e194	AAAAGGGTCTA ATGCTGAGAT AGGCAGTAAA AGAGTTAGGAA
A632	e93	e111	e616	e235	AATAGGGTACA TGTTACGAGT AGGTGCTTAA TCTGGGATTAT
A633	e266	e4	e326	e853	TGTAGATGAGT TTTGGGTGAT TCGAAGTTGT TAGGTTTCAGA
A634	nullT11S	e751	e460	e368	TTTTTTTTTTT TTTGGGTTCT AATGACGGTA AGAATCAGGAT
A635	e69	e417	nullT10N	e798	ATGGGATTAGA TTCGGAAGAT TTTTTTTTTT AGAGTGGATAA
A636	e524	e64	e71	e427	TATGACAGAGT ATGATGAGCA ATTGAAGGGT ATATAGAGGCA
A637	e157	e143	e526	e1492	ACAGTAGGATT TTGGATTGGA TGTTGATCGA TTTAGGACGTA
A638	e458	e457	e375	e496	TAGCTAATGGA TCGGTTATGT ATGAGGTGTT ATATAGGACGT
A639	e487	e658	e460	e94	TTGGGATATCT ATGGAAGTGT AATGACGGTA AGGATATAGCA
A640	e121	e294	e867	e38	AAGTACTGAGA TAAGGCATGA TGTTAGCGAT ATTGTTTGACA
A641	e405	e306	e123	e304	TCGAGAGATTA TTTGGATGGT TTATGGCAGT AAGAGAGTGTA
A642	e168	e441	e371	e1516	AGAGTTTAGGA ACGTGTATGT AAAGATGGCT ATCAAGGTAGA
A643	e279	e36	e293	e639	ACTTGTAGGAT AGCGTTGATA TTTGGGTACA AGGTTTAGGTA
A644	e475	e502	e281	e6	AGTCGATGATA TGTTGGAACT TGTGCAGTTA TAAAAGGCAAA
I645	nullT10S	e368	e364	e697	TTTTTTTTTT ATCCTGATTCT AGTTTACTCCT AGAAACCCAA
A646	e161	e72	e827	e423	AGGGTTCTAAT ACTGGTGATT TGCGAGAATA ATAGCAGGATA
A647	e1536	e527	e473	e746	AGTGTGAGATA TTGAGCGATA AGTGAGTTGT TTAGAGTGTCT
I648	e1538	e1492	e1536	e376	ACGACACATA TACGTCCTAAA TATCTCACACT TGCCATATCA
A649	e125	e376	e1538	e169	TTATCTGTGGA TGATATGGCA TATGTGTCGT AGATCAGTGTA
A650	e630	e143	e542	e149	TAGATGTACGT TTGGATTGGA TCAAGTTGGT ATGGGATCATA
A651	e319	e282	e632	e226	TAAAATTGGCA TACGTTGTGA TCGTGGTATT AGAGTAGTGTT
A652	e348	e124	e114	e817	TGGTAAGTACT TGGTATGCAT TTTGTAGGCT TATACGAAGGT
A653	e344	e408	e127	e785	TAGGAACAGAA TTGAGCAGAA TTGGAACGTA ATGACAGTAGT
I654	e1562	e1516	e161	e1563	AACATACCGA TCTACCTTGAT ATTAGAACCCT ATTCATCCGT
A655	e344	e294	e1562	e308	TAGGAACAGAA TAAGGCATGA TCGGTATGTT AGCAAAGAAAT
I656	e33	e282	e624	e10	TGCGATATTTT TACGTTGTGA TTATGCTGGT TACATGATGGA
A657	e33	e815	e35	e566	TGCGATATTTT ATTTGCGTTT TCAGGGAAAA TTAAAGAGGGA
I658	e1574	e365	e33	e1575	AACTCCCTTT TACTACCAACT AAAATATCGCA TACCCACAAA
A659	nullT11S	e697	e1574	e165	TTTTTTTTTTT TTGGGTTTCT AAAGGGAGTT AGTGAACAAAA
A660	e467	e828	nullT10N	e2	TGAGTATCTGT AGTATGCTGT TTTTTTTTTT TTCATGTTGTT
A661	e108	e457	e223	e49	AGAATTAGGGA TCGGTTATGT TGGTGCATAT ATTAGTGGGTA
I662	e213	e376	e3	e154	TTCTATGTGGA TGATATGGCA TCGAGAAGTT AGAACTATGGT
A663	e176	e543	e215	e70	TATCGGAAGTA TACGTTGGAT AATGGTGGAT TTTTTAAGCGT
A664	e270	e515	e178	e1594	AGGAAGGAATA TGGACAGTTT TAATGGAGCA ATAGGTGACAT
A665	e844	e449	e272	e676	TTTGACTGTTT TCTGTTTGGT TCGTGAAAGA ATTGTAGGACT
I666	e503	e351	e58	e810	AGTAGATACGT TGAAAGTCGA ATGCGTAGAA TCAGTTTAGGA
I667	e157	e347	e814	e180	ACAGTAGGATT AAATGAGGCT AATCAGTGGT ACTTTAGAGGT
A668	e352	e1563	e159	e810	AGAAGTCAGAT ACGGATGAAT AGCTGTGATT TCAGTTTAGGA
A669	e820	e686	e354	e647	AGGTAAGAGAA AGTGCAGAAT ACGTGTGTAT ACTAGATGGAA
A670	e610	e36	e822	e316	ATGAAAATGCT AGCGTTGATA TGATTGAGCT AAAATGCAAGA
A671	e581	e1575	e342	e113	ACATATGGAGT TTTGTGGGTA TAGCAGGTTT TTTTGGTTCAA
I672	nullT10S	e165	e581	e90	TTTTTTTTTT TTTTGTTCACT ACTCCATATGT ATTCACCGTA
A673	e76	e396	e31	e45	TGAGGACTATT TCGAGTGAAT ATCGGTGTAA TGAGGTATGAT
A674	e852	e776	e78	e255	AGATGGAGATT TGTCTGTGTT TGGATATGCA TATAGACGTGT
A675	e97	e216	e854	e821	TGGTAGTAACT AGAGCAATGA AAGCGAGTTA AGGTCTTGATA
I676	e518	e1594	e708	nullT10E	ATCGACATCA ATGTCACCTAT TCCTATCAGTT TTTTTTTTTT
A677	e717	e273	e518	nullT11E	AGTTCTGAGAT AATGAGAGCT TGATGTCGAT TTTTTTTTTTT
A678	e890	e847	e718	nullT11E	ATGGATCTGAT TTGGCTTGTA ATGGATGTGT TTTTTTTTTTT
A679	e837	e160	e891	nullT11E	AGGTATGGAAT TTTGATCGGA TGCTTTGGTA TTTTTTTTTTT
I680	e487	e445	e371	e357	TTGGGATATCT AGGTTAACGT AAAGATGGCT TGAAAGAGGTA
A681	e552	e613	e489	e410	TAGGAAAGTCA AGGTTTGTGA TTGGCAGTAT TTATGTTTGCA
I682	nullT11S	e90	e554	e368	TTTTTTTTTTT TACGGTGAAT ACGGTTGTTA AGAATCAGGAT
I683	e581	e32	nullT10N	e137	ACATATGGAGT AGTTTGGTGA TTTTTTTTTT AACTATGAGGA
A684	e299	e79	e747	e725	ATGGATGTCTA TGGTTGCTAA TCTTGGGTTT TAAGTGACTGA
I685	e467	e543	e301	e186	TGAGTATCTGT TACGTTGGAT TCTGTTGGAA TGGAGTAAGAT
A686	e73	e100	e163	e594	AGTAGACTGAA TAAGCGTGAT TAGATGCGAA AGTGAGTAAGA
A687	e393	e840	nullT10N	e62	TAACTGGAAGA AGCTGAGAAT TTTTTTTTTT TCGAGAGATAA
A688	e401	e694	e151	e251	AGTAATCTGGT ATGGACTTGT TCATGGATGT TAATAGTCGGA
A689	e454	e490	e403	e643	AGTGTTTTGAA TGTGACAAGA AAGTCGTGAT AGAGTTGAGTA
A690	e193	e44	e166	e627	TATATGGTCGT ATTGCGTTTT TGTTCTGTGT ATTATCGGAGA
A691	e528	e302	e514	e98	AGACTAATGGA ATGGGTTGAA TCATGGGTTT ATAGAGTTGGA
A692	e638	e19	e510	e688	AGAAGGATGAT TTGTGCTAGT AAGTGGTGAA TGGGTACTTTA
I693	nullT11S	e75	e342	e45	TTTTTTTTTTT TGAGTGCATA TAGCAGGTTT TGAGGTATGAT
A694	e295	e396	e106	e21	ATGTAGGACTT TCGAGTGAAT ATGTCGGTAA TTTCATAGGGA
A695	e116	e404	e297	e549	ACAAGGATAGA TAAGGTGCAA TGTGACATGT TTAAGGGAGAA
I696	e512	e457	e620	e102	TGGCTTTTTTA TCGGTTATGT AAAGTGGTCT AAATTGGAACA
A697	nullT11S	e415	e514	e60	TTTTTTTTTTT AGATGACGTT TCATGGGTTT TAGGAAGACAA
A698	e172	e641	e726	e34	TGGAGATACAT AACAGGTGAA ATCAAAGGGT AGCTAGTGTTA
I699	nullT10S	e45	e172	e1737	TTTTTTTTTT ATCATACCTCA ATGTATCTCCA TCCAATCACA
A700	e48	e107	nullT10N	e62	TGCAGTTTTTA TTCGATGGAT TTTTTTTTTT TCGAGAGATAA
A701	e512	e298	e50	e602	TGGCTTTTTTA ATGGTGATGA TAGCGATGAA TAAAATGTGCA
A702	e129	e494	e46	e214	ATACTGGATGA TTGTAGCGAT TAATGGCTGT AGATTATCGGA
I703	e88	e515	e131	e525	AGGGATGTAAT TGGACAGTTT TTTCGAGGTT ATAGGACATGA
I704	e1757	e541	e532	e327	ACCCTCAAAA TAGCCTCAATA TCCTTTAGACT TTACCACCAA
A705	e136	e128	e1757	e834	AGAACTAAGGA AAGCAGATGT TTTTGAGGGT TATTCGAGGTA
A706	nullT11S	e1737	e163	e736	TTTTTTTTTTT TGTGATTGGA TAGATGCGAA AGGTCATTAGT
A707	e646	e51	e91	e117	TTTAGTGGAGA AGGTTTGACT AAGTGGACAT TAGGGTAACAT
A708	e258	e596	e648	e109	AACGTGAAATT AACAGGTTGA TATTGGTCGT TAGAGAATCGA
A709	e792	e27	e260	e590	AGGGATTCATA AAGAAAGGCT AAGGCTGATT AAGAAAAGCAA
A710	nullT11S	e90	e734	e556	TTTTTTTTTTT TACGGTGAAT AGCAAGAGAA ATCAGGATGTA
A711	e430	e167	nullT10N	e858	ACTATGTGAGT TTGGCTATGA TTTTTTTTTT AGAGTAAGGTT
I712	e1789	e834	e157	e1790	ACTTACTGCA TACCTCGAATA AATCCTACTGT TCTTCAGCAT
A713	e144	e224	e1789	e329	AGTGATTAGGA ATTGGGTCAT TGCAGTAAGT TTTCATTTGGT
A714	e764	e160	e146	e419	TTTTTGTCTGT TTTGATCGGA TGATGAAGCT AGATCTGAGTT
A715	e516	e92	nullT10N	e873	ATTAATTGCGA ATTGGATCGA TTTTTTTTTT AGGCTAAGTAT
A716	e315	e649	e518	e1803	AGGTATCGTAT AAGGTACGTT TGATGTCGAT TTCTAGGAAGT
A717	e73	e433	e887	nullT11E	AGTAGACTGAA TGCTGTGTTA ATCGGATTGT TTTTTTTTTTT
A718	e1816	e1790	e893	nullT11E	TTGCGATAAAA ATGCTGAAGA TTCGTGGTAA TTTTTTTTTTT
I719	e893	e329	e1816	nullT10E	TTACCACGAA ACCAAATGAAA TTTTATCGCAA TTTTTTTTTT
A720	e719	e147	e893	nullT11E	AAAGAGGAGAT AGTAGTGCAT TTCGTGGTAA TTTTTTTTTTT
A721	nullT11S	e135	e720	nullT11E	TTTTTTTTTTT TGCAGAAGAT TTTCGATGGA TTTTTTTTTTT
A722	e1821	e519	e716	nullT11E	AGGGAAGTATT TGTTGTCAGA AACTGTGTGA TTTTTTTTTTT
A723	e1822	e1803	e1821	nullT10E	TGCCTTACAA ACTTCCTAGAA AATACTTCCCT TTTTTTTTTT
A724	e715	e339	e1822	nullT11E	TGAGGATGTTA AGCAGGATTT TTGTAAGGCA TTTTTTTTTTT
A725	e1826	e549	e185	nullT10E	ATCACCGAAT TTCTCCCTTAA TGTCATCCTAA TTTTTTTTTT
A726	nullT11S	e603	e1826	nullT11E	TTTTTTTTTTT AGTTGATCGT ATTCGGTGAT TTTTTTTTTTT
M727	e197	nullT10W	nullT10N	e652	AGATGTGATCT TTTTTTTTTT TTTTTTTTTT TGGGTGTATAT
M728	e20	nullT10W	e67	e38	AAGATACGAGA TTTTTTTTTT AATGTGAGGT ATTGTTTGACA
M729	e5	nullT10W	e939	e98	AGGTTAAGAGA TTTTTTTTTT AGGACTTGTT ATAGAGTTGGA
M730	e16	nullT10W	e7	e602	TACGGTATTGA TTTTTTTTTT ACGTATGTGA TAAAATGTGCA
M731	e209	nullT10W	e18	e431	AGTTTGTTTGT TTTTTTTTTT TGTGATGCTA ATTACGAGAGA
M732	e917	nullT10W	e211	e423	TTAGGGAATCT TTTTTTTTTT TGGGAAGTTT ATAGCAGGATA
M733	e913	nullT10W	e22	e226	AGATGTCAGAT TTTTTTTTTT TAGAGCGAAA AGAGTAGTGTT
M734	e1	nullT10W	e26	e341	TGGGAATATCT TTTTTTTTTT AGGTAACGTT AGGTTAGACAT
M735	e28	nullT10W	e3	e251	TTTCGGATAGA TTTTTTTTTT TCGAGAAGTT TAATAGTCGGA
M736	e65	e200	e698	e165	TGGCTATTAGA AATCGGAGTT ACGAGATTGA AGTGAACAAAA
M737	e646	e8	e127	e57	TTTAGTGGAGA TGGATCGATT TTGGAACGTA ATAGACAGGAA
M738	e467	e59	e46	e154	TGAGTATCTGT TTGTGGTGAT TAATGGCTGT AGAACTATGGT
M739	e97	e433	e223	e202	TGGTAGTAACT TGCTGTGTTA TGGTGCATAT AATTTTTCGGT
M740	e270	e23	e99	e504	AGGAAGGAATA TGGGTTCTTT AGCTGAAGTT AAGGTAGTCAT
M741	e168	e916	e272	e345	AGAGTTTAGGA TCGAATGGAA TCGTGAAAGA ACAGGAAGATA
M742	e385	e27	e293	e496	TATGGAGTTCT AAGAAAGGCT TTTGGGTACA ATATAGGACGT
M743	e344	e4	e387	e778	TAGGAACAGAA TTTGGGTGAT ATAACGTGGA TGTGACAGATA
M744	e659	e196	e159	e619	AGGACTAATGT TAGGCAATGA AGCTGTGATT AGAGAAGATGT
M745	nullT11S	e30	e661	e120	TTTTTTTTTTT TGTGTTGAGT TCTTGTTGGT ATGCAAAGATT
M746	e93	e68	e195	e85	AATAGGGTACA TGAAATGGGT ATGGTTGTCA TGGTATTCAGA
M747	e84	e128	e95	e74	AAGTTAGGGTA AAGCAGATGT AAGGGTCAAT TAATACGAGGA
M748	e279	e649	e86	e427	ACTTGTAGGAT AAGGTACGTT AAAGAAGGGT ATATAGAGGCA
M749	e852	e478	e281	e817	AGATGGAGATT TTCGGAGATT TGTGCAGTTA TATACGAAGGT
M750	e246	e396	e854	e729	TGTTGTTGATT TCGAGTGAAT AAGCGAGTTA AGAAAGGAAGA
M751	e548	e100	e248	e231	TAAGAGTGTGA TAAGCGTGAT AGTTCGGATT TAAGAAGGTCA
M752	e565	e273	e428	e541	ACGTTGATTTT AATGAGAGCT TGAGACGAAA TATTGAGGCTA
M753	e125	e294	e567	e398	TTATCTGTGGA TAAGGCATGA TTAGCGAGTT TTCTGTAGTGA
M754	e573	e388	e542	e590	ATTTGCTGATT AGTTCTGGTT TCAAGTTGGT AAGAAAAGCAA
M755	e148	e179	e665	e419	TGGACAAATTT AAGGAGGTTT TAAAGGTGCT AGATCTGAGTT
M756	e101	e96	e114	e42	TGGAAGAGTAT TGGCTGTAAT TTTGTAGGCT TCAAGAAGGTA
M757	e161	e87	e103	e190	AGGGTTCTAAT TAGTGGCAAT AGACTGGTTT TTTAAATGCGA
M758	e1352	e282	e473	e549	AGGATCTGATT TACGTTGTGA AGTGAGTTGT TTAAGGGAGAA
M759	e1384	e543	e726	e53	TGGTCATAGAT TACGTTGGAT ATCAAAGGGT AGTATTACGGA
M760	e84	e568	e587	e386	AAGTTAGGGTA AGCAGAAGAA AAGAGCAGTT AGAAGTAGACA
M761	e168	e808	e546	e288	AGAGTTTAGGA TGGACTTTGT TGACGTTGTA AAAGGCTAGTA
M762	e463	e666	e146	e239	AGAGTGATGAT TGAACTGGAA TGATGAAGCT ACAATGGAAAA
M763	nullT11S	e150	e54	e2014	TTTTTTTTTTT TTGGGTGTTA AGGAACAAGT TGAGGATTACA
M764	e133	e843	nullT10N	e276	TGTTTGAACTT TAGTGAACGT TTTTTTTTTT TAGTTAGTCGT
M765	e69	e115	e538	e109	ATGGGATTAGA AGCAAGGATT AGGTGAATGT TAGAGAATCGA
M766	e618	e104	e71	e102	TCGTAGTATGT TGGCAGTAAT ATTGAAGGGT AAATTGGAACA
M767	e630	e1387	e82	e320	TAGATGTACGT TAAGTGGCAT ATGGTGTCAA AATGTCTAGGA
M768	e172	e502	e632	e1257	TGGAGATACAT TGTTGGAACT TCGTGGTATT ATTGATGCAAA
M769	e430	e551	e174	e1237	ACTATGTGAGT TTGAGATCGT ATCTGGGTTT ATAGTCTTGGA
M770	e332	e359	e867	e742	TTTTGATTCGT TTAGCTTGGT TGTTAGCGAT ATGGTAGATCA
M771	e283	e171	e334	e757	ATGTGAGTAGT TGGTTTGCTA TCGTTATGGT AGGAAATAGGA
M772	e2059	e466	e285	e304	TGAGATTGGTA AAAGGTCGAT TGTGCGATAT AAGAGAGTGTA
M773	nullT10S	e2014	e2059	e2061	TTTTTTTTTT TGTAATCCTCA TACCAATCTCA ATCACATCGT
M774	e129	e72	e54	e394	ATACTGGATGA ACTGGTGATT AGGAACAAGT AAAAATGGACA
M775	e700	e621	e131	e45	ATTGCAATGAT AGCTTGTGTA TTTCGAGGTT TGAGGTATGAT
M776	e356	e596	e702	e729	ATGGTTTTGTT AACAGGTTGA AGGGATAGGA AGAAAGGAAGA
M777	e364	e83	e358	e222	AGGAGTAAACT TGTTGGGTAA TGTGATACGT AAAGAGAGGAA
M778	e784	e335	e771	e578	AGGTGAAGTAT AGTTGATGCT TGTACGGAAT TGAGTAGAACA
M779	e348	e286	e309	e365	TGGTAAGTACT TGTCGAGATT TTAGAGCGAA AGTTGGTAGTA
M780	nullT11S	e2061	e127	e60	TTTTTTTTTTT ACGATGTGAT TTGGAACGTA TAGGAAGACAA
M781	e597	e323	nullT10N	e464	TCGGAATTAGA ATAACGGTGA TTTTTTTTTT TTGTTGCATAA
M782	e438	e339	e628	e746	TAGTGGTTGTA AGCAGGATTT TAGAATGCGA TTAGAGTGTCT
M783	e756	e703	e747	e374	TATGGAGCTAT TTGAGTGTGT TCTTGGGTTT TGTAGGAATCT
M784	e161	e404	e43	e206	AGGGTTCTAAT TAAGGTGCAA ACGTGAAAGA AAAAGTTGTGT
M785	e557	e1276	e163	e386	TTCGAAATGTT AAGATGGCTT TAGATGCGAA AGAAGTAGACA
M786	e389	e429	e559	e1594	AGGGATTTAGT TTGTGGCTTA TGTTCAGGTT ATAGGTGACAT
M787	e450	e184	e391	e158	AGAGAATGAGT TTGGTCAGAA TATGGTTCGT ATTATCAGGGT
M788	e88	e351	e1574	e141	AGGGATGTAAT TGAAAGTCGA AAAGGGAGTT AATGTGGAAAA
M789	e108	e629	e510	e806	AGAATTAGGGA ATGGGAACTT AAGTGGTGAA TTAAGGAAGGT
M790	e581	e441	e3	e725	ACATATGGAGT ACGTGTATGT TCGAGAAGTT TAAGTGACTGA
M791	e712	e124	e893	nullT11E	TTAAGGACTGA TGGTATGCAT TTCGTGGTAA TTTTTTTTTTT
M792	e250	e572	e758	e845	ACTGAGGATAA TGTGTCAAGT ATGTGGATCA TTTTCGATTGT
M793	e708	e560	e215	nullT11E	AACTGATAGGA AGTCGGATTT AATGGTGGAT TTTTTTTTTTT
M794	e777	e1575	e734	e130	AGTGGATCTTA TTTGTGGGTA AGCAAGAGAA AATAGTCTGGT
M795	e833	e167	nullT10N	e798	AACAGAGAGAT TTGGCTATGA TTTTTTTTTT AGAGTGGATAA
M796	e193	e776	e835	e21	TATATGGTCGT TGTCTGTGTT ATGGTCGAAT TTTCATAGGGA
M797	e277	e345	nullT11N	e2209	TCACCCATTT TATCTTCCTGT TTTTTTTTTTT TACCACAACA
M798	e65	e188	nullT10N	e2220	TGGCTATTAGA AAGGTTCGAT TTTTTTTTTT TTAGTCTTGGA
M799	e189	e735	e730	e218	AGTTGATAGGT ATCGAGTGTT TAGTTGCGAT TCTTAGAAGGT
M800	e364	e780	e191	e525	AGGAGTAAACT AGTGGAATGT TCGGTGTAAA ATAGGACATGA
M801	e792	e836	e827	e566	AGGGATTCATA ATGTATGGCT TGCGAGAATA TTAAAGAGGGA
M802	e1076	e494	e440	e639	AGGAAGATTCT TTGTAGCGAT AGGCAGTAAA AGGTTTAGGTA
M803	e524	e2209	nullT10N	e1184	TATGACAGAGT TGTTGTGGTA TTTTTTTTTT ACTTGGTAGAT
M804	e829	e359	e526	e29	AGGATGTACTT TTAGCTTGGT TGTTGATCGA TTAGTAGGTGT
M805	e2249	e318	e831	e451	TGTGGAGATAT TGTGTCTTGA TAAAGCTGGT TAGTTGTGAGA
M806	nullT10S	e462	e2249	e2251	TTTTTTTTTT TCCATAACTCT ATATCTCCACA TCACTTGTCA
M807	e2252	e2220	nullT11N	e2253	AACAACTCGA TCCAAGACTAA TTTTTTTTTTT TTACAGCCTT
M808	e262	e731	e2252	e853	TAGTCAGTTGA ATTGGACGAT TCGAGTTGTT TAGGTTTCAGA
M809	e610	e828	nullT10N	e62	ATGAAAATGCT AGTATGCTGT TTTTTTTTTT TCGAGAGATAA
M810	nullT10S	e841	e475	e2273	TTTTTTTTTT ATCTGCAAAAT TATCATCGACT ATCACACGAT
M811	e56	e527	e1230	e1036	AGTAGTGAAGT TTGAGCGATA TGAAGAGCTT AATCGGAAAAA
M812	nullT11S	e2251	e436	e1313	TTTTTTTTTTT TGACAAGTGA TTAGTCGTGT ACTAAAGGAGT
M813	e475	e2253	nullT10N	e2	AGTCGATGATA AAGGCTGTAA TTTTTTTTTT TTCATGTTGTT
M814	e1236	e265	e289	e259	AAGAGGTAGAA AAGACGGAAA TCTTGTGTGT ATGTAGTAGCA
M815	e884	e502	e1238	e296	TGATAGGACTT TGTTGGAACT AGACATGGTT TGGAGACTAAT
M816	e589	e613	e91	e983	AGTAGTGACAT AGGTTTGTGA AAGTGGACAT AGTAATCAGGA
M817	e532	e686	e591	e329	AGTCTAAAGGA AGTGCAGAAT TTTGAGTGGA TTTCATTTGGT
M818	nullT11S	e2273	e534	e462	TTTTTTTTTTT ATCGTGTGAT AAATTGCGTT AGAGTTATGGA
M819	e1260	e323	nullT10N	e2308	AGAAGTACAGA ATAACGGTGA TTTTTTTTTT ATTCGAGTAGT
M820	e837	e59	e1262	e733	AGGTATGGAAT TTGTGGTGAT TTCAAAGGGT TGAGAGAAAGA
M821	e1341	e506	e313	e398	TTGACATTGTT AGAGTGCTTT TGATGATCGT TTCTGTAGTGA
M822	e303	e815	e31	e190	ATGTAGGGTAA ATTTGCGTTT ATCGGTGTAA TTTAAATGCGA
M823	e324	e1239	e86	e231	TTAGGTAGCAT ATCATTGGGT AAAGAAGGGT TAAGAAGGTCA
M824	e1027	e92	nullT10N	e738	TTATTTTGCGT ATTGGATCGA TTTTTTTTTT AGTGTAAGAGA
M825	e153	e19	e375	e365	TAGAGGAAAGT TTGTGCTAGT ATGAGGTGTT AGTTGGTAGTA
M826	e653	e2308	nullT11N	e2341	ACCTTCAGTT ACTACTCGAAT TTTTTTTTTTT AACAATCCCT
M827	e651	e840	e142	e194	TTCGGATAGAA AGCTGAGAAT AGAAGACGTT AGAGTTAGGAA
M828	nullT11S	e150	e653	e105	TTTTTTTTTTT TTGGGTGTTA AACTGAAGGT ATTTTTGACGT
M829	e234	e32	nullT10N	e122	AGAACAGAGTA AGTTTGGTGA TTTTTTTTTT AGTAGGAAGAA
M830	e275	e306	e236	e476	AGAGATGACTT TTTGGATGGT TGGATGTCAA ATGAGTTAGGT
M831	e73	e343	e277	e109	AGTAGACTGAA AGAGCGTAAT AAATGGGTGA TAGAGAATCGA
M832	nullT11S	e509	e411	e368	TTTTTTTTTTT AGGTTGGAAT TGTAGGCAAT AGAATCAGGAT
M833	e328	e2341	nullT10N	e2374	AATGCAGATTT AGGGATTGTT TTTTTTTTTT ATCGGTAGTAA
M834	e238	e763	e330	e480	TTGAGAGTAGT AGTGATCGAA TTTGGAGTGT ACAATTGGAAA
M835	e520	e237	e151	e214	AGGGTTAGAAT TTAGGCAAGT TCATGGATGT AGATTATCGGA
M836	e136	e265	e178	e1049	AGAACTAAGGA AAGACGGAAA TAATGGAGCA AGTACGAGTAT
M837	nullT11S	e75	e138	e713	TTTTTTTTTTT TGAGTGCATA TTGTTGGCTA AGAATATGGGT
M838	e136	e768	nullT10N	e2396	AGAACTAAGGA TGGAAGGAAA TTTTTTTTTT TGTTTGATGTT
M839	e181	e380	e223	e623	AGCTTAGATGA TGTTGGTCTT TGGTGCATAT ATTAGTCTGGA
M840	e270	e412	e183	e598	AGGAAGGAATA ATGAAGACGA AGAAGCAAGA AGATAGCGTAT
M841	e2406	e2374	nullT11N	e32	AACAGAACCT TTACTACCGAT TTTTTTTTTTT TCACCAAACT
M842	e857	e331	e2406	e316	ATCTTAGGGAA AAGGGACAAT AGGTTCTGTT AAAATGCAAGA
M843	e88	e241	e859	e94	AGGGATGTAAT ATGTAGCAGT TGACTGGAAA AGGATATAGCA
M844	nullT11S	e135	e799	e180	TTTTTTTTTTT TGCAGAAGAT TTGTGTAGCA ACTTTAGAGGT
M845	e258	e152	nullT10N	e370	AACGTGAAATT AAGGGTGAAT TTTTTTTTTT AAAAGTGAACA
M846	e1093	e4	e260	e267	AGGTACGATTA TTTGGGTGAT AAGGCTGATT TAGGGATGAAA
M847	e481	e2396	nullT11N	e2429	TCAGCATCTT AACATCAAACA TTTTTTTTTTT ACCCATGAAA
M848	e1060	e184	e669	e705	TAGAGATGCTT TTGGTCAGAA TGTTCGTGTA TGCATATAGGT
M849	nullT11S	e415	e240	e796	TTTTTTTTTTT AGATGACGTT AAGGAATCGA ATTACAGAGGT
M850	e121	e763	e289	e263	AAGTACTGAGA AGTGATCGAA TCTTGTGTGT TTAGTTCAGGA
M851	e225	e204	e123	e49	AAGTCGAGTAT ATGATGGTGT TTATGGCAGT ATTAGTGGGTA
M852	nullT11S	e751	e114	e2460	TTTTTTTTTTT TTTGGGTTCT TTTGTAGGCT TGATAGTGCTA
M853	e172	e2429	nullT10N	e464	TGGAGATACAT TTTCATGGGT TTTTTTTTTT TTGTTGCATAA
M854	e741	e670	e232	e643	TCGGTAGATTA TTTTCTGGGA TATTGCGAGT AGAGTTGAGTA
M855	e307	e363	e106	e1516	TAGAAGGCATA TGGCTGTTAA ATGTCGGTAA ATCAAGGTAGA
M856	nullT11S	e227	e78	e650	TTTTTTTTTTT AGTTGGTTCA TGGATATGCA ATAGGACAAGT
M857	e479	e314	e1082	e117	ATGGATTAGGA TTGTCAGGAA ACGATGGAAT TAGGGTAACAT
M858	e2491	e449	e481	e81	AGATAGTGGTT TCTGTTTGGT AAGATGCTGA AAAATTAGCGT
M859	nullT10S	e2460	e2491	e2493	TTTTTTTTTT TAGCACTATCA AACCACTATCT TGCTAACCAT
M860	e157	e204	e620	e963	ACAGTAGGATT ATGATGGTGT AAAGTGGTCT TTTGTCAATGT
M861	nullT11S	e826	e1789	e274	TTTTTTTTTTT AGTCGTTTGA TGCAGTAAGT ATTGAAGCAAA
M862	e161	e107	nullT10N	e17	AGGGTTCTAAT TTCGATGGAT TTTTTTTTTT AGGAGTTTACT
M863	e125	e310	e1562	e34	TTATCTGTGGA TGTAAGTGCT TCGGTATGTT AGCTAGTGTTA
M864	e695	e79	e648	e198	AGTTGTAGTCT TGGTTGCTAA TATTGGTCGT ATGATTGCAAT
M865	e2516	e137	nullT11N	e2517	AACTCCAACT TCCTCATAGTT TTTTTTTTTTT TACCAATGCA
M866	e801	e527	e2516	e126	AAGTGAGGATA TTGAGCGATA AGTTGGAGTT AGACTTAGGAA
M867	nullT11S	e2493	e110	e556	TTTTTTTTTTT ATGGTTAGCA AAGGTTCAGT ATCAGGATGTA
M868	e737	e253	nullT10N	e137	AGTCTAAAGGT TGGTTCTTGA TTTTTTTTTT AACTATGAGGA
M869	e1007	e494	e739	e186	AGCAGGTATTA TTGTAGCGAT AGTTCGTGAA TGGAGTAAGAT
M870	e319	e1790	e624	e834	TAAAATTGGCA ATGCTGAAGA TTATGCTGGT TATTCGAGGTA
M871	e61	e1563	e46	e660	TTGAGGGATAT ACGGATGAAT TAATGGCTGT TAAAACGTGTT
M872	nullT11S	e697	e244	e781	TTTTTTTTTTT TTGGGTTTCT TTATGGACGT TTGACGAAAAT
M873	e153	e2517	nullT10N	e2550	TAGAGGAAAGT TGCATTGGTA TTTTTTTTTT AGGAGAATTCT
M874	e548	e111	e518	e42	TAAGAGTGTGA TGTTACGAGT TGATGTCGAT TCAAGAAGGTA
M875	e573	e740	e166	e541	ATTTGCTGATT TACGTTGAGT TGTTCTGTGT TATTGAGGCTA
M876	e861	e139	e575	e255	AGGAGTGTATT AAGAAGTCGA TTGAGCTGAA TATAGACGTGT
M877	nullT11S	e321	e863	e736	TTTTTTTTTTT AGCTGATTGA ACGGAGAAAT AGGTCATTAGT
M878	e704	e47	nullT10N	e2572	AGGTAATGGTA ACGAGTTGAA TTTTTTTTTT TAGCTGAGTAA
M879	e844	e64	e99	e406	TTTGACTGTTT ATGATGAGCA AGCTGAAGTT TTTACTGGGTA
M880	e809	e87	e58	e631	AGTATGTCTGA TAGTGGCAAT ATGCGTAGAA TTAGAGTGACA
M881	e2582	e2550	nullT11N	e2583	TGCCAACTTA AGAATTCTCCT TTTTTTTTTTT TAGCATCCAA
M882	e37	e156	e2582	e537	AAGGGATTAGT TGTCGTTAGT TAAGTTGGCA AGGAGCATATA
M883	e381	e519	e39	e117	AGGAGTTACTT TGTTGTCAGA TTCGGAGTTT TAGGGTAACAT
M884	nullT11S	e603	e383	e45	TTTTTTTTTTT AGTTGATCGT TAGAAAGCGA TGAGGTATGAT
M885	e532	e167	nullT10N	e182	AGTCTAAAGGA TTGGCTATGA TTTTTTTTTT AGAGCTATGAT
M886	e299	e576	e1757	e390	ATGGATGTCTA AGGCTGAAAT TTTTGAGGGT AAAGCATTGAT
M887	e764	e864	e301	e821	TTTTTGTCTGT AACTTGTGGA TCTGTTGGAA AGGTCTTGATA
M888	e2604	e2572	nullT11N	e32	TGCTACAACT TTACTCAGCTA TTTTTTTTTTT TCACCAAACT
M889	e450	e707	e2604	e598	AGAGAATGAGT TTGGCAGTTA AGTTGTAGCA AGATAGCGTAT
M890	e528	e847	e187	e25	AGACTAATGGA TTGGCTTGTA TCTTTGGGAA TGTGATAGACA
M891	nullT11S	e811	e534	e2614	TTTTTTTTTTT AGGTGTCTTT AAATTGCGTT TGATTTGTTGT
M892	e76	e2583	nullT10N	e370	TGAGGACTATT TTGGATGCTA TTTTTTTTTT AAAAGTGAACA
M893	e144	e40	e440	e789	AGTGATTAGGA TGTGGTACAA AGGCAGTAAA TAGAGGAACAT
M894	e434	e327	e110	e785	TAGCATGAGTA TTGGTGGTAA AAGGTTCAGT ATGACAGTAGT
M895	e467	e302	e436	e169	TGAGTATCTGT ATGGGTTGAA TTAGTCGTGT AGATCAGTGTA
M896	e52	e12	e155	e145	TGGCAAAATAA AGGAACGATT AAAGAGGGTT AGGTTCTAGTT
M897	nullT10S	e2614	e324	e2647	TTTTTTTTTT ACAACAAATCA ATGCTACCTAA ACACTTCCAA
M898	e816	e791	e416	e1492	TGGGATCTATT TGTGTCATGA AAGGGAACAA TTTAGGACGTA
M899	e614	e147	e818	e1233	AAAAGGGTCTA AGTAGTGCAT ATGACGTGTA TTTTGCATGAT
M900	nullT11S	e1737	e616	e841	TTTTTTTTTTT TGTGATTGGA AGGTGCTTAA ATTTTGCAGAT
M901	e503	e229	nullT10N	e873	AGTAGATACGT AGGAGGTAGA TTTTTTTTTT AGGCTAAGTAT
M902	e213	e224	e814	e325	TTCTATGTGGA ATTGGGTCAT AATCAGTGGT ATAGTGAGGAA
M903	e708	e645	e782	e235	AACTGATAGGA ATGTGGTCTT ATGACATGGT TCTGGGATTAT
M904	e606	e55	e63	e271	AGACGGTAATA AAGAAGTGGT TGTGTACGAA TGAAGTAAGGA
M905	nullT11S	e2647	e608	e2680	TTTTTTTTTTT TTGGAAGTGT TTGGACGTAA TCAAAATGTGT
M906	e1536	e417	nullT10N	e858	AGTGTGAGATA TTCGGAAGAT TTTTTTTTTT AGAGTAAGGTT
M907	e250	e819	e1538	e419	ACTGAGGATAA TTGAGTCGAT TATGTGTCGT AGATCTGAGTT
M908	e712	e815	e716	nullT11E	TTAAGGACTGA ATTTGCGTTT AACTGTGTGA TTTTTTTTTTT
M909	e1816	e216	e714	nullT11E	TTGCGATAAAA AGAGCAATGA AGTAGCGAAT TTTTTTTTTTT
M910	e897	e253	nullT10N	nullT11E	ATTCGTAGAGA TGGTTCTTGA TTTTTTTTTT TTTTTTTTTTT
M911	e715	e347	e898	nullT11E	TGAGGATGTTA AAATGAGGCT TGCATGAGAT TTTTTTTTTTT
M912	e2701	e551	e716	nullT11E	AGGTTAAGACT TTGAGATCGT AACTGTGTGA TTTTTTTTTTT
M913	nullT10S	e2680	e2701	nullT10E	TTTTTTTTTT ACACATTTTGA AGTCTTAACCT TTTTTTTTTT
M914	e719	e376	e887	nullT11E	AAAGAGGAGAT TGATATGGCA ATCGGATTGT TTTTTTTTTTT
M915	e185	e1272	e720	nullT11E	TTAGGATGACA TGTGCAGATA TTTCGATGGA TTTTTTTTTTT
M916	nullT11S	e90	e887	nullT11E	TTTTTTTTTTT TACGGTGAAT ATCGGATTGT TTTTTTTTTTT

## Sheet: (b) Tile locations
H0	S1	N2	S3	H4	N5	H6	H7	.	.	.	.	.	.	.	.	H8	S9	N10	S11	H12	S13	H14	S15		A480	A481	N10	S13	A482	N5	A483	I484	A485	I486	A487	S3	I488	S11	A489	A490	I491	S109	I492	I493	A494	S9	A495	S15
S16	B17	N18	H19	S20	N21	N22	H23	.	.	.	.	.	.	.	.	S24	B25	N26	H27	B28	H29	S30	H31		S120	I496	I497	I498	S301	A499	N351	A500	S345	I501	S303	A502	S126	A503	N115	A504	S213	A505	N251	A506	S305	A507	N282	A508
B32	S33	B34	S35	H36	S37	B38	S39	.	.	.	.	.	.	.	.	H40	S41	H42	S43	H44	S45	N46	S47		A509	S434	A510	S412	N229	S45	A511	I512	I513	S247	N308	S324	A514	N218	I515	S395	A516	I517	A518	S436	A519	S332	I520	I521
S48	B49	S50	H51	S52	H53	S54	H55	.	.	.	.	.	.	.	.	S56	H57	S58	H59	B60	B61	N62	H63		S80	N206	S50	A522	S188	N152	S90	I523	S54	A524	I525	I526	S278	A527	S451	A528	S222	A529	I530	A531	I532	A533	S382	A534
H64	S65	H66	S67	H68	S69	H70	B71	.	.	.	.	.	.	.	.	H72	S73	H74	N75	H76	S77	H78	B79		A535	S337	A536	I537	I538	S73	A539	S35	A540	S364	A541	N134	A542	S289	A543	S341	A544	S172	A545	N22	N296	S421	A546	S167
S80	H81	S82	H83	N84	N85	S86	B87	.	.	.	.	.	.	.	.	S88	H89	S90	B91	S92	H93	N94	N95		S24	A547	S343	A548	N207	A549	S457	A550	S203	A551	S410	A552	S406	A553	S138	A554	N62	A555	N309	A556	S124	A557	S314	A558
H96	B97	H98	B99	B100	B101	H102	B103	H104	S105	H106	N107	H108	S109	H110	S111	H112	S113	H114	N115	N116	S117	H118	B119		A559	S30	A560	S130	A561	I562	I563	N165	A564	S284	I565	S161	A566	S397	N169	S178	A567	S276	N350	S43	I568	N257	A569	S431
S120	N121	B122	H123	S124	H125	S126	H127	S128	H129	S130	N131	S132	B133	N134	B135	S136	H137	S138	H139	N140	N141	S142	H143		I570	A571	S385	A572	I573	A574	S293	A575	S476	A576	S466	I577	S474	N465	S368	A578	S186	A579	S241	A580	I581	A582	S132	A583
H144	S145	H146	S147	H148	S149	H150	N151	N152	S153	H154	N155	H156	S157	H158	S159	H160	S161	H162	B163	H164	N165	S166	S167		N192	I584	A585	I586	A587	S297	A588	S359	.	.	.	.	.	.	.	.	A589	I590	A591	N170	I592	S174	A593	S263
B168	N169	N170	H171	S172	H173	S174	H175	S176	B177	S178	B179	S180	H181	S182	N183	N184	H185	S186	H187	S188	N189	B190	H191		I594	A595	N151	A596	S234	A597	S249	A598	.	.	.	.	.	.	.	.	S312	N233	S322	A599	S366	I600	N255	I601
N192	N193	N194	S195	H196	S197	H198	S199	H200	B201	H202	S203	H204	N205	N206	N207	H208	N209	H210	N211	H212	S213	H214	S215		I602	S145	I603	N220	N21	S128	A604	I605	.	.	.	.	.	.	.	.	N424	S261	A606	S149	A607	I608	N379	S455
S216	H217	N218	H219	N220	H221	S222	H223	S224	H225	S226	H227	S228	N229	B230	H231	S232	N233	S234	B235	N236	H237	N238	B239		S440	A609	S449	A610	S199	A611	S270	N95	.	.	.	.	.	.	.	.	S408	A612	S20	A613	S402	A614	I615	A616
H240	S241	N242	S243	N244	S245	H246	S247	H248	S249	B250	N251	H252	N253	H254	N255	H256	N257	H258	S259	H260	S261	N262	S263		A617	S459	A618	S226	N262	S82	N116	S197	N2	N107	A619	S1	A620	S111	A621	S105	I622	N140	A623	S58	N121	S92	A624	S391
S264	H265	N266	B267	S268	B269	S270	H271	S272	N273	N274	N275	S276	H277	S278	N279	S280	H281	N282	N283	S284	H285	N286	H287		S216	A625	S33	A626	N75	I627	S291	A628	N339	N273	S349	A629	S159	N46	S417	A630	S228	A631	S318	A632	S259	A633	S376	A634
N288	S289	H290	S291	H292	S293	H294	B295	N296	S297	H298	B299	B300	S301	H302	S303	H304	S305	H306	S307	N308	N309	H310	S311		A635	S37	A636	S272	A637	S195	A638	N238	A639	S453	A640	S65	A641	N211	N131	N193	A642	S153	A643	S147	A644	S461	N189	I645
S312	H313	S314	H315	S316	H317	S318	H319	B320	H321	S322	H323	S324	H325	S326	H327	S328	H329	N330	H331	S332	H333	S334	H335		S432	A646	S245	A647	I648	A649	S280	A650	S326	A651	S232	A652	S182	A653	S180	N85	I654	A655	S353	I656	N18	A657	I658	A659
H336	S337	B338	N339	H340	S341	H342	S343	H344	S345	H346	N347	H348	S349	N350	N351	H352	S353	H354	S355	H356	N357	H358	S359		A660	S243	A661	S404	I662	S113	A663	N94	A664	S142	A665	S442	I666	S425	I667	N84	A668	N184	A669	N429	A670	S316	A671	I672
B360	H361	B362	H363	S364	N365	S366	H367	S368	H369	S370	H371	N372	H373	S374	H375	S376	H377	N378	N379	B380	H381	S382	B383		S16	A673	S41	A674	S446	A675	S52	N365	I676	A677	N372	A678	N478	N477	N468	A679	S438	S166	N357	I680	N253	A681	N286	I682
H384	S385	H386	B387	H388	S389	B390	S391	.	.	.	.	.	.	.	.	B392	S393	H394	S395	H396	S397	H398	S399		I683	S389	A684	S157	I685	S444	A686	S39	.	.	.	.	.	.	.	.	A687	N205	A688	N209	A689	N236	N141	S215
B400	H401	S402	B403	S404	H405	S406	H407	.	.	.	.	.	.	.	.	S408	H409	S410	B411	S412	H413	S414	H415		S88	A690	S393	A691	N274	A692	N330	I693	.	.	.	.	.	.	.	.	S56	A694	N155	A695	S355	I696	N266	A697
H416	S417	H418	B419	H420	S421	H422	B423	.	.	.	.	.	.	.	.	N424	S425	H426	B427	H428	N429	H430	S431		N288	N347	N279	S67	N183	N378	A698	I699	.	.	.	.	.	.	.	.	A700	N26	A701	S307	A702	S69	I703	S47
S432	H433	S434	H435	S436	H437	S438	H439	.	.	.	.	.	.	.	.	S440	H441	S442	H443	S444	H445	S446	H447		S264	N275	I704	A705	S117	N244	S86	A706	.	.	.	.	.	.	.	.	S48	A707	S334	A708	S136	A709	S414	A710
H448	S449	H450	S451	H452	S453	H454	S455	.	.	.	.	.	.	.	.	H456	S457	B458	S459	B460	S461	H462	B463		A711	S224	N194	I712	A713	S77	A714	S399	.	.	.	.	.	.	.	.	A715	S268	A716	S176	N242	S328	N283	S311
S464	N465	S466	H467	N468	H469	S470	B471	.	.	.	.	.	.	.	.	S472	N473	S474	H475	S476	N477	N478	H479		S464	A717	S470	A718	I719	A720	S374	A721	.	.	.	.	.	.	.	.	S472	A722	A723	A724	S370	N473	A725	A726
[truncated: 24 more columns]
