# Supplementary material for: Pattern recognition in the nucleation kinetics of non-equilibrium self-assembly
Source: Nature. 2024 Jan 17;625(7995):500–7. doi: 10.1038/s41586-023-06890-z (PMC10794147; doi:10.1038/s41586-023-06890-z)
Supplement: Supplementary file 4 — Source Data Fig. 4 [file 41586_2023_6890_MOESM4_ESM.xlsx]

## Sheet: (c) Norm. fl. for ramp
time (s)	protocol temperature (°C)	DevT (°C) H flag 1,4flH, red (ROX)	Fl H flag 1,4flH, red (ROX)	DevT (°C) H flag 1,4flH, green (FAM)	Fl H flag 1,4flH, green (FAM)	DevT (°C) H flag 1,4flH, orange (ATTO 550)	Fl H flag 1,4flH, orange (ATTO 550)	DevT (°C) H flag 1,4flH, blue (ATTO 647N)	Fl H flag 1,4flH, blue (ATTO 647N)	DevT (°C) H flag 1,4flA, red (ROX)	Fl H flag 1,4flA, red (ROX)	DevT (°C) H flag 1,4flA, green (FAM)	Fl H flag 1,4flA, green (FAM)	DevT (°C) H flag 1,4flA, orange (ATTO 550)	Fl H flag 1,4flA, orange (ATTO 550)	DevT (°C) H flag 1,4flA, blue (ATTO 647N)	Fl H flag 1,4flA, blue (ATTO 647N)	DevT (°C) H flag 1,4flM, red (ROX)	Fl H flag 1,4flM, red (ROX)	DevT (°C) H flag 1,4flM, green (FAM)	Fl H flag 1,4flM, green (FAM)	DevT (°C) H flag 1,4flM, orange (ATTO 550)	Fl H flag 1,4flM, orange (ATTO 550)	DevT (°C) H flag 1,4flM, blue (ATTO 647N)	Fl H flag 1,4flM, blue (ATTO 647N)	DevT (°C) H flag 1,1flEa, red (ROX)	Fl H flag 1,1flEa, red (ROX)	DevT (°C) H flag 1,1flEa, orange (ATTO 550)	Fl H flag 1,1flEa, orange (ATTO 550)	DevT (°C) H flag 1,1flEa, blue (ATTO 647N)	Fl H flag 1,1flEa, blue (ATTO 647N)	DevT (°C) H flag 2,4flH, red (ROX)	Fl H flag 2,4flH, red (ROX)	DevT (°C) H flag 2,4flH, green (FAM)	Fl H flag 2,4flH, green (FAM)	DevT (°C) H flag 2,4flH, orange (ATTO 550)	Fl H flag 2,4flH, orange (ATTO 550)	DevT (°C) H flag 2,4flH, blue (ATTO 647N)	Fl H flag 2,4flH, blue (ATTO 647N)	DevT (°C) H flag 2,4flA, red (ROX)	Fl H flag 2,4flA, red (ROX)	DevT (°C) H flag 2,4flA, green (FAM)	Fl H flag 2,4flA, green (FAM)	DevT (°C) H flag 2,4flA, orange (ATTO 550)	Fl H flag 2,4flA, orange (ATTO 550)	DevT (°C) H flag 2,4flA, blue (ATTO 647N)	Fl H flag 2,4flA, blue (ATTO 647N)	DevT (°C) H flag 2,4flM, red (ROX)	Fl H flag 2,4flM, red (ROX)
3120	53	52.7	0.958303	52.7	0.913153	52.8	0.960586	52.7	0.969207	52.7	0.946942	52.7	0.922196	52.8	0.919455	52.8	0.92541	52.7	0.970962	52.7	0.892092	52.8	0.951729	52.8	0.935492	52.7	0.951719	52.7	0.905762	52.8	0.919297	52.7	0.948677	52.7	0.906058	52.7	0.940765	52.8	0.964306	52.7	0.941699	52.7	0.915312	52.7	0.907554	52.7	0.93155	52.8	0.97257
3840	52.8	52.7	0.976194	52.7	0.924061	52.7	0.974963	52.7	0.978162	52.7	0.961324	52.7	0.934509	52.7	0.934944	52.7	0.93803	52.7	0.980036	52.7	0.897963	52.7	0.956901	52.7	0.953322	52.7	0.965408	52.7	0.917467	52.7	0.930361	52.7	0.961524	52.7	0.91157	52.7	0.954954	52.7	0.972393	52.7	0.966831	52.7	0.927263	52.7	0.926842	52.7	0.944162	52.7	0.969746
4560	52.6	52.5	0.980283	52.5	0.932662	52.5	0.986353	52.5	0.983975	52.5	0.976743	52.3	0.93797	52.5	0.931885	52.5	0.94952	52.5	0.981246	52.3	0.915282	52.3	0.955931	52.5	0.957275	52.5	0.968573	52.5	0.928014	52.5	0.936978	52.5	0.973035	52.5	0.923407	52.5	0.963211	52.5	0.979364	52.5	0.96725	52.5	0.936605	52.5	0.939243	52.3	0.954333	52.5	0.977209
5280	52.4	52.2	0.984811	52.2	0.937627	52.2	0.993724	52.2	0.986567	52.2	0.972013	52.2	0.937704	52.2	0.943696	52.2	0.953664	52.2	0.987699	52.2	0.927376	52.2	0.960349	52.2	0.959462	52.2	0.97792	52.2	0.930329	52.2	0.945113	52.2	0.980031	52.2	0.93008	52.2	0.966055	52.2	0.981316	52.2	0.974028	52.2	0.945038	52.2	0.946324	52.2	0.960435	52.2	0.975192
6000	52.2	52.1	0.983789	52.1	0.947836	52.1	0.996846	52.1	0.987038	52.2	0.98063	52.1	0.951148	52.1	0.953183	52.1	0.957525	52.1	0.983464	52.1	0.926848	52.1	0.971016	52.1	0.961901	52.1	0.977626	52.1	0.93556	52.1	0.944137	52.1	0.985055	52.1	0.940699	52.1	0.97789	52.1	0.983547	52.1	0.977327	52.2	0.946797	52.1	0.950354	52.1	0.967352	52.1	0.979024
6720	52	52	0.984154	51.8	0.9349	51.8	0.993492	51.8	0.993166	52	0.978816	52	0.948819	51.8	0.955623	51.8	0.970616	52	0.987094	52	0.935243	51.8	0.975972	51.8	0.966358	52	0.979539	51.8	0.935003	52	0.949669	51.8	0.989634	52	0.933794	51.8	0.972966	51.8	0.991007	51.8	0.983625	51.8	0.952439	51.8	0.955479	51.8	0.972437	51.8	0.980436
7440	51.8	51.7	0.989265	51.7	0.950423	51.7	1	51.7	0.987274	51.7	0.982638	51.7	0.950815	51.7	0.953493	51.7	0.963458	51.7	0.988506	51.7	0.929255	51.7	0.97177	51.7	0.970395	51.7	0.982778	51.7	0.937747	51.7	0.952706	51.7	0.991542	51.7	0.944644	51.7	0.983609	51.7	0.988706	51.7	0.981946	51.7	0.964936	51.7	0.958648	51.7	0.971013	51.7	0.981848
8160	51.6	51.5	0.987221	51.6	0.954898	51.6	0.986884	51.6	0.988767	51.6	0.980176	51.6	0.950749	51.5	0.952021	51.6	0.960539	51.5	0.989111	51.6	0.936241	51.5	0.977481	51.6	0.972077	51.5	0.979024	51.5	0.944178	51.5	0.960299	51.5	0.993767	51.5	0.944006	51.6	0.982018	51.5	0.987939	51.5	0.983625	51.5	0.956079	51.5	0.960056	51.6	0.979251	51.6	0.981444
8880	51.4	51.3	0.991091	51.2	0.958045	51.3	0.998738	51.2	0.991595	51.2	0.981472	51.2	0.952146	51.2	0.957907	51.2	0.967979	51.2	0.987296	51.2	0.936241	51.2	0.979097	51.3	0.974012	51.2	0.983146	51.2	0.940405	51.2	0.957805	51.3	0.99205	51.3	0.94447	51.2	0.980153	51.2	0.986824	51.3	0.985245	51.3	0.958081	51.3	0.970267	51.2	0.972742	51.3	0.983259
9600	51.2	51.2	0.987513	51.2	0.945668	51.1	0.991732	51.1	0.991438	51.2	0.98361	51.1	0.953478	51.1	0.963213	51.1	0.973253	51.2	0.990522	51.1	0.942523	51.2	0.978558	51.1	0.97418	51.2	0.984986	51.2	0.945078	51.2	0.954984	51.2	0.99364	51.1	0.949228	51.2	0.993272	51.2	0.991425	51.2	0.993462	51.2	0.968697	51.2	0.97238	51.2	0.977522	51.1	0.981444
10320	51	50.8	0.987878	50.8	0.952521	50.8	0.994621	51	0.992694	51	0.984711	51	0.965258	50.8	0.956475	51	0.981541	51	0.987901	50.8	0.945635	51	0.97705	51	0.977292	51	0.988371	51	0.949408	51	0.951839	51	0.994976	51	0.960137	51	0.983945	51	0.98522	51	0.992143	51	0.968394	50.8	0.969172	50.8	0.984235	51	0.986688
11040	50.8	50.7	0.990799	50.7	0.961401	50.7	0.996314	50.7	0.991359	50.7	0.992291	50.7	0.964725	50.7	0.964413	50.7	0.980505	50.7	0.990119	50.7	0.947514	50.7	0.98136	50.7	0.976283	50.7	0.985059	50.7	0.95018	50.7	0.958998	50.7	0.995739	50.7	0.957874	50.7	0.987829	50.7	0.988148	50.7	0.985305	50.7	0.967666	50.7	0.974492	50.7	0.985049	50.7	0.985881
11760	50.6	50.5	0.992551	50.5	0.942312	50.5	0.980575	50.5	0.993873	50.5	0.989181	50.5	0.961664	50.6	0.967162	50.5	0.964588	50.6	0.991934	50.6	0.947044	50.5	0.982868	50.5	0.974937	50.6	0.985722	50.6	0.951123	50.6	0.962794	50.6	1	50.6	0.964025	50.6	0.982813	50.6	0.982501	50.6	0.989563	50.6	0.966816	50.6	0.97238	50.5	0.997356	50.6	0.98689
12480	50.4	50.3	0.989411	50.2	0.959863	50.2	0.989972	50.3	0.991987	50.3	0.984387	50.2	0.972446	50.3	0.96662	50.3	0.986909	50.2	0.991531	50.3	0.956144	50.2	0.971447	50.3	0.980824	50.2	0.987562	50.2	0.95674	50.2	0.966808	50.2	0.99205	50.3	0.965823	50.2	0.982844	50.2	0.987521	50.2	0.989623	50.3	0.961174	50.2	0.976801	50.2	0.98098	50.2	0.987092
13200	50.2	50.2	0.995107	50.2	0.958395	50.2	0.984693	50.1	0.993637	50.2	0.986914	50.1	0.964992	50.1	0.970338	50.2	0.986909	50.2	0.995765	50.1	0.951682	50.1	0.974464	50.2	0.982422	50.2	0.987562	50.2	0.953782	50.2	0.965072	50.2	0.996947	50.1	0.965881	50.2	0.980673	50.2	0.989752	50.1	0.994122	50.2	0.970153	50.2	0.980361	50.1	0.989219	50.1	0.986486
13920	50	49.8	0.993136	50	0.96252	50	0.982833	50	0.994344	49.8	0.981861	50	0.962795	50	0.972313	49.8	0.984837	49.8	0.992539	50	0.956144	50	0.971663	49.8	0.983347	49.8	0.984029	50	0.959484	49.8	0.962469	49.8	0.996439	49.8	0.971568	50	0.986453	49.8	0.990449	50	0.989383	50	0.973429	49.8	0.979735	50	0.993897	49.8	0.98447
14640	49.8	49.7	0.991529	49.7	0.957066	49.7	0.984228	49.7	0.992537	49.7	0.979852	49.7	0.966057	49.7	0.970531	49.7	0.974666	49.7	0.991127	49.7	0.959138	49.7	0.993535	49.7	0.985282	49.7	0.98793	49.7	0.960813	49.7	0.973099	49.7	0.995167	49.7	0.977718	49.7	0.993486	49.7	0.985569	49.7	0.988844	49.7	0.969607	49.7	0.98173	49.7	0.993999	49.7	0.989109
15360	49.6	49.6	0.991967	49.5	0.974897	49.5	0.990935	49.6	0.993559	49.6	0.986266	49.5	0.968453	49.5	0.97119	49.6	0.975607	49.6	0.99395	49.6	0.962602	49.6	0.993535	49.6	0.986627	49.6	0.987709	49.5	0.958026	49.6	0.965831	49.6	0.995612	49.6	0.977022	49.5	0.993517	49.6	0.99024	49.6	0.988664	49.6	0.981922	49.6	0.98572	49.6	0.991456	49.5	0.984873
16080	49.4	49.2	0.99445	49.2	0.966716	49.2	0.983696	49.3	0.993873	49.2	0.977974	49.3	0.978103	49.3	0.977114	49.2	0.988133	49.2	0.992136	49.3	0.961663	49.3	0.978666	49.2	0.986375	49.3	0.992198	49.3	0.960513	49.2	0.972448	49.3	0.994912	49.3	0.981954	49.2	0.993761	49.2	0.985987	49.2	0.988244	49.3	0.9781	49.2	0.989672	49.2	0.99105	49.2	0.989915
16800	49.2	49.2	0.994669	49.2	0.973988	49.2	0.987814	49.2	0.993716	49.2	0.985488	49.2	0.973311	49.1	0.976456	49.2	0.984555	49.1	0.993749	49.2	0.968708	49.1	0.981683	49.2	0.989992	49.1	0.988666	49.1	0.958712	49.1	0.978197	49.1	0.989952	49.1	0.988511	49.1	0.988593	49.1	0.990449	49.2	0.988844	49.1	0.971124	49.2	0.982669	49.1	0.99288	49.1	0.987293
17520	49	49	0.99759	49	0.969792	48.8	0.983198	49	0.991045	49.1	0.985942	48.8	0.975907	48.8	0.978353	49	0.995479	49	1	48.8	0.973228	48.8	0.993104	49	0.987216	49	0.991757	49	0.960041	49	0.972557	49	0.991033	48.8	0.983811	49	0.987248	49	0.986893	48.8	0.997121	49	0.977311	49	0.980361	48.8	0.991558	48.8	0.9881
18240	48.8	48.7	0.994231	48.7	0.974198	48.7	0.97058	48.7	0.996308	48.7	0.98944	48.7	0.988087	48.7	0.976572	48.7	0.987286	48.7	0.994757	48.7	0.96906	48.7	0.99472	48.7	0.99016	48.7	0.98999	48.7	0.9636	48.7	0.972665	48.7	0.98162	48.7	0.983231	48.7	0.993517	48.7	0.986336	48.7	0.990223	48.7	0.991386	48.7	0.986425	48.7	0.994915	48.7	0.996975
18960	48.6	48.6	0.99832	48.6	0.982239	48.6	0.973801	48.5	0.996544	48.6	0.988792	48.6	0.97777	48.5	0.984356	48.6	0.990205	48.6	0.996774	48.6	0.984031	48.5	0.984161	48.6	0.991842	48.6	0.983514	48.6	0.960813	48.6	0.982102	48.5	0.972081	48.6	0.979227	48.6	0.995535	48.6	0.991704	48.5	0.998321	48.5	0.986411	48.6	0.986972	48.5	0.995118	48.5	0.989512
19680	48.4	48.2	0.998393	48.2	0.987274	48.2	0.978815	48.2	0.992459	48.3	0.992744	48.2	0.978502	48.2	0.983736	48.2	0.991712	48.3	0.994152	48.2	0.973639	48.2	0.99569	48.2	0.989403	48.2	0.98977	48.2	0.963042	48.3	0.981234	48.2	0.965594	48.2	0.996344	48.3	0.991865	48.3	0.993865	48.2	0.990043	48.3	0.992114	48.3	0.990845	48.2	0.998881	48.2	0.987697
20400	48.2	48.2	0.996641	48.2	0.993147	48.2	0.977919	48.2	0.994344	48.2	0.989505	48.2	0.984825	48.1	0.986757	48.2	0.99369	48.2	0.992942	48.2	0.987201	48.1	0.983515	48.2	0.992599	48.1	0.99897	48.1	0.966129	48.2	0.976679	48.1	0.94219	48.1	0.995764	48.2	1	48.2	0.992819	48.2	0.99976	48.1	0.992174	48.2	0.990063	48.1	0.996745	48.2	0.98931
22200	48	48	1	48	0.987064	48	0.98695	47.8	0.996858	48	0.979982	48	1	48	0.988693	48	0.991241	48	0.992539	47.8	0.990137	47.8	0.99138	48	1	48	0.993597	47.8	0.970803	48	0.984272	48	0.894556	47.8	0.99176	48	0.989878	48	0.996584	47.8	0.990403	47.8	1	48	0.988655	47.8	0.99522	47.8	0.992537
24000	48	48	0.997225	47.8	0.985176	47.8	0.989042	48	0.996229	48	0.994817	48	0.98802	47.8	0.984782	48	0.977962	48	0.994555	48	0.973111	47.8	0.999138	48	0.993272	48	0.990506	48	0.962785	48	0.984922	48	0.863266	48	0.985494	48	0.98633	48	0.994841	48	0.988424	48	0.999515	48	0.995188	47.8	0.998169	47.8	0.993949
25800	48	48	0.999489	47.8	0.986784	48	0.992296	48	0.997643	48	0.98944	48	0.98376	47.8	0.983039	48	0.990299	48	0.994354	48	0.99501	47.8	0.987825	48	0.99857	48	1	48	0.967973	48	0.983512	48	0.843869	48	0.989265	48	0.987125	47.8	0.996793	48	0.992502	47.8	0.995875	48	0.996244	47.8	0.99644	48	0.994151
27600	48	48	0.997882	48	1	48	0.986154	48	0.9978	47.8	0.997927	48	0.984426	48	0.982303	47.8	0.989075	47.8	0.994152	47.8	0.982035	48	0.992242	47.8	0.997729	47.8	0.992419	47.8	0.972861	47.8	0.984272	47.8	0.827334	47.8	0.982186	47.8	0.982691	47.8	1	48	0.994842	47.8	0.996785	47.8	1	48	0.995728	48	0.992739
29400	48	48	0.995545	47.8	0.985805	48	0.978516	48	0.997565	48	0.982962	48	0.984825	47.8	0.982187	48	0.996892	48	0.993547	48	0.994481	47.8	0.984161	48	0.998318	48	0.987856	48	0.970288	48	0.989153	47.8	0.810417	48	0.992399	48	0.975994	48	0.997421	47.8	0.991843	48	1	48	0.994992	47.8	0.995423	47.8	0.992336
31200	48	48	0.99518	48	0.993567	48	0.989474	47.8	0.995679	48	0.982379	47.8	0.982895	47.8	0.980793	48	0.989169	48	0.995564	48	0.987377	47.8	0.992458	48	0.998402	48	0.988445	47.8	0.967458	48	0.982645	48	0.803803	48	0.994081	48	0.96893	48	0.998745	48	0.990463	47.8	0.994298	48	0.992723	47.8	0.995525	47.8	0.992336
33000	48	48	0.994888	48	0.978463	48	0.973702	48	0.993794	47.8	0.991319	48	0.98589	48	0.984007	48	0.977397	47.8	0.993345	48	0.992837	48	1	48	0.995206	47.8	0.984765	47.8	0.965358	47.8	0.976353	47.8	0.79331	48	1	47.8	0.972844	47.8	0.995468	48	0.99928	48	0.997513	48	0.987324	48	0.997152	48	0.99052
34800	48	48	0.995765	48	0.985036	48	0.988876	48	0.993637	48	0.996761	48	0.98223	47.8	0.983	48	0.986438	47.8	0.988102	47.8	0.992426	47.8	0.999569	48	0.996299	48	0.990358	48	0.968788	47.8	0.987417	47.8	0.786314	47.8	0.995242	48	0.963394	47.8	0.994632	47.8	0.987824	47.8	0.992538	48	0.986777	48	1	47.8	0.990722
36600	48	48	0.99445	47.8	0.991959	47.8	0.97161	47.8	0.992302	48	0.980565	47.8	0.981032	47.8	0.992023	48	0.98964	48	0.990522	47.8	0.982563	47.8	0.992027	48	0.995879	48	0.994333	48	0.971446	48	0.982536	48	0.779064	48	0.995126	48	0.955321	48	0.995678	47.8	0.990823	48	0.997209	48	0.994445	47.8	0.997864	47.8	0.991327
38400	48	48	0.992625	48	0.987763	48	0.971577	48	0.995522	48	0.993457	48	0.981032	48	0.984936	48	0.98851	48	0.992539	48	0.989843	48	0.988902	47.8	0.994113	48	0.992346	47.8	0.96883	47.8	0.984814	48	0.775948	48	0.970291	47.8	0.950306	47.8	0.993726	48	0.986984	47.8	0.995389	47.8	0.99378	47.8	0.996135	48	0.988907
40200	47.9	47.7	0.993282	47.7	0.978323	47.7	0.986751	47.7	0.994815	47.7	0.994882	47.7	0.991414	47.7	0.985672	47.7	0.990488	47.7	0.99395	47.7	0.978101	47.7	0.982222	47.7	0.995542	47.7	0.99183	47.7	0.971917	47.7	0.987417	47.7	0.766154	47.7	0.978415	47.7	0.941896	47.7	0.993795	47.7	1	47.7	0.989687	47.7	0.993467	47.7	0.995423	47.7	0.995361
42000	47.9	47.7	0.994304	47.7	0.975316	47.7	0.986419	47.7	0.996072	47.7	0.982508	47.7	0.984825	47.7	0.982768	47.7	0.987192	47.7	0.99516	47.7	0.975459	47.7	0.994613	47.7	0.998234	47.7	0.988813	47.7	0.968316	47.7	0.984055	47.7	0.76361	47.8	0.980968	47.7	0.938196	47.7	0.992819	47.7	0.988484	47.8	0.992235	47.7	0.995618	47.7	0.990439	47.7	0.995361
43800	47.9	47.7	0.991602	47.7	0.986644	47.7	0.984892	47.7	0.990259	47.7	0.992809	47.8	0.979501	47.7	0.988189	47.7	0.994067	47.7	0.995362	47.8	0.988258	47.8	0.991703	47.7	0.992515	47.8	0.991978	47.8	0.970974	47.7	0.973641	47.8	0.759985	47.8	0.967912	47.8	0.940275	47.8	0.98766	47.8	0.996521	47.8	0.988595	47.8	0.998787	47.8	0.989219	47.8	0.992537
45600	47.9	47.8	0.990945	47.8	0.987553	47.8	0.987714	47.8	0.991516	47.7	0.990606	47.8	0.981697	47.7	0.979902	47.8	0.984649	47.7	0.99395	47.8	0.973933	47.7	0.991165	47.8	0.995879	47.7	0.99264	47.8	0.962828	47.8	0.989912	47.7	0.746757	47.7	0.966404	47.8	0.92422	47.7	0.989752	47.8	0.991843	47.7	0.982043	47.8	0.986855	47.7	0.992067	47.8	0.990319
47400	47.9	47.8	0.991821	47.8	0.989022	47.8	0.978516	47.8	0.991752	47.7	0.981537	47.7	0.983694	47.7	0.985479	47.8	0.991524	47.7	0.992942	47.7	0.980332	47.7	0.977481	47.8	0.99815	47.7	0.988666	47.7	0.967115	47.7	0.983187	47.7	0.747965	47.7	0.970988	47.7	0.923364	47.7	0.988985	47.7	0.991543	47.7	0.988474	47.8	0.994875	47.7	0.993897	47.7	0.996571
49200	47.9	47.8	0.989046	47.8	0.980491	47.8	0.987449	47.7	0.993951	47.7	0.979658	47.8	0.982429	47.7	0.984511	47.7	0.985967	47.7	0.990926	47.8	0.985264	47.7	0.991811	47.7	0.99487	47.7	0.988003	47.7	0.974018	47.7	0.986658	47.7	0.741796	47.7	0.96768	47.7	0.921743	47.7	0.984105	47.7	0.990583	47.7	0.981922	47.7	0.989985	47.7	0.992982	47.7	0.991125
51000	47.9	47.7	0.987002	47.8	0.97231	47.7	0.976159	47.7	0.994108	47.7	0.984387	47.8	0.987953	47.8	0.980367	47.7	0.993219	47.8	0.990522	47.8	0.993894	47.8	0.98567	47.7	0.995122	47.8	0.983219	47.8	0.967073	47.7	0.984705	47.8	0.737599	47.7	0.962342	47.7	0.916024	47.7	0.98041	47.7	0.991723	47.7	0.99084	47.7	0.992762	47.8	0.992372	47.7	0.991932
52800	47.9	47.7	0.98649	47.7	0.993287	47.7	0.984958	47.7	0.987038	47.7	0.991254	47.8	0.987354	47.8	0.981103	47.8	0.98446	47.8	0.995967	47.7	0.980626	47.7	0.990518	47.7	0.987805	47.8	0.996246	47.8	0.969259	47.8	0.986766	47.8	0.736963	47.8	0.960137	47.8	0.911468	47.8	0.980828	47.7	0.991723	47.8	0.982468	47.8	0.984469	47.8	0.992575	47.7	0.990722
54600	47.9	47.8	0.980283	47.8	0.984477	47.8	0.984991	47.8	0.988452	47.8	0.97616	47.7	0.985757	47.7	0.979554	47.8	0.988039	47.7	0.988909	47.7	0.97951	47.7	0.98039	47.8	0.98831	47.7	0.984912	47.7	0.961628	47.7	0.975811	47.7	0.729267	47.7	0.958396	47.7	0.903058	47.7	0.976645	47.7	0.988844	47.7	0.983802	47.7	0.983725	47.7	0.991456	47.7	0.989512
56400	47.9	47.7	0.98262	47.8	0.981889	47.7	0.978782	47.7	0.988374	47.7	0.980824	47.7	0.977304	47.7	0.980406	47.7	0.986156	47.7	0.989514	47.7	0.989785	47.8	0.986532	47.7	0.99159	47.7	0.993008	47.8	0.96823	47.8	0.988394	47.7	0.723925	47.7	0.950853	47.8	0.902171	47.8	0.974484	47.7	0.987584	47.7	0.982529	47.8	0.991628	47.8	0.996338	47.7	0.987898
58200	47.8	47.7	0.98116	47.7	0.98112	47.7	0.981106	47.7	0.985703	47.7	0.986136	47.7	0.978636	47.7	0.974636	47.7	0.979846	47.7	0.991329	47.7	0.981917	47.7	0.973817	47.7	0.991842	47.7	0.983366	47.7	0.965786	47.7	0.984163	47.7	0.723162	47.7	0.952826	47.7	0.895046	47.7	0.974763	47.7	0.996701	47.7	0.983499	47.7	0.982865	47.7	0.990846	47.7	0.989915
60000	47.8	47.7	0.981744	47.7	0.977694	47.7	0.974366	47.7	0.991202	47.7	0.990023	47.7	0.984027	47.7	0.9818	47.7	0.98625	47.7	0.991732	47.7	0.971174	47.7	0.983515	47.7	0.99058	47.7	0.980054	47.7	0.964157	47.7	0.989478	47.7	0.720046	47.7	0.942439	47.7	0.896728	47.7	0.975669	47.7	0.983505	47.7	0.982953	47.7	0.984077	47.7	0.994609	47.7	0.990722
61800	47.8	47.7	0.981087	47.7	0.988532	47.7	0.984792	47.7	0.988374	47.7	0.978297	47.7	0.993278	47.7	0.981335	47.7	0.989264	47.7	0.989716	47.7	0.980861	47.7	0.983515	47.7	0.991253	47.7	0.982704	47.7	0.96703	47.7	0.98015	47.7	0.717248	47.7	0.944586	47.7	0.891835	47.7	0.971626	47.7	0.989863	47.7	0.979313	47.7	0.98709	47.7	0.99105	47.7	0.988503
63600	47.8	47.7	0.978093	47.7	0.975806	47.7	0.988611	47.7	0.987038	47.7	0.987691	47.7	0.981697	47.7	0.982497	47.7	0.987851	47.7	0.986288	47.7	0.978101	47.7	0.984592	47.7	0.99201	47.7	0.982483	47.7	0.962957	47.7	0.98156	47.7	0.713559	47.7	0.948706	47.7	0.887615	47.7	0.970998	47.7	0.994422	47.7	0.981679	47.7	0.990963	47.7	0.985354	47.7	0.98689
65400	47.8	47.7	0.977435	47.7	0.975177	47.7	0.978948	47.7	0.990495	47.7	0.979852	47.7	0.985424	47.7	0.988615	47.7	0.987286	47.7	0.987094	47.7	0.976046	47.7	0.973602	47.7	0.990664	47.7	0.983366	47.7	0.962442	47.7	0.979173	47.7	0.711969	47.7	0.945341	47.7	0.87789	47.7	0.968279	47.7	0.985725	47.7	0.981376	47.7	0.979696	47.7	0.986066	47.7	0.994353
67200	47.8	47.7	0.979991	47.7	0.984547	47.7	0.97151	47.7	0.988688	47.7	0.986072	47.7	0.988619	47.7	0.990939	47.7	0.987192	47.7	0.990522	47.7	0.968238	47.7	0.974464	47.7	0.990496	47.7	0.984029	47.7	0.962571	47.7	0.971363	47.7	0.708598	47.7	0.938842	47.7	0.877492	47.7	0.967513	47.7	0.987644	47.7	0.978403	47.7	0.986972	47.7	0.991355	47.7	0.991731
69000	47.8	47.7	0.97561	47.7	0.97189	47.7	0.964105	47.7	0.989552	47.7	0.987626	47.7	0.987155	47.7	0.98362	47.7	0.989923	47.7	0.990119	47.7	0.978395	47.7	0.979097	47.7	0.989151	47.7	0.992051	47.7	0.960899	47.7	0.983729	47.7	0.707517	47.7	0.939828	47.7	0.879602	47.7	0.964236	47.7	0.991843	47.7	0.977008	47.7	0.981104	47.7	0.990541	47.7	0.997378
70800	47.8	47.7	0.977947	47.7	0.97189	47.7	0.971942	47.7	0.986646	47.7	0.987432	47.7	0.986356	47.7	0.993843	47.7	0.987286	47.7	0.989514	47.7	0.988845	47.7	0.991057	47.7	0.991421	47.7	0.976595	47.7	0.965529	47.7	0.97158	47.7	0.70421	47.7	0.928746	47.7	0.875474	47.7	0.964027	47.7	0.991723	47.7	0.975977	47.7	0.979774	47.7	0.98871	47.7	1
72600	47.8	47.7	0.974076	47.7	0.967695	47.7	0.985257	47.7	0.986724	47.7	0.994947	47.7	0.985757	47.7	0.995353	47.7	0.988981	47.7	0.992337	47.7	0.996066	47.7	0.977912	47.7	0.992683	47.7	0.978288	47.7	0.969173	47.7	0.983729	47.7	0.705164	47.7	0.926192	47.7	0.873364	47.7	0.962005	47.7	0.983685	47.7	0.979981	47.7	0.990728	47.7	0.988609	47.7	0.994151
74400	47.8	47.7	0.971301	47.7	0.986085	47.7	0.980011	47.7	0.988531	47.7	0.985165	47.7	0.987953	47.7	0.984704	47.7	0.987286	47.7	0.990724	47.7	0.973816	47.7	0.978882	47.7	0.994281	47.7	0.988518	47.7	0.964414	47.7	0.974509	47.7	0.701348	47.7	0.9248	47.7	0.867003	47.7	0.959635	47.7	0.984165	47.7	0.972276	47.7	0.97594	47.7	0.989829	47.7	0.995764
76200	47.7	47.6	0.969622	47.6	0.97189	47.7	0.976956	47.7	0.989317	47.7	0.995854	47.7	0.98589	47.7	0.987531	47.7	0.979563	47.6	0.992337	47.7	0.990372	47.7	0.981791	47.7	0.993608	47.6	0.988445	47.6	0.96673	47.6	0.983946	47.6	0.698296	47.6	0.917431	47.6	0.875596	47.6	0.961935	47.7	0.981106	47.6	0.972761	47.7	0.981065	47.6	0.986168	47.7	0.992941
78000	47.7	47.6	0.969695	47.7	0.979582	47.7	0.981903	47.6	0.984918	47.7	0.996113	47.7	0.983894	47.6	0.988499	47.6	0.989923	47.6	0.994152	47.6	0.985381	47.6	0.977912	47.7	0.999075	47.6	0.97505	47.7	0.965701	47.7	0.981994	47.6	0.697151	47.7	0.925902	47.7	0.858532	47.7	0.957752	47.6	0.984105	47.6	0.971791	47.7	0.979148	47.7	0.990338	47.6	0.994151
79800	47.7	47.7	0.967796	47.7	0.976156	47.7	0.963375	47.6	0.980754	47.6	0.984841	47.7	0.982629	47.7	0.986795	47.6	0.988039	47.6	0.989312	47.7	0.990372	47.7	0.972848	47.6	0.993608	47.6	0.98057	47.6	0.9645	47.6	0.97798	47.6	0.692699	47.6	0.922595	47.6	0.862171	47.6	0.956497	47.7	0.980986	47.6	0.971609	47.6	0.978952	47.7	0.985964	47.7	0.995966
81600	47.7	47.7	0.966774	47.6	0.972869	47.6	0.963076	47.6	0.983975	47.7	0.997603	47.6	0.982762	47.6	0.992217	47.7	0.987945	47.7	0.991127	47.6	1	47.6	0.979313	47.7	0.994533	47.7	0.98057	47.7	0.970074	47.7	0.983946	47.7	0.690219	47.7	0.913311	47.7	0.860703	47.7	0.953988	47.6	0.981526	47.7	0.972519	47.7	0.980752	47.7	0.987592	47.6	0.992941
83400	47.7	47.7	0.96378	47.7	0.975037	47.7	0.982202	47.7	0.982247	47.7	0.996437	47.6	0.986556	47.6	0.99059	47.7	0.997928	47.7	0.990119	47.6	0.986732	47.6	0.983622	47.7	0.993608	47.7	0.97608	47.7	0.963814	47.7	0.972014	47.7	0.687738	47.6	0.912266	47.7	0.855749	47.6	0.952733	47.6	0.979487	47.7	0.968212	47.7	0.972928	47.6	0.983727	47.6	0.993546
85200	47.7	47.7	0.962976	47.6	0.978323	47.6	0.970879	47.6	0.983268	47.7	0.999676	47.7	0.995341	47.6	0.991636	47.7	0.989829	47.7	0.986288	47.7	0.996066	47.6	0.981791	47.7	0.993272	47.7	0.97689	47.7	0.957083	47.7	0.986224	47.7	0.684495	47.7	0.918881	47.7	0.858654	47.7	0.953639	47.6	0.976008	47.7	0.963904	47.7	0.968194	47.6	0.99105	47.6	0.991125
87000	47.7	47.7	0.962392	47.6	0.982029	47.7	0.972174	47.7	0.982011	47.7	0.996502	47.6	0.990815	47.6	0.994385	47.7	0.982953	47.7	0.988102	47.6	0.979393	47.6	0.978235	47.7	0.992599	47.6	0.984618	47.6	0.96017	47.7	0.969953	47.6	0.694861	47.7	0.920622	47.7	0.860245	47.7	0.953709	47.6	0.976368	47.7	0.965664	47.7	0.968233	47.6	0.983828	47.6	0.99637
88800	47.7	47.7	0.963488	47.7	0.987134	47.7	0.979247	47.7	0.986567	47.7	0.993068	47.7	0.988885	47.7	0.992139	47.6	0.994349	47.6	0.987699	47.7	0.99272	47.7	0.982653	47.6	0.991253	47.6	0.973798	47.6	0.963128	47.6	0.975919	47.7	0.695497	47.6	0.921086	47.6	0.859969	47.6	0.95845	47.7	0.982845	47.6	0.964268	47.6	0.970424	47.7	0.979251	47.6	0.991529
90600	47.7	47.6	0.966628	47.6	0.986994	47.6	0.967326	47.6	0.992066	47.7	0.998899	47.6	0.995607	47.6	0.995973	47.7	0.988793	47.7	0.989111	47.7	0.990254	47.6	0.988471	47.7	0.994113	47.7	0.977699	47.7	0.966258	47.7	0.984055	47.7	0.692063	47.7	0.91569	47.7	0.860948	47.7	0.961378	47.6	0.978047	47.7	0.961296	47.7	0.972654	47.6	0.98393	47.6	0.990319
92400	47.7	47.6	0.967869	47.6	0.994406	47.6	0.97928	47.6	0.994973	47.7	0.991125	47.6	0.990416	47.6	0.996747	47.7	0.991712	47.7	0.988304	47.7	0.996184	47.7	0.981037	47.7	0.990664	47.7	0.99448	47.7	0.97196	47.7	0.989478	47.7	0.690664	47.7	0.926192	47.7	0.856972	47.7	0.959635	47.6	0.977747	47.7	0.96348	47.7	0.974414	47.6	0.987693	47.6	0.994554
94200	47.6	47.5	0.966774	47.6	0.988253	47.5	0.966065	47.6	0.996701	47.6	0.993716	47.5	0.983161	47.6	0.986602	47.5	0.99256	47.6	0.989312	47.5	0.98315	47.6	0.968322	47.5	0.992599	47.6	0.99713	47.5	0.971403	47.5	0.979499	47.6	0.687802	47.5	0.91215	47.5	0.866789	47.5	0.957055	47.6	0.981406	47.5	0.954137	47.5	0.970971	47.6	0.976912	47.5	0.993949
96000	47.6	47.5	0.968672	47.6	0.991259	47.6	0.98456	47.6	0.997486	47.5	0.996826	47.6	0.989018	47.6	0.996089	47.6	0.987568	47.6	0.984674	47.5	0.989902	47.5	0.97274	47.6	0.995374	47.6	0.98528	47.5	0.980921	47.5	0.989695	47.6	0.685004	47.5	0.914413	47.6	0.853884	47.5	0.960123	47.6	0.982366	47.6	0.965724	47.6	0.964634	47.6	0.977319	47.6	0.98931
97800	47.6	47.5	0.967504	47.6	0.994196	47.6	0.981671	47.6	0.995915	47.5	1	47.6	0.993544	47.6	0.997986	47.6	0.993596	47.5	0.985884	47.6	0.987612	47.6	0.979636	47.6	0.989151	47.5	0.98896	47.5	0.978005	47.6	0.986116	47.5	0.68653	47.5	0.913891	47.6	0.859847	47.6	0.958589	47.6	0.96863	47.5	0.962509	47.6	0.970776	47.6	0.978641	47.6	0.994353
99600	47.6	47.6	0.965678	47.6	0.989301	47.5	0.981903	47.5	0.996858	47.6	0.983869	47.6	0.984626	47.5	0.98877	47.6	0.990488	47.6	0.984876	47.6	0.992309	47.6	0.958733	47.6	0.988646	47.6	0.992419	47.6	0.980578	47.6	0.984597	47.6	0.686848	47.6	0.911454	47.6	0.852263	47.6	0.953848	47.6	0.984225	47.5	0.959233	47.6	0.96835	47.6	0.97142	47.6	0.994353
101400	47.6	47.6	0.965386	47.5	0.989232	47.5	0.985357	47.6	0.996544	47.6	0.985488	47.5	0.983494	47.5	0.988809	47.6	0.990017	47.6	0.987699	47.6	0.986027	47.5	0.967891	47.6	0.988814	47.6	0.992051	47.6	0.975004	47.6	0.994576	47.6	0.682269	47.6	0.911686	47.6	0.855841	47.6	0.954685	47.6	0.975708	47.6	0.958141	47.6	0.965103	47.5	0.97142	47.5	0.994353
103200	47.6	47.6	0.960421	47.6	0.99021	47.6	0.9741	47.5	0.993401	47.6	0.983027	47.6	0.99208	47.6	0.993765	47.5	0.988039	47.5	0.981448	47.6	0.98726	47.6	0.963905	47.5	0.987637	47.5	0.987341	47.6	0.980235	47.5	0.991539	47.5	0.680679	47.5	0.907044	47.6	0.860612	47.5	0.956149	47.6	0.989683	47.5	0.970456	47.6	0.98353	47.6	0.983116	47.6	0.994151
105000	47.6	47.5	0.960275	47.6	0.987344	47.6	0.970082	47.6	0.999529	47.5	0.995141	47.5	0.984359	47.5	0.99605	47.5	0.98446	47.5	0.983061	47.5	0.980978	47.6	0.964228	47.5	0.991253	47.6	0.987709	47.6	0.980149	47.6	0.985248	47.6	0.680425	47.5	0.920158	47.6	0.853028	47.6	0.95343	47.5	0.984405	47.5	0.973611	47.6	0.981065	47.5	0.978946	47.6	0.993546
106800	47.6	47.6	0.958595	47.6	0.988043	47.6	0.9828	47.6	0.990966	47.5	0.982638	47.6	0.991481	47.6	0.993456	47.5	0.988133	47.5	0.979431	47.6	0.982446	47.6	0.962396	47.6	0.989907	47.5	0.994333	47.6	0.978348	47.5	0.98937	47.5	0.678581	47.5	0.903563	47.5	0.843914	47.5	0.950851	47.5	0.989263	47.5	0.975249	47.5	0.980987	47.6	0.979455	47.6	0.992739
108600	47.6	47.6	0.959106	47.5	0.983498	47.5	0.972938	47.6	0.996936	47.6	0.99553	47.6	0.988686	47.6	0.995857	47.6	0.99143	47.6	0.98044	47.6	0.979334	47.5	0.955931	47.6	0.98688	47.6	0.990726	47.5	0.981264	47.6	0.992624	47.6	0.677054	47.6	0.901996	47.6	0.843058	47.6	0.948689	47.5	0.985065	47.6	0.965724	47.6	0.975588	47.5	0.983218	47.5	0.994958
110400	47.6	47.6	0.955163	47.5	0.978743	47.6	0.978317	47.6	0.996936	47.6	0.987756	47.6	0.987354	47.5	0.996592	47.6	0.990582	47.6	0.979835	47.6	0.982505	47.5	0.959272	47.6	0.987805	47.6	0.993229	47.5	0.97822	47.6	0.985899	47.6	0.677754	47.6	0.902518	47.6	0.836544	47.6	0.947783	47.5	0.986564	47.6	0.965178	47.6	0.971284	47.5	0.98393	47.5	0.995361
112200	47.5	47.5	0.95509	47.5	0.985875	47.5	0.985025	47.5	0.995365	47.5	0.996307	47.5	0.988619	47.3	0.993572	47.5	0.992183	47.5	0.975802	47.5	0.978982	47.5	0.957655	47.5	0.986039	47.5	0.980422	47.3	0.978777	47.5	0.984705	47.3	0.676863	47.3	0.896774	47.5	0.837615	47.5	0.95099	47.5	0.990463	47.3	0.968272	47.5	0.973475	47.5	0.981082	47.5	0.99637
114000	47.5	47.6	0.951658	47.5	0.976855	47.5	0.981937	47.3	0.99513	47.5	0.999806	47.5	0.989151	47.5	0.988693	47.5	0.996044	47.3	0.978625	47.5	0.991194	47.3	0.962504	47.5	0.985366	47.3	0.985722	47.3	0.974576	47.5	0.994468	47.3	0.675083	47.3	0.905942	47.3	0.834832	47.5	0.951757	47.5	0.988304	47.3	0.971306	47.5	0.977309	47.3	0.978133	47.5	0.991327
115800	47.5	47.3	0.954067	47.5	0.988113	47.5	0.964338	47.3	0.995679	47.3	0.999676	47.5	0.984426	47.5	0.993998	47.3	0.988698	47.3	0.980036	47.5	0.980215	47.3	0.944187	47.5	0.985786	47.3	0.979834	47.5	0.982507	47.5	0.997505	47.3	0.67292	47.5	0.903853	47.5	0.840336	47.5	0.949387	47.3	0.985485	47.3	0.969607	47.5	0.975627	47.5	0.977929	47.5	0.992537
117600	47.5	47.5	0.949175	47.5	0.972519	47.5	0.977255	47.5	0.991438	47.3	0.997603	47.5	0.992146	47.5	0.990203	47.5	0.998964	47.3	0.979028	47.5	0.988669	47.5	0.942248	47.5	0.98217	47.3	0.982704	47.5	0.982679	47.3	0.99642	47.3	0.671267	47.5	0.90101	47.3	0.832324	47.3	0.946319	47.5	0.983745	47.5	0.967241	47.5	0.969915	47.3	0.979251	47.5	0.994756
119400	47.5	47.5	0.948006	47.5	0.975806	47.5	0.978682	47.5	1	47.3	0.994299	47.5	0.990416	47.5	0.995121	47.5	0.996986	47.3	0.971365	47.5	0.980274	47.5	0.949682	47.5	0.981749	47.5	0.977258	47.3	0.983236	47.3	0.995119	47.5	0.668723	47.5	0.904955	47.5	0.839572	47.3	0.951757	47.5	0.987284	47.5	0.961478	47.3	0.974297	47.5	0.982201	47.5	0.98931
121200	47.5	47.5	0.947203	47.3	0.983358	47.3	0.974266	47.5	0.995051	47.5	0.983027	47.5	0.990483	47.3	0.9909	47.3	0.987757	47.5	0.978221	47.5	0.987436	47.5	0.947204	47.3	0.982675	47.5	0.986899	47.3	0.977234	47.5	0.981451	47.5	0.669359	47.5	0.902344	47.5	0.838135	47.5	0.946877	47.5	0.984345	47.3	0.965603	47.5	0.970893	47.5	0.97559	47.5	0.994151
123000	47.5	47.5	0.944574	47.3	0.98119	47.3	0.959058	47.3	0.994108	47.5	0.988663	47.5	0.999867	47.5	0.992488	47.5	0.991053	47.5	0.977213	47.5	0.987319	47.3	0.947958	47.5	0.977796	47.5	0.982557	47.5	0.979377	47.5	0.995553	47.5	0.667515	47.5	0.89689	47.5	0.832538	47.5	0.947365	47.5	0.988004	47.5	0.963176	47.5	0.969759	47.3	0.978438	47.5	0.993344
124800	47.5	47.5	0.942457	47.5	0.964618	47.3	0.969385	47.3	0.99348	47.5	0.993522	47.5	0.985424	47.3	0.995663	47.3	1	47.5	0.972373	47.5	0.986438	47.5	0.950544	47.3	0.981497	47.5	0.983661	47.5	0.982936	47.3	0.996746	47.5	0.667197	47.5	0.896774	47.3	0.827064	47.3	0.945761	47.5	0.982246	47.5	0.957535	47.5	0.972575	47.5	0.96786	47.5	0.993344
126600	47.5	47.3	0.939682	47.5	0.97189	47.5	0.964836	47.3	0.99513	47.5	0.991772	47.5	0.989151	47.3	0.990358	47.5	0.994538	47.5	0.971164	47.5	0.990548	47.3	0.948281	47.5	0.979899	47.3	0.980349	47.5	0.980063	47.5	0.995444	47.3	0.665162	47.3	0.890623	47.5	0.825596	47.5	0.940045	47.5	0.979487	47.3	0.96166	47.5	0.970189	47.3	0.970606	47.5	0.996773
128400	47.5	47.5	0.937199	47.5	0.974757	47.3	0.966563	47.5	0.994815	47.5	0.989116	47.5	0.991281	47.5	0.9921	47.5	0.989546	47.5	0.967937	47.5	0.978512	47.3	0.930826	47.5	0.978806	47.5	0.988298	47.5	0.985294	47.5	0.990671	47.5	0.665289	47.3	0.887316	47.5	0.831346	47.5	0.944297	47.5	0.981646	47.3	0.961842	47.5	0.968702	47.3	0.972132	47.5	0.993949
130200	47.4	47.2	0.940339	47.3	0.977974	47.2	0.97234	47.2	0.995915	47.3	0.996113	47.3	0.999201	47.2	1	47.2	0.994632	47.3	0.968945	47.2	0.993953	47.2	0.941493	47.2	0.980235	47.3	0.97711	47.2	0.98911	47.2	0.996529	47.2	0.664335	47.2	0.894221	47.2	0.83107	47.2	0.9436	47.2	0.983505	47.2	0.955836	47.2	0.969446	47.2	0.975488	47.2	0.996975
132000	47.4	47.2	0.939828	47.3	0.977694	47.2	0.970946	47.2	0.990652	47.2	0.997992	47.3	0.987221	47.3	0.989932	47.2	0.996892	47.2	0.974188	47.3	0.976046	47.2	0.937938	47.2	0.977881	47.2	0.981453	47.2	0.986194	47.2	0.983621	47.2	0.665607	47.2	0.886271	47.2	0.82156	47.2	0.943112	47.3	0.983025	47.2	0.960386	47.2	0.967177	47.3	0.970911	47.3	0.994958
133800	47.4	47.2	0.933036	47.3	0.975456	47.3	0.969086	47.2	0.996308	47.2	0.993133	47.2	0.986356	47.3	0.992875	47.2	0.992089	47.2	0.967534	47.2	0.98544	47.3	0.925116	47.2	0.978806	47.2	0.977331	47.2	0.983665	47.2	0.982536	47.2	0.663508	47.2	0.889927	47.2	0.833119	47.3	0.94374	47.2	0.982366	47.2	0.954926	47.2	0.966081	47.3	0.973963	47.2	0.995361
135600	47.4	47.2	0.933401	47.2	0.97189	47.2	0.97151	47.2	0.99183	47.2	0.996502	47.2	0.985291	47.3	0.994346	47.2	0.992089	47.2	0.960879	47.2	0.984912	47.3	0.945372	47.2	0.978722	47.2	0.984323	47.2	0.981521	47.3	0.999349	47.2	0.662045	47.3	0.880817	47.2	0.832661	47.3	0.939278	47.2	0.980086	47.3	0.958687	47.2	0.967529	47.3	0.971623	47.2	0.992941
137400	47.4	47.3	0.931211	47.3	0.967555	47.3	0.969983	47.2	0.99348	47.2	0.997473	47.2	0.991082	47.2	0.993262	47.2	0.990676	47.2	0.962694	47.2	0.986086	47.3	0.940739	47.2	0.973844	47.2	0.974608	47.2	0.983279	47.3	0.995987	47.2	0.658611	47.2	0.887838	47.2	0.827615	47.3	0.941509	47.2	0.979607	47.2	0.954198	47.2	0.95947	47.2	0.969081	47.3	0.99052
139200	47.4	47.2	0.929166	47.2	0.977204	47.3	0.962047	47.3	0.992459	47.2	0.987302	47.3	0.986023	47.3	0.989506	47.2	0.995385	47.2	0.960476	47.3	0.981096	47.3	0.936645	47.2	0.975442	47.2	0.97424	47.2	0.982079	47.2	0.983187	47.3	0.660074	47.3	0.893699	47.2	0.822018	47.2	0.939208	47.3	0.978767	47.3	0.94249	47.2	0.96522	47.2	0.964402	47.2	0.993142
141000	47.4	47.2	0.928728	47.2	0.965946	47.2	0.948732	47.2	0.991438	47.2	0.994882	47.3	0.99015	47.2	0.988886	47.2	0.988604	47.2	0.959064	47.3	0.96589	47.3	0.916927	47.2	0.973591	47.3	0.973578	47.3	0.989667	47.2	0.988177	47.3	0.659756	47.3	0.886445	47.2	0.814251	47.2	0.94116	47.3	0.978407	47.3	0.953288	47.2	0.95321	47.3	0.964504	47.3	0.991125
142800	47.4	47.2	0.928655	47.3	0.980141	47.2	0.952949	47.3	0.992066	47.2	0.995919	47.3	0.988353	47.3	0.993301	47.2	0.987192	47.2	0.957653	47.2	0.972172	47.3	0.927917	47.2	0.96947	47.2	0.974166	47.2	0.985723	47.2	0.981126	47.2	0.655368	47.2	0.879831	47.2	0.815168	47.2	0.940672	47.2	0.982786	47.2	0.946433	47.2	0.957787	47.3	0.96308	47.2	0.989714
144600	47.4	47.2	0.92734	47.3	0.9628	47.3	0.968156	47.3	0.988531	47.2	0.993068	47.2	0.98975	47.3	0.992797	47.2	0.996044	47.2	0.958661	47.2	0.986262	47.2	0.916819	47.2	0.972077	47.2	0.974019	47.2	0.983836	47.2	0.98861	47.2	0.657911	47.2	0.878206	47.2	0.812385	47.2	0.93621	47.2	0.976188	47.2	0.95165	47.2	0.957513	47.3	0.965622	47.2	0.992336
146400	47.4	47.2	0.925077	47.3	0.976156	47.3	0.968655	47.2	0.990652	47.2	0.992809	47.3	0.982696	47.2	0.991326	47.2	0.993784	47.2	0.955636	47.2	0.978688	47.3	0.916496	47.2	0.970816	47.2	0.968426	47.2	0.986666	47.2	0.992082	47.2	0.654286	47.2	0.886852	47.2	0.81945	47.2	0.940254	47.3	0.972469	47.2	0.954987	47.2	0.953093	47.3	0.96074	47.3	0.991731
148200	47.3	47.2	0.920987	47.2	0.964967	47.2	0.957398	47.2	0.987274	47.2	0.995206	47.2	0.991681	47.2	0.992294	47.2	0.98964	47.2	0.954426	47.2	0.973816	47.2	0.91488	47.2	0.969975	47.2	0.973062	47.2	0.982293	47.2	0.988719	47.2	0.655558	47.2	0.877626	47.2	0.817951	47.2	0.936977	47.2	0.973309	47.2	0.952742	47.2	0.950667	47.2	0.961554	47.2	0.988705
150000	47.3	47.2	0.919089	47.2	0.975666	47.2	0.96643	47.2	0.988452	47.2	0.982897	47.2	0.989285	47.2	0.99241	47.2	0.991995	47.2	0.9512	47.2	0.976399	47.2	0.904752	47.2	0.969807	47.2	0.967248	47.2	0.982464	47.2	0.996637	47.2	0.656767	47.2	0.879889	47.2	0.80367	47.2	0.935722	47.2	0.96989	47.2	0.947161	47.2	0.951528	47.2	0.959113	47.2	0.988503
151800	47.3	47.2	0.917336	47.2	0.971331	47.2	0.957298	47.2	0.987667	47.2	0.992744	47.2	0.990349	47.2	0.986098	47.2	0.99661	47.2	0.951401	47.2	0.978043	47.2	0.90529	47.2	0.965265	47.2	0.978582	47.2	0.984522	47.2	0.998264	47.2	0.65505	47.2	0.886619	47.2	0.815199	47.2	0.935583	47.2	0.972349	47.2	0.945766	47.2	0.951019	47.2	0.956469	47.2	0.989915
153600	47.3	47.2	0.918358	47.2	0.978673	47.2	0.95162	47.2	0.984839	47.2	0.984452	47.2	0.98995	47.2	0.992875	47.2	0.98964	47.2	0.949183	47.2	0.977456	47.2	0.907122	47.2	0.958789	47.2	0.98079	47.2	0.980921	47.2	0.984272	47.2	0.653269	47.2	0.882036	47.2	0.819327	47.2	0.932306	47.2	0.973309	47.2	0.94795	47.2	0.947968	47.2	0.962469	47.2	0.989109
155400	47.3	47.2	0.91405	47.2	0.976785	47.2	0.960885	47.2	0.986881	47.2	0.996631	47.2	0.984226	47.2	0.99605	47.2	0.975231	47.2	0.945957	47.2	0.974637	47.2	0.916604	47.2	0.962742	47.2	0.971149	47.2	0.980878	47.2	0.999132	47.2	0.654223	47.2	0.889637	47.2	0.820214	47.2	0.935722	47.2	0.973249	47.2	0.943278	47.2	0.950589	47.2	0.95952	47.2	0.987293
157200	47.3	47.2	0.911421	47.2	0.974897	47.2	0.957464	47.2	0.986489	47.2	0.994234	47.2	0.991148	47.2	0.993223	47.2	0.990582	47.2	0.948377	47.2	0.974755	47.2	0.908846	47.2	0.963835	47.2	0.979539	47.2	0.976162	47.2	0.983946	47.2	0.650661	47.2	0.87896	47.2	0.810183	47.2	0.932585	47.2	0.96959	47.2	0.947889	47.2	0.946833	47.2	0.961452	47.2	0.988907
159000	47.3	47.2	0.912005	47.2	0.967834	47.2	0.950126	47.2	0.986803	47.2	0.993263	47.2	0.992346	47.2	0.985866	47.2	0.989075	47.2	0.950192	47.2	0.98045	47.2	0.90055	47.2	0.962574	47.2	0.965408	47.2	0.984394	47.2	0.981126	47.2	0.65276	47.2	0.866021	47.2	0.809174	47.2	0.930424	47.2	0.964851	47.2	0.942247	47.2	0.942295	47.2	0.952299	47.2	0.989714
160800	47.3	47.2	0.90704	47.2	0.954059	47.2	0.956269	47.2	0.984918	47.2	0.99391	47.2	0.990017	47.2	0.988615	47.2	0.990959	47.2	0.941117	47.2	0.981859	47.2	0.902704	47.2	0.957191	47.2	0.975491	47.2	0.984694	47.2	0.997397	47.2	0.650852	47.2	0.876639	47.2	0.804557	47.2	0.932306	47.2	0.96911	47.2	0.94067	47.2	0.949728	47.2	0.960537	47.2	0.989915
162600	47.3	47.2	0.90704	47.2	0.950703	47.2	0.959092	47.2	0.984525	47.2	0.992485	47.2	0.988752	47.2	0.996554	47.2	0.991335	47.2	0.941924	47.2	0.983092	47.2	0.904967	47.2	0.962994	47.2	0.9724	47.2	0.984823	47.2	0.997939	47.2	0.650153	47.2	0.871823	47.2	0.820856	47.2	0.932724	47.2	0.964012	47.2	0.939638	47.2	0.940887	47.2	0.95657	47.2	0.989109
164400	47.3	47.2	0.905506	47.2	0.970841	47.2	0.952882	47.2	0.986174	47.2	0.993975	47.2	0.990283	47.2	0.992294	47.2	0.988698	47.2	0.937487	47.2	0.97998	47.2	0.893546	47.2	0.960892	47.2	0.970634	47.2	0.987909	47.2	0.997831	47.2	0.647736	47.2	0.871359	47.2	0.805015	47.2	0.932515	47.2	0.966591	47.1	0.935453	47.2	0.938539	47.2	0.950264	47.2	0.989109
166200	47.2	47.2	0.904046	47.1	0.972729	47.2	0.949794	47.2	0.987353	47.1	0.991254	47.2	0.986423	47.2	0.994734	47.2	0.989452	47.1	0.942125	47.2	0.979921	47.2	0.894839	47.1	0.958116	47.1	0.958931	47.2	0.988681	47.1	0.982211	47.1	0.647863	47.2	0.876929	47.1	0.798624	47.1	0.931191	47.2	0.972949	47.2	0.941155	47.1	0.933845	47.2	0.955858	47.2	0.982856
168000	47.2	47.2	0.907332	47.2	0.966156	47.1	0.957066	47.1	0.984446	47.2	0.991513	47.2	0.986556	47.2	0.985788	47.1	0.986721	47.2	0.940512	47.2	0.97681	47.2	0.896671	47.1	0.956854	47.2	0.964893	47.1	0.982593	47.2	0.986983	47.2	0.646718	47.2	0.887258	47.2	0.804709	47.2	0.935513	47.2	0.972109	47.1	0.935817	47.1	0.936544	47.2	0.951587	47.2	0.987697
169800	47.2	47.1	0.902366	47.2	0.959793	47.1	0.958394	47.2	0.983111	47.1	0.993651	47.2	0.986889	47.1	0.992875	47.1	0.98964	47.1	0.936076	47.2	0.97587	47.2	0.893977	47.1	0.954584	47.2	0.959962	47.2	0.983451	47.2	0.999024	47.2	0.646973	47.1	0.87455	47.2	0.802355	47.2	0.929378	47.2	0.964251	47.1	0.933208	47.1	0.93717	47.1	0.945688	47.1	0.986285
171600	47.2	47.1	0.900467	47.1	0.964128	47.1	0.954044	47.1	0.983504	47.1	0.989894	47.2	0.978835	47.2	0.989467	47.1	0.987474	47.1	0.932648	47.2	0.974696	47.2	0.884172	47.1	0.957359	47.2	0.963789	47.2	0.986537	47.1	0.996746	47.2	0.646846	47.2	0.875537	47.2	0.804465	47.2	0.932864	47.2	0.962272	47.2	0.930175	47.2	0.938539	47.2	0.945993	47.2	0.980839
173400	47.2	47.1	0.90149	47.2	0.963989	47.2	0.940796	47.1	0.980754	47.1	0.988469	47.2	0.986955	47.2	0.995469	47.1	0.98851	47.1	0.930631	47.1	0.976281	47.2	0.879862	47.1	0.95492	47.1	0.956576	47.2	0.991511	47.2	1	47.1	0.645637	47.1	0.868516	47.2	0.813884	47.2	0.931958	47.2	0.962692	47.1	0.934421	47.1	0.935722	47.2	0.946705	47.2	0.990924
175200	47.2	47.2	0.896159	47.1	0.968184	47.2	0.951421	47.2	0.982875	47.2	0.990477	47.2	0.98589	47.1	0.98757	47.2	0.996515	47.2	0.929623	47.2	0.968414	47.1	0.874906	47.2	0.951724	47.1	0.950467	47.1	0.983451	47.2	0.994685	47.1	0.644175	47.1	0.872694	47.1	0.797492	47.2	0.931191	47.1	0.960653	47.1	0.933936	47.1	0.934823	47.1	0.945891	47.1	0.983663
177000	47.2	47.2	0.893457	47.1	0.957066	47.2	0.947968	47.1	0.978869	47.2	0.979269	47.1	0.986755	47.1	0.994385	47.2	0.97702	47.2	0.923977	47.1	0.973405	47.1	0.886973	47.1	0.948865	47.2	0.951277	47.2	0.983408	47.1	0.999024	47.2	0.645256	47.1	0.872113	47.1	0.799021	47.1	0.931958	47.2	0.960053	47.2	0.932905	47.1	0.931771	47.2	0.942941	47.2	0.983461
178800	47.2	47.2	0.893238	47.2	0.961821	47.2	0.94913	47.2	0.977926	47.1	0.989505	47.1	0.982496	47.2	0.988305	47.1	0.985685	47.1	0.924582	47.1	0.97041	47.2	0.874259	47.1	0.947435	47.1	0.959815	47.1	0.976848	47.1	0.993383	47.1	0.641376	47.1	0.868632	47.1	0.799511	47.1	0.930633	47.2	0.967011	47.1	0.926353	47.1	0.929424	47.2	0.942738	47.2	0.987293
180600	47.2	47.2	0.890536	47.2	0.960702	47.2	0.950458	47.2	0.981068	47.2	0.978427	47.2	0.989218	47.2	0.991132	47.2	0.992371	47.2	0.923775	47.2	0.980391	47.1	0.876953	47.2	0.947098	47.1	0.956061	47.2	0.986495	47.2	0.997288	47.1	0.640804	47.1	0.867239	47.2	0.808838	47.2	0.928542	47.1	0.953695	47.2	0.922774	47.2	0.931145	47.1	0.938771	47.2	0.98568
182400	47.2	47.1	0.890536	47.1	0.96266	47.1	0.946241	47.2	0.982247	47.1	0.98795	47.2	0.979501	47.2	0.989777	47.2	0.985308	47.2	0.920548	47.2	0.95996	47.2	0.863054	47.2	0.949201	47.2	0.952013	47.2	0.978563	47.1	0.993926	47.2	0.641567	47.2	0.86486	47.2	0.796636	47.1	0.92659	47.2	0.964971	47.2	0.927505	47.2	0.926098	47.2	0.933788	47.2	0.985276
184200	47.1	47.1	0.888929	47.1	0.966366	47.1	0.951454	47	0.980754	47	0.976354	47	0.985158	47	0.984201	47	0.986909	47	0.92075	47	0.964246	47.1	0.859821	47	0.945837	47.1	0.950762	47.1	0.984694	47.1	0.993709	47	0.640422	47.1	0.872229	47.1	0.791621	47.1	0.928263	47.1	0.955914	47	0.91968	47.1	0.921286	47.1	0.934296	47.1	0.982856
186000	47.1	47.1	0.886301	47	0.959443	47	0.944714	47	0.980126	47.1	0.983739	47	0.982629	47	0.984007	47.1	0.983613	47.1	0.914902	47	0.966829	47	0.861114	47.1	0.948108	47.1	0.955546	47.1	0.983279	47.1	0.992949	47.1	0.639596	47.1	0.870547	47.1	0.799235	47.1	0.930075	47	0.957833	47	0.921864	47.1	0.926724	47	0.93216	47	0.981242
187800	47.1	47	0.885132	47.1	0.950003	47	0.94219	47	0.975727	47.1	0.981018	47.1	0.990349	47.1	0.988577	47.1	0.981258	47.1	0.911272	47.1	0.968414	47.1	0.862192	47.1	0.941379	47.1	0.954147	47	0.98105	47.1	0.993058	47	0.640486	47.1	0.866659	47.1	0.789939	47	0.92638	47.1	0.963472	47.1	0.917132	47	0.922929	47.1	0.930228	47.1	0.982251
189600	47.1	47.1	0.880459	47	0.94371	47	0.946108	47.1	0.976748	47	0.982897	47.1	0.990616	47.1	0.981103	47.1	0.984366	47.1	0.912281	47.1	0.977397	47.1	0.856265	47.1	0.940034	47.1	0.945021	47.1	0.988896	47	0.983946	47.1	0.635398	47.1	0.862597	47	0.794587	47	0.926799	47.1	0.953995	47	0.922834	47	0.922069	47.1	0.929109	47	0.97741
191400	47.1	47.1	0.883307	47.1	0.957485	47.1	0.941128	47.1	0.979104	47.1	0.970588	47.1	0.982962	47.1	0.991481	47	0.977491	47.1	0.910063	47	0.971819	47	0.853249	47	0.94222	47	0.944727	47.1	0.985551	47.1	0.98156	47	0.639214	47.1	0.876639	47.1	0.797768	47.1	0.926938	47	0.951296	47.1	0.928537	47.1	0.922147	47.1	0.940297	47	0.979427
193200	47.1	47.1	0.882503	47	0.957485	47.1	0.94043	47.1	0.974863	47	0.979399	47.1	0.984493	47.1	0.987879	47	0.980316	47.1	0.913087	47.1	0.969119	47.1	0.856696	47.1	0.939529	47.1	0.948112	47.1	0.984823	47	0.993383	47.1	0.641185	47.1	0.861263	47.1	0.803945	47	0.924428	47.1	0.952855	47.1	0.921075	47	0.918587	47.1	0.934601	47.1	0.974788
195000	47.1	47	0.880824	47.1	0.955388	47	0.93784	47.1	0.976434	47	0.989829	47.1	0.988353	47.1	0.984898	47.1	0.986909	47	0.904618	47.1	0.969412	47.1	0.847861	47.1	0.939529	47	0.951645	47	0.988338	47	0.991648	47.1	0.638832	47	0.862423	47.1	0.798379	47	0.924149	47.1	0.957534	47	0.924715	47.1	0.916122	47	0.930228	47.1	0.985276
196800	47.1	47.1	0.877976	47.1	0.950773	47.1	0.938272	47.1	0.974548	47.1	0.973892	47	0.988819	47.1	0.989506	47.1	0.976643	47	0.902601	47	0.962896	47.1	0.855188	47.1	0.938267	47	0.941783	47	0.987438	47	0.981451	47	0.635462	47	0.8731	47	0.789694	47	0.921221	47	0.946497	47	0.910641	47	0.91843	47	0.928194	47.1	0.978822
198600	47.1	47	0.874178	47.1	0.9535	47	0.938936	47.1	0.973841	47.1	0.983091	47	0.988153	47.1	0.988305	47	0.990582	47.1	0.9024	47.1	0.965361	47.1	0.850555	47	0.931119	47.1	0.942224	47.1	0.992197	47	0.984055	47.1	0.635144	47.1	0.874202	47.1	0.797156	47	0.921988	47.1	0.949976	47	0.914584	47	0.923595	47.1	0.926058	47.1	0.976603
200400	47.1	47.1	0.874105	47.1	0.954758	47.1	0.920806	47.1	0.97447	47	0.972856	47.1	0.980433	47	0.976688	47.1	0.991524	47	0.898568	47.1	0.958258	47.1	0.838703	47.1	0.937426	47	0.947082	47	0.985809	47.1	0.995227	47	0.63578	47	0.863584	47	0.787278	47.1	0.924428	47	0.949796	47	0.920286	47.1	0.915066	47.1	0.927075	47.1	0.973981
202200	47	47	0.873594	46.8	0.954339	46.8	0.937508	46.8	0.975177	47	0.982897	47	0.985757	46.8	0.981606	47	0.985214	47	0.89635	47	0.962308	47	0.838056	47	0.935576	47	0.945904	47	0.991297	47	0.997288	47	0.635653	47	0.856563	47	0.79055	47	0.92645	46.8	0.949796	47	0.914887	46.8	0.914088	47	0.920972	46.8	0.974788
204000	47	46.8	0.870016	46.8	0.948535	46.8	0.937077	47	0.974548	47	0.975058	47	0.982696	47	0.983852	46.8	0.97994	47	0.893325	47	0.958727	47	0.833208	46.8	0.93196	47	0.933392	47	0.988252	47	0.996963	47	0.635271	47	0.857665	47	0.788685	47	0.922058	47	0.948237	47	0.917132	47	0.913697	47	0.922396	46.8	0.976603
205800	47	47	0.86746	46.8	0.950633	47	0.933856	47	0.972977	47	0.972726	47	0.98396	46.8	0.986408	47	0.979375	46.8	0.889897	47	0.959549	47	0.830298	47	0.930278	47	0.941709	46.8	0.988981	47	0.994793	47	0.633299	47	0.86074	47	0.796453	47	0.923243	47	0.941759	47	0.907607	47	0.908924	47	0.922295	47	0.973578
207600	47	47	0.864904	46.8	0.950073	47	0.933989	47	0.969285	47	0.978233	47	0.982496	47	0.98664	47	0.981541	47	0.888486	47	0.95133	46.8	0.827174	46.8	0.926156	47	0.940311	47	0.989024	46.8	0.982319	47	0.632409	47	0.863003	46.8	0.791009	46.8	0.917805	47	0.950396	47	0.911005	46.8	0.913736	47	0.925753	47	0.969544
209400	47	46.8	0.86673	46.8	0.956297	46.8	0.927281	47	0.971877	47	0.979658	47	0.979434	47	0.978199	47	0.980222	47	0.888082	47	0.949862	47	0.827389	47	0.929773	47	0.940531	47	0.988038	47	0.998264	47	0.633554	47	0.866601	47	0.790673	47	0.922197	47	0.941219	47	0.912218	47	0.911428	46.8	0.921684	47	0.972771
211200	47	46.8	0.865489	47	0.952031	47	0.921271	47	0.97447	47	0.964887	47	0.9797	46.8	0.981374	47	0.980882	47	0.884453	47	0.965537	46.8	0.828682	47	0.92767	47	0.933319	47	0.987309	47	0.995444	47	0.632918	47	0.86428	47	0.788104	47	0.925753	46.8	0.941339	46.8	0.909306	47	0.914753	46.8	0.916497	46.8	0.974788
213000	47	46.8	0.864612	47	0.942242	47	0.918914	46.8	0.970228	46.8	0.973503	46.8	0.982962	47	0.979786	47	0.978715	47	0.886872	47	0.956203	47	0.821571	47	0.925231	47	0.929197	47	0.98881	47	0.985573	46.8	0.632536	47	0.852791	47	0.779725	47	0.921221	47	0.942718	46.8	0.907486	47	0.905559	47	0.918328	47	0.973578
214800	47	46.8	0.860888	47	0.94378	47	0.935948	47	0.972663	46.8	0.977909	47	0.97817	47	0.976998	47	0.977397	46.8	0.881024	47	0.952445	47	0.825127	47	0.926241	46.8	0.935821	47	0.984437	47	0.994685	46.8	0.631709	46.8	0.852443	47	0.784648	47	0.919548	47	0.942059	46.8	0.904392	47	0.906811	46.8	0.923312	47	0.972368
216600	47	47	0.859647	46.8	0.938466	46.8	0.929041	47	0.971406	47	0.961907	47	0.977571	46.8	0.978353	47	0.977114	47	0.880016	47	0.957494	46.8	0.812628	47	0.922708	47	0.933834	46.8	0.985208	47	0.988285	47	0.629611	47	0.850934	47	0.794067	47	0.917805	46.8	0.9384	47	0.899114	47	0.905051	46.8	0.91609	46.8	0.971763
218400	47	46.8	0.857018	46.8	0.945039	46.8	0.909351	46.8	0.970621	47	0.972985	47	0.976506	46.8	0.981025	47	0.976738	47	0.879814	47	0.963013	46.8	0.804978	47	0.923549	47	0.925664	47	0.981435	47	0.989044	47	0.630056	47	0.858826	47	0.783792	47	0.920036	46.8	0.939179	47	0.901966	47	0.909589	46.8	0.912937	46.8	0.970956
220200	46.9	46.7	0.857383	46.7	0.948255	46.7	0.925056	46.7	0.970385	46.7	0.975317	46.7	0.972246	46.8	0.974597	46.7	0.977397	46.7	0.878201	46.7	0.949979	46.8	0.821679	46.7	0.921783	46.8	0.926179	46.8	0.987695	46.7	0.997614	46.8	0.631328	46.8	0.855112	46.8	0.787034	46.7	0.920733	46.7	0.939359	46.8	0.909731	46.7	0.902703	46.8	0.914768	46.7	0.967527
222000	46.9	46.7	0.858259	46.7	0.954968	46.7	0.927215	46.7	0.96795	46.8	0.968321	46.7	0.982163	46.8	0.979205	46.8	0.975231	46.8	0.870538	46.7	0.953561	46.7	0.803038	46.8	0.919933	46.7	0.919629	46.7	0.987309	46.7	0.986007	46.7	0.629293	46.7	0.853371	46.7	0.781254	46.7	0.919897	46.7	0.935041	46.7	0.902633	46.8	0.904268	46.7	0.910801	46.7	0.970553
223800	46.9	46.8	0.855557	46.8	0.940004	46.7	0.910978	46.7	0.965672	46.8	0.960871	46.8	0.98183	46.7	0.971538	46.7	0.97589	46.7	0.871748	46.8	0.956672	46.7	0.807348	46.7	0.916064	46.7	0.927872	46.8	0.989925	46.8	0.99078	46.8	0.629038	46.7	0.857375	46.8	0.78792	46.8	0.920315	46.7	0.934141	46.7	0.909367	46.7	0.90376	46.8	0.908462	46.7	0.970553
225600	46.9	46.8	0.856287	46.7	0.944409	46.7	0.923629	46.7	0.967557	46.8	0.961583	46.7	0.970915	46.7	0.976185	46.7	0.971087	46.8	0.871748	46.7	0.955028	46.7	0.803254	46.7	0.918167	46.8	0.922279	46.7	0.989667	46.8	0.992082	46.8	0.628084	46.8	0.8496	46.8	0.778624	46.8	0.922407	46.7	0.93624	46.8	0.903482	46.8	0.905246	46.7	0.909479	46.7	0.965309
227400	46.9	46.7	0.850665	46.8	0.938326	46.8	0.921304	46.7	0.962687	46.7	0.969357	46.7	0.972512	46.7	0.97541	46.7	0.978904	46.7	0.870135	46.7	0.954559	46.8	0.797112	46.7	0.917157	46.7	0.925664	46.7	0.995327	46.7	0.992732	46.7	0.627258	46.7	0.85488	46.7	0.784434	46.7	0.920315	46.7	0.933061	46.7	0.894564	46.7	0.897735	46.8	0.909683	46.7	0.967527
229200	46.9	46.7	0.84935	46.7	0.943361	46.7	0.923396	46.8	0.966457	46.8	0.963592	46.8	0.9801	46.7	0.97483	46.8	0.979751	46.7	0.870337	46.8	0.963952	46.7	0.786553	46.8	0.918755	46.7	0.919776	46.7	0.983022	46.8	0.98579	46.7	0.626367	46.7	0.848613	46.8	0.776116	46.7	0.918781	46.7	0.941459	46.7	0.899964	46.8	0.898322	46.8	0.910801	46.7	0.968536
231000	46.9	46.7	0.85103	46.8	0.941193	46.7	0.92592	46.7	0.964101	46.8	0.970718	46.7	0.979501	46.7	0.975914	46.7	0.97184	46.8	0.862472	46.7	0.952445	46.7	0.791186	46.7	0.914971	46.8	0.920144	46.7	0.990868	46.8	0.983729	46.8	0.629166	46.8	0.856563	46.8	0.778165	46.8	0.919409	46.8	0.9366	46.8	0.895474	46.8	0.895857	46.7	0.907445	46.7	0.964905
232800	46.9	46.7	0.847671	46.7	0.936578	46.7	0.921537	46.7	0.961901	46.8	0.965211	46.8	0.977571	46.7	0.977928	46.7	0.968827	46.8	0.863279	46.7	0.955205	46.7	0.797974	46.7	0.911354	46.8	0.92353	46.7	0.987095	46.8	0.987417	46.7	0.626367	46.7	0.855112	46.8	0.779602	46.8	0.915296	46.7	0.933061	46.7	0.902694	46.8	0.894762	46.7	0.909174	46.7	0.968334
234600	46.9	46.7	0.845115	46.7	0.942941	46.7	0.921337	46.8	0.964965	46.7	0.96249	46.7	0.973444	46.7	0.975333	46.8	0.975607	46.8	0.859851	46.7	0.958023	46.8	0.788708	46.8	0.912868	46.8	0.915287	46.8	0.988081	46.7	0.983621	46.8	0.626685	46.8	0.856156	46.8	0.776391	46.7	0.918851	46.8	0.933361	46.8	0.897719	46.8	0.891593	46.7	0.910801	46.7	0.963897
236400	46.9	46.7	0.848109	46.8	0.941263	46.7	0.921504	46.7	0.962529	46.8	0.969357	46.7	0.975241	46.7	0.975759	46.8	0.975796	46.8	0.860254	46.7	0.941056	46.7	0.7886	46.8	0.915559	46.8	0.91617	46.8	0.983751	46.8	0.983621	46.8	0.626304	46.7	0.850644	46.8	0.78055	46.8	0.913971	46.8	0.928863	46.7	0.894443	46.8	0.895544	46.7	0.903784	46.8	0.959056
238200	46.8	46.7	0.842705	46.7	0.932312	46.7	0.917951	46.7	0.964336	46.7	0.958409	46.7	0.979168	46.7	0.96813	46.7	0.979846	46.7	0.859649	46.7	0.951095	46.7	0.788708	46.7	0.912027	46.7	0.921616	46.7	0.982379	46.7	0.980367	46.7	0.623696	46.7	0.864454	46.7	0.778165	46.7	0.916481	46.7	0.933781	46.7	0.892502	46.7	0.890028	46.7	0.899512	46.7	0.96188
240000	46.8	46.7	0.84621	46.7	0.935459	46.7	0.921902	46.7	0.961273	46.7	0.961519	46.7	0.96985	46.7	0.979515	46.7	0.96958	46.7	0.858439	46.7	0.952387	46.7	0.786876	46.7	0.911018	46.7	0.913962	46.7	0.992111	46.7	0.981668	46.7	0.624714	46.7	0.850934	46.7	0.776667	46.7	0.91662	46.7	0.931322	46.7	0.895717	46.7	0.8984	46.7	0.901749	46.7	0.962283
241800	46.8	46.7	0.84475	46.7	0.935599	46.7	0.913435	46.7	0.957973	46.7	0.964239	46.7	0.980233	46.7	0.973745	46.7	0.970333	46.7	0.854204	46.7	0.952034	46.7	0.779334	46.7	0.90841	46.7	0.920365	46.7	0.990739	46.7	0.98796	46.7	0.625795	46.7	0.857549	46.7	0.776269	46.7	0.915714	46.7	0.930542	46.7	0.894868	46.7	0.89351	46.7	0.910395	46.7	0.961476
243600	46.8	46.7	0.840222	46.7	0.940634	46.7	0.920375	46.7	0.960408	46.7	0.963592	46.7	0.974576	46.7	0.975991	46.7	0.968073	46.7	0.856221	46.7	0.945576	46.7	0.778364	46.7	0.909083	46.7	0.906307	46.7	0.990225	46.7	0.984705	46.7	0.623442	46.7	0.848961	46.7	0.776024	46.7	0.919548	46.7	0.926464	46.7	0.888134	46.7	0.892688	46.7	0.897376	46.7	0.962687
245400	46.8	46.7	0.841536	46.7	0.930914	46.7	0.91732	46.7	0.959859	46.7	0.964758	46.7	0.976306	46.7	0.971732	46.7	0.975419	46.7	0.854204	46.7	0.954324	46.7	0.776748	46.7	0.903364	46.7	0.913888	46.7	0.990653	46.7	0.989153	46.7	0.621979	46.7	0.845248	46.7	0.77156	46.7	0.917666	46.7	0.926643	46.7	0.891228	46.7	0.893079	46.7	0.899817	46.7	0.955224
247200	46.8	46.7	0.840222	46.7	0.933781	46.7	0.908454	46.7	0.963394	46.7	0.953421	46.7	0.971647	46.7	0.969718	46.7	0.96845	46.7	0.853398	46.7	0.942406	46.7	0.776102	46.7	0.904458	46.7	0.909104	46.7	0.993955	46.7	0.982753	46.7	0.624014	46.7	0.848555	46.7	0.777125	46.7	0.914529	46.7	0.926404	46.7	0.89505	46.7	0.88545	46.7	0.898291	46.7	0.951997
249000	46.8	46.7	0.838323	46.7	0.924341	46.7	0.917021	46.7	0.961115	46.7	0.963332	46.7	0.966722	46.7	0.967124	46.7	0.964306	46.7	0.853801	46.7	0.948629	46.7	0.77524	46.7	0.906897	46.7	0.915581	46.7	0.994298	46.7	0.975268	46.7	0.62306	46.7	0.852849	46.7	0.774465	46.7	0.916202	46.7	0.927603	46.7	0.892259	46.7	0.892297	46.7	0.895138	46.7	0.958249
250800	46.8	46.7	0.841536	46.7	0.933991	46.7	0.914995	46.7	0.962529	46.7	0.962879	46.7	0.976173	46.7	0.97057	46.7	0.965342	46.7	0.851583	46.7	0.958903	46.7	0.76662	46.7	0.901262	46.7	0.915655	46.7	0.989024	46.7	0.985682	46.7	0.625032	46.7	0.85047	46.7	0.774312	46.7	0.91432	46.7	0.924544	46.7	0.888862	46.7	0.889597	46.7	0.892697	46.7	0.959056
252600	46.8	46.7	0.835987	46.7	0.9349	46.7	0.911476	46.7	0.95868	46.7	0.954263	46.7	0.974908	46.7	0.972467	46.7	0.95404	46.7	0.848357	46.7	0.950625	46.7	0.773516	46.7	0.899579	46.7	0.910208	46.7	0.987652	46.7	0.984272	46.7	0.621152	46.7	0.850876	46.7	0.780367	46.7	0.915784	46.7	0.919566	46.7	0.88959	46.7	0.886546	46.7	0.892901	46.7	0.95361
254400	46.8	46.7	0.834599	46.7	0.922103	46.7	0.911642	46.7	0.960723	46.7	0.960158	46.7	0.970383	46.7	0.968905	46.7	0.961763	46.7	0.84997	46.7	0.956614	46.7	0.757246	46.7	0.903953	46.7	0.908147	46.7	0.990053	46.7	0.983621	46.7	0.62147	46.7	0.841592	46.7	0.772844	46.7	0.918084	46.7	0.929343	46.7	0.88595	46.7	0.884864	46.7	0.895952	46.7	0.956232
256200	46.7	46.7	0.83438	46.7	0.935389	46.6	0.900983	46.6	0.957895	46.7	0.954781	46.6	0.974176	46.6	0.969486	46.6	0.967037	46.7	0.852188	46.7	0.941173	46.7	0.761879	46.7	0.900252	46.7	0.899389	46.7	0.984308	46.7	0.983404	46.7	0.622297	46.6	0.855054	46.7	0.777706	46.7	0.91913	46.7	0.925684	46.6	0.88686	46.7	0.888776	46.6	0.892901	46.6	0.955426
258000	46.7	46.6	0.833723	46.6	0.933851	46.7	0.913235	46.6	0.95978	46.7	0.960417	46.6	0.969717	46.6	0.964258	46.7	0.965059	46.6	0.845937	46.6	0.948688	46.7	0.765435	46.7	0.899327	46.7	0.902554	46.7	0.986194	46.7	0.980692	46.7	0.621343	46.7	0.855924	46.7	0.782324	46.7	0.918293	46.6	0.921005	46.7	0.890621	46.7	0.880873	46.6	0.886798	46.6	0.952602
259800	46.7	46.7	0.833358	46.6	0.92497	46.7	0.913667	46.7	0.959152	46.7	0.944675	46.7	0.973311	46.7	0.971693	46.7	0.966284	46.7	0.843517	46.7	0.940527	46.6	0.753367	46.7	0.897561	46.6	0.896445	46.6	0.98851	46.6	0.982861	46.6	0.621089	46.7	0.835267	46.6	0.776116	46.6	0.918572	46.7	0.919626	46.7	0.887709	46.6	0.883768	46.7	0.890663	46.7	0.955022
261600	46.7	46.6	0.83124	46.7	0.919656	46.6	0.910446	46.7	0.956009	46.7	0.957632	46.7	0.967787	46.7	0.965149	46.7	0.964777	46.7	0.846743	46.7	0.946692	46.6	0.74604	46.6	0.894617	46.7	0.899904	46.7	0.98821	46.6	0.976353	46.7	0.619181	46.7	0.843507	46.7	0.777951	46.7	0.914598	46.7	0.919866	46.6	0.884433	46.7	0.881304	46.6	0.889443	46.7	0.954014
263400	46.7	46.7	0.832335	46.6	0.931823	46.7	0.907757	46.7	0.956952	46.6	0.961583	46.6	0.96772	46.7	0.967046	46.6	0.962987	46.6	0.844727	46.7	0.950743	46.7	0.756815	46.6	0.895374	46.6	0.901524	46.6	0.994984	46.6	0.977004	46.7	0.620707	46.7	0.852211	46.6	0.780428	46.6	0.916341	46.7	0.917826	46.6	0.887527	46.6	0.883612	46.7	0.891985	46.7	0.948971
265200	46.7	46.6	0.830583	46.6	0.928606	46.7	0.909151	46.7	0.959152	46.6	0.948886	46.7	0.972047	46.6	0.96724	46.7	0.963176	46.6	0.844122	46.7	0.941995	46.6	0.750027	46.7	0.899243	46.6	0.897623	46.7	0.994469	46.6	0.982319	46.6	0.618354	46.7	0.838575	46.6	0.780214	46.6	0.913553	46.7	0.927483	46.7	0.885222	46.6	0.884238	46.7	0.889849	46.7	0.948971
267000	46.7	46.7	0.828246	46.7	0.921124	46.7	0.900684	46.7	0.960958	46.7	0.947266	46.7	0.97391	46.7	0.964181	46.7	0.960821	46.6	0.843315	46.7	0.947044	46.7	0.742916	46.7	0.894113	46.6	0.895341	46.6	0.989539	46.7	0.968869	46.6	0.619944	46.6	0.84078	46.6	0.767095	46.6	0.912646	46.7	0.915307	46.6	0.885829	46.6	0.884081	46.6	0.884662	46.7	0.946954
268800	46.7	46.7	0.829999	46.6	0.920845	46.7	0.909483	46.6	0.95813	46.7	0.951736	46.7	0.972446	46.7	0.967782	46.7	0.961104	46.6	0.844323	46.7	0.938355	46.6	0.744855	46.6	0.89201	46.7	0.894237	46.6	0.990911	46.6	0.976462	46.7	0.617782	46.7	0.849716	46.7	0.781498	46.6	0.915714	46.7	0.919506	46.7	0.883645	46.7	0.881851	46.7	0.882832	46.7	0.946753
270600	46.7	46.7	0.827443	46.7	0.919866	46.7	0.904602	46.7	0.956952	46.7	0.955364	46.6	0.961997	46.6	0.966853	46.7	0.96035	46.6	0.841904	46.6	0.936829	46.6	0.740437	46.7	0.892262	46.6	0.89593	46.6	1	46.7	0.976136	46.6	0.619753	46.6	0.847685	46.7	0.770336	46.7	0.915086	46.6	0.915247	46.6	0.881279	46.7	0.877978	46.6	0.884662	46.6	0.945341
272400	46.7	46.6	0.824084	46.7	0.931893	46.7	0.897231	46.6	0.956795	46.6	0.952449	46.7	0.969784	46.7	0.96542	46.6	0.954794	46.6	0.843718	46.7	0.931779	46.7	0.744316	46.6	0.89344	46.7	0.893133	46.7	0.992754	46.6	0.975702	46.7	0.618481	46.6	0.844145	46.6	0.768807	46.6	0.911601	46.7	0.917226	46.6	0.880854	46.6	0.881343	46.7	0.884052	46.7	0.946753
274200	46.6	46.6	0.82328	46.5	0.920985	46.5	0.907292	46.5	0.957423	46.6	0.942796	46.6	0.97198	46.5	0.963561	46.6	0.961575	46.6	0.844727	46.6	0.927318	46.5	0.733649	46.6	0.890833	46.5	0.891735	46.6	0.994426	46.6	0.976353	46.5	0.6174	46.6	0.84223	46.6	0.768746	46.6	0.914459	46.5	0.915067	46.6	0.878428	46.6	0.878213	46.5	0.878865	46.6	0.943929
276000	46.6	46.6	0.823864	46.6	0.913013	46.6	0.895438	46.6	0.953967	46.6	0.949469	46.5	0.968519	46.5	0.966659	46.6	0.958278	46.5	0.844928	46.6	0.943345	46.5	0.743778	46.6	0.886964	46.5	0.899168	46.6	0.988038	46.6	0.970604	46.5	0.618863	46.5	0.83637	46.6	0.765352	46.6	0.911182	46.6	0.913028	46.5	0.87861	46.5	0.878409	46.5	0.875407	46.6	0.941307
277800	46.6	46.5	0.820505	46.5	0.922593	46.5	0.901116	46.5	0.954046	46.5	0.941047	46.6	0.970982	46.6	0.954229	46.5	0.950932	46.6	0.84271	46.6	0.941525	46.6	0.732895	46.5	0.887048	46.6	0.891588	46.6	0.990911	46.6	0.971797	46.6	0.615111	46.6	0.839155	46.6	0.764587	46.6	0.91425	46.6	0.916987	46.6	0.875576	46.6	0.87121	46.6	0.881001	46.6	0.939693
279600	46.6	46.5	0.82255	46.6	0.918397	46.6	0.906063	46.6	0.954517	46.5	0.951542	46.6	0.968785	46.6	0.957636	46.6	0.956206	46.5	0.843517	46.6	0.928903	46.6	0.74367	46.6	0.885786	46.5	0.883565	46.6	0.991211	46.5	0.969736	46.5	0.617464	46.5	0.841766	46.5	0.773211	46.5	0.909997	46.6	0.916207	46.5	0.876426	46.5	0.877039	46.6	0.880797	46.6	0.939492
281400	46.6	46.6	0.820286	46.5	0.924411	46.6	0.910446	46.6	0.954438	46.6	0.947331	46.6	0.966323	46.6	0.958721	46.6	0.962422	46.5	0.840089	46.6	0.930488	46.5	0.732787	46.6	0.890496	46.5	0.887687	46.5	0.988767	46.5	0.974184	46.5	0.618163	46.5	0.842811	46.5	0.771804	46.5	0.912298	46.6	0.911708	46.5	0.879944	46.5	0.873518	46.5	0.881814	46.6	0.943122
283200	46.6	46.5	0.822112	46.6	0.923152	46.6	0.898659	46.5	0.953496	46.5	0.950181	46.6	0.964992	46.6	0.960076	46.5	0.947824	46.6	0.842105	46.6	0.934715	46.6	0.7274	46.5	0.887889	46.6	0.887981	46.6	0.990396	46.6	0.974835	46.6	0.615747	46.5	0.830916	46.6	0.768502	46.6	0.912158	46.6	0.915967	46.5	0.873271	46.5	0.873557	46.6	0.874593	46.5	0.938887
285000	46.6	46.5	0.819045	46.5	0.907139	46.5	0.903772	46.6	0.953103	46.6	0.947525	46.6	0.97005	46.5	0.949001	46.6	0.957337	46.6	0.840694	46.6	0.934774	46.6	0.731602	46.6	0.885029	46.6	0.894384	46.6	0.988252	46.6	0.969953	46.6	0.616764	46.6	0.839329	46.6	0.775627	46.6	0.909927	46.5	0.909969	46.6	0.873332	46.6	0.868471	46.5	0.878255	46.6	0.937071
286800	46.6	46.6	0.819118	46.5	0.905881	46.6	0.897098	46.5	0.949882	46.6	0.94312	46.6	0.963394	46.6	0.955739	46.6	0.96101	46.5	0.837871	46.6	0.924852	46.6	0.727616	46.5	0.882759	46.5	0.894532	46.6	0.989967	46.6	0.959865	46.5	0.613966	46.6	0.833353	46.6	0.770795	46.6	0.912089	46.6	0.909969	46.5	0.877214	46.5	0.866163	46.6	0.874085	46.6	0.939492
288600	46.6	46.6	0.817876	46.5	0.919097	46.5	0.90779	46.6	0.955067	46.5	0.93256	46.6	0.9598	46.5	0.959805	46.6	0.951874	46.6	0.841299	46.6	0.940351	46.6	0.71447	46.6	0.88217	46.6	0.889159	46.5	0.996013	46.5	0.96377	46.6	0.61333	46.6	0.835848	46.5	0.766972	46.5	0.913762	46.6	0.910449	46.6	0.86678	46.5	0.862368	46.6	0.881814	46.6	0.931827
290400	46.6	46.5	0.818169	46.5	0.90623	46.5	0.902842	46.5	0.950511	46.5	0.938779	46.6	0.970649	46.6	0.955894	46.6	0.954794	46.6	0.837266	46.6	0.930899	46.5	0.724922	46.6	0.88217	46.6	0.892912	46.6	0.991554	46.6	0.969519	46.6	0.615365	46.6	0.832424	46.6	0.772569	46.6	0.915226	46.6	0.912488	46.6	0.87861	46.6	0.870975	46.6	0.874085	46.6	0.935458
292200	46.5	46.5	0.814298	46.5	0.920006	46.5	0.889494	46.5	0.953103	46.5	0.940269	46.5	0.969052	46.3	0.950743	46.5	0.958373	46.3	0.837871	46.5	0.932836	46.3	0.722875	46.5	0.880992	46.5	0.886951	46.3	0.987909	46.5	0.961493	46.5	0.612885	46.3	0.842114	46.5	0.771896	46.5	0.913971	46.5	0.916447	46.3	0.873332	46.5	0.865616	46.3	0.879068	46.5	0.934046
294000	46.5	46.3	0.815394	46.3	0.917279	46.3	0.897729	46.5	0.953967	46.5	0.944545	46.5	0.962928	46.5	0.953996	46.5	0.951309	46.5	0.838677	46.5	0.935126	46.5	0.71975	46.3	0.882086	46.5	0.886436	46.5	0.989324	46.5	0.964313	46.5	0.615047	46.5	0.841128	46.5	0.764343	46.5	0.913344	46.5	0.917107	46.5	0.87048	46.3	0.865811	46.5	0.873881	46.5	0.931827
295800	46.5	46.5	0.813495	46.3	0.920145	46.5	0.88956	46.5	0.94894	46.5	0.933402	46.5	0.966057	46.3	0.955352	46.5	0.950744	46.5	0.838879	46.5	0.940938	46.3	0.719104	46.5	0.878553	46.5	0.884228	46.3	0.986709	46.3	0.962686	46.5	0.615301	46.6	0.837879	46.3	0.774128	46.3	0.912437	46.5	0.908949	46.5	0.870056	46.5	0.863894	46.3	0.876017	46.5	0.932231
297600	46.5	46.3	0.811377	46.5	0.922873	46.5	0.897131	46.5	0.950589	46.5	0.947201	46.5	0.958802	46.3	0.95752	46.3	0.950179	46.5	0.841299	46.3	0.929607	46.5	0.716194	46.3	0.882338	46.3	0.877456	46.5	0.990996	46.3	0.963554	46.3	0.612249	46.3	0.850528	46.3	0.770489	46.3	0.912925	46.3	0.910988	46.3	0.864293	46.5	0.87121	46.5	0.870016	46.3	0.925373
299400	46.5	46.3	0.813057	46.5	0.915041	46.3	0.895039	46.3	0.947526	46.5	0.936318	46.3	0.959002	46.3	0.949659	46.3	0.952063	46.5	0.839484	46.5	0.92538	46.5	0.713393	46.3	0.876367	46.5	0.873776	46.5	0.989496	46.5	0.965289	46.5	0.61263	46.5	0.84606	46.5	0.758563	46.5	0.913065	46.5	0.909609	46.5	0.869631	46.5	0.868706	46.5	0.872661	46.3	0.928197
301200	46.5	46.3	0.811669	46.3	0.921474	46.3	0.892117	46.5	0.946661	46.3	0.944027	46.5	0.964459	46.3	0.953996	46.3	0.949991	46.5	0.84029	46.5	0.92949	46.5	0.721043	46.3	0.878722	46.5	0.873482	46.5	0.992411	46.5	0.961926	46.5	0.612312	46.5	0.835964	46.5	0.762324	46.5	0.912646	46.5	0.912848	46.5	0.872118	46.5	0.860021	46.5	0.871135	46.3	0.929609
303000	46.5	46.5	0.810574	46.3	0.911615	46.3	0.894475	46.3	0.952082	46.5	0.945906	46.5	0.9598	46.3	0.951053	46.5	0.946129	46.5	0.839484	46.5	0.941995	46.5	0.708437	46.5	0.878049	46.5	0.871274	46.5	0.985894	46.5	0.962794	46.5	0.613139	46.5	0.839039	46.5	0.762141	46.5	0.913483	46.5	0.90745	46.5	0.868479	46.5	0.865107	46.5	0.870118	46.5	0.927592
304800	46.5	46.5	0.808894	46.3	0.911754	46.5	0.89391	46.3	0.945954	46.5	0.937095	46.3	0.961664	46.5	0.954112	46.5	0.950744	46.5	0.839484	46.5	0.926202	46.5	0.713285	46.3	0.875862	46.5	0.878855	46.5	0.987481	46.5	0.965072	46.5	0.611168	46.5	0.834339	46.5	0.760948	46.5	0.909161	46.5	0.90715	46.5	0.867265	46.3	0.867024	46.5	0.873373	46.3	0.927592
306600	46.5	46.5	0.805754	46.5	0.912803	46.3	0.886173	46.5	0.949332	46.5	0.938909	46.3	0.959268	46.3	0.953919	46.5	0.954417	46.5	0.837467	46.3	0.938003	46.3	0.712962	46.5	0.876871	46.5	0.881504	46.5	0.981907	46.5	0.956828	46.5	0.612503	46.5	0.840432	46.5	0.760612	46.5	0.909091	46.3	0.90715	46.5	0.865931	46.5	0.859082	46.3	0.872356	46.3	0.924566
308400	46.5	46.5	0.808164	46.3	0.903713	46.3	0.893711	46.5	0.946819	46.5	0.941565	46.3	0.960466	46.3	0.949117	46.5	0.952063	46.5	0.834644	46.3	0.936887	46.3	0.709299	46.5	0.874853	46.5	0.873703	46.5	0.991425	46.5	0.957913	46.5	0.611422	46.5	0.838807	46.5	0.760245	46.5	0.912298	46.3	0.902831	46.5	0.862776	46.5	0.860647	46.3	0.864626	46.3	0.922146
310200	46.4	46.2	0.807288	46.2	0.909657	46.2	0.882953	46.2	0.943284	46.3	0.94176	46.2	0.958869	46.2	0.946639	46.2	0.947542	46.3	0.838274	46.2	0.920155	46.2	0.702295	46.2	0.871993	46.3	0.871716	46.2	0.983493	46.3	0.957371	46.3	0.610659	46.3	0.845712	46.3	0.761346	46.3	0.910346	46.2	0.90661	46.2	0.871026	46.3	0.860843	46.2	0.865745	46.2	0.925373
312000	46.4	46.2	0.804586	46.3	0.908188	46.3	0.879732	46.2	0.944383	46.3	0.934309	46.2	0.957338	46.2	0.951789	46.2	0.945941	46.2	0.838677	46.2	0.923678	46.2	0.70682	46.3	0.871993	46.2	0.876132	46.3	0.993097	46.3	0.954333	46.2	0.608687	46.2	0.842347	46.3	0.76896	46.3	0.912298	46.2	0.90493	46.2	0.864171	46.2	0.855913	46.3	0.863202	46.2	0.923558
313800	46.4	46.2	0.80444	46.2	0.905671	46.2	0.893047	46.3	0.942498	46.3	0.928673	46.3	0.956206	46.3	0.949814	46.2	0.945658	46.3	0.839685	46.2	0.932425	46.3	0.701756	46.3	0.865601	46.3	0.870832	46.3	0.99374	46.2	0.9475	46.3	0.61104	46.3	0.834049	46.3	0.769847	46.2	0.909509	46.2	0.90523	46.3	0.864899	46.3	0.85783	46.2	0.864727	46.2	0.92376
315600	46.4	46.3	0.805535	46.2	0.911125	46.2	0.895537	46.2	0.944855	46.3	0.932366	46.2	0.958536	46.3	0.952215	46.2	0.946506	46.2	0.836056	46.2	0.936418	46.3	0.699063	46.3	0.87132	46.2	0.87098	46.2	0.984994	46.2	0.954442	46.3	0.610786	46.3	0.837356	46.2	0.769113	46.2	0.907697	46.3	0.901332	46.2	0.864414	46.2	0.856265	46.2	0.8631	46.3	0.916297
317400	46.4	46.2	0.801592	46.2	0.902804	46.2	0.892781	46.2	0.940534	46.3	0.93865	46.2	0.962396	46.3	0.952447	46.3	0.942739	46.3	0.837266	46.2	0.924089	46.2	0.695399	46.3	0.866274	46.3	0.863914	46.3	0.994984	46.3	0.954442	46.3	0.607988	46.2	0.841244	46.3	0.765107	46.3	0.909858	46.2	0.901991	46.2	0.865142	46.3	0.859004	46.2	0.862592	46.2	0.916902
319200	46.4	46.3	0.800204	46.3	0.905741	46.2	0.879665	46.2	0.948861	46.2	0.937873	46.3	0.953611	46.2	0.951247	46.3	0.947636	46.2	0.833434	46.2	0.929079	46.2	0.695938	46.3	0.870984	46.2	0.873261	46.2	0.98568	46.3	0.952923	46.2	0.60767	46.2	0.830567	46.3	0.762477	46.3	0.912507	46.2	0.902531	46.2	0.863443	46.3	0.852627	46.2	0.874085	46.2	0.919524
321000	46.4	46.3	0.802614	46.2	0.908678	46.2	0.876146	46.3	0.94454	46.2	0.936188	46.3	0.954343	46.3	0.944044	46.3	0.943586	46.3	0.835652	46.3	0.922856	46.2	0.691628	46.2	0.867788	46.3	0.867152	46.3	0.985937	46.2	0.957479	46.3	0.608624	46.3	0.834165	46.3	0.767645	46.2	0.909021	46.2	0.90619	46.2	0.856346	46.2	0.852862	46.3	0.862998	46.2	0.918516
322800	46.4	46.2	0.800643	46.2	0.910006	46.2	0.884115	46.2	0.94022	46.3	0.939039	46.2	0.958003	46.2	0.945361	46.2	0.945093	46.3	0.836459	46.2	0.920507	46.3	0.695615	46.2	0.867452	46.3	0.872378	46.2	0.987138	46.3	0.955201	46.3	0.610532	46.3	0.837821	46.2	0.761376	46.3	0.908324	46.3	0.90667	46.3	0.863989	46.3	0.860843	46.2	0.862592	46.2	0.916902
324600	46.4	46.3	0.800935	46.3	0.901545	46.3	0.889527	46.3	0.940691	46.2	0.937873	46.2	0.960466	46.2	0.948962	46.2	0.939442	46.2	0.840492	46.2	0.921153	46.2	0.696477	46.2	0.865685	46.2	0.871274	46.2	0.984051	46.2	0.944354	46.2	0.608051	46.2	0.837647	46.2	0.767309	46.2	0.908533	46.2	0.903191	46.2	0.854162	46.2	0.848832	46.3	0.858828	46.2	0.915894
326400	46.4	46.2	0.800862	46.3	0.90616	46.2	0.871132	46.2	0.942734	46.3	0.936966	46.2	0.955474	46.3	0.947762	46.2	0.942645	46.3	0.836661	46.2	0.93401	46.2	0.69777	46.3	0.866947	46.3	0.860087	46.2	0.982679	46.3	0.952272	46.3	0.608815	46.2	0.837298	46.2	0.762936	46.3	0.910764	46.2	0.902471	46.2	0.86223	46.2	0.852197	46.3	0.862083	46.2	0.91307
328200	46.3	46.2	0.799036	46.2	0.909167	46.2	0.890291	46.2	0.946269	46.2	0.939363	46.2	0.960732	46.2	0.949853	46.2	0.944905	46.2	0.836056	46.2	0.925791	46.2	0.684625	46.2	0.86762	46.2	0.86649	46.2	0.98658	46.2	0.944896	46.2	0.604872	46.2	0.840316	46.2	0.756911	46.2	0.908533	46.2	0.898932	46.2	0.861259	46.2	0.852392	46.2	0.858828	46.2	0.917507
330000	46.3	46.2	0.798744	46.2	0.90623	46.2	0.878868	46.2	0.941477	46.2	0.931265	46.2	0.960732	46.2	0.938236	46.2	0.940008	46.2	0.835047	46.2	0.929842	46.2	0.68581	46.2	0.86577	46.2	0.866711	46.2	0.990653	46.2	0.945439	46.2	0.604999	46.2	0.828595	46.2	0.755719	46.2	0.908533	46.2	0.899772	46.2	0.857983	46.2	0.85071	46.2	0.855065	46.2	0.912061
331800	46.3	46.2	0.795093	46.2	0.904902	46.2	0.883583	46.2	0.941005	46.2	0.929969	46.2	0.95228	46.2	0.942302	46.2	0.940761	46.2	0.834644	46.2	0.931956	46.2	0.69583	46.2	0.864508	46.2	0.859866	46.2	0.985294	46.2	0.953032	46.2	0.606461	46.2	0.838285	46.2	0.76055	46.2	0.908882	46.2	0.900192	46.2	0.853737	46.2	0.853175	46.2	0.853438	46.2	0.912263
333600	46.3	46.2	0.796699	46.2	0.894972	46.2	0.87495	46.2	0.939906	46.2	0.934892	46.2	0.962396	46.2	0.944509	46.2	0.949896	46.2	0.838475	46.2	0.932719	46.2	0.686133	46.2	0.860723	46.2	0.869434	46.2	0.986452	46.2	0.944679	46.2	0.606907	46.2	0.832134	46.2	0.758899	46.2	0.909997	46.2	0.90685	46.2	0.86314	46.2	0.856187	46.2	0.854455	46.2	0.912465
335400	46.3	46.2	0.79743	46.2	0.894833	46.2	0.884015	46.2	0.944383	46.2	0.92958	46.2	0.959201	46.2	0.941798	46.2	0.942174	46.2	0.839282	46.2	0.928903	46.2	0.687749	46.2	0.864256	46.2	0.866196	46.2	0.984694	46.2	0.945439	46.2	0.605571	46.2	0.838517	46.2	0.761835	46.2	0.909997	46.2	0.898452	46.2	0.85222	46.2	0.846993	46.2	0.851505	46.2	0.909439
337200	46.3	46.2	0.798525	46.2	0.90616	46.2	0.887037	46.2	0.943912	46.2	0.93256	46.2	0.950815	46.2	0.941992	46.2	0.941797	46.2	0.840694	46.2	0.927494	46.2	0.690982	46.2	0.862237	46.2	0.866343	46.2	0.993054	46.2	0.946307	46.2	0.606398	46.2	0.833933	46.2	0.764251	46.2	0.913344	46.2	0.896413	46.2	0.860531	46.2	0.845624	46.2	0.860252	46.2	0.912465
339000	46.3	46.2	0.797722	46.2	0.903923	46.2	0.875814	46.2	0.941791	46.2	0.930163	46.2	0.963661	46.2	0.941527	46.2	0.940949	46.2	0.837266	46.2	0.932778	46.2	0.679991	46.2	0.86148	46.2	0.86649	46.2	0.986109	46.2	0.943812	46.2	0.60608	46.2	0.839968	46.2	0.758654	46.2	0.907975	46.2	0.897493	46.2	0.854526	46.2	0.849889	46.2	0.852828	46.2	0.908834
340800	46.3	46.2	0.79721	46.2	0.907839	46.2	0.891353	46.2	0.940063	46.2	0.918826	46.2	0.957072	46.2	0.936803	46.2	0.94434	46.2	0.831418	46.2	0.928198	46.2	0.695076	46.2	0.863162	46.2	0.865754	46.2	0.985165	46.2	0.940991	46.2	0.60449	46.2	0.833411	46.2	0.75211	46.2	0.905884	46.2	0.899352	46.2	0.855982	46.2	0.851532	46.2	0.853438	46.2	0.907221
342600	46.3	46.2	0.794362	46.2	0.902384	46.2	0.887435	46.2	0.940141	46.2	0.923879	46.2	0.953278	46.2	0.945555	46.2	0.937936	46.2	0.836862	46.2	0.921623	46.2	0.68581	46.2	0.859294	46.2	0.860896	46.2	0.984694	46.2	0.947066	46.2	0.602964	46.2	0.834571	46.2	0.760092	46.2	0.909858	46.2	0.897373	46.2	0.858287	46.2	0.851532	46.2	0.85598	46.2	0.910246
344400	46.3	46.2	0.792099	46.2	0.893084	46.2	0.889228	46.2	0.942105	46.2	0.931848	46.2	0.954409	46.2	0.942379	46.2	0.942268	46.2	0.833636	46.2	0.924734	46.2	0.684732	46.2	0.86291	46.2	0.863988	46.2	0.989882	46.2	0.941208	46.2	0.604681	46.2	0.829059	46.2	0.764771	46.2	0.911461	46.2	0.899052	46.2	0.856467	46.2	0.84895	46.2	0.849776	46.2	0.910649
346200	46.2	46.2	0.797576	46.1	0.907209	46.2	0.876212	46.2	0.939042	46.1	0.925434	46.1	0.955674	46.2	0.941217	46.1	0.935769	46.1	0.835249	46.2	0.922797	46.2	0.684194	46.1	0.863751	46.1	0.858468	46.1	0.992797	46.1	0.945873	46.1	0.603154	46.2	0.832656	46.1	0.754281	46.1	0.911949	46.2	0.899112	46.2	0.85762	46.1	0.847854	46.2	0.858727	46.2	0.907019
348000	46.2	46.2	0.794801	46.2	0.905811	46.2	0.88707	46.2	0.939277	46.2	0.919798	46.2	0.956606	46.2	0.94176	46.2	0.934733	46.1	0.836257	46.2	0.922151	46.1	0.688288	46.2	0.858537	46.1	0.863767	46.1	0.983922	46.2	0.944788	46.1	0.6029	46.1	0.828363	46.1	0.754281	46.2	0.908603	46.2	0.896893	46.1	0.856649	46.1	0.849263	46.1	0.848861	46.2	0.906616
349800	46.2	46.2	0.791222	46.2	0.894833	46.2	0.883185	46.2	0.936292	46.2	0.932625	46.2	0.956539	46.1	0.93506	46.1	0.929177	46.2	0.836862	46.2	0.936476	46.2	0.682577	46.1	0.857611	46.2	0.861117	46.2	0.982979	46.1	0.937195	46.2	0.601056	46.2	0.833469	46.2	0.751957	46.1	0.909858	46.1	0.896233	46.1	0.855982	46.1	0.850906	46.2	0.848352	46.1	0.904195
351600	46.2	46.2	0.791295	46.1	0.899028	46.2	0.88096	46.1	0.937942	46.2	0.931912	46.1	0.95614	46.1	0.940753	46.1	0.943021	46.1	0.834644	46.2	0.919568	46.2	0.686995	46.1	0.859294	46.1	0.858909	46.2	0.991811	46.1	0.940449	46.1	0.601755	46.1	0.839561	46.1	0.759541	46.1	0.910834	46.1	0.892574	46.1	0.851735	46.1	0.845546	46.2	0.851505	46.1	0.900565
353400	46.2	46.2	0.791953	46.2	0.903084	46.2	0.883816	46.2	0.937549	46.2	0.923296	46.1	0.962529	46.1	0.940327	46.2	0.93511	46.1	0.835249	46.1	0.931897	46.1	0.670186	46.2	0.859294	46.1	0.854125	46.1	0.989925	46.2	0.941425	46.1	0.6022	46.1	0.837937	46.1	0.75581	46.2	0.908185	46.1	0.897073	46.1	0.851128	46.2	0.848676	46.1	0.848759	46.1	0.902582
355200	46.2	46.1	0.791588	46.2	0.895392	46.1	0.872593	46.1	0.939827	46.2	0.931912	46.1	0.957671	46.1	0.939049	46.1	0.927293	46.2	0.837266	46.1	0.916926	46.1	0.682901	46.1	0.859378	46.2	0.862663	46.2	0.982979	46.2	0.941317	46.2	0.602646	46.1	0.840026	46.2	0.758379	46.2	0.911461	46.2	0.894134	46.2	0.854586	46.2	0.843238	46.2	0.847132	46.1	0.904195
357000	46.2	46.2	0.793048	46.2	0.889798	46.2	0.875647	46.2	0.940299	46.2	0.919798	46.2	0.955874	46.2	0.939707	46.2	0.935204	46.1	0.833233	46.2	0.918159	46.2	0.684625	46.2	0.85778	46.1	0.859277	46.1	0.987352	46.1	0.933181	46.1	0.603218	46.1	0.840432	46.1	0.758379	46.1	0.909161	46.1	0.895813	46.1	0.848398	46.1	0.844803	46.2	0.848759	46.1	0.903187
358800	46.2	46.2	0.789251	46.1	0.882106	46.2	0.868077	46.1	0.937078	46.2	0.924462	46.2	0.951481	46.1	0.933163	46.1	0.928329	46.2	0.836056	46.2	0.930077	46.2	0.678698	46.1	0.857696	46.2	0.857879	46.2	0.987309	46.2	0.940449	46.2	0.600929	46.2	0.823663	46.2	0.755015	46.2	0.906302	46.2	0.894434	46.2	0.850886	46.2	0.844607	46.2	0.846522	46.2	0.900565
360600	46.2	46.2	0.78947	46.2	0.900776	46.2	0.87163	46.2	0.940848	46.1	0.921677	46.2	0.947953	46.2	0.9363	46.2	0.925221	46.1	0.835652	46.2	0.933423	46.1	0.678052	46.2	0.857275	46.1	0.859645	46.1	0.98851	46.1	0.926565	46.2	0.601437	46.1	0.840548	46.1	0.756697	46.1	0.907836	46.2	0.894254	46.1	0.845426	46.2	0.848519	46.1	0.844996	46.2	0.901573
362400	46.2	46.1	0.789835	46.2	0.896651	46.2	0.882886	46.1	0.935664	46.1	0.92064	46.2	0.952146	46.2	0.937655	46.1	0.932191	46.1	0.833636	46.2	0.925909	46.1	0.684409	46.1	0.85349	46.1	0.859792	46.2	0.991211	46.2	0.939581	46.2	0.60201	46.1	0.838169	46.2	0.757584	46.2	0.910555	46.2	0.895633	46.2	0.84949	46.1	0.846954	46.2	0.842555	46.2	0.900968
364200	46.1	46.1	0.791368	46.1	0.899098	46	0.881857	46	0.936371	46.1	0.922584	46.1	0.961864	46.1	0.933937	46	0.935675	46.1	0.834846	46.1	0.918687	46	0.674281	46.1	0.85307	46.1	0.85729	46	0.990825	46.1	0.93969	46	0.599402	46	0.835964	46.1	0.754067	46.1	0.90693	46.1	0.893354	46	0.846275	46.1	0.838856	46	0.847132	46.1	0.899153
366000	46.1	46	0.789689	46	0.899168	46	0.878669	46	0.935271	46.1	0.922324	46.1	0.952413	46.1	0.935177	46	0.923997	46.1	0.839685	46	0.916456	46.1	0.681177	46	0.853238	46.1	0.85832	46.1	0.987095	46	0.933398	46.1	0.602137	46.1	0.837995	46.1	0.756636	46.1	0.909718	46	0.890955	46.1	0.849976	46.1	0.846602	46.1	0.843877	46	0.899556
367800	46.1	46	0.788155	46	0.893224	46	0.881558	46.1	0.93535	46.1	0.926082	46.1	0.949617	46.1	0.928826	46.1	0.924185	46.1	0.835451	46.1	0.92767	46.1	0.676005	46.1	0.85164	46.1	0.849194	46	0.980021	46	0.93687	46.1	0.598448	46.1	0.838459	46	0.755107	46	0.91188	46.1	0.894194	46.1	0.848095	46.1	0.84402	46	0.843979	46	0.896127
369600	46.1	46.1	0.787352	46	0.895532	46	0.874452	46	0.934171	46.1	0.932884	46.1	0.948486	46	0.931033	46.1	0.933415	46.1	0.836056	46.1	0.917983	46	0.679453	46.1	0.854415	46.1	0.846912	46	0.984051	46.1	0.925372	46.1	0.600229	46.1	0.833817	46.1	0.752385	46.1	0.908812	46.1	0.891255	46.1	0.848762	46.1	0.843668	46	0.840826	46	0.899355
371400	46.1	46.1	0.78633	46.2	0.894273	46.2	0.877872	46.1	0.934643	46.1	0.924333	46.1	0.950349	46.1	0.937151	46.1	0.922584	46	0.836862	46.1	0.921681	46	0.675897	46.1	0.852649	46	0.848679	46	0.979206	46	0.933507	46	0.59813	46	0.825693	46	0.750734	46	0.907906	46.1	0.897973	46	0.846154	46.1	0.83424	46	0.841538	46.1	0.895926
373200	46.1	46.1	0.784942	46.1	0.89742	46.1	0.888498	46.1	0.934643	46.1	0.922907	46.1	0.95594	46.1	0.935099	46.1	0.93916	46	0.837064	46.1	0.92356	46.1	0.68484	46	0.855341	46	0.857658	46	0.983451	46	0.934375	46	0.598003	46	0.8308	46	0.757034	46	0.90923	46.1	0.891255	46	0.846639	46	0.836743	46.1	0.842555	46.1	0.899556
375000	46.1	46	0.78465	46.1	0.891826	46.1	0.875249	46	0.934878	46.1	0.923102	46	0.945624	46	0.929988	46.1	0.932285	46.1	0.834644	46.1	0.926437	46.1	0.679345	46.1	0.854752	46.1	0.850077	46.1	0.981307	46.1	0.926131	46.1	0.596413	46.1	0.829001	46.1	0.758196	46.1	0.908673	46.1	0.888256	46	0.847246	46.1	0.842025	46.1	0.84286	46.1	0.897338
376800	46.1	46.1	0.785746	46.1	0.885812	46.1	0.863993	46	0.931736	46	0.912996	46.1	0.948286	46.1	0.94145	46.1	0.924562	46	0.835652	46.1	0.931016	46.1	0.684086	46	0.847098	46.1	0.848973	46.1	0.984351	46.1	0.930795	46.1	0.59883	46.1	0.823605	46.1	0.751988	46.1	0.90686	46.1	0.893714	46	0.846882	46	0.838269	46.1	0.840521	46	0.895724
378600	46.1	46.1	0.783263	46	0.880358	46	0.869571	46.1	0.9348	46.1	0.925175	46.1	0.953078	46	0.930491	46.1	0.927764	46.1	0.835047	46.1	0.925674	46	0.674173	46.1	0.850715	46.1	0.850004	46.1	0.986838	46.1	0.923094	46.1	0.595523	46.1	0.834745	46.1	0.754434	46.1	0.90679	46	0.894014	46.1	0.847246	46.1	0.833457	46	0.83991	46	0.900363
380400	46.1	46	0.783847	46.1	0.894413	46.1	0.866782	46.1	0.935664	46	0.923361	46.1	0.949151	46.1	0.933589	46.1	0.919005	46	0.835652	46.1	0.923795	46.1	0.677513	46.1	0.850378	46	0.842276	46	0.980621	46	0.933507	46	0.59724	46	0.828885	46	0.75581	46	0.908951	46.1	0.892214	46	0.841968	46	0.837213	46.1	0.842555	46.1	0.892699
[truncated: 1,062 more columns]

## Sheet: (d,e) Frac.,tot. growth time
pattern	Total on-target growth time	Total off-target growth time	Fraction growth time H	Fraction growth time A	Fraction growth time M	Total growth time
H flag 1	0.337243	0.189635	0.470276	0	0.529724	0.715977
H flag 2	0.857022	0.169519	0.715535	0.237946	0.0465188	1.19184
H flag 3	0.738117	0.212358	0.634757	0.352532	0.012711	1.16283
H flag 4	0.479837	0.165839	0.594542	0.106763	0.298695	0.818031
H flag 5	0.346826	0.365808	0.281342	0.20447	0.514188	1.01803
H flag 6	0.729377	0.0746397	0.828277	0	0.171723	0.869304
H flag 7	0.354492	0.0516406	0.765753	0	0.234247	0.440908
H flag 8	0.732597	0.0534805	0.872598	0	0.127402	0.839558
H flag 9	0.682919	0.370561	0.479564	0.204315	0.31612	1.42404
H flag 10	0.65624	0.106838	0.754371	0	0.245629	0.869917
H flag 11	0.313094	0.336063	0.317791	0.332669	0.349539	0.985219
H flag 12	0.255596	0.0548911	0.650664	0	0.349336	0.314259
A flag 1	0.692119	0.25759	0	0.573279	0.426721	1.2073
A flag 2	0.1544	0.244036	0.472724	0.201966	0.325311	0.611592
A flag 3	0.41889	0.137259	0.0287726	0.549698	0.421529	0.609629
A flag 4	0.16705	0.211408	0.0681445	0.292488	0.639368	0.597608
A flag 5	0.315394	0.262159	0.373842	0.311065	0.315094	0.761055
A flag 6	0.354492	0.141368	0	0.556304	0.443696	0.637228
A flag 7	0.40969	0.0106102	0	0.950754	0.0492457	0.430911
A flag 8	0.359092	0.194266	0.184988	0.480312	0.334701	0.747623
A flag 9	0.693959	0.0291322	0	0.922544	0.0774562	0.752223
A flag 10	0.716038	0.194143	0.0733644	0.648395	0.278241	1.10432
A flag 11	0.754676	0.0665133	0.0292939	0.850145	0.120561	0.887703
A flag 12	0.601963	0	0	1	0	0.601963
M flag 1	0.531585	0.105796	0.0284891	0.255578	0.715932	0.744864
M flag 2	0.317694	0.24011	0.216802	0.38947	0.393728	0.792088
M flag 3	0.0463048	0.126188	0.964604	0	0.0353962	0.261638
M flag 4	0.185449	0.0896657	0	0.493585	0.506415	0.363324
M flag 5	0.865072	0.0290095	0.0632099	0	0.93679	0.917878
M flag 6	0.205765	0.0314014	0	0.21979	0.78021	0.285741
M flag 7	0.1544	0.0375652	0	0.29697	0.70303	0.25299
M flag 8		0.103281	0.321853	0.678147	0	0.206562
M flag 9	0.646581	0	0	0	1	0.633241
M flag 10	0.523152	0	0	0	1	0.549525
M flag 11	0.67832	0	0	0	1	0.67832
M flag 12	0.518246	0.0148421	0	0.0541751	0.945825	0.54793
M flag 13	0.119902	0.0239804	0.120053	0.140007	0.73994	0.184422
noflag	0.181539	0.214903	0.277397	0.428653	0.29395	0.429807
