# Supplementary material for: Pattern recognition in the nucleation kinetics of non-equilibrium self-assembly
Source: Nature. 2024 Jan 17;625(7995):500–7. doi: 10.1038/s41586-023-06890-z (PMC10794147; doi:10.1038/s41586-023-06890-z)
Supplement: Supplementary file 5 — Source Data Fig. 5 [file 41586_2023_6890_MOESM5_ESM.xlsx]

## Sheet: (c) opt. pixel-tile map
493	223	570	741	334	49	545	472	701	740	602	556	138	658	519	71	120	109	9	413	689	688	457	440	460	452	902	732	882	733	-1
715	15	237	174	484	662	236	188	676	410	246	705	291	445	531	337	47	16	465	514	691	347	695	5	329	401	739	816	778	907	-1
565	750	254	286	209	400	541	436	532	530	309	574	663	94	238	124	561	132	332	272	633	253	369	411	683	91	93	770	843	874	-1
869	776	779	311	746	432	786	533	1	214	218	221	181	212	241	657	162	491	200	629	330	177	296	44	148	203	123	39	747	672	-1
725	854	142	18	777	165	59	220	331	68	98	219	55	51	684	257	749	290	73	605	509	793	343	57	674	365	175	248	207	601	281
850	835	825	693	317	41	168	119	315	194	430	473	196	81	829	125	435	139	328	160	116	595	127	185	364	35	274	422	524	821	528
883	890	886	703	785	163	492	838	881	866	707	659	4	635	578	106	156	738	807	859	217	225	384	137	372	338	548	525	563	504	836
860	656	834	307	77	437	769	760	911	134	471	534	831	888	619	809	799	113	873	730	789	894	279	244	243	301	557	264	668	546	252
813	802	358	893	586	463	17	790	488	915	710	892	380	867	862	336	734	728	392	810	812	723	720	169	67	518	477	376	522	649	631
696	375	880	150	145	158	256	319	801	692	568	646	823	842	781	832	903	818	736	79	144	551	419	359	421	666	22	3	628	553	173
21	521	186	485	655	386	879	805	345	112	344	709	110	806	861	905	407	851	178	729	853	872	554	517	183	46	648	58	536	708	306
56	912	755	36	297	321	794	748	298	833	40	456	76	909	346	824	913	469	146	204	89	908	841	584	157	249	393	24	638	626	643
788	783	431	62	289	537	280	240	398	773	898	273	371	182	768	884	171	448	352	396	462	172	42	13	75	130	101	550	255	195	539
25	798	239	52	466	767	719	154	566	443	72	23	271	64	479	677	489	516	450	475	7	191	612	607	820	353	639	147	694	260	863
87	846	414	387	645	543	342	102	891	265	143	402	233	613	90	592	63	454	31	687	822	685	482	717	20	406	599	357	585	266	761
897	427	38	295	856	671	481	742	335	374	361	70	467	32	745	845	844	868	852	66	14	916	722	555	614	152	651	579	208	170	544
762	562	285	322	259	476	415	711	483	572	447	815	679	634	726	721	564	630	0	625	906	287	598	644	610	251	318	205	258	247	227
827	153	341	231	86	425	716	590	439	604	496	292	849	791	803	910	914	617	706	96	108	499	495	131	698	382	141	2	904	193	428
889	65	704	615	166	510	529	737	487	682	53	29	354	735	800	901	837	877	351	277	302	433	535	458	383	288	587	140	593	84	636
796	857	486	654	743	538	349	43	642	275	418	588	370	547	686	549	480	660	78	623	373	19	508	665	198	366	282	151	426	149	759
887	840	847	128	675	606	215	494	381	83	673	661	620	826	718	637	261	697	303	640	500	8	114	284	294	111	340	573	206	82	830
731	103	871	526	627	360	388	250	714	542	670	680	713	752	865	870	591	724	192	490	576	409	104	222	262	356	819	105	478	45	-1
764	502	895	513	560	326	278	325	230	618	641	700	515	600	582	690	571	580	653	350	632	310	202	224	667	753	293	377	417	161	-1
772	864	197	811	609	80	187	455	11	596	276	348	678	313	828	559	558	763	507	97	511	95	405	92	501	506	180	503	121	314	-1
497	744	771	758	784	126	234	167	54	775	774	765	782	669	621	797	766	470	327	6	118	468	363	423	878	552	681	424	567	540	-1
896	839	876	395	858	498	267	216	316	464	624	814	27	603	900	808	885	727	176	474	583	33	616	85	10	664	652	505	283	527	-1
787	899	848	453	757	756	594	304	210	107	442	408	399	461	523	300	88	699	712	122	48	339	569	100	611	650	438	416	795	575	-1
780	622	855	133	817	389	792	129	34	164	394	60	117	577	323	201	333	199	434	581	268	446	379	74	702	589	229	155	429	136	-1
520	190	608	362	320	804	135	403	12	449	228	875	30	385	299	99	367	179	184	308	441	412	263	420	26	451	69	115	597	61	-1
28	459	444	754	269	751	391	213	235	512	397	312	37	245	270	324	390	378	189	211	159	305	226	647	50	404	355	242	232	368	-1

## Sheet: (d,e) px vals Hodgkin
0	0.111116	0.111116	0.111116	0.111116	0.111116	0	0	0	0	0	0	0.222217	0.333333	0.222217	0	0	0	0	0	0.222217	0.333333	0.333333	0.111116	0.111116	0	0.111116	0.333333	0.333333	0.333333	0
0.111116	0.111116	0.111116	0.111116	0.222217	0.111116	0	0	0	0	0	0.111116	0.222217	0.333333	0.222217	0.111116	0.111116	0	0	0	0.222217	0.333333	0.333333	0.222217	0.111116	0.111116	0.111116	0.333333	0.44445	0.44445	0
0.111116	0.111116	0.111116	0.111116	0.222217	0.111116	0	0	0	0	0.333333	0.44445	0.333333	0.222217	0.222217	0.111116	0.111116	0.111116	0	0	0.111116	0.333333	0.44445	0.222217	0.111116	0.111116	0.111116	0.333333	0.44445	0.44445	0
0.111116	0.111116	0.111116	0.222217	0.222217	0.222217	0.111116	0	0.222217	0.44445	0.55555	0.333333	0.222217	0.222217	0.222217	0.222217	0.111116	0	0	0	0	0	0.222217	0.333333	0.111116	0.111116	0.222217	0.333333	0.44445	0.44445	0
0.111116	0.111116	0.111116	0.222217	0.222217	0.222217	0.111116	0.222217	0.55555	0.666667	0.666667	0.44445	0.333333	0.333333	0.333333	0.222217	0.222217	0	0	0	0	0	0	0.222217	0.222217	0.111116	0.222217	0.333333	0.44445	0.44445	0
0.111116	0.111116	0.111116	0.222217	0.222217	0.111116	0.333333	0.55555	0.44445	0.55555	0.888884	0.55555	0.44445	0.333333	0.333333	0.222217	0.222217	0.111116	0	0	0	0	0	0.111116	0.222217	0.222217	0.222217	0.333333	0.55555	0.55555	0
0.111116	0.111116	0.222217	0.222217	0.222217	0.222217	0.666667	0.55555	0.44445	0.777783	0.888884	0.666667	0.44445	0.333333	0.222217	0.222217	0.222217	0.222217	0.111116	0	0	0.111116	0	0	0.111116	0.222217	0.222217	0.44445	0.55555	0.55555	0
0.111116	0.111116	0.222217	0.222217	0.111116	0.44445	0.777783	0.55555	0.777783	0.666667	0.666667	0.666667	0.44445	0.333333	0.333333	0.222217	0.333333	0.222217	0.222217	0.222217	0.111116	0.111116	0	0	0.111116	0.222217	0.222217	0.44445	0.55555	0.55555	0
0	0.111116	0.222217	0.111116	0.333333	0.55555	0.55555	0.666667	0.55555	0.55555	0.666667	0.777783	0.55555	0.333333	0.333333	0.333333	0.333333	0.333333	0.333333	0.222217	0.111116	0	0	0	0.111116	0.111116	0.333333	0.333333	0.55555	0.666667	0
0	0.111116	0.111116	0.333333	0.55555	0.55555	0.44445	0.44445	0.44445	0.666667	0.777783	0.666667	0.44445	0.333333	0.333333	0.44445	0.44445	0.44445	0.333333	0.222217	0.111116	0	0	0	0	0.111116	0.333333	0.44445	0.55555	0.666667	0
0	0.111116	0.222217	0.333333	0.44445	0.333333	0.222217	0.44445	0.777783	0.666667	0.666667	0.55555	0.55555	0.44445	0.55555	0.55555	0.55555	0.44445	0.333333	0.222217	0.111116	0	0	0	0	0	0.222217	0.44445	0.55555	0.666667	0
0.111116	0.222217	0.222217	0.44445	0.55555	0.111116	0	0.333333	1	0.777783	0.666667	0.666667	0.666667	0.777783	0.888884	0.888884	0.777783	0.55555	0.44445	0.333333	0.222217	0	0	0	0	0	0	0.333333	0.44445	0.55555	0
0	0.111116	0.333333	0.333333	0.333333	0.222217	0	0.222217	0.777783	0.777783	0.888884	0.888884	1	0.888884	0.777783	0.777783	0.666667	0.666667	0.44445	0.44445	0.222217	0.111116	0	0	0	0	0	0	0.333333	0.44445	0
0	0.222217	0.333333	0.333333	0.333333	0.222217	0	0.111116	0.666667	1	0.888884	0.666667	0.666667	0.777783	0.666667	0.666667	0.44445	0.111116	0.111116	0.111116	0.111116	0.111116	0.111116	0	0	0	0	0	0.333333	0.55555	0
0	0.222217	0.333333	0.222217	0.333333	0.333333	0.111116	0	0.55555	0.777783	0.333333	0.222217	0.333333	0.44445	0.666667	0.44445	0	0	0.111116	0	0	0.111116	0.111116	0	0	0	0	0.111116	0.44445	0.666667	0
0	0	0.222217	0.333333	0.222217	0.111116	0.111116	0	0.44445	0.44445	0.222217	0.222217	0.222217	0.333333	1	0.333333	0	0.333333	0.44445	0.222217	0.222217	0.333333	0.111116	0	0	0	0	0	0.333333	0.55555	0
0	0.111116	0.111116	0.44445	0.333333	0.111116	0	0	0.44445	0.44445	0.44445	0.333333	0.333333	0.55555	1	0.44445	0.111116	0.333333	0.55555	0.44445	0.55555	0.333333	0.111116	0	0	0	0	0	0.111116	0.55555	0
0	0.111116	0.111116	0.333333	0.222217	0.111116	0.111116	0	0.333333	1	0.777783	0.55555	0.55555	0.777783	1	0.55555	0.111116	0.44445	0.666667	0.888884	0.666667	0.222217	0.111116	0	0	0	0	0	0.111116	0.44445	0
0	0	0.111116	0.333333	0.111116	0.333333	0.222217	0	0.333333	1	0.777783	0.777783	0.888884	1	1	0.666667	0.222217	0.222217	0.44445	0.666667	0.44445	0.222217	0.111116	0.222217	0	0	0	0	0	0.333333	0
0	0	0.111116	0.222217	0.111116	0.222217	0.111116	0	0.111116	0.777783	0.888884	0.777783	0.666667	0.44445	1	0.888884	0.222217	0	0.222217	0.44445	0.333333	0.111116	0.111116	0	0	0	0	0	0	0.333333	0
0	0	0.111116	0.222217	0.333333	0	0.111116	0	0	0.44445	0.777783	0.55555	0.333333	0.333333	0.777783	0.44445	0	0.111116	0.111116	0.111116	0.111116	0.111116	0	0	0	0	0	0	0	0.44445	0
0	0	0.111116	0.111116	0.333333	0.111116	0	0	0	0.222217	0.666667	0.333333	0.222217	0.777783	0.888884	0.55555	0.333333	0.111116	0	0.111116	0.222217	0.111116	0	0	0	0	0	0	0.222217	0.55555	0
0	0	0.111116	0.111116	0.222217	0.111116	0	0.111116	0	0	0.44445	0.44445	0.44445	0.55555	0.44445	0.44445	0.333333	0.111116	0	0.111116	0.222217	0.222217	0	0	0	0	0	0	0.333333	0.55555	0
0	0	0.111116	0.222217	0.222217	0.222217	0.111116	0.111116	0	0	0.333333	1	0.666667	0.55555	0.44445	0.666667	0.55555	0.44445	0.111116	0.222217	0.222217	0.111116	0	0	0	0	0	0	0	0.44445	0
0	0	0.111116	0.111116	0.222217	0.222217	0.222217	0.111116	0.111116	0	0	0.666667	0.666667	0.888884	1	0.44445	0.333333	0.222217	0	0.111116	0.111116	0.111116	0.111116	0	0	0	0	0	0	0	0
0	0	0.111116	0.111116	0.222217	0.222217	0.333333	0.111116	0	0.111116	0	0.222217	0.777783	0.888884	0.888884	0.55555	0.44445	0.333333	0.333333	0.222217	0.111116	0.111116	0.111116	0.111116	0	0	0	0	0	0	0
0	0	0.111116	0.111116	0.222217	0.222217	0.222217	0.333333	0.222217	0.111116	0.111116	0	0.333333	0.888884	0.888884	1	0.888884	0.55555	0.333333	0.111116	0	0.111116	0.222217	0	0	0	0	0	0	0	0
0	0	0.111116	0.111116	0.222217	0.222217	0.222217	0.222217	0.222217	0.222217	0.111116	0.111116	0.222217	0.777783	0.777783	0.55555	0.333333	0.222217	0	0	0.111116	0.111116	0.222217	0	0	0	0	0	0	0	0
0	0	0.111116	0.111116	0.222217	0.111116	0.111116	0.111116	0	0.222217	0.111116	0.222217	0.222217	0.55555	1	0.55555	0.111116	0	0	0.111116	0.111116	0.111116	0.111116	0	0	0	0	0	0	0	0
0	0	0.111116	0.111116	0.111116	0	0.111116	0.111116	0	0.111116	0.222217	0.333333	0.222217	0.222217	0.777783	0.888884	0.44445	0.222217	0.111116	0.111116	0.111116	0.111116	0	0	0	0	0	0	0	0	0

## Sheet: (d,e) px vals Avogadro
0.44445	0.55555	0.55555	0.55555	0.55555	0.55555	0.44445	0.777783	0.888884	0.222217	0.111116	0.111116	0.111116	0	0.111116	0.111116	0.111116	0.111116	0.222217	0.333333	0.888884	0.777783	0.44445	0.44445	0.44445	0.44445	0.55555	0.44445	0.333333	0.333333	0
0.55555	0.666667	0.55555	0.55555	0.44445	0.55555	1	0.222217	0.111116	0	0	0	0	0	0	0	0	0	0	0	0.111116	0.222217	0.777783	0.777783	0.333333	0.44445	0.44445	0.55555	0.333333	0.333333	0
0.666667	0.55555	0.666667	0.44445	0.777783	0.777783	0.111116	0	0	0	0.111116	0.111116	0.111116	0.111116	0	0	0	0	0.111116	0	0	0	0.111116	0.222217	0.888884	0.44445	0.44445	0.55555	0.44445	0.44445	0
0.55555	0.666667	0.44445	0.888884	0.222217	0	0	0	0.111116	0.111116	0.111116	0.111116	0.111116	0.222217	0.111116	0	0	0.111116	0.111116	0	0	0	0	0	0.111116	0.666667	0.666667	0.44445	0.44445	0.44445	0
0.666667	0.44445	0.888884	0.222217	0	0	0	0.111116	0.111116	0.111116	0.111116	0.222217	0.111116	0.111116	0.111116	0.111116	0.111116	0.222217	0.111116	0.111116	0	0	0	0	0	0.111116	0.44445	0.666667	0.44445	0.55555	0
0.55555	0.666667	0.333333	0	0	0.111116	0.111116	0.111116	0.111116	0.222217	0.222217	0.111116	0.222217	0.222217	0.222217	0.111116	0.111116	0.333333	0.777783	0.111116	0	0	0	0	0	0	0.111116	1	0.44445	0.55555	0
0.44445	1	0.111116	0	0.111116	0.111116	0.111116	0.111116	0.222217	0.222217	1	0.333333	0.222217	0.222217	0.222217	0.222217	0.111116	0.111116	0.111116	0.111116	0	0	0	0	0	0	0	0.111116	1	0.44445	0
0.666667	0.333333	0	0.111116	0.111116	0.111116	0	0.222217	0.333333	0.222217	0.333333	0.666667	0.666667	0.666667	0.777783	0.333333	0.111116	0.111116	0.111116	0.111116	0	0	0.111116	0.222217	0.111116	0	0	0	0.44445	0.44445	0
0.777783	0.222217	0	0.111116	0.111116	0	0.111116	0.333333	0.222217	0.222217	0.44445	0.44445	0.44445	0.44445	0.44445	0.55555	0.333333	0.333333	0.333333	0.111116	0	0.222217	0.333333	0.222217	0.222217	0.111116	0	0	0.222217	0.777783	0
0.888884	0.222217	0	0.111116	0.111116	0	0.111116	0.44445	0.222217	0.222217	0.666667	0.333333	0.666667	0.777783	0.777783	0.55555	0.333333	0.222217	0.111116	0	0.111116	0.333333	0.333333	0.333333	0.333333	0.222217	0	0	0.222217	0.777783	0
1	0.111116	0	0	0	0	0.111116	0.666667	0.222217	0.333333	0.333333	0.55555	0.333333	0.222217	0.222217	0.44445	0.777783	0.55555	0.333333	0.222217	0.222217	0.333333	0.44445	0.333333	0.222217	0.111116	0	0	0.222217	0.888884	0
0.44445	0	0	0	0	0	0.111116	0.44445	0.333333	0.333333	0.333333	0.333333	0.666667	0.333333	0.222217	0.222217	0.222217	0.222217	0.222217	0.222217	0.222217	0.44445	0.333333	0.222217	0.111116	0	0	0	0.222217	0.888884	0
0.222217	0	0.111116	0	0	0	0.111116	0.44445	0.333333	0.333333	0.333333	0.333333	0.222217	0.111116	0.222217	0.222217	0.111116	0.111116	0.111116	0.222217	0.44445	0.333333	0.111116	0	0	0	0	0	0.222217	0.666667	0
0.222217	0	0.111116	0	0	0	0.111116	0.333333	0.333333	0.333333	0.333333	0.222217	0.222217	0.44445	0.222217	0.222217	0.222217	0	0.222217	0.888884	0.666667	0.111116	0	0	0	0	0	0.111116	1	0.44445	0
0.222217	0.111116	0.222217	0	0	0	0	0.333333	0.333333	0.333333	0.222217	0.222217	0.333333	0	0	0.111116	0.111116	0	0.222217	1	0.222217	0.111116	0.222217	0.111116	0	0	0	0.222217	0.777783	0.44445	0
0.333333	0.111116	0.222217	0.111116	0	0	0	0.222217	0.333333	0.333333	0.333333	0.333333	0.222217	0.111116	0.111116	0.222217	0	0.111116	0.333333	0.44445	0.222217	0.111116	0.111116	0	0	0	0.111116	1	0.333333	0.55555	0
0.44445	0.111116	0.111116	0	0	0	0	0.111116	0.333333	0.333333	0.333333	0.333333	0.333333	0.333333	0.222217	0.111116	0	0.111116	0.888884	0.333333	0.44445	0.111116	0.111116	0.111116	0.111116	0	0.111116	1	0.44445	0.55555	0
0.888884	0.111116	0.111116	0	0.111116	0	0	0	0.222217	0.333333	0.333333	0.333333	0.222217	0.222217	0.222217	0.111116	0.111116	0.333333	0.44445	0.333333	0.777783	0.111116	0.111116	0.111116	0	0	0.111116	1	0.333333	0.55555	0
0.888884	0.222217	0	0.111116	0.111116	0	0	0	0.111116	0.222217	0.333333	0.333333	0.333333	0.222217	0.222217	0.222217	0.666667	0.666667	0.333333	0.333333	0.777783	0.111116	0.111116	0.111116	0	0	0.111116	0.888884	0.44445	0.55555	0
0.666667	0.222217	0.111116	0	0	0.111116	0	0	0.111116	0.222217	0.333333	0.333333	0.333333	0.777783	0.777783	0.55555	0.666667	0.222217	0.333333	0.333333	0.44445	0.222217	0.111116	0.222217	0.111116	0	0.333333	0.666667	0.44445	0.44445	0
0.55555	0.666667	0.111116	0	0	0	0	0	0.111116	0.111116	0.222217	0.333333	0.333333	0.222217	0.333333	0.666667	0.222217	0.111116	0.777783	0.777783	0.44445	0.222217	0.111116	0.111116	0.111116	0.111116	0.888884	0.44445	0.44445	0.55555	0
0.44445	0.55555	0.111116	0.111116	0	0	0	0	0	0	0.111116	0.222217	0.333333	0.333333	0.333333	0.222217	0.222217	0.222217	0.111116	0.111116	0.333333	0.44445	0.111116	0.111116	0	0.222217	0.888884	0.44445	0.55555	0.55555	0
0.44445	0.666667	0.111116	0.111116	0	0	0	0	0	0	0	0.222217	0.333333	0.222217	0.222217	0.222217	0.666667	0.666667	0.222217	0.111116	0.111116	0.222217	0	0	0.111116	0.777783	0.44445	0.55555	0.55555	0.44445	0
0.44445	0.777783	0.222217	0	0	0	0	0	0	0	0.111116	0.222217	0.222217	0.222217	0.333333	0.666667	0.333333	0.666667	1	0.222217	0.111116	0	0	0	0.111116	1	0.333333	0.55555	0.55555	0.55555	0
0.55555	0.666667	0.333333	0	0	0	0	0	0	0	0.111116	0.222217	0.333333	0.333333	0.333333	0.111116	0.111116	0.222217	0.222217	0.222217	0.111116	0	0	0	0.111116	0.888884	0.44445	0.55555	0.44445	0.55555	0
0.44445	0.666667	0.222217	0	0	0	0	0	0	0	0	0.111116	0.222217	0.777783	0.222217	0.222217	0.222217	0.222217	0.222217	0.111116	0	0	0	0	0.222217	0.777783	0.44445	0.55555	0.55555	0.55555	0
0.44445	0.888884	0.222217	0	0	0	0	0	0	0	0	0	0	0.111116	0.222217	0.333333	0.333333	0.222217	0.111116	0.111116	0.111116	0	0	0.111116	0.777783	0.44445	0.55555	0.55555	0.55555	0.55555	0
0.44445	0.888884	0.111116	0	0	0	0	0	0	0	0	0	0	0	0	0.111116	0.222217	0.333333	0.777783	0.333333	0.222217	0	0	0.222217	1	0.44445	0.666667	0.55555	0.55555	0.55555	0
0.777783	0.222217	0	0	0	0	0	0	0	0	0	0	0	0	0	0	0.111116	0.111116	0.111116	0.111116	0.111116	0	0	0.111116	1	0.44445	0.55555	0.666667	0.666667	0.666667	0
0.888884	0.111116	0	0	0	0.111116	0.111116	0	0	0	0	0	0	0	0	0.111116	0.222217	0.111116	0.111116	0.111116	0	0	0	0.222217	0.888884	0.44445	0.55555	0.666667	0.55555	0.55555	0

## Sheet: (d,e) px vals Mitscherlich
0.333333	0.222217	0.333333	0.44445	0.222217	0.44445	0.55555	0.44445	0.44445	0.333333	0.333333	0.333333	0.55555	0.55555	0.44445	0.44445	0.333333	0.222217	0.222217	0.222217	0.222217	0.111116	0.111116	0.111116	0.111116	0.111116	0.111116	0.111116	0.111116	0.222217	0
0.333333	0.222217	0.222217	0.44445	0.333333	0.44445	0.44445	0.44445	0.44445	0.44445	0.44445	0.222217	0.111116	0.111116	0.111116	0.111116	0.222217	0.44445	0.44445	0.222217	0.222217	0.111116	0.111116	0.111116	0.111116	0.111116	0.222217	0.222217	0.222217	0.222217	0
0.333333	0.333333	0.333333	0.44445	0.333333	0.44445	0.44445	0.44445	0.44445	0.111116	0	0	0	0	0	0	0	0	0.111116	0.333333	0.222217	0.111116	0.111116	0.111116	0.111116	0.111116	0.222217	0.222217	0.111116	0.111116	0
0.333333	0.222217	0.222217	0.44445	0.333333	0.333333	0.55555	0.111116	0	0	0	0	0	0	0	0	0	0	0	0	0.222217	0.111116	0.111116	0.111116	0.111116	0.111116	0.111116	0.111116	0.111116	0.111116	0
0.222217	0.222217	0.222217	0.222217	0.222217	0.44445	0.111116	0	0	0	0	0	0	0	0	0	0	0	0	0	0	0.333333	0.111116	0.111116	0.111116	0.111116	0.111116	0.111116	0.111116	0.111116	0
0.333333	0.222217	0.333333	0.222217	0.333333	0.111116	0	0	0	0	0	0	0	0	0	0	0	0.111116	0.222217	0.111116	0	0	0.111116	0.222217	0.111116	0.222217	0.111116	0.222217	0.222217	0.222217	0
0.44445	0.333333	0.333333	0.333333	0.333333	0	0	0	0	0	0	0	0	0	0	0.111116	0.777783	0.888884	0.666667	0.55555	0.111116	0	0	0.222217	0.222217	0.222217	0.111116	0.111116	0.222217	0.222217	0
0.44445	0.333333	0.333333	0.333333	0.111116	0	0	0	0	0	0.111116	0.111116	0.777783	0.888884	0.888884	0.888884	0.888884	0.888884	0.777783	0.666667	0.222217	0.111116	0	0	0.333333	0.222217	0.111116	0.222217	0.222217	0.222217	0
0.44445	0.333333	0.222217	0.44445	0.111116	0	0	0	0.111116	0.111116	0.111116	0.55555	1	1	1	1	0.888884	0.888884	0.777783	0.666667	0.44445	0.111116	0	0	0.111116	0.222217	0.111116	0.111116	0.111116	0.222217	0
0.222217	0.333333	0.222217	0.44445	0	0	0	0	0	0	0.111116	0.666667	1	1	1	1	0.888884	0.888884	0.888884	0.666667	0.333333	0.111116	0	0	0	0.222217	0.222217	0.222217	0.111116	0.111116	0
0.44445	0.333333	0.333333	0.222217	0	0	0	0	0	0	0.222217	0.777783	1	1	1	0.888884	0.888884	0.888884	0.888884	0.666667	0.55555	0.111116	0	0	0	0.111116	0.222217	0.111116	0.111116	0.111116	0
0.333333	0.333333	0.44445	0.111116	0	0	0	0	0	0.111116	0.666667	0.888884	0.888884	1	1	1	0.888884	0.777783	0.777783	0.333333	0	0	0	0	0	0	0.222217	0.111116	0.222217	0.222217	0
0.44445	0.44445	0.44445	0.111116	0	0	0	0	0	0.222217	0.777783	0.777783	0.666667	0.333333	0.44445	0.55555	0.55555	0.55555	0.111116	0	0.111116	0.111116	0	0	0	0	0.111116	0.111116	0.111116	0.222217	0
0.44445	0.44445	0.333333	0.222217	0	0	0	0	0	0.44445	0.666667	0.44445	0.111116	0.333333	0	0	0.111116	0.666667	0	0.111116	0.111116	0	0	0	0	0	0.111116	0.111116	0.111116	0.111116	0
0.333333	0.44445	0.44445	0.111116	0	0	0	0	0.111116	0.666667	0.55555	0.55555	0.55555	0.222217	0	0.111116	0.222217	0.777783	0.111116	0.55555	0.666667	0.111116	0.111116	0	0	0	0.222217	0.111116	0.111116	0.111116	0
0.333333	0.333333	0.55555	0	0	0.111116	0	0	0.111116	0.666667	0.55555	0.44445	0.111116	0.666667	0.44445	0.44445	0.666667	0.777783	0.55555	0.55555	0.55555	0.222217	0.111116	0.111116	0	0	0.333333	0.111116	0.111116	0.111116	0
0.44445	0.333333	0.44445	0.222217	0	0.111116	0	0	0.111116	0.55555	0.55555	0.666667	0.666667	0.55555	0.55555	0.55555	0.666667	0.777783	0.666667	0.222217	0.777783	0.666667	0.55555	0	0	0.111116	0.222217	0.111116	0.222217	0.222217	0
0.44445	0.44445	0.44445	0.44445	0	0	0	0	0.111116	0.44445	0.55555	0.777783	0.777783	0.777783	0.777783	0.777783	0.777783	0.666667	0.777783	0.333333	0.666667	0.666667	0.333333	0	0	0.222217	0.222217	0.222217	0.222217	0.222217	0
0.44445	0.333333	0.44445	0.333333	0.111116	0	0	0	0	0.44445	0.55555	0.666667	0.777783	0.777783	0.888884	0.777783	0.55555	0.55555	0.777783	0.222217	0.111116	0.55555	0.111116	0	0	0.222217	0.222217	0.222217	0.222217	0.111116	0
0.44445	0.333333	0.222217	0.222217	0.44445	0.111116	0	0	0	0.222217	0.44445	0.55555	0.666667	0.666667	0.666667	0.666667	0.55555	0.111116	0.111116	0	0	0.333333	0.111116	0	0	0.222217	0.222217	0.222217	0.222217	0.222217	0
0.333333	0.333333	0.333333	0.333333	0.333333	0.333333	0	0	0	0.111116	0.333333	0.333333	0.55555	0.666667	0.666667	0.666667	0.777783	0.666667	0.55555	0.111116	0.111116	0.111116	0.111116	0	0	0.333333	0.222217	0.222217	0.222217	0.222217	0
0.222217	0.333333	0.333333	0.333333	0.44445	0.333333	0.333333	0.111116	0	0.111116	0.222217	0.222217	0.44445	0.55555	0.666667	0.666667	0.55555	0.55555	0.333333	0.111116	0	0.111116	0.111116	0	0.111116	0.44445	0.222217	0.222217	0.111116	0.222217	0
0.333333	0.222217	0.333333	0.44445	0.44445	0.333333	0.222217	0.44445	0	0	0.111116	0.222217	0.333333	0.55555	0.666667	0.55555	0.44445	0.222217	0.222217	0.222217	0.111116	0.222217	0.111116	0	0.111116	0.222217	0.222217	0.111116	0.111116	0.222217	0
0.44445	0.333333	0.333333	0.333333	0.44445	0.333333	0.333333	0.333333	0.222217	0	0	0	0.111116	0.44445	0.55555	0.55555	0.666667	0.55555	0.111116	0	0	0.111116	0	0.111116	0.222217	0.111116	0.222217	0.111116	0.111116	0.222217	0
0.333333	0.333333	0.333333	0.333333	0.44445	0.333333	0.333333	0.222217	0.111116	0	0.222217	0.55555	0.666667	0.111116	0.55555	0.55555	0.55555	0.222217	0.111116	0.111116	0.111116	0.111116	0	0.55555	0.333333	0.222217	0.222217	0.111116	0.111116	0.111116	0
0.333333	0.333333	0.333333	0.44445	0.333333	0.333333	0.222217	0.44445	0	0	0	0.888884	1	0.44445	0.222217	0.55555	0.55555	0.666667	0.777783	0.777783	0.333333	0	0.111116	0	0	0.222217	0.111116	0.111116	0.111116	0.111116	0
0.44445	0.333333	0.333333	0.333333	0.333333	0.333333	0.44445	0	0	0	0	0	0.55555	0.777783	0	0.111116	0.222217	0.55555	0.55555	0.333333	0.111116	0	0	0	0	0.111116	0.111116	0.111116	0.111116	0.111116	0
0.222217	0.222217	0.222217	0.222217	0.222217	0.333333	0.111116	0	0	0	0	0	0	0	0	0	0	0	0.111116	0	0	0	0	0	0	0	0.222217	0.111116	0.111116	0.111116	0
0.222217	0.333333	0.222217	0.222217	0.333333	0.333333	0	0	0	0	0	0.55555	0	0	0	0	0	0	0	0	0	0	0	0	0	0	0	0.333333	0.111116	0.111116	0
0.111116	0.222217	0.111116	0.111116	0.222217	0	0	0	0	0	0	0	0.111116	0	0	0	0	0	0	0	0	0.111116	0	0	0	0	0	0	0.111116	0.222217	0

## Sheet: (d,e) px vals Hopfield
0.55555	0.888884	0.888884	0.888884	0.777783	0.777783	0.777783	0.666667	0.55555	0.666667	0.55555	0.44445	0.222217	0.111116	0.111116	0.222217	0.333333	0.44445	0.44445	0.44445	0.44445	0.44445	0.333333	0.111116	0.111116	0.111116	0.111116	0.111116	0.111116	0.222217	0
0.666667	0.888884	0.888884	0.777783	0.777783	0.777783	0.666667	0.666667	0.666667	0.55555	0.44445	0.44445	0.222217	0.111116	0.222217	0.111116	0.111116	0.333333	0.44445	0.44445	0.44445	0.333333	0.333333	0.111116	0.111116	0.111116	0.111116	0.111116	0.111116	0.111116	0
0.666667	0.888884	0.777783	0.777783	0.777783	0.666667	0.666667	0.777783	0.44445	0.333333	0.44445	0.55555	0.44445	0.44445	0.44445	0.44445	0.333333	0.222217	0.44445	0.55555	0.666667	0.44445	0.222217	0.111116	0.111116	0.111116	0.111116	0.111116	0.111116	0.111116	0
0.55555	0.888884	0.777783	0.777783	0.777783	0.666667	0.777783	0.44445	0.222217	0.333333	0.44445	0.333333	0.44445	0.55555	0.55555	0.55555	0.666667	0.777783	0.44445	0.44445	0.55555	0.55555	0.333333	0.222217	0.111116	0.111116	0.111116	0.111116	0.111116	0.111116	0
0.55555	0.777783	0.777783	0.777783	0.666667	0.666667	0.55555	0.111116	0.222217	0.333333	0.333333	0.222217	0.44445	0.44445	0.44445	0.55555	0.55555	0.888884	0.55555	0.55555	0.55555	0.44445	0.44445	0.333333	0.111116	0.111116	0.111116	0.111116	0.111116	0.111116	0
0.55555	0.777783	0.666667	0.666667	0.666667	0.777783	0.44445	0.111116	0.222217	0.222217	0.111116	0.222217	0.333333	0.44445	0.44445	0.55555	0.666667	1	0.55555	0.55555	0.44445	0.333333	0.333333	0.333333	0.222217	0.111116	0.111116	0.111116	0.111116	0.111116	0
0.666667	0.666667	0.666667	0.777783	0.777783	0.888884	0.44445	0.111116	0.333333	0.222217	0.222217	0.222217	0.333333	0.44445	0.55555	0.55555	0.55555	0.888884	0.666667	0.44445	0.44445	0.333333	0.222217	0.333333	0.333333	0.111116	0.111116	0.111116	0.111116	0.111116	0
0.55555	0.666667	0.666667	0.666667	0.666667	0.777783	0.333333	0.222217	0.333333	0.333333	0.222217	0.222217	0.333333	0.44445	0.55555	0.888884	0.888884	0.777783	0.666667	0.55555	0.44445	0.44445	0.222217	0.222217	0.222217	0	0.111116	0.111116	0.111116	0.111116	0
0.55555	0.666667	0.666667	0.666667	0.55555	0.666667	0.333333	0.222217	0.333333	0.333333	0.222217	0.222217	0.333333	0.44445	0.44445	0.666667	0.888884	0.666667	0.666667	0.44445	0.44445	0.44445	0.333333	0.111116	0.222217	0.111116	0.111116	0.111116	0	0.111116	0
0.55555	0.55555	0.55555	0.55555	0.55555	0.55555	0.333333	0.222217	0.333333	0.222217	0.222217	0.222217	0.333333	0.44445	0.44445	0.666667	0.777783	0.55555	0.55555	0.44445	0.44445	0.333333	0.333333	0.111116	0.222217	0.111116	0	0.111116	0.111116	0.111116	0
0.888884	1	1	1	0.888884	0.888884	0.333333	0.222217	0.222217	0.222217	0.222217	0.333333	0.44445	0.44445	0.44445	0.777783	0.888884	0.55555	0.55555	0.55555	0.55555	0.333333	0.222217	0.111116	0.222217	0.111116	0.111116	0.111116	0	0	0
0.111116	0.111116	0.111116	0.222217	0.222217	0.222217	0.333333	0.333333	0.222217	0.111116	0.222217	0.222217	0.222217	0.222217	0.222217	0.333333	0.44445	0.44445	0.44445	0.44445	0.333333	0.333333	0.222217	0	0.111116	0	0.111116	0.111116	0.111116	0.111116	0
0	0	0	0	0	0	0	0.333333	0.222217	0.111116	0.222217	0.222217	0.111116	0.111116	0.222217	0.222217	0.333333	0.333333	0.222217	0.222217	0.111116	0.222217	0.222217	0	0	0	0.111116	0.111116	0	0.111116	0
0	0	0	0	0	0	0	0.333333	0.111116	0.111116	0.222217	0.333333	0.333333	0.333333	0.222217	0.222217	0.333333	0.333333	0.111116	0.111116	0	0.111116	0.111116	0	0	0	0.111116	0.111116	0.111116	0.111116	0
0	0	0	0	0	0	0	0.44445	0	0.222217	0.333333	0.44445	0.44445	0.44445	0.333333	0.333333	0.44445	0.333333	0.111116	0.222217	0.222217	0.111116	0.111116	0	0	0	0	0	0	0.111116	0
0	0	0	0	0	0	0	0	0.111116	0.111116	0.333333	0.44445	0.55555	0.44445	0.333333	0.333333	0.44445	0.333333	0.222217	0.333333	0.333333	0.333333	0.111116	0	0	0	0.111116	0	0	0.111116	0
0	0	0	0	0	0	0	0	0	0.222217	0.333333	0.333333	0.222217	0.222217	0.111116	0.333333	0.44445	0.333333	0.222217	0.333333	0.44445	0.333333	0	0	0.111116	0.111116	0.111116	0.111116	0.111116	0.111116	0
0	0	0	0	0	0	0	0	0	0.333333	0.333333	0.111116	0.111116	0.222217	0.222217	0.111116	0.333333	0.333333	0.111116	0.111116	0.333333	0.333333	0	0	0.111116	0.111116	0.111116	0.111116	0.111116	0.111116	0
0	0	0	0	0	0	0	0	0	0.333333	0.333333	0.222217	0.222217	0.222217	0.222217	0.333333	0.222217	0.111116	0.111116	0	0.111116	0.111116	0	0	0.111116	0.111116	0.111116	0.111116	0.111116	0.111116	0
0	0	0	0	0	0	0	0	0	0.222217	0.333333	0.222217	0	0	0.222217	0.222217	0.222217	0.222217	0.111116	0	0.111116	0.222217	0	0	0	0	0.111116	0.111116	0.111116	0.111116	0
0	0	0	0	0	0	0	0	0	0	0.333333	0.333333	0.333333	0.111116	0.111116	0.222217	0.222217	0.111116	0	0	0.222217	0.222217	0	0	0	0	0.111116	0	0.111116	0.111116	0
0	0	0	0	0	0	0	0.111116	0	0	0.111116	0.222217	0.333333	0.222217	0.111116	0.222217	0.111116	0	0.111116	0.222217	0.222217	0.111116	0.111116	0.111116	0.111116	0	0	0	0.111116	0.222217	0
0	0	0	0	0	0	0.333333	0.222217	0.111116	0.111116	0	0.222217	0.333333	0.333333	0.222217	0.222217	0.222217	0.111116	0.222217	0.222217	0.111116	0	0.222217	0.111116	0.222217	0.111116	0.111116	0	0	0	0
0	0	0	0	0	0	0.777783	0.111116	0.111116	0.222217	0	0	0.111116	0.333333	0.333333	0.333333	0.222217	0.222217	0.222217	0	0	0.111116	0.222217	0.222217	0.222217	0.222217	0.222217	0.222217	0.222217	0.111116	0
0	0	0	0	0	0	1	0.44445	0.111116	0.222217	0.111116	0	0	0.111116	0.222217	0.222217	0.222217	0.111116	0.111116	0	0	0	0.111116	0.222217	0.222217	0.222217	0.222217	0.222217	0.222217	0.222217	0
0	0	0	0	0	0.44445	0.55555	0.888884	0.333333	0.222217	0.222217	0	0	0	0	0	0	0	0.111116	0.333333	0	0	0	0	0	0	0.111116	0.222217	0.333333	0.333333	0
0	0	0	0	0	1	0.55555	0.55555	1	0.333333	0.333333	0.222217	0.111116	0.111116	0.333333	0.222217	0	0	0.111116	0.55555	0	0	0	0	0	0	0	0	0	0.222217	0
0	0	0	0	0	0.55555	1	0.55555	0.666667	1	0.333333	0.222217	0.111116	0.111116	0.222217	0.111116	0	0	0.222217	0.888884	0	0	0	0	0	0	0	0	0	0	0
0	0	0	0	0	0	1	1	0.55555	0.888884	0.777783	0.44445	0.111116	0	0.111116	0	0	0	0.44445	1	0	0	0	0	0	0	0	0	0	0	0
0	0	0	0	0	0	0.44445	1	1	0.55555	0.55555	0.666667	0.666667	0.222217	0.111116	0.111116	0.111116	0.333333	1	0.44445	0	0	0	0	0	0	0	0	0	0	0

## Sheet: (d,e) px vals Abbott
0.777783	0.777783	0.888884	0.888884	1	1	1	1	1	1	1	1	1	0.888884	0.666667	0.666667	0.888884	1	1	1	1	0.888884	0.888884	0.888884	0.888884	0.888884	0.777783	0.777783	0.777783	0.666667	0
0.666667	0.777783	0.777783	0.777783	0.777783	0.777783	0.777783	0.888884	0.888884	0.666667	0.777783	0.888884	0.44445	0.333333	0.333333	0.222217	0.222217	0.333333	0.44445	0.777783	0.777783	0.888884	0.777783	0.666667	0.666667	0.666667	0.666667	0.666667	0.666667	0.666667	0
0.666667	0.666667	0.666667	0.666667	0.666667	0.666667	0.666667	0.666667	0.333333	0.44445	0.44445	0.44445	0.333333	0.333333	0.333333	0.333333	0.333333	0.333333	0.222217	0.333333	0.333333	0.44445	0.666667	0.55555	0.55555	0.55555	0.55555	0.55555	0.55555	0.55555	0
0.55555	0.55555	0.55555	0.55555	0.55555	0.55555	0.55555	0.222217	0.222217	0.333333	0.333333	0.333333	0.333333	0.333333	0.333333	0.333333	0.333333	0.333333	0.333333	0.222217	0.222217	0.222217	0.44445	0.666667	0.55555	0.55555	0.55555	0.55555	0.55555	0.55555	0
0.55555	0.55555	0.55555	0.55555	0.55555	0.666667	0.222217	0	0.333333	0.333333	0.333333	0.333333	0.333333	0.44445	0.44445	0.44445	0.333333	0.333333	0.333333	0.333333	0.222217	0.222217	0	0.44445	0.666667	0.55555	0.55555	0.55555	0.55555	0.44445	0
0.55555	0.55555	0.55555	0.55555	0.666667	0.333333	0	0.111116	0.333333	0.333333	0.333333	0.333333	0.44445	0.44445	0.44445	0.44445	0.44445	0.333333	0.333333	0.333333	0.222217	0.222217	0	0	0.55555	0.44445	0.44445	0.44445	0.44445	0.44445	0
0.44445	0.44445	0.44445	0.55555	0.44445	0	0	0.222217	0.222217	0.333333	0.333333	0.333333	0.333333	0.44445	0.44445	0.44445	0.44445	0.44445	0.333333	0.333333	0.333333	0.222217	0.222217	0	0.222217	0.55555	0.44445	0.44445	0.44445	0.44445	0
0.44445	0.44445	0.44445	0.55555	0.111116	0	0.111116	0.333333	0.222217	0.222217	0.333333	0.333333	0.333333	0.44445	0.44445	0.44445	0.333333	0.44445	0.333333	0.333333	0.222217	0.222217	0.222217	0.111116	0	0.44445	0.44445	0.44445	0.44445	0.44445	0
0.55555	0.55555	0.55555	0.44445	0	0	0.111116	0.333333	0.222217	0.222217	0.222217	0.222217	0.333333	0.44445	0.44445	0.44445	0.44445	0.333333	0.333333	0.222217	0.222217	0.222217	0.111116	0.111116	0	0.44445	0.44445	0.44445	0.44445	0.44445	0
0.888884	0.888884	0.888884	0.888884	0.111116	0	0.111116	0.222217	0.222217	0.222217	0.222217	0.222217	0.333333	0.44445	0.44445	0.44445	0.44445	0.44445	0.333333	0.333333	0.222217	0.222217	0.111116	0.111116	0	0.55555	0.777783	0.777783	0.666667	0.666667	0
0.666667	0.55555	0.55555	0.888884	0.222217	0	0.111116	0.111116	0.222217	0.222217	0.222217	0.333333	0.333333	0.333333	0.333333	0.333333	0.333333	0.333333	0.333333	0.222217	0.222217	0.222217	0.222217	0.111116	0	0.44445	0.888884	0.777783	0.777783	0.777783	0
0.333333	0.333333	0.333333	0.44445	0.111116	0	0	0.111116	0.111116	0.222217	0.222217	0.111116	0.111116	0.111116	0.111116	0.222217	0.222217	0.222217	0.111116	0	0.111116	0.111116	0.111116	0.111116	0	0.333333	0.44445	0.44445	0.55555	0.55555	0
0.333333	0.333333	0.333333	0.44445	0.222217	0	0	0.111116	0.222217	0.111116	0.111116	0.222217	0.222217	0.111116	0	0.111116	0.222217	0	0	0	0.111116	0.111116	0	0.111116	0	0.111116	0.111116	0.111116	0.222217	0.222217	0
0.222217	0.222217	0.222217	0.222217	0.111116	0	0.111116	0.111116	0.111116	0.111116	0.111116	0	0	0	0	0	0.222217	0.111116	0	0	0	0	0	0.111116	0	0	0.111116	0.111116	0.111116	0.111116	0
0.111116	0	0.111116	0.111116	0	0	0.111116	0.111116	0.111116	0.111116	0.111116	0.111116	0.111116	0.111116	0.111116	0.111116	0.333333	0.222217	0	0.111116	0.222217	0.222217	0.222217	0.111116	0	0	0.111116	0.111116	0.111116	0.111116	0
0.111116	0.111116	0	0.111116	0.222217	0	0	0.111116	0.222217	0.222217	0.222217	0.222217	0.222217	0.333333	0.222217	0.222217	0.333333	0.333333	0.111116	0.222217	0.222217	0.222217	0.222217	0.111116	0	0.111116	0.222217	0.222217	0.222217	0.333333	0
0.222217	0.222217	0.111116	0.111116	0.222217	0	0	0.111116	0.111116	0.222217	0.222217	0.333333	0.333333	0.222217	0.111116	0.222217	0.333333	0.333333	0.111116	0.111116	0.333333	0.333333	0.222217	0.111116	0	0.111116	0.333333	0.222217	0.222217	0.222217	0
0.111116	0.111116	0.111116	0.111116	0.222217	0.222217	0.111116	0.111116	0.111116	0.222217	0.222217	0.333333	0.222217	0.111116	0.111116	0.222217	0.333333	0.333333	0.222217	0.111116	0.111116	0.222217	0.222217	0.111116	0.111116	0.111116	0.111116	0.111116	0.111116	0.111116	0
0.111116	0	0	0	0	0.222217	0.111116	0	0.111116	0.111116	0.222217	0	0	0.222217	0.111116	0	0	0	0	0	0.111116	0	0.111116	0.111116	0	0.111116	0.111116	0.111116	0.111116	0.111116	0
0	0	0	0	0	0.111116	0.111116	0	0	0	0	0	0.222217	0.222217	0.222217	0.111116	0	0	0	0.111116	0.222217	0.111116	0	0	0	0.111116	0.111116	0.111116	0.111116	0.111116	0
0	0	0	0	0	0	0	0	0	0	0.111116	0.111116	0	0.111116	0.222217	0.222217	0.111116	0.111116	0.111116	0.222217	0.111116	0.111116	0.111116	0	0.111116	0.111116	0.111116	0.111116	0.111116	0.111116	0
0	0	0	0	0	0	0	0	0	0	0.111116	0.222217	0	0	0	0	0.111116	0	0	0	0	0	0.111116	0	0.111116	0.111116	0.111116	0.111116	0.111116	0.111116	0
0	0	0	0	0	0	0	0	0	0	0.111116	0.222217	0.222217	0.222217	0.222217	0.222217	0.222217	0.111116	0.111116	0.111116	0	0.111116	0.111116	0	0.111116	0.111116	0.111116	0.111116	0.111116	0.111116	0
0.111116	0	0	0	0	0	0	0	0	0	0	0.111116	0.222217	0.222217	0.222217	0.111116	0.111116	0.111116	0.111116	0.111116	0.111116	0.111116	0	0	0.111116	0.111116	0.111116	0.111116	0.111116	0.111116	0
0	0	0	0	0	0	0	0	0	0	0	0	0.222217	0.222217	0.222217	0.222217	0.222217	0.111116	0.111116	0.111116	0.111116	0	0	0.333333	0.333333	0.333333	0.333333	0.44445	0.44445	0.44445	0
0	0	0	0	0	0	0	0	0	0	0	0	0.111116	0.222217	0.333333	0.333333	0.333333	0.333333	0.222217	0.222217	0.111116	0	0.44445	0.55555	0.55555	0.55555	0.55555	0.55555	0.55555	0.55555	0
0	0	0	0	0	0	0	0	0	0	0	0	0	0.222217	0.222217	0.333333	0.222217	0.222217	0.222217	0.111116	0	0	0.44445	0.888884	0.55555	0.666667	0.666667	0.666667	0.666667	0.666667	0
0	0	0	0	0	0	0	0	0	0	0	0	0	0	0	0	0	0	0	0	0	0	0	0.222217	1	0.777783	0.666667	0.777783	0.666667	0.777783	0
0	0	0	0	0	0	0	0	0	0	0	0	0	0	0	0	0	0	0	0	0	0	0	0	0.111116	0.666667	0.777783	0.666667	0.777783	0.777783	0
0	0	0	0	0	0	0	0	0	0	0	0	0	0	0	0	0	0	0	0	0	0	0	0	0	0.111116	1	0.666667	0.777783	0.777783	0

## Sheet: (d,e) px vals Moser
0.888884	0.777783	0.888884	0.888884	0.111116	0	0	0	0	0	0	0	0	0	0	0	0	0	0	0	0	0	0	0	0	0.111116	1	0.666667	0.777783	1	0
0.777783	1	0.666667	0.111116	0	0	0	0	0	0	0	0	0	0	0	0	0	0	0	0	0	0	0	0	0	0.111116	0.55555	0.666667	0.666667	0.888884	0
0.777783	1	0.55555	0.111116	0.111116	0	0	0	0	0	0	0	0	0	0	0	0	0	0	0	0	0	0	0	0	0	0.111116	0.888884	0.666667	0.888884	0
0.777783	1	0.55555	0.111116	0.111116	0.111116	0	0	0.111116	0.111116	0.111116	0.111116	0.111116	0.111116	0.111116	0.111116	0.111116	0.111116	0.111116	0.111116	0.111116	0	0	0	0	0	0.111116	0.55555	0.666667	0.777783	0
0.888884	0.666667	0.666667	0.111116	0.111116	0	0	0.111116	0.111116	0.333333	0.333333	0.333333	0.333333	0.333333	0.333333	0.44445	0.55555	0.44445	0.333333	0.222217	0.222217	0.111116	0	0	0	0	0	0.222217	0.55555	0.666667	0
0.888884	0.777783	0.888884	0.222217	0.111116	0	0.111116	0.111116	0.222217	0.333333	0.222217	0.222217	0.222217	0.222217	0.333333	0.333333	0.333333	0.333333	0.333333	0.333333	0.333333	0.222217	0.111116	0	0	0	0	0.111116	0.777783	0.666667	0
0.888884	0.777783	0.666667	0.55555	0.111116	0	0.111116	0.222217	0.44445	0.333333	0.333333	0.333333	0.333333	0.333333	0.333333	0.333333	0.44445	0.44445	0.44445	0.44445	0.44445	0.333333	0.111116	0	0	0	0	0.111116	1	0.55555	0
0.888884	0.888884	0.666667	0.222217	0.111116	0	0.111116	0.55555	0.44445	0.44445	0.44445	0.333333	0.333333	0.333333	0.44445	0.44445	0.44445	0.44445	0.44445	0.55555	0.55555	0.44445	0.222217	0.111116	0	0	0	0.111116	0.55555	0.666667	0
0.777783	0.777783	0.55555	0.55555	0.111116	0	0.111116	0.55555	0.44445	0.44445	0.44445	0.333333	0.333333	0.333333	0.44445	0.44445	0.55555	0.44445	0.44445	0.44445	0.44445	0.44445	0.222217	0.111116	0	0	0	0.111116	0.333333	0.666667	0
0.888884	0.666667	0.888884	0.222217	0	0	0.111116	0.55555	0.55555	0.55555	0.55555	0.55555	0.44445	0.44445	0.44445	0.44445	0.55555	0.55555	0.55555	0.55555	0.55555	0.55555	0.222217	0.111116	0	0	0	0.111116	0.111116	0.666667	0
0.888884	0.666667	1	0.111116	0	0	0.111116	0.55555	0.333333	0.222217	0.111116	0.111116	0.222217	0.44445	0.44445	0.44445	0.222217	0.111116	0.111116	0.111116	0.222217	0.333333	0.333333	0.111116	0	0	0	0	0.111116	0.333333	0
0.777783	0.777783	0.666667	0.111116	0	0.111116	0.222217	0.44445	0.333333	0.55555	0.222217	0.111116	0.111116	0.333333	0.333333	0.333333	0.111116	0.111116	0.111116	0.222217	0.55555	0.333333	0.55555	0.111116	0	0	0	0	0.111116	0.111116	0
0.666667	1	0.111116	0	0	0.111116	0.44445	0.55555	0.222217	0.111116	0.111116	0.111116	0.111116	0.222217	0.44445	0.333333	0.111116	0.222217	0.111116	0.111116	0.222217	0.44445	0.55555	0.111116	0	0	0	0	0	0.111116	0
1	0.55555	0.111116	0	0	0.111116	0.44445	0.333333	0.111116	0.111116	0.111116	0.111116	0.111116	0.222217	0.55555	0.222217	0.111116	0.111116	0.111116	0.111116	0.111116	0.222217	0.55555	0.222217	0.111116	0	0	0	0	0.111116	0
0.777783	0.222217	0.111116	0	0	0.111116	0.44445	0.333333	0.333333	0.222217	0.222217	0.222217	0.222217	0.222217	0.44445	0.44445	0.222217	0.111116	0.222217	0.222217	0.333333	0.333333	0.44445	0.222217	0.111116	0	0	0	0	0.111116	0
0.666667	0.222217	0.111116	0	0	0.111116	0.44445	0.44445	0.333333	0.222217	0.222217	0.333333	0.333333	0.44445	0.44445	0.55555	0.55555	0.333333	0.222217	0.222217	0.333333	0.55555	0.333333	0.222217	0.111116	0	0	0	0	0	0
0.666667	0.222217	0.111116	0	0	0.111116	0.333333	0.55555	0.44445	0.333333	0.333333	0.333333	0.333333	0.44445	0.44445	0.55555	0.333333	0.44445	0.44445	0.44445	0.44445	0.55555	0.44445	0.222217	0.111116	0	0	0	0	0	0
0.666667	0.222217	0.111116	0	0	0.111116	0.333333	0.44445	0.333333	0.222217	0.222217	0.111116	0.222217	0.44445	0.44445	0.55555	0.222217	0.111116	0.222217	0.333333	0.333333	0.333333	0.333333	0.222217	0	0	0	0	0	0	0
0.777783	0.333333	0.111116	0	0	0.111116	0.333333	0.222217	0.222217	0.222217	0.111116	0.111116	0.222217	0.55555	0.44445	0.44445	0.333333	0.111116	0.111116	0.222217	0.222217	0.222217	0.333333	0.111116	0	0	0	0	0	0	0
0.666667	0.55555	0.222217	0.111116	0	0	0.111116	0.333333	0.111116	0.111116	0.111116	0.222217	0.111116	0.222217	0.222217	0.222217	0.222217	0.222217	0.222217	0.111116	0.111116	0.111116	0.222217	0.111116	0	0	0	0	0	0	0
0.666667	0.666667	0.55555	0.111116	0	0	0.111116	0.44445	0.222217	0.222217	0.111116	0.111116	0.222217	0.111116	0.111116	0.222217	0.222217	0.111116	0.111116	0.111116	0.222217	0.222217	0.222217	0	0	0	0	0	0	0	0
0.888884	0.666667	0.777783	0.222217	0	0	0	0.222217	0.222217	0.222217	0.222217	0.111116	0.222217	0.333333	0.222217	0.222217	0.222217	0.111116	0.111116	0.333333	0.222217	0.222217	0.111116	0	0	0	0	0	0	0	0
0.777783	0.666667	0.777783	0.55555	0.111116	0	0	0.111116	0.333333	0.222217	0.333333	0.222217	0.222217	0.222217	0.222217	0.222217	0.222217	0.222217	0.222217	0.222217	0.222217	0.222217	0.111116	0	0	0	0	0	0	0	0
0.777783	0.777783	0.666667	0.666667	0.111116	0.111116	0	0	0.222217	0.333333	0.333333	0.333333	0.333333	0.222217	0.222217	0.222217	0.333333	0.333333	0.333333	0.222217	0.333333	0.111116	0	0	0	0	0	0	0.111116	0	0
0.888884	0.777783	0.666667	1	0.222217	0.111116	0.111116	0	0.111116	0.44445	0.333333	0.44445	0.333333	0.333333	0.333333	0.44445	0.333333	0.44445	0.44445	0.333333	0.111116	0	0	0	0	0	0	0	0.111116	0	0
0.888884	0.777783	0.666667	0.888884	0.55555	0.111116	0.111116	0	0.111116	0.333333	0.222217	0.333333	0.44445	0.333333	0.44445	0.55555	0.55555	0.44445	0.222217	0.111116	0.111116	0	0	0	0	0	0	0	0.111116	0	0
0.777783	0.777783	0.777783	0.666667	1	0.44445	0.111116	0.111116	0.111116	0.222217	0.222217	0.222217	0.111116	0.222217	0.222217	0.111116	0.111116	0.111116	0.111116	0.111116	0.111116	0	0	0	0	0	0	0	0	0.111116	0
0.777783	0.777783	0.666667	0.666667	0.666667	1	0.44445	0.222217	0.222217	0.222217	0.222217	0.222217	0.111116	0.111116	0.111116	0.111116	0.111116	0.111116	0.111116	0.222217	0.111116	0	0	0	0	0	0	0	0	0.111116	0
0.777783	0.666667	1	1	1	0.666667	0.55555	0.222217	0.333333	0.333333	0.222217	0.222217	0.333333	0.333333	0.222217	0.333333	0.333333	0.222217	0.111116	0.222217	0.111116	0	0	0	0	0	0	0	0	0.111116	0
0.666667	0.888884	0.55555	0.111116	0.111116	0.55555	0.333333	0.333333	0.44445	0.333333	0.333333	0.222217	0.222217	0.222217	0.222217	0.222217	0.222217	0.111116	0.222217	0.111116	0	0	0	0	0	0	0	0	0	0.111116	0

## Sheet: (d,e) px vals Horse
0	0	0	0	0	0.111116	0.222217	0.333333	0.222217	0.222217	0.333333	0.222217	0.333333	0.333333	0.222217	0.333333	0.333333	0.333333	0.333333	0.333333	0.44445	0.333333	0.333333	0.333333	0.333333	0.333333	0.44445	0.44445	0.333333	0.44445	0
0	0	0	0	0.111116	0.111116	0.111116	0.222217	0.222217	0.222217	0.222217	0.222217	0.333333	0.333333	0.222217	0.333333	0.333333	0.333333	0.333333	0.333333	0.44445	0.55555	0.666667	0.333333	0.333333	0.44445	0.333333	0.44445	0.333333	0.333333	0
0	0.111116	0	0.111116	0.111116	0.111116	0.111116	0.111116	0.111116	0.222217	0.222217	0.222217	0.333333	0.333333	0.222217	0.222217	0.333333	0.333333	0.666667	1	0.333333	0.666667	0.777783	0.44445	0.333333	0.44445	0.333333	0.333333	0.222217	0.333333	0
0	0	0	0.111116	0.111116	0.111116	0.111116	0.111116	0.111116	0.222217	0.111116	0.222217	0.222217	0.333333	0.222217	0.333333	0.333333	0.55555	0.888884	0.777783	0.55555	0.777783	0.888884	0.44445	0.333333	0.44445	0.333333	0.222217	0.222217	0.333333	0
0	0	0	0	0.111116	0.111116	0.111116	0.111116	0.111116	0.111116	0.222217	0.111116	0.222217	0.333333	0.111116	0.222217	0.44445	0.666667	0.55555	0.666667	0.55555	0.44445	0.888884	0.888884	0.333333	0.222217	0.222217	0.111116	0.111116	0.222217	0
0	0	0	0	0	0	0.111116	0.111116	0.222217	0.111116	0.222217	0.111116	0.333333	0.333333	0.333333	0.55555	0.666667	0.44445	0.44445	0.666667	0.55555	0.44445	0.55555	0.777783	0.222217	0.111116	0.222217	0.111116	0	0.111116	0
0	0	0	0	0	0.111116	0.222217	0	0.222217	0.111116	0.111116	0.222217	0.222217	0.111116	0.111116	0.55555	0.777783	0.44445	0.666667	0.44445	0.44445	0.777783	0.666667	0.777783	0.55555	0.222217	0	0.111116	0	0	0
0	0	0	0	0.111116	0	0	0	0.222217	0.111116	0.111116	0.111116	0.111116	0.222217	0.666667	0.777783	0.44445	0.333333	0.777783	0.44445	0.333333	0.333333	0.55555	0.55555	0.222217	0.222217	0.111116	0	0	0	0
0.111116	0.111116	0	0	0	0.111116	0.55555	0.333333	0	0	0.111116	0.111116	0.222217	0.44445	0.777783	0.888884	0.55555	0.55555	0.777783	0.44445	0.333333	0.333333	0.333333	0.333333	0	0.333333	0.222217	0	0	0	0
0	0.111116	0	0	0.333333	0.666667	0.666667	0.888884	0.55555	0	0	0	0	0.44445	0.777783	0.55555	0.44445	0.777783	0.777783	0.55555	0.44445	0.44445	0.333333	0.222217	0.111116	0.111116	0	0	0	0	0
0	0	0	0	0.44445	0.55555	0.333333	0.333333	1	0.888884	1	1	1	0.888884	0.55555	0.44445	0.666667	0.888884	0.777783	0.44445	0.44445	0.44445	0	0	0	0	0	0	0	0	0
0	0	0	0.111116	0.55555	0.333333	0.111116	0.55555	1	1	1	1	1	1	0.888884	0.888884	0.777783	0.666667	0.666667	0.44445	0.44445	0.44445	0	0	0	0	0	0	0	0	0
0	0	0	0.222217	0.333333	0	0.222217	1	0.888884	0.55555	0.888884	1	1	1	0.777783	0.666667	0.777783	0.666667	0.666667	0.55555	0.44445	0.666667	0	0	0.111116	0	0	0	0	0	0
0	0	0	0.111116	0.333333	0	0.44445	0.888884	0.55555	0.55555	0.888884	0.777783	0.888884	0.888884	0.777783	0.666667	0.55555	0.777783	0.888884	0.55555	0.44445	0.777783	0.222217	0	0	0	0	0	0	0	0
0	0	0	0.333333	0.222217	0	0.55555	0.55555	0.55555	0.888884	0.666667	0.666667	0.777783	0.777783	0.666667	0.44445	0.55555	0.666667	0.666667	0.55555	0.44445	0.666667	0.333333	0	0	0	0	0	0	0	0
0	0	0.333333	0.777783	0.222217	0	0.44445	0.55555	0.44445	0.888884	0.777783	0.666667	0.666667	0.666667	0.55555	0.55555	0.55555	0.55555	0.55555	0.44445	0.44445	0.666667	0.44445	0	0	0	0	0	0	0	0
0	0	0.333333	0.333333	0	0	0.222217	0.55555	0.333333	0.55555	0.55555	0.666667	0.55555	0.55555	0.44445	0.55555	0.55555	0.44445	0.55555	0.44445	0.666667	0.666667	0.44445	0	0	0	0	0	0	0	0
0	0	0	0.222217	0	0	0.222217	0.44445	0.333333	0.222217	0.333333	0.333333	0.44445	0.55555	0.44445	0.55555	0.44445	0.44445	0.333333	0.44445	0.333333	0.333333	0.333333	0	0.111116	0.111116	0.111116	0	0.111116	0	0
0.111116	0.111116	0	0.111116	0.222217	0.222217	0.111116	0.44445	0.222217	0	0.333333	0.111116	0.222217	0.333333	0.44445	0.333333	0.55555	0.666667	0.111116	0.111116	0.222217	0.55555	0.44445	0	0.111116	0.111116	0.111116	0.111116	0.111116	0.111116	0
0.111116	0.111116	0.111116	0.111116	0	0	0	0.333333	0.44445	0.111116	0.44445	0.111116	0	0	0	0	0.333333	0.777783	0.44445	0	0.333333	0.777783	0.44445	0.111116	0.111116	0.111116	0.111116	0.111116	0.111116	0.222217	0
0.111116	0.111116	0.111116	0.111116	0.111116	0.111116	0.111116	0.222217	0.333333	0.222217	0.111116	0.111116	0.222217	0.222217	0.222217	0.111116	0.111116	0.44445	0.666667	0	0.222217	0.666667	0.44445	0.111116	0.222217	0.222217	0.222217	0	0	0	0
0.111116	0	0	0	0.111116	0.222217	0.222217	0.222217	0.222217	0.111116	0	0.222217	0	0	0.111116	0.111116	0.111116	0.222217	0.666667	0.44445	0.222217	0.55555	0.333333	0	0.111116	0.111116	0.111116	0.111116	0.111116	0	0
0.111116	0.111116	0.111116	0	0.111116	0.222217	0.222217	0.222217	0.333333	0.222217	0.111116	0.111116	0.222217	0.111116	0.222217	0.111116	0.222217	0.111116	0.333333	0.666667	0.333333	0.55555	0.333333	0.111116	0.222217	0.111116	0.111116	0	0.222217	0.111116	0
0.111116	0.222217	0.222217	0.222217	0.222217	0.222217	0.222217	0.222217	0.333333	0.333333	0.111116	0.222217	0.111116	0.222217	0.333333	0.222217	0.111116	0.222217	0	0.111116	0.222217	0.44445	0.44445	0	0	0	0.111116	0.111116	0	0	0
0	0	0.111116	0.111116	0	0	0	0	0	0.333333	0	0	0	0.111116	0.111116	0.111116	0.111116	0	0.111116	0	0.111116	0.333333	0.44445	0	0	0	0	0.111116	0	0	0
0.111116	0.111116	0.111116	0	0.111116	0.111116	0.222217	0	0	0.333333	0.111116	0	0.111116	0	0	0	0.111116	0.111116	0.222217	0.222217	0	0.333333	0.44445	0.111116	0.222217	0.111116	0.111116	0.111116	0.111116	0	0
0.111116	0.111116	0	0	0.111116	0	0	0.111116	0	0.111116	0.333333	0	0	0	0	0	0	0	0.111116	0	0	0.222217	0.44445	0	0.111116	0.111116	0.111116	0.111116	0.111116	0.111116	0
0.111116	0.111116	0.222217	0.222217	0.222217	0	0	0	0.222217	0.222217	0.44445	0.222217	0.111116	0.111116	0.222217	0.222217	0.222217	0.111116	0	0	0.222217	0.222217	0.333333	0.333333	0.222217	0.222217	0.222217	0.111116	0	0.111116	0
0	0.111116	0.111116	0.222217	0.222217	0	0	0	0	0	0	0.222217	0.222217	0.111116	0.222217	0	0.111116	0.222217	0	0	0.333333	0.222217	0.222217	0.44445	0.222217	0.222217	0.222217	0.222217	0.222217	0.222217	0
0.111116	0	0.222217	0.111116	0.111116	0	0	0	0	0	0	0	0	0	0.222217	0.222217	0.222217	0.222217	0.111116	0	0	0.111116	0.111116	0	0.111116	0	0	0.111116	0	0	0

## Sheet: (d,e) px vals Anchovy
0	0	0	0	0	0	0	0	0	0	0	0	0	0	0	0	0	0	0	0	0	0	0	0	0	0	0	0	0	0	0
0	0	0	0	0	0	0	0	0	0	0	0	0	0	0	0	0	0	0	0	0	0	0	0	0	0	0	0	0	0	0
0	0	0	0	0	0	0	0	0	0	0	0	0	0	0	0	0	0	0	0	0	0	0	0	0	0	0	0	0	0	0
0	0	0	0	0	0	0	0	0	0	0	0	0	0	0	0	0	0	0	0	0	0	0	0	0	0	0	0	0	0.111116	0
0	0	0	0	0	0	0	0	0	0	0	0	0.111116	0	0	0	0	0	0	0	0	0	0	0.111116	0.111116	0.111116	0.111116	0.111116	0.111116	0.111116	0
0	0	0	0	0	0	0	0	0	0	0	0.111116	0.111116	0.111116	0	0	0	0	0	0	0.111116	0.111116	0.111116	0.111116	0.111116	0.111116	0.111116	0.222217	0.222217	0.111116	0
0	0	0	0	0	0	0	0	0	0	0	0.111116	0.111116	0.111116	0.111116	0.111116	0.111116	0.111116	0.111116	0.111116	0.111116	0.111116	0.222217	0.222217	0.111116	0.111116	0.222217	0.222217	0.222217	0.222217	0
0	0	0	0	0	0	0	0	0	0	0.111116	0.111116	0.222217	0.111116	0.111116	0.111116	0.111116	0.111116	0.111116	0.111116	0.111116	0.111116	0.222217	0.222217	0.222217	0.222217	0.222217	0.222217	0.222217	0.222217	0
0	0	0	0	0	0	0	0	0	0.111116	0.111116	0.111116	0.222217	0.222217	0.222217	0.222217	0.222217	0.111116	0.111116	0.111116	0.111116	0.111116	0.222217	0.222217	0.222217	0.222217	0.222217	0.222217	0.222217	0.333333	0
0	0	0	0	0.111116	0.111116	0.111116	0.111116	0.111116	0.111116	0.111116	0.222217	0.222217	0.222217	0.222217	0.222217	0.222217	0.111116	0.111116	0.111116	0.222217	0.222217	0.111116	0.222217	0.222217	0.222217	0.222217	0.222217	0.222217	0.333333	0
0	0	0.111116	0.111116	0.111116	0.111116	0.111116	0.111116	0.111116	0.111116	0.111116	0.222217	0.222217	0.222217	0.222217	0.222217	0.222217	0.111116	0.111116	0.111116	0.44445	0.44445	0.222217	0.222217	0.222217	0.222217	0.222217	0.222217	0.222217	0.333333	0
0	0.111116	0.111116	0.111116	0.111116	0.111116	0.111116	0.111116	0.111116	0.222217	0.222217	0.222217	0.222217	0.222217	0.222217	0.222217	0.222217	0.222217	0.111116	0.111116	0.666667	0.55555	0.44445	0.222217	0.222217	0.222217	0.222217	0.222217	0.333333	0.333333	0
0	0.111116	0.111116	0.111116	0.111116	0.111116	0.111116	0.111116	0.111116	0.111116	0	0	0	0	0	0	0	0	0	0.222217	1	1	0.666667	0.333333	0.111116	0.111116	0.111116	0.222217	0.222217	0.333333	0
0	0.111116	0.111116	0.111116	0.111116	0	0.111116	0.333333	0.333333	0.44445	0.55555	0.666667	0.666667	0.777783	0.777783	0.777783	0.777783	0.777783	0.777783	0.777783	1	1	1	0.777783	0.666667	0.55555	0.55555	0.55555	0.44445	0.44445	0
0.111116	0.111116	0.111116	0	0.333333	0.55555	0.55555	0	0	0.44445	0.777783	0.777783	0.888884	0.888884	0.888884	0.888884	0.888884	0.888884	0.888884	0.888884	0.888884	0.888884	1	1	1	1	1	1	1	1	0
0.111116	0.111116	0.111116	0.55555	0.55555	0.44445	0.55555	0	0.55555	0.44445	0.55555	0.55555	0.666667	0.55555	0.55555	0.55555	0.666667	0.55555	0.55555	0.55555	0.666667	0.777783	0.777783	0.777783	0.777783	0.666667	0.666667	0.666667	0.666667	0.666667	0
0.111116	0.111116	0.222217	0.777783	0.333333	0	0.333333	0.888884	0.888884	0.666667	0.666667	0.888884	0.888884	0.888884	0.888884	0.777783	0.777783	0.777783	0.777783	0.55555	0.55555	0.666667	0.666667	0.777783	0.666667	0.666667	0.55555	0.44445	0.333333	0.333333	0
0.111116	0.111116	0.111116	0.333333	0.55555	0.111116	0.666667	1	0.55555	0.44445	0	0.333333	0.55555	0.55555	0.55555	0.666667	0.666667	0.666667	0.666667	0.666667	0.666667	0.666667	0.666667	0.666667	0.777783	0.666667	0.666667	0.666667	0.777783	0.777783	0
0.111116	0.111116	0.111116	0.111116	0.111116	0.55555	0.55555	0.44445	0.44445	0.55555	0	0	0.44445	0.44445	0.44445	0.44445	0.44445	0.44445	0.44445	0.55555	0.55555	0.55555	0.55555	0.666667	0.666667	0.777783	0.888884	0.888884	0.888884	0.666667	0
0.111116	0.111116	0.111116	0.222217	0.222217	0.111116	0.111116	0.333333	0.333333	0.333333	0.44445	0.44445	0.44445	0.55555	0.55555	0.55555	0.55555	0.55555	0.55555	0.55555	0.55555	0.55555	0.55555	0.666667	0.888884	1	0.777783	0.666667	0.55555	0.333333	0
0.111116	0.111116	0.222217	0.222217	0.222217	0.333333	0.333333	0.333333	0.222217	0.222217	0.55555	0.55555	0.44445	0.333333	0.333333	0.44445	0.44445	0.666667	0.55555	0.44445	0.333333	0.333333	0.333333	0.44445	0.777783	0.777783	0.44445	0.333333	0.44445	0.44445	0
0.111116	0.111116	0.222217	0.222217	0.222217	0.222217	0.333333	0.333333	0.333333	0.333333	0.55555	0.55555	0.55555	0.222217	0.333333	0.222217	0.55555	0.777783	0.55555	0.333333	0.333333	0.44445	0.44445	0.333333	0.333333	0.44445	0.44445	0.44445	0.44445	0.44445	0
0.111116	0.111116	0.111116	0.222217	0.222217	0.222217	0.222217	0.333333	0.222217	0.333333	0.44445	0.44445	0.222217	0.333333	0.333333	0.333333	0.44445	0.44445	0.44445	0.333333	0.44445	0.44445	0.44445	0.44445	0.44445	0.44445	0.44445	0.44445	0.44445	0.44445	0
0.111116	0.111116	0.111116	0.111116	0.222217	0.222217	0.222217	0.222217	0.222217	0.222217	0.333333	0.333333	0.333333	0.333333	0.333333	0.333333	0.333333	0.333333	0.333333	0.333333	0.44445	0.44445	0.44445	0.44445	0.44445	0.44445	0.44445	0.44445	0.44445	0.44445	0
0.111116	0.111116	0.111116	0.111116	0.111116	0.111116	0.111116	0.111116	0.222217	0.222217	0.222217	0.222217	0.333333	0.333333	0.333333	0.333333	0.333333	0.333333	0.333333	0.333333	0.333333	0.333333	0.44445	0.44445	0.44445	0.44445	0.44445	0.44445	0.44445	0.44445	0
0	0.111116	0.111116	0.111116	0.111116	0.111116	0.111116	0.111116	0.111116	0.222217	0.222217	0.222217	0.222217	0.222217	0.333333	0.333333	0.333333	0.333333	0.333333	0.333333	0.333333	0.333333	0.333333	0.333333	0.333333	0.333333	0.333333	0.333333	0.44445	0.333333	0
0	0	0	0.111116	0.111116	0	0.111116	0.111116	0.111116	0.111116	0.111116	0.111116	0.222217	0.222217	0.222217	0.222217	0.222217	0.333333	0.333333	0.333333	0.333333	0.333333	0.333333	0.333333	0.333333	0.333333	0.333333	0.333333	0.333333	0.333333	0
0	0	0	0	0	0	0	0	0	0	0.111116	0.111116	0.111116	0.111116	0.111116	0.222217	0.222217	0.222217	0.222217	0.222217	0.222217	0.333333	0.333333	0.333333	0.333333	0.333333	0.333333	0.333333	0.222217	0.222217	0
0	0	0	0	0	0	0	0	0	0	0	0.111116	0.111116	0.111116	0.111116	0.111116	0.222217	0.222217	0.222217	0.222217	0.222217	0.222217	0.222217	0.222217	0.222217	0.222217	0.222217	0.222217	0.222217	0.222217	0
0	0	0	0	0	0	0	0	0	0	0	0	0	0	0.111116	0.111116	0.111116	0.111116	0.111116	0.111116	0.111116	0.111116	0.111116	0.111116	0.111116	0.111116	0.111116	0.111116	0.111116	0.111116	0

## Sheet: (d,e) px vals Mockingbird
0.222217	0.222217	0.222217	0.222217	0.222217	0.222217	0.111116	0	0	0.222217	0.333333	0.333333	0.333333	0.333333	0.222217	0.111116	0.111116	0	0	0	0	0	0	0	0	0	0	0	0	0	0
0.222217	0.222217	0.222217	0.222217	0.222217	0.222217	0.111116	0	0	0.111116	0.222217	0.333333	0.333333	0.333333	0.222217	0.111116	0.111116	0.111116	0.111116	0.111116	0	0	0	0	0	0	0	0	0	0	0
0.222217	0.222217	0.222217	0.222217	0.222217	0.222217	0.111116	0.111116	0	0.111116	0.222217	0.333333	0.333333	0.333333	0.222217	0.111116	0.111116	0.111116	0.111116	0.111116	0.111116	0.111116	0	0	0	0	0	0	0	0	0
0.333333	0.333333	0.333333	0.333333	0.222217	0.222217	0.222217	0.111116	0	0	0.222217	0.222217	0.333333	0.333333	0.222217	0.111116	0.111116	0.111116	0.111116	0.111116	0.111116	0.111116	0.111116	0	0	0	0	0	0	0	0
0.333333	0.222217	0.111116	0.222217	0.333333	0.333333	0.111116	0.111116	0.111116	0.111116	0.222217	0.222217	0.333333	0.222217	0.111116	0	0	0	0	0.111116	0.111116	0.111116	0.111116	0	0	0	0	0	0	0	0
0.222217	0.222217	0.111116	0.111116	0.222217	0.333333	0.222217	0.111116	0.111116	0.111116	0.222217	0.222217	0.333333	0.222217	0.111116	0	0	0	0	0.111116	0.111116	0.111116	0.111116	0.111116	0	0	0	0	0	0	0
0.222217	0.222217	0.222217	0.222217	0.222217	0.222217	0.222217	0.222217	0.111116	0.111116	0.222217	0.333333	0.333333	0.222217	0.222217	0	0	0	0	0.111116	0.111116	0.111116	0.111116	0.111116	0	0	0	0	0.111116	0.111116	0
0.222217	0.111116	0.111116	0.111116	0.111116	0.333333	0.222217	0.222217	0.222217	0.111116	0.222217	0.333333	0.333333	0.222217	0.222217	0	0	0	0	0.111116	0.111116	0.111116	0.222217	0	0	0	0	0.111116	0.111116	0.111116	0
0.222217	0.222217	0.111116	0.111116	0.111116	0.111116	0.222217	0.333333	0.111116	0.222217	0.222217	0.222217	0.333333	0.222217	0.222217	0.111116	0	0	0	0.111116	0.111116	0.111116	0.111116	0.333333	0.333333	0.333333	0.222217	0.111116	0.111116	0.111116	0
0.222217	0.222217	0.222217	0.111116	0.111116	0.111116	0	0.222217	0.333333	0.111116	0.222217	0.333333	0.333333	0.333333	0.222217	0.111116	0.111116	0	0	0.111116	0.111116	0.111116	0.44445	0.55555	0.333333	0.44445	0.333333	0.222217	0.111116	0.111116	0
0.222217	0.222217	0.222217	0.222217	0.111116	0.111116	0.111116	0	0.111116	0.333333	0.222217	0.111116	0.333333	0.222217	0.222217	0.111116	0.111116	0	0	0	0.111116	0.44445	0.55555	0.55555	0.44445	0.44445	0.333333	0	0.111116	0.111116	0
0.333333	0.333333	0.222217	0.222217	0.111116	0.111116	0.111116	0.111116	0	0.111116	0.333333	0.333333	0.333333	0.333333	0.222217	0.111116	0	0	0.333333	0.333333	0.44445	0.55555	0.55555	0.55555	0.55555	0.44445	0.111116	0.111116	0.111116	0.111116	0
0.333333	0.333333	0.222217	0.222217	0.222217	0.111116	0.111116	0	0	0	0	0.55555	0.55555	0.44445	0.44445	0.333333	0.333333	0.44445	0.44445	0.44445	0.44445	0.44445	0.44445	0.44445	0.55555	0.333333	0	0.111116	0.111116	0.111116	0
0.333333	0.333333	0.333333	0.222217	0.222217	0.111116	0.111116	0	0	0	0	0.333333	0.55555	0.44445	0.44445	0.333333	0.44445	0.44445	0.333333	0.44445	0.333333	0.333333	0.44445	0.44445	0.44445	0.222217	0	0	0.111116	0.111116	0
0.333333	0.333333	0.222217	0.222217	0.222217	0.111116	0	0	0	0	0	0	0.333333	0.55555	0.333333	0.222217	0	0.111116	0.333333	0.111116	0	0.333333	0.44445	0.44445	0.333333	0	0	0	0	0.111116	0
0.222217	0.222217	0.222217	0.222217	0.222217	0.111116	0	0	0	0	0	0	0.44445	0.44445	0.333333	0.333333	0.333333	0.333333	0	0.111116	0.333333	0.333333	0.333333	0.44445	0.222217	0	0	0	0	0	0
0.222217	0.222217	0.222217	0.222217	0.222217	0.111116	0	0	0	0	0	0	0.222217	0.111116	0.111116	0.333333	0.44445	0.55555	0.44445	0.44445	0.44445	0.44445	0.333333	0.222217	0	0	0	0	0	0	0
0.222217	0.222217	0.222217	0.222217	0.111116	0.111116	0	0	0	0	0	0.222217	0.111116	0.111116	0.333333	0.44445	0.666667	0.666667	0.55555	0.55555	0.44445	0.333333	0.222217	0	0	0	0	0	0	0	0
0.222217	0.222217	0.111116	0.111116	0.111116	0	0	0	0	0	0	0	0.111116	0.111116	0	0.333333	0.888884	0.55555	0.44445	0.333333	0.111116	0	0	0	0	0	0	0	0	0	0
0.222217	0.222217	0.111116	0.111116	0.111116	0	0	0	0	0	0	0	0.111116	0.111116	0.111116	0.111116	0.44445	0.888884	0.333333	0	0	0	0	0	0	0	0	0	0	0	0
0.333333	0.111116	0.111116	0.111116	0	0	0	0	0	0	0	0	0	0.111116	0.111116	0	0.44445	0.44445	0.333333	0.111116	0	0	0.111116	0	0	0	0	0	0	0	0
0.222217	0.111116	0.111116	0	0	0	0	0	0	0	0	0	0.111116	0.111116	0	0	0.111116	0.333333	0	0.222217	0.111116	0.111116	0.111116	0.111116	0	0	0	0	0	0	0
0.222217	0	0	0	0	0	0	0	0	0	0	0	0	0	0	0	0	0.333333	0.333333	0.333333	0.333333	0.111116	0.111116	0	0	0	0	0	0	0	0
0.222217	0	0.111116	0.111116	0	0.111116	0.222217	0.222217	0.333333	0.333333	0.333333	0.44445	0.44445	0.44445	0.55555	0.55555	0.777783	0.777783	0.55555	0.44445	0.44445	0.333333	0.44445	0.333333	0.333333	0.333333	0.333333	0.222217	0.111116	0.111116	0
0.222217	0.111116	0.111116	0.111116	0.333333	0.55555	0.666667	0.888884	1	1	1	1	1	1	1	1	1	0.888884	0.666667	0.55555	0.44445	0.44445	0.44445	0.666667	1	1	1	0.888884	0.666667	0.55555	0
0.222217	0.111116	0.222217	0.111116	0.44445	1	0.777783	0.888884	0.888884	0.888884	0.888884	0.666667	0.55555	0.666667	0.888884	0.888884	0.888884	0.888884	1	0.888884	0.777783	0.777783	0.666667	0.888884	0.666667	0.777783	0.777783	0.777783	0.777783	0.777783	0
0.222217	0.222217	0.222217	0.111116	0.44445	0.888884	0.666667	0.666667	0.777783	0.777783	0.777783	0.777783	0.777783	0.777783	0.777783	0.777783	0.777783	0.666667	0.666667	0.666667	0.666667	0.55555	0.55555	0.666667	0.666667	0.666667	0.55555	0.55555	0.55555	0.55555	0
0.222217	0.111116	0.111116	0	0.44445	1	0.666667	0.777783	0.777783	0.888884	0.777783	0.777783	0.777783	0.777783	0.777783	0.777783	0.666667	0.666667	0.55555	0.55555	0.55555	0.55555	0.55555	0.55555	0.55555	0.55555	0.55555	0.55555	0.55555	0.666667	0
0.222217	0.111116	0.111116	0	0.44445	0.666667	0.666667	0.666667	0.666667	0.666667	0.666667	0.666667	0.666667	0.888884	0.888884	0.888884	0.777783	0.666667	0.666667	0.666667	0.666667	0.55555	0.55555	0.55555	0.55555	0.55555	0.666667	0.55555	0.55555	0.666667	0
0.111116	0.111116	0.111116	0	0.44445	0.666667	0.55555	0.55555	0.55555	0.55555	0.44445	0.44445	0.44445	0.44445	0.44445	0.44445	0.44445	0.44445	0.44445	0.44445	0.44445	0.44445	0.44445	0.44445	0.44445	0.44445	0.44445	0.44445	0.55555	0.55555	0

[truncated: 27 more sheets: (d,e) px vals Hazelnuts, (d,e) px vals Apples, (d,e) px vals Magnolia, (d,e) px vals Harom, (d,e) px vals Aon, (d,e) px vals Mbili, (d,e) px vals LetterH, (d,e) px vals LetterA, (d,e) px vals LetterM, (d,e) px vals NoisyApple1, (d,e) px vals NoisyApple2, (d,e) px vals NoisyApple3, (d,e) px vals NoisyHorse1, (d,e) px vals NoisyHorse2, (d,e) px vals NoisyHorse3, (d,e) px vals ObscMagn1, (d,e) px vals ObscMagn2, (d,e) px vals ObscMagn3, (d,e) px vals ObscHazeln1, (d,e) px vals ObscHazeln2 …]
