# Supplementary material for: Pattern recognition in the nucleation kinetics of non-equilibrium self-assembly
Source: Nature. 2024 Jan 17;625(7995):500–7. doi: 10.1038/s41586-023-06890-z (PMC10794147; doi:10.1038/s41586-023-06890-z)
Supplement: Supplementary file 6 — Source Data Fig. 6 [file 41586_2023_6890_MOESM6_ESM.xlsx]

## Sheet: (b) tile concs (nM)
tile name	Hodgkin	Avogadro	Mitscherlich	Hopfield	Abbott	Moser	Horse	Anchovy	Mockingbird	Hazelnuts	Apples	Magnolia	Harom	Aon	Mbili	LetterH	LetterA	LetterM	NoisyApple1	NoisyApple2	NoisyApple3	NoisyHorse1	NoisyHorse2	NoisyHorse3	ObscMagn1	ObscMagn2	ObscMagn3	ObscHazeln1	ObscHazeln2	ObscHazeln3	VarHarom1	VarHarom2	VarHarom3	VarHarom4	VarHarom5	VarHarom6
H0	104.002	312.007	150	34.6675	24.0379	72.1137	104.002	216.341	72.1137	50	34.6675	72.1137	312.007	16.6667	24.0379	150	312.013	150	34.6675	24.0379	34.6675	104.002	104.002	104.002	72.1137	312.007	72.1137	50	34.6675	50	150	16.6667	72.1137	216.341	216.341	450
S1	34.6675	24.0379	16.6667	34.6675	34.6675	24.0379	24.0379	16.6667	16.6667	216.341	312.007	24.0379	16.6667	24.0379	34.6675	104.002	16.6667	34.6675	24.0379	34.6675	50	24.0379	24.0379	16.6667	24.0379	24.0379	24.0379	16.6667	216.341	216.341	34.6675	34.6675	34.6675	24.0379	34.6675	24.0379
N2	16.6667	450	34.6675	24.0379	24.0379	16.6667	16.6667	150	16.6667	24.0379	24.0379	34.6675	24.0379	16.6667	24.0379	16.6667	34.6681	24.0379	24.0379	16.6667	24.0379	50	24.0379	16.6667	34.6675	16.6667	34.6675	24.0379	16.6667	24.0379	50	50	16.6667	16.6667	50	16.6667
S3	72.1137	16.6667	34.6675	24.0379	216.341	24.0379	16.6667	34.6675	34.6675	34.6675	150	24.0379	24.0379	34.6675	16.6667	16.6667	16.6667	16.6667	150	150	150	16.6667	24.0379	16.6667	34.6675	24.0379	24.0379	50	34.6675	34.6675	16.6667	16.6667	24.0379	24.0379	16.6667	16.6667
H4	72.1137	34.6675	16.6667	50	50	50	34.6675	24.0379	50	312.007	34.6675	24.0379	16.6667	150	150	34.6675	50	150	34.6675	34.6675	34.6675	34.6675	34.6675	24.0379	34.6675	24.0379	24.0379	150	312.007	312.007	72.1137	104.002	216.341	312.007	16.6667	72.1137
N5	34.6675	216.341	24.0379	24.0379	150	16.6667	50	16.6667	16.6667	104.002	150	24.0379	24.0379	16.6667	24.0379	24.0379	24.0375	16.6667	150	150	72.1137	16.6667	50	24.0379	50	24.0379	24.0379	50	104.002	104.002	34.6675	16.6667	16.6667	34.6675	34.6675	34.6675
H6	24.0379	34.6675	24.0379	16.6667	24.0379	50	16.6667	50	104.002	24.0379	16.6667	50	24.0379	34.6675	50	450	16.6667	16.6667	16.6667	16.6667	34.6675	16.6667	450	312.007	50	50	50	24.0379	24.0379	16.6667	16.6667	72.1137	216.341	24.0379	50	24.0379
H7	24.0379	150	24.0379	16.6667	16.6667	24.0379	72.1137	450	50	216.341	24.0379	150	72.1137	16.6667	34.6675	104.002	216.337	150	34.6675	24.0379	24.0379	72.1137	72.1137	72.1137	150	72.1137	150	216.341	216.341	216.341	150	72.1137	72.1137	24.0379	72.1137	72.1137
H8	24.0379	34.6675	24.0379	34.6675	24.0379	34.6675	150	50	16.6667	24.0379	24.0379	50	16.6667	150	104.002	72.1137	50	72.1137	24.0379	24.0379	24.0379	150	312.007	24.0379	50	50	24.0379	24.0379	24.0379	24.0379	72.1137	150	150	216.341	24.0379	150
S9	16.6667	34.6675	34.6675	72.1137	450	16.6667	50	16.6667	16.6667	50	216.341	24.0379	24.0379	16.6667	34.6675	24.0379	16.6667	16.6667	216.341	216.341	216.341	34.6675	50	24.0379	16.6667	24.0379	24.0379	34.6675	50	50	50	34.6675	16.6667	34.6675	50	34.6675
N10	16.6667	34.6675	16.6667	16.6667	104.002	16.6667	34.6675	50	150	34.6675	16.6667	16.6667	16.6667	50	34.6675	34.6675	16.6667	72.1137	16.6667	16.6667	16.6667	34.6675	34.6675	34.6675	16.6667	16.6667	24.0379	34.6675	34.6675	16.6667	16.6667	16.6667	34.6675	24.0379	24.0379	16.6667
S11	16.6667	16.6667	34.6675	24.0379	16.6667	34.6675	50	34.6675	50	16.6667	34.6675	16.6667	150	16.6667	104.002	72.1137	34.6681	24.0379	34.6675	24.0379	34.6675	50	50	34.6675	16.6667	16.6667	34.6675	16.6667	16.6667	34.6675	150	72.1137	50	104.002	216.341	150
H12	16.6667	16.6667	16.6667	104.002	16.6667	50	16.6667	16.6667	150	104.002	24.0379	24.0379	34.6675	16.6667	16.6667	34.6675	24.0375	16.6667	24.0379	24.0379	24.0379	16.6667	24.0379	16.6667	24.0379	24.0379	50	104.002	104.002	16.6667	24.0379	16.6667	16.6667	24.0379	16.6667	16.6667
S13	16.6667	16.6667	16.6667	16.6667	24.0379	24.0379	16.6667	50	72.1137	104.002	16.6667	216.341	50	34.6675	16.6667	16.6667	104.004	50	16.6667	16.6667	16.6667	16.6667	16.6667	16.6667	216.341	50	216.341	104.002	50	104.002	72.1137	50	34.6675	24.0379	50	24.0379
H14	34.6675	34.6675	104.002	50	34.6675	50	72.1137	150	50	72.1137	50	150	216.341	72.1137	16.6667	150	72.1125	150	50	50	16.6667	72.1137	72.1137	72.1137	150	450	150	72.1137	150	72.1137	72.1137	50	312.007	104.002	104.002	16.6667
S15	24.0379	150	34.6675	312.007	216.341	450	16.6667	16.6667	34.6675	104.002	34.6675	16.6667	34.6675	16.6667	34.6675	16.6667	16.6667	24.0379	34.6675	34.6675	104.002	16.6667	34.6675	16.6667	24.0379	16.6667	16.6667	24.0379	104.002	104.002	16.6667	16.6667	50	16.6667	34.6675	34.6675
S16	16.6667	16.6667	72.1137	50	50	16.6667	50	16.6667	24.0379	50	216.341	16.6667	16.6667	24.0379	34.6675	24.0379	24.0375	24.0379	216.341	216.341	216.341	50	104.002	50	34.6675	16.6667	16.6667	24.0379	50	50	16.6667	24.0379	16.6667	50	16.6667	34.6675
B17	104.002	24.0379	16.6667	50	24.0379	24.0379	104.002	16.6667	34.6675	24.0379	24.0379	150	24.0379	16.6667	450	104.002	24.0375	150	24.0379	24.0379	24.0379	104.002	104.002	50	72.1137	150	150	450	24.0379	24.0379	16.6667	16.6667	104.002	16.6667	16.6667	34.6675
N18	34.6675	34.6675	34.6675	216.341	104.002	24.0379	16.6667	16.6667	34.6675	34.6675	24.0379	16.6667	16.6667	16.6667	24.0379	34.6675	16.6667	50	24.0379	450	24.0379	16.6667	16.6667	16.6667	24.0379	16.6667	16.6667	216.341	34.6675	34.6675	24.0379	16.6667	16.6667	24.0379	16.6667	34.6675
H19	24.0379	34.6675	50	34.6675	24.0379	24.0379	216.341	104.002	16.6667	24.0379	24.0379	104.002	50	24.0379	72.1137	150	50	72.1137	24.0379	24.0379	24.0379	312.007	216.341	16.6667	104.002	34.6675	104.002	24.0379	16.6667	24.0379	72.1137	104.002	150	450	50	150
S20	16.6667	16.6667	16.6667	16.6667	16.6667	24.0379	16.6667	450	50	34.6675	50	450	34.6675	24.0379	34.6675	34.6675	72.1125	34.6675	50	34.6675	50	16.6667	16.6667	16.6667	450	150	450	34.6675	16.6667	34.6675	34.6675	16.6667	16.6667	34.6675	50	24.0379
N21	16.6667	450	72.1137	312.007	150	312.007	16.6667	16.6667	34.6675	150	24.0379	34.6675	16.6667	24.0379	16.6667	16.6667	16.6667	16.6667	24.0379	24.0379	24.0379	16.6667	16.6667	16.6667	34.6675	34.6675	34.6675	150	104.002	150	24.0379	24.0379	50	16.6667	24.0379	16.6667
N22	50	16.6667	34.6675	16.6667	216.341	16.6667	16.6667	34.6675	50	34.6675	216.341	24.0379	24.0379	16.6667	24.0379	24.0379	34.6681	16.6667	24.0379	104.002	216.341	16.6667	16.6667	16.6667	16.6667	24.0379	24.0379	104.002	34.6675	34.6675	50	16.6667	24.0379	16.6667	24.0379	24.0379
H23	150	34.6675	72.1137	50	16.6667	24.0379	216.341	150	50	16.6667	50	312.007	24.0379	72.1137	24.0379	34.6675	216.337	16.6667	50	24.0379	24.0379	216.341	216.341	216.341	312.007	450	312.007	16.6667	16.6667	16.6667	16.6667	16.6667	72.1137	104.002	50	104.002
S24	50	16.6667	24.0379	24.0379	72.1137	16.6667	16.6667	34.6675	24.0379	16.6667	72.1137	50	24.0379	34.6675	16.6667	16.6667	34.6681	24.0379	72.1137	72.1137	24.0379	16.6667	16.6667	16.6667	50	50	50	16.6667	16.6667	16.6667	16.6667	34.6675	34.6675	50	50	34.6675
B25	16.6667	34.6675	72.1137	16.6667	34.6675	450	16.6667	16.6667	50	50	16.6667	50	24.0379	50	24.0379	24.0379	16.6667	16.6667	34.6675	16.6667	16.6667	104.002	104.002	16.6667	50	34.6675	50	50	16.6667	50	16.6667	24.0379	24.0379	16.6667	34.6675	50
N26	16.6667	450	16.6667	16.6667	24.0379	16.6667	34.6675	34.6675	104.002	16.6667	16.6667	16.6667	34.6675	34.6675	24.0379	24.0379	24.0375	24.0379	16.6667	16.6667	24.0379	34.6675	34.6675	34.6675	16.6667	16.6667	16.6667	16.6667	16.6667	16.6667	24.0379	16.6667	16.6667	16.6667	24.0379	50
H27	216.341	34.6675	450	16.6667	24.0379	72.1137	24.0379	34.6675	104.002	16.6667	24.0379	50	72.1137	34.6675	34.6675	24.0379	34.6681	16.6667	24.0379	16.6667	24.0379	24.0379	50	24.0379	50	50	24.0379	16.6667	16.6667	150	72.1137	312.007	24.0379	150	104.002	16.6667
B28	16.6667	312.007	24.0379	16.6667	16.6667	150	24.0379	16.6667	24.0379	16.6667	16.6667	24.0379	34.6675	24.0379	34.6675	16.6667	34.6681	16.6667	34.6675	50	16.6667	24.0379	24.0379	50	24.0379	24.0379	16.6667	16.6667	16.6667	34.6675	24.0379	16.6667	16.6667	16.6667	24.0379	16.6667
H29	216.341	50	150	34.6675	16.6667	24.0379	24.0379	16.6667	16.6667	216.341	50	104.002	72.1137	34.6675	150	150	50	24.0379	50	50	34.6675	24.0379	24.0379	24.0379	104.002	104.002	104.002	216.341	50	216.341	24.0379	72.1137	16.6667	24.0379	34.6675	34.6675
S30	34.6675	16.6667	16.6667	24.0379	16.6667	50	34.6675	24.0379	150	24.0379	24.0379	24.0379	34.6675	16.6667	34.6675	24.0379	16.6667	16.6667	24.0379	24.0379	24.0379	16.6667	34.6675	24.0379	24.0379	24.0379	16.6667	24.0379	24.0379	16.6667	16.6667	50	16.6667	16.6667	50	50
H31	24.0379	34.6675	24.0379	24.0379	16.6667	34.6675	150	312.007	50	50	72.1137	104.002	72.1137	24.0379	72.1137	150	216.337	150	72.1137	72.1137	72.1137	150	72.1137	34.6675	104.002	104.002	104.002	50	16.6667	50	150	150	216.341	104.002	312.007	72.1137
B32	50	24.0379	150	72.1137	50	72.1137	150	104.002	72.1137	24.0379	50	104.002	216.341	34.6675	104.002	34.6675	104.004	34.6675	50	50	50	34.6675	16.6667	150	104.002	34.6675	104.002	24.0379	150	24.0379	50	72.1137	216.341	216.341	50	216.341
S33	24.0379	16.6667	16.6667	16.6667	16.6667	16.6667	50	50	216.341	34.6675	16.6667	16.6667	16.6667	72.1137	16.6667	50	34.6681	34.6675	16.6667	16.6667	16.6667	50	50	50	16.6667	16.6667	34.6675	34.6675	34.6675	104.002	34.6675	50	24.0379	16.6667	16.6667	16.6667
B34	34.6675	16.6667	16.6667	150	16.6667	34.6675	34.6675	16.6667	216.341	150	34.6675	16.6667	50	24.0379	16.6667	50	16.6667	16.6667	34.6675	34.6675	34.6675	34.6675	34.6675	50	16.6667	16.6667	24.0379	150	150	16.6667	50	16.6667	34.6675	72.1137	72.1137	24.0379
S35	34.6675	16.6667	34.6675	24.0379	72.1137	16.6667	24.0379	24.0379	16.6667	104.002	34.6675	24.0379	24.0379	16.6667	16.6667	16.6667	34.6681	16.6667	34.6675	34.6675	34.6675	24.0379	34.6675	24.0379	16.6667	24.0379	24.0379	216.341	104.002	104.002	16.6667	34.6675	24.0379	24.0379	16.6667	50
H36	72.1137	16.6667	24.0379	34.6675	72.1137	24.0379	24.0379	24.0379	34.6675	24.0379	24.0379	34.6675	16.6667	16.6667	34.6675	34.6675	16.6667	50	24.0379	16.6667	24.0379	24.0379	24.0379	24.0379	34.6675	50	34.6675	24.0379	72.1137	24.0379	34.6675	16.6667	16.6667	16.6667	34.6675	24.0379
S37	34.6675	16.6667	24.0379	150	16.6667	34.6675	16.6667	16.6667	72.1137	16.6667	24.0379	24.0379	50	16.6667	34.6675	16.6667	16.6667	16.6667	24.0379	24.0379	16.6667	16.6667	16.6667	34.6675	24.0379	24.0379	24.0379	16.6667	16.6667	24.0379	24.0379	16.6667	34.6675	16.6667	16.6667	24.0379
B38	34.6675	34.6675	104.002	16.6667	16.6667	24.0379	50	24.0379	34.6675	24.0379	16.6667	72.1137	24.0379	16.6667	24.0379	16.6667	34.6681	34.6675	16.6667	16.6667	16.6667	34.6675	50	16.6667	72.1137	312.007	72.1137	24.0379	104.002	24.0379	34.6675	50	24.0379	24.0379	50	34.6675
S39	50	72.1137	24.0379	24.0379	104.002	104.002	34.6675	16.6667	16.6667	72.1137	150	16.6667	24.0379	24.0379	24.0379	16.6667	16.6667	16.6667	150	150	150	34.6675	34.6675	34.6675	72.1137	16.6667	16.6667	34.6675	72.1137	72.1137	16.6667	16.6667	24.0379	16.6667	16.6667	16.6667
H40	150	50	150	34.6675	34.6675	34.6675	450	34.6675	50	24.0379	104.002	150	34.6675	150	16.6667	34.6675	104.004	34.6675	34.6675	104.002	312.007	450	450	72.1137	150	104.002	150	24.0379	312.007	24.0379	16.6667	16.6667	34.6675	24.0379	34.6675	16.6667
S41	24.0379	24.0379	24.0379	216.341	50	16.6667	16.6667	16.6667	50	34.6675	24.0379	24.0379	16.6667	24.0379	50	50	24.0375	104.002	72.1137	24.0379	24.0379	16.6667	16.6667	16.6667	104.002	24.0379	24.0379	16.6667	34.6675	34.6675	16.6667	16.6667	16.6667	16.6667	50	24.0379
H42	16.6667	24.0379	16.6667	34.6675	16.6667	104.002	16.6667	150	72.1137	216.341	16.6667	216.341	72.1137	50	16.6667	50	104.004	50	16.6667	16.6667	50	24.0379	16.6667	16.6667	216.341	312.007	216.341	216.341	216.341	216.341	104.002	50	16.6667	72.1137	24.0379	34.6675
S43	16.6667	16.6667	16.6667	16.6667	16.6667	50	50	50	16.6667	34.6675	72.1137	24.0379	50	24.0379	50	216.341	104.004	34.6675	72.1137	72.1137	72.1137	50	34.6675	34.6675	24.0379	104.002	24.0379	34.6675	50	34.6675	16.6667	24.0379	24.0379	16.6667	104.002	50
H44	50	16.6667	24.0379	34.6675	150	16.6667	72.1137	16.6667	16.6667	50	150	34.6675	34.6675	24.0379	24.0379	16.6667	16.6667	16.6667	150	150	150	72.1137	72.1137	72.1137	24.0379	34.6675	34.6675	16.6667	50	50	16.6667	24.0379	34.6675	16.6667	34.6675	24.0379
S45	104.002	104.002	34.6675	34.6675	24.0379	16.6667	16.6667	72.1137	16.6667	16.6667	16.6667	50	16.6667	50	34.6675	16.6667	24.0375	16.6667	16.6667	16.6667	16.6667	16.6667	16.6667	16.6667	50	50	34.6675	16.6667	16.6667	16.6667	16.6667	24.0379	50	16.6667	24.0379	24.0379
N46	16.6667	24.0379	24.0379	24.0379	72.1137	16.6667	16.6667	34.6675	72.1137	24.0379	50	50	50	34.6675	16.6667	16.6667	34.6681	24.0379	50	50	72.1137	16.6667	16.6667	16.6667	50	150	50	24.0379	16.6667	24.0379	16.6667	24.0379	16.6667	16.6667	16.6667	34.6675
S47	24.0379	16.6667	34.6675	24.0379	34.6675	16.6667	50	16.6667	24.0379	72.1137	312.007	24.0379	16.6667	16.6667	24.0379	16.6667	16.6667	24.0379	24.0379	312.007	312.007	50	50	50	50	24.0379	24.0379	16.6667	72.1137	72.1137	24.0379	34.6675	24.0379	16.6667	16.6667	72.1137
S48	16.6667	24.0379	24.0379	16.6667	16.6667	24.0379	16.6667	50	150	24.0379	16.6667	16.6667	34.6675	72.1137	34.6675	16.6667	34.6681	24.0379	16.6667	16.6667	16.6667	16.6667	50	72.1137	16.6667	16.6667	16.6667	24.0379	24.0379	16.6667	16.6667	24.0379	34.6675	16.6667	50	50
B49	24.0379	104.002	72.1137	216.341	450	16.6667	24.0379	16.6667	34.6675	24.0379	312.007	24.0379	16.6667	24.0379	24.0379	34.6675	16.6667	24.0379	312.007	104.002	34.6675	72.1137	34.6675	34.6675	24.0379	24.0379	24.0379	16.6667	24.0379	24.0379	34.6675	34.6675	16.6667	16.6667	34.6675	16.6667
S50	16.6667	312.007	16.6667	16.6667	16.6667	16.6667	24.0379	24.0379	72.1137	16.6667	16.6667	16.6667	34.6675	16.6667	24.0379	16.6667	16.6667	24.0379	16.6667	150	16.6667	24.0379	24.0379	24.0379	16.6667	16.6667	24.0379	16.6667	16.6667	34.6675	24.0379	16.6667	16.6667	16.6667	16.6667	16.6667
H51	50	24.0379	16.6667	72.1137	72.1137	50	50	16.6667	34.6675	216.341	16.6667	24.0379	16.6667	150	104.002	16.6667	34.6681	50	16.6667	16.6667	72.1137	50	150	50	34.6675	24.0379	24.0379	34.6675	216.341	216.341	34.6675	34.6675	72.1137	104.002	50	450
S52	50	16.6667	34.6675	16.6667	34.6675	16.6667	24.0379	24.0379	34.6675	24.0379	24.0379	72.1137	16.6667	34.6675	34.6675	34.6675	16.6667	50	24.0379	24.0379	24.0379	24.0379	24.0379	16.6667	72.1137	72.1137	72.1137	24.0379	16.6667	24.0379	34.6675	16.6667	16.6667	24.0379	24.0379	34.6675
H53	216.341	50	104.002	50	34.6675	24.0379	50	16.6667	16.6667	50	72.1137	312.007	50	16.6667	72.1137	150	50	24.0379	72.1137	72.1137	72.1137	50	50	50	312.007	50	312.007	50	24.0379	50	24.0379	50	24.0379	24.0379	16.6667	24.0379
S54	24.0379	16.6667	24.0379	24.0379	16.6667	24.0379	16.6667	34.6675	450	16.6667	34.6675	16.6667	104.002	24.0379	50	72.1137	34.6681	24.0379	34.6675	34.6675	34.6675	16.6667	16.6667	16.6667	16.6667	16.6667	16.6667	16.6667	16.6667	16.6667	104.002	72.1137	34.6675	216.341	450	104.002
H55	50	24.0379	16.6667	72.1137	50	50	34.6675	24.0379	50	450	16.6667	16.6667	50	104.002	72.1137	34.6675	16.6667	50	16.6667	34.6675	16.6667	34.6675	34.6675	34.6675	24.0379	16.6667	16.6667	16.6667	450	450	50	34.6675	24.0379	16.6667	24.0379	312.007
S56	24.0379	72.1137	50	24.0379	50	216.341	16.6667	16.6667	50	104.002	24.0379	34.6675	16.6667	24.0379	16.6667	24.0379	24.0375	16.6667	34.6675	24.0379	50	16.6667	16.6667	50	34.6675	72.1137	34.6675	104.002	34.6675	104.002	24.0379	16.6667	16.6667	24.0379	16.6667	16.6667
H57	34.6675	16.6667	24.0379	50	72.1137	16.6667	312.007	24.0379	16.6667	50	216.341	34.6675	50	16.6667	16.6667	16.6667	34.6681	16.6667	216.341	16.6667	34.6675	312.007	312.007	24.0379	24.0379	34.6675	34.6675	72.1137	50	50	50	24.0379	50	34.6675	24.0379	34.6675
S58	72.1137	16.6667	24.0379	24.0379	216.341	16.6667	16.6667	34.6675	16.6667	34.6675	104.002	16.6667	34.6675	50	34.6675	16.6667	16.6667	16.6667	104.002	104.002	72.1137	16.6667	16.6667	16.6667	16.6667	24.0379	16.6667	34.6675	16.6667	34.6675	16.6667	16.6667	16.6667	16.6667	34.6675	24.0379
H59	24.0379	16.6667	24.0379	104.002	34.6675	16.6667	24.0379	16.6667	24.0379	312.007	72.1137	34.6675	34.6675	50	34.6675	72.1137	24.0375	72.1137	72.1137	16.6667	72.1137	24.0379	50	72.1137	150	34.6675	34.6675	16.6667	312.007	312.007	16.6667	24.0379	34.6675	50	16.6667	16.6667
B60	24.0379	16.6667	16.6667	34.6675	16.6667	34.6675	34.6675	24.0379	216.341	34.6675	24.0379	16.6667	50	16.6667	16.6667	24.0379	24.0375	16.6667	24.0379	24.0379	24.0379	16.6667	16.6667	34.6675	16.6667	16.6667	16.6667	34.6675	34.6675	24.0379	50	24.0379	16.6667	72.1137	72.1137	16.6667
B61	16.6667	150	24.0379	16.6667	216.341	24.0379	34.6675	34.6675	150	34.6675	16.6667	34.6675	16.6667	34.6675	24.0379	16.6667	24.0375	16.6667	24.0379	16.6667	16.6667	50	34.6675	34.6675	34.6675	34.6675	16.6667	34.6675	34.6675	16.6667	16.6667	24.0379	16.6667	16.6667	50	16.6667
N62	50	16.6667	24.0379	16.6667	72.1137	16.6667	34.6675	24.0379	34.6675	24.0379	24.0379	24.0379	24.0379	16.6667	34.6675	34.6675	34.6681	50	104.002	24.0379	16.6667	34.6675	34.6675	34.6675	24.0379	104.002	24.0379	24.0379	50	24.0379	24.0379	16.6667	50	50	24.0379	50
H63	16.6667	24.0379	34.6675	72.1137	50	34.6675	104.002	312.007	16.6667	104.002	34.6675	104.002	150	150	150	16.6667	216.337	150	34.6675	16.6667	34.6675	104.002	104.002	104.002	104.002	24.0379	104.002	104.002	312.007	104.002	450	150	216.341	312.007	150	312.007
H64	216.341	72.1137	50	50	16.6667	34.6675	312.007	216.341	72.1137	16.6667	50	72.1137	50	34.6675	50	24.0379	216.337	34.6675	50	16.6667	50	312.007	312.007	34.6675	72.1137	104.002	72.1137	16.6667	24.0379	16.6667	50	16.6667	216.341	104.002	216.341	150
S65	16.6667	34.6675	50	16.6667	16.6667	50	24.0379	24.0379	34.6675	24.0379	16.6667	16.6667	16.6667	34.6675	16.6667	34.6675	16.6667	34.6675	16.6667	16.6667	34.6675	24.0379	34.6675	24.0379	16.6667	150	16.6667	24.0379	104.002	24.0379	34.6675	24.0379	34.6675	24.0379	24.0379	16.6667
H66	34.6675	72.1137	104.002	50	34.6675	34.6675	72.1137	104.002	24.0379	104.002	50	72.1137	150	72.1137	34.6675	216.341	104.004	150	50	450	50	72.1137	72.1137	72.1137	72.1137	216.341	72.1137	104.002	24.0379	104.002	104.002	34.6675	312.007	150	312.007	104.002
S67	24.0379	34.6675	24.0379	34.6675	16.6667	16.6667	16.6667	34.6675	50	34.6675	72.1137	16.6667	450	16.6667	24.0379	34.6675	34.6681	24.0379	72.1137	34.6675	24.0379	16.6667	72.1137	16.6667	34.6675	16.6667	16.6667	34.6675	34.6675	34.6675	104.002	72.1137	16.6667	34.6675	34.6675	16.6667
H68	150	24.0379	16.6667	50	50	50	24.0379	16.6667	24.0379	450	72.1137	34.6675	34.6675	24.0379	50	104.002	16.6667	16.6667	72.1137	72.1137	16.6667	24.0379	16.6667	24.0379	50	34.6675	34.6675	50	450	450	34.6675	50	16.6667	50	24.0379	104.002
S69	16.6667	104.002	16.6667	16.6667	216.341	16.6667	34.6675	34.6675	150	16.6667	16.6667	24.0379	16.6667	50	24.0379	16.6667	16.6667	24.0379	104.002	16.6667	16.6667	34.6675	34.6675	34.6675	24.0379	24.0379	34.6675	16.6667	16.6667	150	16.6667	24.0379	24.0379	24.0379	16.6667	16.6667
H70	34.6675	50	72.1137	72.1137	34.6675	50	150	104.002	16.6667	34.6675	50	104.002	72.1137	24.0379	24.0379	50	104.004	24.0379	50	50	104.002	16.6667	16.6667	150	104.002	24.0379	104.002	34.6675	34.6675	34.6675	24.0379	16.6667	72.1137	450	16.6667	312.007
B71	16.6667	24.0379	72.1137	34.6675	150	16.6667	50	16.6667	24.0379	72.1137	216.341	24.0379	16.6667	16.6667	16.6667	24.0379	16.6667	16.6667	216.341	216.341	16.6667	50	50	16.6667	72.1137	24.0379	24.0379	312.007	72.1137	72.1137	24.0379	16.6667	34.6675	34.6675	24.0379	16.6667
H72	312.007	50	150	34.6675	24.0379	24.0379	312.007	104.002	16.6667	16.6667	72.1137	312.007	16.6667	50	16.6667	34.6675	216.337	34.6675	16.6667	72.1137	72.1137	312.007	24.0379	16.6667	312.007	72.1137	312.007	16.6667	150	16.6667	16.6667	24.0379	16.6667	150	24.0379	34.6675
S73	16.6667	24.0379	16.6667	104.002	50	50	104.002	16.6667	16.6667	16.6667	34.6675	16.6667	50	16.6667	104.002	50	16.6667	24.0379	34.6675	34.6675	34.6675	104.002	104.002	104.002	72.1137	16.6667	16.6667	24.0379	16.6667	16.6667	104.002	16.6667	16.6667	104.002	104.002	16.6667
H74	16.6667	34.6675	16.6667	16.6667	34.6675	16.6667	50	50	104.002	24.0379	16.6667	16.6667	16.6667	34.6675	24.0379	16.6667	24.0375	34.6675	24.0379	16.6667	16.6667	50	24.0379	50	16.6667	16.6667	50	24.0379	24.0379	50	16.6667	16.6667	24.0379	24.0379	24.0379	16.6667
N75	16.6667	16.6667	16.6667	16.6667	16.6667	16.6667	24.0379	24.0379	104.002	16.6667	24.0379	216.341	16.6667	16.6667	24.0379	34.6675	72.1125	24.0379	24.0379	24.0379	150	24.0379	150	24.0379	216.341	104.002	216.341	16.6667	16.6667	16.6667	24.0379	16.6667	16.6667	34.6675	16.6667	16.6667
H76	150	150	312.007	34.6675	24.0379	24.0379	450	34.6675	50	24.0379	72.1137	104.002	72.1137	34.6675	16.6667	24.0379	312.013	24.0379	72.1137	16.6667	150	450	72.1137	450	104.002	104.002	104.002	24.0379	16.6667	24.0379	16.6667	50	16.6667	16.6667	34.6675	34.6675
S77	24.0379	24.0379	24.0379	150	24.0379	24.0379	24.0379	16.6667	24.0379	24.0379	34.6675	24.0379	34.6675	34.6675	50	16.6667	24.0375	312.007	34.6675	16.6667	50	24.0379	24.0379	24.0379	16.6667	24.0379	24.0379	34.6675	24.0379	24.0379	24.0379	50	16.6667	50	50	34.6675
H78	34.6675	50	24.0379	24.0379	16.6667	34.6675	72.1137	104.002	50	34.6675	24.0379	72.1137	216.341	104.002	72.1137	216.341	72.1125	50	24.0379	24.0379	72.1137	72.1137	72.1137	24.0379	72.1137	216.341	72.1137	34.6675	150	34.6675	104.002	216.341	24.0379	72.1137	150	104.002
B79	34.6675	16.6667	150	72.1137	50	104.002	104.002	24.0379	24.0379	16.6667	50	104.002	150	34.6675	104.002	216.341	450	16.6667	50	34.6675	50	104.002	104.002	16.6667	16.6667	104.002	104.002	24.0379	16.6667	16.6667	16.6667	104.002	72.1137	216.341	450	104.002
S80	34.6675	16.6667	50	16.6667	16.6667	24.0379	34.6675	34.6675	24.0379	16.6667	34.6675	24.0379	50	24.0379	24.0379	104.002	50	72.1137	34.6675	34.6675	72.1137	34.6675	34.6675	34.6675	24.0379	24.0379	16.6667	16.6667	16.6667	16.6667	104.002	34.6675	24.0379	150	72.1137	24.0379
H81	50	34.6675	16.6667	72.1137	72.1137	34.6675	50	24.0379	34.6675	450	16.6667	34.6675	50	312.007	150	16.6667	34.6681	72.1137	16.6667	16.6667	16.6667	24.0379	50	24.0379	24.0379	34.6675	34.6675	50	450	450	72.1137	72.1137	150	216.341	34.6675	150
S82	72.1137	104.002	34.6675	24.0379	24.0379	16.6667	16.6667	72.1137	16.6667	16.6667	16.6667	34.6675	34.6675	34.6675	16.6667	16.6667	24.0375	16.6667	16.6667	16.6667	16.6667	16.6667	16.6667	16.6667	34.6675	34.6675	16.6667	16.6667	16.6667	24.0379	16.6667	16.6667	16.6667	24.0379	34.6675	16.6667
H83	72.1137	24.0379	24.0379	16.6667	16.6667	34.6675	34.6675	34.6675	16.6667	72.1137	50	24.0379	24.0379	24.0379	216.341	50	34.6681	16.6667	104.002	16.6667	50	34.6675	34.6675	34.6675	24.0379	24.0379	50	72.1137	72.1137	16.6667	72.1137	24.0379	72.1137	24.0379	312.007	34.6675
N84	50	104.002	24.0379	24.0379	24.0379	16.6667	24.0379	150	16.6667	24.0379	24.0379	34.6675	34.6675	16.6667	24.0379	16.6667	16.6667	16.6667	24.0379	72.1137	24.0379	24.0379	24.0379	24.0379	34.6675	216.341	34.6675	24.0379	216.341	24.0379	50	34.6675	24.0379	16.6667	24.0379	34.6675
N85	24.0379	16.6667	16.6667	16.6667	104.002	16.6667	24.0379	50	312.007	72.1137	16.6667	16.6667	34.6675	16.6667	24.0379	16.6667	16.6667	72.1137	16.6667	16.6667	16.6667	24.0379	16.6667	16.6667	16.6667	16.6667	16.6667	72.1137	72.1137	72.1137	24.0379	24.0379	50	16.6667	24.0379	16.6667
S86	34.6675	24.0379	16.6667	16.6667	34.6675	16.6667	16.6667	104.002	24.0379	34.6675	16.6667	50	50	16.6667	16.6667	50	50	312.007	16.6667	24.0379	104.002	16.6667	72.1137	16.6667	50	34.6675	50	34.6675	312.007	34.6675	16.6667	24.0379	24.0379	24.0379	16.6667	16.6667
B87	16.6667	34.6675	50	16.6667	24.0379	216.341	16.6667	24.0379	50	34.6675	16.6667	24.0379	24.0379	16.6667	16.6667	24.0379	16.6667	16.6667	16.6667	16.6667	16.6667	16.6667	16.6667	16.6667	24.0379	24.0379	24.0379	34.6675	216.341	34.6675	16.6667	24.0379	34.6675	24.0379	16.6667	24.0379
S88	312.007	50	34.6675	16.6667	34.6675	24.0379	16.6667	34.6675	216.341	16.6667	16.6667	34.6675	50	72.1137	34.6675	16.6667	50	16.6667	16.6667	16.6667	16.6667	24.0379	24.0379	16.6667	34.6675	34.6675	16.6667	16.6667	16.6667	16.6667	50	16.6667	24.0379	72.1137	24.0379	72.1137
H89	34.6675	34.6675	16.6667	50	24.0379	104.002	72.1137	150	72.1137	312.007	24.0379	216.341	312.007	16.6667	24.0379	104.002	150	104.002	34.6675	50	50	72.1137	72.1137	72.1137	216.341	216.341	216.341	312.007	150	312.007	104.002	216.341	50	104.002	104.002	34.6675
S90	150	16.6667	16.6667	50	24.0379	72.1137	150	312.007	50	150	50	34.6675	150	104.002	312.007	34.6675	150	450	50	24.0379	50	150	34.6675	450	34.6675	34.6675	34.6675	150	216.341	150	312.007	50	216.341	312.007	216.341	450
B91	24.0379	72.1137	24.0379	24.0379	104.002	16.6667	72.1137	16.6667	16.6667	72.1137	150	34.6675	16.6667	50	24.0379	16.6667	16.6667	16.6667	150	150	150	72.1137	72.1137	72.1137	50	34.6675	34.6675	34.6675	72.1137	72.1137	16.6667	16.6667	16.6667	34.6675	24.0379	34.6675
S92	16.6667	16.6667	24.0379	34.6675	16.6667	16.6667	16.6667	72.1137	50	104.002	16.6667	16.6667	16.6667	24.0379	104.002	16.6667	24.0375	216.341	16.6667	24.0379	16.6667	16.6667	16.6667	34.6675	16.6667	16.6667	16.6667	104.002	104.002	24.0379	16.6667	50	16.6667	16.6667	50	72.1137
H93	24.0379	72.1137	34.6675	24.0379	104.002	24.0379	50	16.6667	16.6667	72.1137	150	24.0379	34.6675	50	24.0379	16.6667	16.6667	16.6667	150	150	16.6667	50	50	50	16.6667	24.0379	24.0379	450	72.1137	72.1137	24.0379	16.6667	24.0379	16.6667	24.0379	16.6667
N94	34.6675	24.0379	16.6667	72.1137	50	16.6667	50	16.6667	50	16.6667	24.0379	16.6667	34.6675	24.0379	24.0379	16.6667	16.6667	16.6667	24.0379	24.0379	24.0379	50	50	50	16.6667	16.6667	16.6667	72.1137	16.6667	16.6667	16.6667	16.6667	16.6667	24.0379	34.6675	24.0379
N95	24.0379	16.6667	24.0379	24.0379	24.0379	24.0379	72.1137	72.1137	50	50	16.6667	16.6667	16.6667	150	104.002	50	34.6681	34.6675	16.6667	16.6667	24.0379	72.1137	150	24.0379	16.6667	16.6667	50	50	50	24.0379	50	72.1137	150	16.6667	24.0379	24.0379
H96	312.007	50	50	24.0379	24.0379	50	72.1137	150	104.002	72.1137	34.6675	72.1137	150	24.0379	50	216.341	72.1125	50	34.6675	50	216.341	16.6667	72.1137	16.6667	72.1137	24.0379	72.1137	72.1137	16.6667	72.1137	150	72.1137	24.0379	150	150	450
B97	34.6675	34.6675	16.6667	16.6667	24.0379	34.6675	24.0379	50	72.1137	24.0379	16.6667	24.0379	16.6667	150	104.002	216.341	16.6667	16.6667	16.6667	16.6667	16.6667	24.0379	24.0379	34.6675	24.0379	24.0379	50	24.0379	24.0379	16.6667	72.1137	150	150	150	34.6675	150
H98	150	24.0379	16.6667	50	50	50	34.6675	16.6667	34.6675	450	50	50	16.6667	34.6675	16.6667	50	16.6667	34.6675	50	50	50	34.6675	72.1137	24.0379	34.6675	50	50	312.007	450	450	16.6667	72.1137	16.6667	16.6667	24.0379	150
B99	104.002	16.6667	16.6667	16.6667	16.6667	50	16.6667	24.0379	312.007	50	16.6667	34.6675	34.6675	16.6667	24.0379	24.0379	16.6667	16.6667	24.0379	16.6667	16.6667	16.6667	16.6667	16.6667	34.6675	34.6675	24.0379	50	50	16.6667	24.0379	24.0379	34.6675	24.0379	24.0379	50
B100	16.6667	24.0379	16.6667	16.6667	312.007	16.6667	16.6667	50	150	34.6675	16.6667	16.6667	24.0379	50	24.0379	34.6675	24.0375	50	16.6667	50	16.6667	16.6667	16.6667	16.6667	16.6667	16.6667	16.6667	34.6675	34.6675	34.6675	16.6667	34.6675	16.6667	24.0379	16.6667	24.0379
B101	16.6667	16.6667	24.0379	24.0379	24.0379	16.6667	16.6667	24.0379	16.6667	16.6667	50	312.007	16.6667	16.6667	16.6667	24.0379	50	16.6667	50	24.0379	16.6667	16.6667	16.6667	16.6667	312.007	104.002	312.007	16.6667	34.6675	16.6667	34.6675	16.6667	50	16.6667	24.0379	72.1137
H102	16.6667	50	16.6667	72.1137	24.0379	50	104.002	16.6667	16.6667	72.1137	72.1137	72.1137	16.6667	24.0379	16.6667	450	104.004	150	72.1137	34.6675	24.0379	104.002	16.6667	16.6667	72.1137	72.1137	72.1137	72.1137	34.6675	72.1137	16.6667	16.6667	34.6675	72.1137	24.0379	34.6675
B103	16.6667	104.002	50	16.6667	16.6667	150	16.6667	24.0379	24.0379	104.002	16.6667	16.6667	34.6675	50	24.0379	34.6675	16.6667	34.6675	16.6667	16.6667	24.0379	16.6667	16.6667	34.6675	16.6667	16.6667	16.6667	104.002	104.002	34.6675	34.6675	16.6667	16.6667	24.0379	16.6667	16.6667
H104	16.6667	24.0379	24.0379	24.0379	24.0379	24.0379	50	72.1137	24.0379	50	16.6667	16.6667	50	150	312.007	50	16.6667	72.1137	16.6667	16.6667	16.6667	50	50	216.341	16.6667	16.6667	16.6667	50	50	24.0379	34.6675	72.1137	216.341	72.1137	16.6667	24.0379
S105	16.6667	72.1137	34.6675	16.6667	24.0379	16.6667	24.0379	72.1137	16.6667	16.6667	16.6667	34.6675	34.6675	16.6667	16.6667	16.6667	16.6667	24.0379	16.6667	16.6667	16.6667	24.0379	24.0379	24.0379	34.6675	34.6675	16.6667	16.6667	16.6667	16.6667	16.6667	24.0379	24.0379	16.6667	16.6667	16.6667
H106	34.6675	34.6675	24.0379	104.002	72.1137	50	104.002	24.0379	16.6667	24.0379	16.6667	16.6667	24.0379	216.341	450	24.0379	50	50	16.6667	16.6667	16.6667	104.002	104.002	104.002	24.0379	16.6667	16.6667	34.6675	24.0379	24.0379	216.341	150	150	104.002	72.1137	150
N107	24.0379	16.6667	16.6667	50	16.6667	34.6675	24.0379	24.0379	216.341	104.002	34.6675	16.6667	24.0379	16.6667	50	16.6667	16.6667	16.6667	34.6675	34.6675	34.6675	24.0379	16.6667	24.0379	16.6667	16.6667	16.6667	104.002	104.002	72.1137	34.6675	72.1137	24.0379	16.6667	34.6675	72.1137
H108	150	216.341	150	50	24.0379	50	50	150	72.1137	50	34.6675	72.1137	150	72.1137	50	150	50	72.1137	34.6675	34.6675	34.6675	50	50	50	72.1137	150	72.1137	50	50	50	104.002	72.1137	104.002	450	104.002	216.341
S109	16.6667	24.0379	34.6675	72.1137	450	16.6667	50	16.6667	16.6667	104.002	216.341	24.0379	16.6667	16.6667	34.6675	24.0379	16.6667	16.6667	216.341	216.341	216.341	50	50	16.6667	24.0379	24.0379	24.0379	16.6667	104.002	104.002	24.0379	24.0379	34.6675	16.6667	50	16.6667
H110	104.002	50	450	72.1137	50	34.6675	450	34.6675	50	34.6675	104.002	150	104.002	104.002	16.6667	24.0379	150	34.6675	72.1137	104.002	104.002	450	450	450	150	16.6667	150	34.6675	104.002	34.6675	72.1137	24.0379	34.6675	34.6675	72.1137	72.1137
S111	16.6667	24.0379	50	16.6667	24.0379	16.6667	34.6675	216.341	16.6667	50	16.6667	24.0379	16.6667	24.0379	104.002	16.6667	16.6667	34.6675	16.6667	216.341	34.6675	34.6675	24.0379	34.6675	24.0379	24.0379	16.6667	50	50	24.0379	24.0379	24.0379	72.1137	16.6667	16.6667	24.0379
H112	150	50	16.6667	34.6675	34.6675	34.6675	312.007	24.0379	50	24.0379	24.0379	104.002	104.002	150	50	16.6667	24.0375	216.341	24.0379	24.0379	50	312.007	312.007	104.002	104.002	104.002	104.002	24.0379	104.002	24.0379	16.6667	150	24.0379	24.0379	16.6667	16.6667
S113	34.6675	24.0379	312.007	216.341	72.1137	72.1137	50	24.0379	16.6667	16.6667	24.0379	72.1137	104.002	104.002	150	104.002	150	50	24.0379	24.0379	24.0379	50	50	16.6667	50	72.1137	72.1137	312.007	16.6667	16.6667	312.007	216.341	450	104.002	34.6675	450
H114	16.6667	24.0379	24.0379	16.6667	24.0379	34.6675	72.1137	50	24.0379	24.0379	24.0379	50	50	104.002	104.002	50	34.6681	72.1137	24.0379	24.0379	24.0379	72.1137	450	72.1137	50	50	50	24.0379	24.0379	34.6675	24.0379	72.1137	450	104.002	16.6667	72.1137
N115	16.6667	150	50	16.6667	150	16.6667	34.6675	34.6675	104.002	24.0379	16.6667	24.0379	16.6667	24.0379	24.0379	16.6667	16.6667	24.0379	16.6667	312.007	16.6667	34.6675	34.6675	450	24.0379	24.0379	16.6667	24.0379	24.0379	16.6667	16.6667	34.6675	24.0379	34.6675	34.6675	16.6667
N116	16.6667	16.6667	16.6667	72.1137	34.6675	50	104.002	24.0379	24.0379	34.6675	72.1137	16.6667	16.6667	16.6667	50	50	72.1125	16.6667	72.1137	24.0379	72.1137	16.6667	104.002	72.1137	34.6675	16.6667	16.6667	50	34.6675	34.6675	104.002	72.1137	24.0379	72.1137	312.007	24.0379
S117	34.6675	16.6667	16.6667	24.0379	16.6667	24.0379	24.0379	24.0379	216.341	24.0379	24.0379	24.0379	50	34.6675	24.0379	24.0379	16.6667	16.6667	34.6675	24.0379	24.0379	150	24.0379	24.0379	24.0379	24.0379	16.6667	24.0379	24.0379	72.1137	50	24.0379	24.0379	72.1137	72.1137	34.6675
H118	24.0379	24.0379	24.0379	16.6667	24.0379	24.0379	24.0379	50	72.1137	24.0379	16.6667	16.6667	34.6675	104.002	50	104.002	34.6681	24.0379	16.6667	216.341	16.6667	24.0379	24.0379	34.6675	16.6667	16.6667	16.6667	24.0379	24.0379	16.6667	50	72.1137	150	34.6675	16.6667	16.6667
B119	104.002	24.0379	16.6667	24.0379	24.0379	24.0379	24.0379	16.6667	24.0379	450	72.1137	24.0379	34.6675	16.6667	72.1137	150	16.6667	50	16.6667	72.1137	50	24.0379	50	24.0379	104.002	24.0379	24.0379	24.0379	450	450	34.6675	34.6675	24.0379	50	24.0379	72.1137
S120	16.6667	24.0379	50	50	312.007	16.6667	50	16.6667	24.0379	104.002	216.341	24.0379	16.6667	24.0379	24.0379	16.6667	24.0375	16.6667	216.341	216.341	216.341	50	34.6675	50	72.1137	24.0379	24.0379	24.0379	104.002	104.002	16.6667	34.6675	34.6675	16.6667	34.6675	34.6675
N121	16.6667	104.002	24.0379	34.6675	24.0379	24.0379	16.6667	72.1137	24.0379	16.6667	16.6667	16.6667	16.6667	24.0379	50	16.6667	24.0375	24.0379	16.6667	16.6667	104.002	16.6667	72.1137	34.6675	16.6667	16.6667	16.6667	16.6667	16.6667	16.6667	24.0379	24.0379	16.6667	50	24.0379	34.6675
B122	24.0379	24.0379	50	104.002	24.0379	24.0379	16.6667	50	150	16.6667	16.6667	16.6667	34.6675	16.6667	50	34.6675	16.6667	24.0379	216.341	16.6667	50	16.6667	16.6667	16.6667	16.6667	16.6667	24.0379	16.6667	16.6667	16.6667	34.6675	50	16.6667	50	34.6675	34.6675
H123	34.6675	150	24.0379	24.0379	104.002	24.0379	50	16.6667	16.6667	216.341	150	34.6675	34.6675	34.6675	34.6675	16.6667	16.6667	16.6667	150	150	24.0379	50	50	24.0379	24.0379	34.6675	34.6675	24.0379	216.341	216.341	24.0379	16.6667	16.6667	16.6667	16.6667	34.6675
S124	24.0379	16.6667	16.6667	72.1137	50	16.6667	34.6675	16.6667	24.0379	50	104.002	16.6667	16.6667	24.0379	24.0379	16.6667	16.6667	16.6667	104.002	104.002	104.002	34.6675	104.002	34.6675	16.6667	16.6667	16.6667	24.0379	50	50	24.0379	34.6675	50	72.1137	34.6675	16.6667
H125	34.6675	24.0379	16.6667	104.002	72.1137	50	104.002	16.6667	16.6667	16.6667	16.6667	16.6667	50	450	216.341	24.0379	50	34.6675	16.6667	16.6667	16.6667	104.002	216.341	104.002	16.6667	16.6667	16.6667	34.6675	16.6667	16.6667	104.002	104.002	450	216.341	72.1137	312.007
S126	34.6675	16.6667	50	16.6667	16.6667	24.0379	16.6667	24.0379	104.002	16.6667	50	16.6667	16.6667	16.6667	16.6667	150	34.6681	72.1137	50	150	24.0379	16.6667	16.6667	16.6667	16.6667	16.6667	16.6667	16.6667	16.6667	24.0379	72.1137	24.0379	34.6675	72.1137	72.1137	16.6667
H127	16.6667	16.6667	24.0379	50	16.6667	24.0379	104.002	24.0379	24.0379	50	216.341	16.6667	16.6667	24.0379	24.0379	34.6675	50	16.6667	216.341	216.341	24.0379	104.002	104.002	104.002	24.0379	16.6667	16.6667	24.0379	50	50	72.1137	34.6675	16.6667	50	72.1137	16.6667
S128	34.6675	16.6667	50	16.6667	16.6667	24.0379	24.0379	34.6675	24.0379	16.6667	16.6667	16.6667	34.6675	34.6675	34.6675	50	104.004	72.1137	16.6667	34.6675	16.6667	24.0379	150	50	16.6667	16.6667	16.6667	16.6667	16.6667	24.0379	104.002	16.6667	34.6675	16.6667	24.0379	34.6675
H129	34.6675	16.6667	16.6667	104.002	16.6667	34.6675	16.6667	16.6667	216.341	216.341	24.0379	16.6667	24.0379	50	16.6667	50	16.6667	24.0379	24.0379	24.0379	34.6675	16.6667	24.0379	50	16.6667	16.6667	50	216.341	216.341	16.6667	24.0379	34.6675	24.0379	72.1137	34.6675	24.0379
S130	16.6667	16.6667	16.6667	16.6667	24.0379	16.6667	16.6667	24.0379	50	16.6667	50	216.341	50	50	24.0379	16.6667	72.1125	24.0379	50	50	50	16.6667	16.6667	16.6667	216.341	72.1137	216.341	16.6667	16.6667	16.6667	50	16.6667	34.6675	16.6667	16.6667	34.6675
N131	16.6667	24.0379	16.6667	16.6667	24.0379	34.6675	16.6667	150	16.6667	34.6675	24.0379	150	24.0379	50	50	16.6667	50	50	16.6667	24.0379	24.0379	50	24.0379	16.6667	150	72.1137	150	34.6675	50	34.6675	50	16.6667	104.002	34.6675	16.6667	34.6675
S132	24.0379	16.6667	16.6667	34.6675	50	16.6667	50	16.6667	24.0379	34.6675	312.007	16.6667	16.6667	16.6667	16.6667	16.6667	16.6667	16.6667	312.007	312.007	312.007	50	50	16.6667	34.6675	16.6667	16.6667	24.0379	34.6675	34.6675	50	16.6667	24.0379	50	50	24.0379
B133	24.0379	16.6667	34.6675	16.6667	16.6667	150	34.6675	16.6667	16.6667	24.0379	16.6667	16.6667	16.6667	16.6667	34.6675	50	24.0375	24.0379	16.6667	16.6667	16.6667	34.6675	34.6675	16.6667	16.6667	16.6667	50	24.0379	24.0379	16.6667	16.6667	34.6675	16.6667	50	34.6675	16.6667
N134	150	34.6675	16.6667	50	34.6675	72.1137	24.0379	16.6667	24.0379	104.002	34.6675	72.1137	34.6675	34.6675	104.002	50	34.6681	104.002	34.6675	24.0379	34.6675	24.0379	24.0379	24.0379	24.0379	72.1137	72.1137	450	104.002	104.002	34.6675	150	450	24.0379	34.6675	104.002
B135	24.0379	16.6667	16.6667	450	16.6667	104.002	16.6667	16.6667	150	72.1137	34.6675	24.0379	16.6667	24.0379	16.6667	50	16.6667	16.6667	50	34.6675	34.6675	72.1137	16.6667	16.6667	24.0379	24.0379	24.0379	72.1137	72.1137	16.6667	34.6675	34.6675	24.0379	34.6675	16.6667	24.0379
S136	16.6667	104.002	24.0379	16.6667	216.341	24.0379	24.0379	34.6675	150	16.6667	16.6667	24.0379	34.6675	50	16.6667	16.6667	16.6667	24.0379	16.6667	16.6667	16.6667	24.0379	24.0379	24.0379	24.0379	24.0379	16.6667	16.6667	16.6667	50	24.0379	34.6675	16.6667	24.0379	34.6675	34.6675
H137	16.6667	16.6667	34.6675	50	16.6667	16.6667	216.341	34.6675	24.0379	50	450	24.0379	72.1137	24.0379	16.6667	16.6667	24.0375	16.6667	34.6675	450	34.6675	216.341	216.341	16.6667	16.6667	24.0379	24.0379	24.0379	50	50	72.1137	16.6667	16.6667	16.6667	24.0379	16.6667
S138	34.6675	24.0379	104.002	34.6675	450	16.6667	50	16.6667	50	16.6667	50	34.6675	16.6667	16.6667	16.6667	24.0379	16.6667	16.6667	50	50	50	50	50	50	16.6667	34.6675	34.6675	34.6675	16.6667	16.6667	16.6667	16.6667	16.6667	24.0379	24.0379	24.0379
H139	24.0379	50	24.0379	450	50	50	72.1137	16.6667	16.6667	16.6667	16.6667	16.6667	34.6675	104.002	216.341	50	72.1125	24.0379	16.6667	16.6667	16.6667	72.1137	34.6675	24.0379	50	16.6667	16.6667	150	16.6667	16.6667	216.341	104.002	104.002	450	312.007	104.002
N140	16.6667	312.007	34.6675	24.0379	24.0379	16.6667	24.0379	312.007	16.6667	16.6667	24.0379	50	34.6675	16.6667	16.6667	16.6667	16.6667	24.0379	24.0379	16.6667	24.0379	24.0379	16.6667	50	50	104.002	50	16.6667	34.6675	16.6667	16.6667	24.0379	16.6667	34.6675	16.6667	16.6667
N141	16.6667	24.0379	34.6675	24.0379	24.0379	16.6667	24.0379	150	16.6667	16.6667	24.0379	34.6675	24.0379	16.6667	50	24.0379	16.6667	16.6667	24.0379	16.6667	24.0379	24.0379	24.0379	24.0379	34.6675	34.6675	34.6675	16.6667	34.6675	16.6667	16.6667	24.0379	16.6667	16.6667	16.6667	16.6667
S142	24.0379	312.007	34.6675	216.341	104.002	150	16.6667	16.6667	24.0379	50	24.0379	24.0379	24.0379	16.6667	16.6667	24.0379	16.6667	16.6667	24.0379	24.0379	24.0379	16.6667	16.6667	34.6675	34.6675	24.0379	24.0379	24.0379	50	50	34.6675	24.0379	16.6667	24.0379	24.0379	16.6667
H143	50	34.6675	104.002	50	24.0379	34.6675	150	216.341	16.6667	34.6675	50	150	24.0379	24.0379	24.0379	34.6675	450	34.6675	50	50	24.0379	150	150	24.0379	150	150	150	34.6675	34.6675	34.6675	16.6667	16.6667	16.6667	312.007	16.6667	104.002
H144	24.0379	24.0379	50	72.1137	34.6675	104.002	72.1137	34.6675	24.0379	16.6667	50	150	216.341	72.1137	50	150	104.004	34.6675	50	50	16.6667	72.1137	72.1137	34.6675	24.0379	150	150	50	16.6667	16.6667	24.0379	216.341	34.6675	150	150	16.6667
S145	104.002	24.0379	16.6667	104.002	24.0379	16.6667	50	24.0379	24.0379	24.0379	50	50	34.6675	24.0379	16.6667	16.6667	16.6667	312.007	50	50	50	50	150	50	104.002	50	50	16.6667	24.0379	24.0379	16.6667	34.6675	16.6667	16.6667	16.6667	34.6675
H146	72.1137	34.6675	216.341	72.1137	24.0379	24.0379	150	24.0379	50	450	16.6667	150	104.002	34.6675	150	150	150	50	16.6667	16.6667	16.6667	16.6667	150	104.002	150	50	150	450	16.6667	450	50	150	72.1137	216.341	450	150
S147	16.6667	24.0379	24.0379	24.0379	24.0379	16.6667	16.6667	104.002	16.6667	216.341	34.6675	50	16.6667	24.0379	16.6667	16.6667	16.6667	24.0379	34.6675	34.6675	16.6667	16.6667	16.6667	16.6667	50	50	50	216.341	24.0379	216.341	16.6667	34.6675	16.6667	16.6667	34.6675	72.1137
H148	24.0379	24.0379	24.0379	24.0379	104.002	16.6667	50	16.6667	16.6667	72.1137	150	24.0379	16.6667	16.6667	34.6675	24.0379	34.6681	16.6667	150	16.6667	16.6667	50	50	50	104.002	24.0379	24.0379	24.0379	72.1137	72.1137	24.0379	16.6667	16.6667	50	50	34.6675
S149	50	72.1137	34.6675	24.0379	24.0379	16.6667	34.6675	50	16.6667	24.0379	16.6667	16.6667	16.6667	16.6667	34.6675	16.6667	16.6667	16.6667	16.6667	50	34.6675	34.6675	34.6675	34.6675	16.6667	216.341	16.6667	24.0379	50	24.0379	34.6675	50	16.6667	16.6667	24.0379	34.6675
H150	50	24.0379	72.1137	104.002	312.007	34.6675	16.6667	16.6667	24.0379	150	34.6675	34.6675	34.6675	24.0379	50	34.6675	24.0375	50	34.6675	34.6675	34.6675	16.6667	24.0379	16.6667	24.0379	34.6675	34.6675	50	150	150	34.6675	16.6667	72.1137	24.0379	50	24.0379
N151	16.6667	150	34.6675	24.0379	24.0379	16.6667	24.0379	150	16.6667	16.6667	16.6667	50	24.0379	24.0379	50	16.6667	16.6667	24.0379	24.0379	24.0379	24.0379	24.0379	24.0379	24.0379	50	150	50	16.6667	104.002	16.6667	16.6667	16.6667	16.6667	24.0379	24.0379	50
N152	16.6667	16.6667	16.6667	16.6667	24.0379	16.6667	16.6667	150	16.6667	16.6667	34.6675	50	24.0379	16.6667	24.0379	16.6667	24.0375	34.6675	34.6675	34.6675	16.6667	16.6667	16.6667	16.6667	50	72.1137	50	16.6667	24.0379	16.6667	24.0379	16.6667	16.6667	24.0379	16.6667	16.6667
S153	24.0379	24.0379	72.1137	16.6667	24.0379	34.6675	16.6667	24.0379	34.6675	16.6667	16.6667	16.6667	16.6667	24.0379	16.6667	34.6675	34.6681	34.6675	16.6667	16.6667	16.6667	16.6667	34.6675	16.6667	16.6667	72.1137	16.6667	16.6667	50	16.6667	16.6667	24.0379	50	16.6667	24.0379	16.6667
H154	24.0379	50	16.6667	50	24.0379	50	312.007	50	16.6667	24.0379	104.002	216.341	16.6667	16.6667	16.6667	450	72.1125	150	104.002	104.002	104.002	312.007	104.002	312.007	216.341	104.002	216.341	24.0379	216.341	24.0379	24.0379	16.6667	16.6667	34.6675	24.0379	24.0379
N155	16.6667	104.002	24.0379	16.6667	216.341	16.6667	24.0379	50	104.002	16.6667	16.6667	34.6675	16.6667	16.6667	24.0379	16.6667	16.6667	24.0379	16.6667	16.6667	16.6667	24.0379	24.0379	24.0379	34.6675	34.6675	24.0379	16.6667	16.6667	16.6667	24.0379	16.6667	24.0379	16.6667	24.0379	34.6675
H156	34.6675	24.0379	216.341	104.002	72.1137	72.1137	216.341	24.0379	16.6667	16.6667	16.6667	50	50	216.341	216.341	16.6667	72.1125	34.6675	16.6667	24.0379	72.1137	216.341	216.341	50	24.0379	50	50	34.6675	16.6667	16.6667	150	150	450	104.002	104.002	312.007
S157	16.6667	24.0379	16.6667	24.0379	16.6667	16.6667	16.6667	34.6675	104.002	16.6667	24.0379	312.007	50	16.6667	16.6667	34.6675	72.1125	24.0379	312.007	24.0379	24.0379	16.6667	16.6667	24.0379	312.007	216.341	312.007	16.6667	72.1137	16.6667	72.1137	24.0379	16.6667	16.6667	50	24.0379
H158	104.002	16.6667	16.6667	104.002	16.6667	16.6667	150	24.0379	24.0379	16.6667	34.6675	150	34.6675	24.0379	72.1137	72.1137	34.6681	104.002	34.6675	34.6675	24.0379	150	150	150	24.0379	150	150	50	16.6667	16.6667	16.6667	50	72.1137	24.0379	50	24.0379
S159	24.0379	16.6667	16.6667	16.6667	16.6667	16.6667	16.6667	24.0379	72.1137	16.6667	16.6667	24.0379	24.0379	34.6675	16.6667	24.0379	16.6667	16.6667	16.6667	16.6667	104.002	16.6667	16.6667	16.6667	24.0379	24.0379	50	16.6667	16.6667	34.6675	16.6667	24.0379	34.6675	16.6667	34.6675	34.6675
H160	16.6667	24.0379	24.0379	104.002	50	50	150	16.6667	24.0379	16.6667	24.0379	16.6667	34.6675	24.0379	72.1137	72.1137	72.1125	16.6667	24.0379	16.6667	24.0379	16.6667	24.0379	50	50	16.6667	16.6667	104.002	16.6667	16.6667	150	104.002	16.6667	104.002	450	34.6675
S161	104.002	72.1137	34.6675	16.6667	24.0379	16.6667	24.0379	72.1137	16.6667	16.6667	16.6667	34.6675	24.0379	24.0379	16.6667	16.6667	16.6667	24.0379	16.6667	16.6667	16.6667	24.0379	34.6675	24.0379	34.6675	34.6675	16.6667	16.6667	16.6667	16.6667	34.6675	50	24.0379	16.6667	50	16.6667
H162	24.0379	16.6667	16.6667	150	50	24.0379	50	16.6667	24.0379	34.6675	24.0379	16.6667	16.6667	104.002	50	16.6667	50	24.0379	24.0379	24.0379	24.0379	50	50	50	24.0379	16.6667	16.6667	150	34.6675	34.6675	16.6667	50	24.0379	34.6675	24.0379	104.002
B163	34.6675	24.0379	16.6667	312.007	16.6667	16.6667	24.0379	16.6667	34.6675	34.6675	16.6667	24.0379	24.0379	16.6667	16.6667	50	24.0375	150	16.6667	16.6667	72.1137	24.0379	24.0379	24.0379	24.0379	24.0379	24.0379	34.6675	34.6675	34.6675	16.6667	16.6667	50	34.6675	24.0379	16.6667
H164	34.6675	16.6667	16.6667	450	16.6667	34.6675	34.6675	16.6667	312.007	150	34.6675	24.0379	50	34.6675	16.6667	16.6667	16.6667	16.6667	34.6675	72.1137	16.6667	34.6675	34.6675	34.6675	24.0379	24.0379	16.6667	150	150	72.1137	24.0379	24.0379	34.6675	50	72.1137	16.6667
N165	34.6675	16.6667	72.1137	150	150	16.6667	24.0379	16.6667	50	24.0379	34.6675	24.0379	24.0379	16.6667	16.6667	50	16.6667	216.341	34.6675	34.6675	16.6667	24.0379	150	16.6667	50	24.0379	24.0379	450	24.0379	24.0379	24.0379	24.0379	34.6675	34.6675	34.6675	24.0379
S166	24.0379	24.0379	24.0379	16.6667	16.6667	16.6667	34.6675	24.0379	24.0379	34.6675	24.0379	16.6667	24.0379	34.6675	34.6675	50	104.004	216.341	24.0379	24.0379	24.0379	34.6675	34.6675	312.007	16.6667	34.6675	16.6667	34.6675	72.1137	34.6675	72.1137	16.6667	24.0379	16.6667	16.6667	24.0379
S167	24.0379	16.6667	34.6675	72.1137	16.6667	16.6667	16.6667	24.0379	312.007	16.6667	34.6675	16.6667	72.1137	34.6675	50	150	34.6681	24.0379	34.6675	34.6675	34.6675	16.6667	16.6667	16.6667	16.6667	16.6667	16.6667	16.6667	16.6667	16.6667	72.1137	16.6667	24.0379	216.341	104.002	16.6667
B168	50	24.0379	16.6667	72.1137	16.6667	24.0379	24.0379	16.6667	34.6675	216.341	34.6675	24.0379	16.6667	16.6667	72.1137	72.1137	16.6667	72.1137	24.0379	34.6675	24.0379	24.0379	16.6667	34.6675	24.0379	24.0379	24.0379	24.0379	216.341	216.341	24.0379	24.0379	72.1137	16.6667	16.6667	24.0379
N169	16.6667	34.6675	16.6667	24.0379	24.0379	24.0379	50	34.6675	50	34.6675	16.6667	16.6667	216.341	24.0379	16.6667	16.6667	24.0375	24.0379	16.6667	16.6667	16.6667	50	50	16.6667	50	16.6667	16.6667	312.007	34.6675	34.6675	216.341	24.0379	16.6667	72.1137	24.0379	16.6667
N170	104.002	104.002	24.0379	24.0379	50	16.6667	16.6667	150	16.6667	216.341	24.0379	24.0379	16.6667	24.0379	16.6667	16.6667	24.0375	16.6667	24.0379	24.0379	34.6675	16.6667	16.6667	16.6667	24.0379	24.0379	24.0379	216.341	34.6675	216.341	16.6667	16.6667	24.0379	34.6675	34.6675	34.6675
H171	150	24.0379	104.002	50	34.6675	24.0379	216.341	16.6667	50	450	72.1137	150	72.1137	312.007	150	16.6667	72.1125	104.002	72.1137	72.1137	72.1137	216.341	216.341	216.341	150	72.1137	150	450	450	450	16.6667	34.6675	216.341	104.002	450	312.007
S172	24.0379	50	24.0379	34.6675	24.0379	72.1137	150	450	72.1137	312.007	16.6667	216.341	104.002	24.0379	50	72.1137	104.004	72.1137	16.6667	34.6675	16.6667	150	16.6667	150	216.341	450	216.341	312.007	24.0379	312.007	450	72.1137	24.0379	24.0379	34.6675	34.6675
H173	16.6667	16.6667	16.6667	16.6667	16.6667	16.6667	16.6667	16.6667	16.6667	16.6667	16.6667	16.6667	16.6667	16.6667	16.6667	16.6667	16.6667	16.6667	16.6667	16.6667	16.6667	16.6667	16.6667	16.6667	16.6667	16.6667	16.6667	16.6667	16.6667	16.6667	16.6667	16.6667	16.6667	16.6667	16.6667	16.6667
S174	24.0379	104.002	72.1137	216.341	216.341	24.0379	16.6667	16.6667	34.6675	34.6675	34.6675	16.6667	16.6667	24.0379	16.6667	24.0379	24.0375	24.0379	34.6675	34.6675	34.6675	16.6667	16.6667	16.6667	24.0379	16.6667	16.6667	16.6667	34.6675	34.6675	16.6667	24.0379	16.6667	16.6667	34.6675	16.6667
H175	34.6675	72.1137	24.0379	24.0379	104.002	16.6667	34.6675	24.0379	16.6667	312.007	50	34.6675	16.6667	50	16.6667	16.6667	24.0375	16.6667	50	104.002	16.6667	34.6675	34.6675	34.6675	24.0379	34.6675	34.6675	104.002	312.007	312.007	16.6667	16.6667	34.6675	16.6667	16.6667	24.0379
S176	50	34.6675	216.341	24.0379	34.6675	34.6675	34.6675	50	450	16.6667	16.6667	24.0379	16.6667	72.1137	24.0379	72.1137	24.0375	24.0379	16.6667	16.6667	16.6667	34.6675	34.6675	34.6675	24.0379	24.0379	16.6667	16.6667	16.6667	24.0379	50	16.6667	104.002	24.0379	16.6667	24.0379
B177	16.6667	16.6667	24.0379	104.002	34.6675	16.6667	216.341	16.6667	24.0379	34.6675	216.341	16.6667	16.6667	72.1137	24.0379	16.6667	16.6667	16.6667	216.341	216.341	216.341	72.1137	216.341	216.341	24.0379	16.6667	16.6667	104.002	34.6675	34.6675	50	24.0379	16.6667	24.0379	16.6667	16.6667
S178	50	50	312.007	104.002	50	24.0379	216.341	24.0379	16.6667	24.0379	34.6675	150	104.002	24.0379	150	150	104.004	50	34.6675	150	34.6675	216.341	216.341	216.341	150	104.002	150	24.0379	34.6675	24.0379	16.6667	72.1137	104.002	150	150	150
B179	16.6667	24.0379	16.6667	16.6667	16.6667	34.6675	34.6675	34.6675	150	72.1137	16.6667	16.6667	16.6667	24.0379	16.6667	16.6667	16.6667	16.6667	50	50	216.341	216.341	50	16.6667	16.6667	16.6667	24.0379	72.1137	72.1137	34.6675	34.6675	16.6667	24.0379	24.0379	24.0379	34.6675
S180	16.6667	50	34.6675	34.6675	24.0379	16.6667	24.0379	72.1137	50	34.6675	16.6667	24.0379	16.6667	16.6667	72.1137	24.0379	24.0375	50	16.6667	16.6667	16.6667	24.0379	312.007	16.6667	24.0379	24.0379	24.0379	34.6675	34.6675	104.002	24.0379	50	16.6667	24.0379	34.6675	34.6675
H181	34.6675	24.0379	16.6667	72.1137	50	24.0379	34.6675	16.6667	50	150	24.0379	16.6667	24.0379	72.1137	16.6667	34.6675	24.0375	34.6675	24.0379	24.0379	34.6675	34.6675	34.6675	34.6675	16.6667	16.6667	16.6667	24.0379	150	150	16.6667	50	50	34.6675	16.6667	150
S182	312.007	24.0379	50	24.0379	24.0379	34.6675	450	16.6667	72.1137	16.6667	72.1137	72.1137	24.0379	34.6675	24.0379	24.0379	150	34.6675	72.1137	72.1137	72.1137	450	450	50	72.1137	16.6667	72.1137	16.6667	24.0379	16.6667	50	16.6667	72.1137	72.1137	150	72.1137
N183	16.6667	34.6675	16.6667	34.6675	16.6667	16.6667	16.6667	34.6675	72.1137	24.0379	34.6675	50	72.1137	34.6675	24.0379	34.6675	34.6681	24.0379	34.6675	34.6675	34.6675	16.6667	312.007	150	50	24.0379	50	24.0379	16.6667	24.0379	72.1137	50	16.6667	16.6667	50	16.6667
N184	16.6667	24.0379	16.6667	72.1137	16.6667	24.0379	16.6667	34.6675	150	24.0379	16.6667	24.0379	16.6667	24.0379	24.0379	16.6667	16.6667	16.6667	16.6667	16.6667	16.6667	16.6667	16.6667	16.6667	24.0379	24.0379	16.6667	24.0379	24.0379	24.0379	16.6667	16.6667	50	34.6675	50	50
H185	24.0379	16.6667	34.6675	50	16.6667	16.6667	216.341	24.0379	24.0379	50	150	34.6675	16.6667	50	16.6667	16.6667	24.0375	16.6667	150	150	50	216.341	16.6667	16.6667	16.6667	34.6675	34.6675	34.6675	50	50	34.6675	50	16.6667	16.6667	24.0379	16.6667
S186	34.6675	16.6667	50	450	104.002	450	16.6667	24.0379	34.6675	104.002	24.0379	50	16.6667	24.0379	16.6667	24.0379	16.6667	34.6675	24.0379	24.0379	24.0379	104.002	24.0379	16.6667	50	50	50	104.002	24.0379	104.002	16.6667	16.6667	16.6667	16.6667	24.0379	16.6667
H187	24.0379	16.6667	50	216.341	16.6667	16.6667	34.6675	34.6675	34.6675	16.6667	34.6675	24.0379	72.1137	16.6667	50	216.341	50	50	34.6675	16.6667	34.6675	34.6675	34.6675	34.6675	24.0379	24.0379	16.6667	16.6667	16.6667	104.002	104.002	16.6667	16.6667	216.341	24.0379	72.1137
S188	16.6667	34.6675	72.1137	150	312.007	16.6667	34.6675	16.6667	16.6667	16.6667	312.007	24.0379	34.6675	50	16.6667	50	24.0375	24.0379	312.007	312.007	312.007	34.6675	34.6675	34.6675	16.6667	24.0379	24.0379	24.0379	16.6667	16.6667	34.6675	16.6667	34.6675	16.6667	16.6667	50
N189	24.0379	24.0379	16.6667	450	16.6667	34.6675	24.0379	24.0379	72.1137	34.6675	16.6667	24.0379	16.6667	50	24.0379	24.0379	24.0375	16.6667	16.6667	50	16.6667	24.0379	24.0379	24.0379	24.0379	24.0379	24.0379	34.6675	34.6675	24.0379	24.0379	24.0379	24.0379	16.6667	16.6667	16.6667
B190	16.6667	34.6675	50	16.6667	16.6667	150	24.0379	16.6667	24.0379	16.6667	16.6667	16.6667	24.0379	16.6667	24.0379	34.6675	16.6667	16.6667	16.6667	16.6667	16.6667	24.0379	24.0379	24.0379	16.6667	16.6667	16.6667	16.6667	16.6667	104.002	24.0379	34.6675	34.6675	50	24.0379	24.0379
H191	24.0379	24.0379	16.6667	24.0379	16.6667	34.6675	216.341	450	50	312.007	24.0379	104.002	50	34.6675	24.0379	72.1137	312.013	104.002	24.0379	24.0379	16.6667	216.341	216.341	24.0379	104.002	150	104.002	312.007	24.0379	312.007	104.002	24.0379	24.0379	72.1137	16.6667	24.0379
N192	16.6667	24.0379	50	24.0379	16.6667	24.0379	150	104.002	16.6667	16.6667	24.0379	16.6667	104.002	312.007	216.341	150	50	50	24.0379	24.0379	34.6675	150	150	16.6667	16.6667	16.6667	16.6667	16.6667	16.6667	72.1137	150	104.002	50	104.002	16.6667	104.002
N193	72.1137	104.002	34.6675	24.0379	24.0379	16.6667	16.6667	216.341	16.6667	24.0379	24.0379	50	16.6667	24.0379	16.6667	16.6667	16.6667	16.6667	24.0379	24.0379	24.0379	16.6667	16.6667	16.6667	50	72.1137	50	24.0379	150	24.0379	24.0379	24.0379	16.6667	34.6675	16.6667	24.0379
N194	104.002	34.6675	16.6667	34.6675	50	50	24.0379	16.6667	24.0379	450	104.002	50	50	24.0379	72.1137	72.1137	16.6667	24.0379	104.002	104.002	24.0379	24.0379	24.0379	24.0379	72.1137	50	50	72.1137	450	450	34.6675	34.6675	104.002	34.6675	24.0379	104.002
S195	72.1137	150	34.6675	24.0379	34.6675	24.0379	16.6667	50	24.0379	216.341	72.1137	24.0379	24.0379	16.6667	16.6667	16.6667	16.6667	16.6667	72.1137	72.1137	72.1137	16.6667	16.6667	16.6667	24.0379	216.341	24.0379	216.341	50	216.341	24.0379	24.0379	24.0379	34.6675	50	16.6667
H196	72.1137	34.6675	16.6667	50	72.1137	34.6675	50	24.0379	50	450	16.6667	24.0379	50	104.002	104.002	34.6675	34.6681	72.1137	312.007	16.6667	50	50	50	16.6667	24.0379	24.0379	24.0379	312.007	450	450	16.6667	72.1137	150	150	72.1137	104.002
S197	24.0379	34.6675	50	16.6667	16.6667	150	34.6675	24.0379	24.0379	72.1137	16.6667	16.6667	16.6667	24.0379	24.0379	16.6667	50	50	16.6667	16.6667	16.6667	34.6675	34.6675	150	16.6667	16.6667	16.6667	72.1137	72.1137	16.6667	24.0379	16.6667	34.6675	24.0379	16.6667	24.0379
H198	16.6667	24.0379	16.6667	16.6667	16.6667	16.6667	24.0379	312.007	16.6667	34.6675	24.0379	72.1137	24.0379	24.0379	104.002	34.6675	16.6667	50	24.0379	34.6675	24.0379	24.0379	24.0379	24.0379	72.1137	24.0379	72.1137	34.6675	16.6667	34.6675	16.6667	16.6667	16.6667	34.6675	24.0379	34.6675
S199	34.6675	50	16.6667	16.6667	16.6667	24.0379	24.0379	34.6675	150	34.6675	16.6667	24.0379	16.6667	16.6667	34.6675	34.6675	16.6667	24.0379	34.6675	16.6667	16.6667	24.0379	24.0379	72.1137	24.0379	24.0379	16.6667	34.6675	34.6675	34.6675	16.6667	50	72.1137	16.6667	34.6675	16.6667
H200	16.6667	24.0379	16.6667	72.1137	50	24.0379	312.007	16.6667	24.0379	16.6667	150	16.6667	16.6667	24.0379	50	34.6675	50	24.0379	150	150	150	34.6675	450	72.1137	16.6667	16.6667	16.6667	50	16.6667	16.6667	24.0379	72.1137	16.6667	50	24.0379	24.0379
B201	104.002	24.0379	16.6667	24.0379	16.6667	24.0379	34.6675	34.6675	216.341	24.0379	16.6667	50	16.6667	16.6667	24.0379	24.0379	16.6667	24.0379	216.341	16.6667	16.6667	34.6675	34.6675	24.0379	50	50	16.6667	24.0379	24.0379	34.6675	24.0379	24.0379	72.1137	16.6667	16.6667	16.6667
H202	16.6667	16.6667	24.0379	34.6675	24.0379	24.0379	50	72.1137	24.0379	104.002	16.6667	16.6667	24.0379	150	312.007	50	16.6667	72.1137	16.6667	50	16.6667	50	50	216.341	16.6667	16.6667	24.0379	104.002	104.002	16.6667	24.0379	72.1137	150	72.1137	34.6675	24.0379
S203	24.0379	150	24.0379	24.0379	104.002	16.6667	72.1137	16.6667	16.6667	150	150	24.0379	24.0379	16.6667	16.6667	16.6667	16.6667	16.6667	150	104.002	16.6667	72.1137	150	72.1137	16.6667	24.0379	24.0379	24.0379	150	150	24.0379	50	16.6667	50	24.0379	34.6675
H204	50	34.6675	50	72.1137	16.6667	34.6675	72.1137	24.0379	50	312.007	24.0379	150	450	24.0379	72.1137	216.341	312.013	72.1137	24.0379	72.1137	24.0379	72.1137	72.1137	72.1137	150	312.007	150	312.007	216.341	312.007	72.1137	450	34.6675	216.341	150	72.1137
N205	16.6667	450	24.0379	24.0379	34.6675	16.6667	16.6667	72.1137	16.6667	50	24.0379	34.6675	16.6667	50	34.6675	16.6667	16.6667	24.0379	72.1137	34.6675	24.0379	34.6675	312.007	16.6667	34.6675	216.341	34.6675	50	16.6667	50	24.0379	34.6675	24.0379	34.6675	24.0379	24.0379
N206	16.6667	72.1137	34.6675	24.0379	24.0379	16.6667	16.6667	72.1137	16.6667	16.6667	16.6667	50	16.6667	24.0379	50	16.6667	24.0375	16.6667	16.6667	16.6667	16.6667	16.6667	16.6667	34.6675	50	50	16.6667	16.6667	16.6667	50	24.0379	24.0379	16.6667	50	16.6667	16.6667
N207	72.1137	72.1137	24.0379	24.0379	104.002	104.002	24.0379	24.0379	16.6667	104.002	150	24.0379	16.6667	24.0379	24.0379	16.6667	16.6667	16.6667	150	150	16.6667	24.0379	24.0379	50	34.6675	24.0379	24.0379	150	104.002	104.002	16.6667	16.6667	24.0379	16.6667	16.6667	24.0379
H208	50	50	24.0379	16.6667	34.6675	16.6667	16.6667	150	16.6667	150	34.6675	34.6675	16.6667	16.6667	34.6675	16.6667	16.6667	16.6667	24.0379	34.6675	34.6675	16.6667	16.6667	16.6667	34.6675	216.341	34.6675	150	34.6675	150	24.0379	34.6675	24.0379	16.6667	16.6667	16.6667
N209	34.6675	216.341	50	216.341	150	24.0379	24.0379	16.6667	34.6675	24.0379	34.6675	16.6667	16.6667	24.0379	24.0379	16.6667	16.6667	50	34.6675	34.6675	24.0379	16.6667	24.0379	34.6675	72.1137	16.6667	16.6667	34.6675	24.0379	24.0379	24.0379	34.6675	50	16.6667	24.0379	16.6667
H210	34.6675	16.6667	16.6667	450	16.6667	24.0379	16.6667	24.0379	216.341	150	34.6675	16.6667	24.0379	50	34.6675	50	24.0375	16.6667	34.6675	34.6675	34.6675	16.6667	16.6667	16.6667	16.6667	16.6667	16.6667	150	150	104.002	50	24.0379	24.0379	50	16.6667	34.6675
N211	24.0379	24.0379	16.6667	72.1137	16.6667	24.0379	16.6667	24.0379	72.1137	16.6667	16.6667	24.0379	34.6675	50	16.6667	24.0379	16.6667	16.6667	16.6667	16.6667	16.6667	16.6667	16.6667	16.6667	24.0379	24.0379	16.6667	16.6667	16.6667	16.6667	16.6667	34.6675	24.0379	34.6675	24.0379	72.1137
H212	34.6675	34.6675	16.6667	104.002	50	24.0379	50	16.6667	50	24.0379	16.6667	16.6667	24.0379	104.002	50	16.6667	34.6681	34.6675	16.6667	16.6667	16.6667	72.1137	50	24.0379	34.6675	16.6667	16.6667	72.1137	24.0379	24.0379	50	50	34.6675	16.6667	24.0379	150
S213	24.0379	16.6667	16.6667	450	16.6667	50	16.6667	16.6667	104.002	72.1137	24.0379	16.6667	50	34.6675	24.0379	34.6675	16.6667	16.6667	450	24.0379	24.0379	16.6667	16.6667	216.341	16.6667	16.6667	34.6675	72.1137	72.1137	34.6675	24.0379	16.6667	24.0379	50	50	24.0379
H214	72.1137	24.0379	16.6667	50	50	24.0379	34.6675	16.6667	16.6667	312.007	104.002	24.0379	16.6667	50	24.0379	72.1137	16.6667	16.6667	104.002	104.002	72.1137	34.6675	34.6675	34.6675	16.6667	24.0379	24.0379	50	312.007	312.007	16.6667	34.6675	50	24.0379	16.6667	24.0379
S215	24.0379	16.6667	16.6667	16.6667	16.6667	24.0379	24.0379	50	16.6667	34.6675	50	34.6675	104.002	24.0379	72.1137	312.007	104.004	72.1137	50	24.0379	16.6667	24.0379	24.0379	16.6667	34.6675	34.6675	24.0379	34.6675	34.6675	24.0379	104.002	50	16.6667	16.6667	24.0379	50
S216	24.0379	16.6667	72.1137	312.007	16.6667	16.6667	16.6667	24.0379	312.007	24.0379	34.6675	16.6667	16.6667	16.6667	24.0379	72.1137	34.6681	24.0379	34.6675	104.002	34.6675	216.341	16.6667	34.6675	16.6667	16.6667	16.6667	24.0379	24.0379	24.0379	16.6667	16.6667	34.6675	72.1137	104.002	16.6667
H217	16.6667	16.6667	24.0379	72.1137	50	72.1137	72.1137	24.0379	24.0379	24.0379	24.0379	16.6667	72.1137	34.6675	50	72.1137	72.1125	24.0379	24.0379	24.0379	24.0379	72.1137	72.1137	104.002	16.6667	16.6667	16.6667	450	24.0379	24.0379	312.007	150	34.6675	104.002	450	72.1137
N218	104.002	24.0379	16.6667	72.1137	50	24.0379	24.0379	16.6667	34.6675	312.007	104.002	24.0379	16.6667	24.0379	50	50	24.0375	34.6675	104.002	104.002	104.002	104.002	150	24.0379	24.0379	24.0379	24.0379	16.6667	312.007	312.007	34.6675	16.6667	50	50	24.0379	34.6675
H219	72.1137	34.6675	16.6667	34.6675	50	50	24.0379	16.6667	34.6675	450	34.6675	24.0379	34.6675	72.1137	50	34.6675	16.6667	34.6675	34.6675	34.6675	16.6667	24.0379	24.0379	24.0379	16.6667	24.0379	24.0379	16.6667	450	450	34.6675	72.1137	24.0379	24.0379	16.6667	216.341
N220	34.6675	24.0379	16.6667	24.0379	16.6667	24.0379	24.0379	16.6667	24.0379	450	150	24.0379	16.6667	16.6667	34.6675	150	16.6667	34.6675	150	72.1137	104.002	24.0379	24.0379	24.0379	16.6667	24.0379	24.0379	150	450	450	24.0379	50	50	50	34.6675	34.6675
H221	50	24.0379	16.6667	50	50	24.0379	34.6675	16.6667	34.6675	450	50	34.6675	24.0379	24.0379	34.6675	34.6675	34.6681	34.6675	50	50	50	34.6675	34.6675	34.6675	24.0379	34.6675	34.6675	16.6667	450	450	50	34.6675	50	24.0379	50	104.002
S222	16.6667	24.0379	16.6667	24.0379	16.6667	16.6667	16.6667	50	24.0379	72.1137	16.6667	16.6667	16.6667	34.6675	150	16.6667	16.6667	72.1137	16.6667	72.1137	16.6667	16.6667	16.6667	16.6667	16.6667	16.6667	16.6667	72.1137	72.1137	24.0379	50	16.6667	104.002	24.0379	24.0379	34.6675
H223	24.0379	104.002	34.6675	312.007	216.341	216.341	16.6667	16.6667	34.6675	72.1137	50	16.6667	24.0379	34.6675	24.0379	16.6667	16.6667	24.0379	50	50	50	16.6667	50	24.0379	24.0379	16.6667	16.6667	24.0379	72.1137	72.1137	16.6667	16.6667	50	24.0379	50	50
S224	16.6667	16.6667	16.6667	24.0379	16.6667	16.6667	24.0379	72.1137	16.6667	104.002	16.6667	24.0379	24.0379	24.0379	216.341	16.6667	16.6667	150	16.6667	16.6667	16.6667	34.6675	24.0379	24.0379	24.0379	24.0379	16.6667	104.002	104.002	24.0379	50	34.6675	72.1137	72.1137	24.0379	72.1137
H225	24.0379	16.6667	16.6667	50	34.6675	50	216.341	24.0379	24.0379	34.6675	104.002	16.6667	72.1137	72.1137	24.0379	34.6675	50	24.0379	104.002	34.6675	34.6675	104.002	72.1137	216.341	24.0379	16.6667	16.6667	24.0379	34.6675	34.6675	450	104.002	24.0379	24.0379	150	24.0379
S226	16.6667	16.6667	16.6667	16.6667	16.6667	16.6667	24.0379	24.0379	72.1137	16.6667	16.6667	24.0379	34.6675	72.1137	34.6675	24.0379	16.6667	24.0379	16.6667	16.6667	16.6667	34.6675	72.1137	16.6667	24.0379	24.0379	16.6667	16.6667	16.6667	16.6667	16.6667	16.6667	50	16.6667	24.0379	16.6667
H227	16.6667	16.6667	16.6667	16.6667	16.6667	16.6667	16.6667	16.6667	16.6667	16.6667	16.6667	16.6667	16.6667	16.6667	16.6667	16.6667	16.6667	16.6667	16.6667	16.6667	16.6667	16.6667	16.6667	16.6667	16.6667	16.6667	16.6667	16.6667	16.6667	16.6667	16.6667	16.6667	16.6667	16.6667	16.6667	16.6667
S228	24.0379	16.6667	16.6667	216.341	16.6667	34.6675	16.6667	16.6667	150	50	24.0379	16.6667	16.6667	16.6667	16.6667	24.0379	16.6667	16.6667	24.0379	16.6667	72.1137	16.6667	16.6667	16.6667	16.6667	16.6667	16.6667	50	50	24.0379	34.6675	34.6675	16.6667	50	24.0379	16.6667
N229	16.6667	150	34.6675	16.6667	150	16.6667	34.6675	50	104.002	24.0379	16.6667	50	16.6667	24.0379	16.6667	16.6667	24.0375	34.6675	16.6667	16.6667	16.6667	34.6675	34.6675	24.0379	50	50	16.6667	24.0379	24.0379	16.6667	34.6675	34.6675	24.0379	16.6667	16.6667	24.0379
B230	16.6667	16.6667	16.6667	24.0379	16.6667	50	50	34.6675	16.6667	34.6675	50	16.6667	216.341	72.1137	450	72.1137	16.6667	24.0379	50	50	50	50	50	50	16.6667	16.6667	34.6675	34.6675	34.6675	16.6667	312.007	24.0379	16.6667	16.6667	450	104.002
H231	50	16.6667	72.1137	16.6667	24.0379	16.6667	34.6675	50	34.6675	16.6667	16.6667	34.6675	24.0379	50	24.0379	50	16.6667	50	450	16.6667	72.1137	34.6675	34.6675	34.6675	34.6675	450	34.6675	16.6667	16.6667	16.6667	16.6667	50	50	34.6675	24.0379	50
S232	16.6667	104.002	24.0379	16.6667	216.341	16.6667	16.6667	24.0379	104.002	72.1137	16.6667	34.6675	16.6667	34.6675	16.6667	16.6667	24.0375	16.6667	16.6667	16.6667	16.6667	16.6667	16.6667	16.6667	34.6675	34.6675	16.6667	72.1137	72.1137	16.6667	16.6667	50	24.0379	16.6667	16.6667	16.6667
N233	50	50	104.002	72.1137	24.0379	34.6675	216.341	312.007	50	16.6667	50	72.1137	72.1137	16.6667	16.6667	16.6667	450	24.0379	50	50	50	216.341	216.341	216.341	72.1137	216.341	72.1137	16.6667	16.6667	16.6667	24.0379	24.0379	450	312.007	104.002	450
S234	34.6675	16.6667	50	450	16.6667	24.0379	16.6667	24.0379	150	16.6667	50	16.6667	50	16.6667	50	216.341	34.6681	50	50	72.1137	50	16.6667	16.6667	16.6667	16.6667	16.6667	34.6675	16.6667	16.6667	16.6667	72.1137	50	34.6675	104.002	24.0379	24.0379
B235	16.6667	16.6667	16.6667	450	16.6667	72.1137	16.6667	16.6667	104.002	72.1137	24.0379	24.0379	16.6667	16.6667	34.6675	34.6675	16.6667	16.6667	24.0379	24.0379	16.6667	16.6667	16.6667	16.6667	24.0379	24.0379	16.6667	72.1137	72.1137	24.0379	16.6667	34.6675	34.6675	24.0379	34.6675	24.0379
N236	16.6667	450	72.1137	150	216.341	16.6667	24.0379	16.6667	24.0379	16.6667	450	24.0379	16.6667	16.6667	16.6667	50	16.6667	34.6675	450	450	50	24.0379	24.0379	24.0379	72.1137	24.0379	24.0379	16.6667	16.6667	16.6667	24.0379	34.6675	24.0379	24.0379	24.0379	16.6667
H237	24.0379	104.002	34.6675	312.007	216.341	150	16.6667	16.6667	34.6675	150	34.6675	16.6667	24.0379	16.6667	16.6667	24.0379	24.0375	16.6667	34.6675	34.6675	216.341	16.6667	34.6675	50	34.6675	16.6667	16.6667	24.0379	150	150	24.0379	16.6667	16.6667	24.0379	34.6675	24.0379
N238	34.6675	16.6667	16.6667	72.1137	50	16.6667	34.6675	16.6667	34.6675	50	104.002	16.6667	24.0379	34.6675	50	24.0379	16.6667	16.6667	104.002	104.002	16.6667	34.6675	34.6675	50	16.6667	16.6667	16.6667	24.0379	50	50	50	16.6667	50	50	16.6667	34.6675
B239	50	24.0379	50	16.6667	34.6675	24.0379	16.6667	24.0379	50	24.0379	16.6667	72.1137	24.0379	24.0379	34.6675	16.6667	34.6681	34.6675	16.6667	104.002	16.6667	16.6667	16.6667	16.6667	72.1137	150	72.1137	24.0379	72.1137	24.0379	34.6675	16.6667	16.6667	16.6667	16.6667	24.0379
H240	34.6675	72.1137	16.6667	50	24.0379	104.002	450	24.0379	16.6667	16.6667	24.0379	216.341	16.6667	34.6675	34.6675	450	50	216.341	24.0379	24.0379	24.0379	450	450	24.0379	216.341	16.6667	216.341	16.6667	50	16.6667	16.6667	16.6667	72.1137	16.6667	50	24.0379
S241	34.6675	24.0379	16.6667	104.002	50	24.0379	34.6675	16.6667	34.6675	24.0379	16.6667	16.6667	16.6667	150	50	24.0379	34.6681	34.6675	16.6667	16.6667	16.6667	34.6675	34.6675	16.6667	24.0379	16.6667	16.6667	16.6667	24.0379	24.0379	50	72.1137	24.0379	50	72.1137	150
N242	16.6667	150	16.6667	16.6667	150	16.6667	24.0379	24.0379	72.1137	50	16.6667	24.0379	16.6667	34.6675	24.0379	16.6667	16.6667	24.0379	16.6667	16.6667	16.6667	24.0379	24.0379	216.341	24.0379	24.0379	16.6667	50	50	16.6667	24.0379	34.6675	50	16.6667	34.6675	16.6667
S243	24.0379	24.0379	50	34.6675	16.6667	16.6667	34.6675	34.6675	16.6667	34.6675	16.6667	24.0379	104.002	16.6667	16.6667	34.6675	34.6681	16.6667	16.6667	34.6675	16.6667	34.6675	34.6675	34.6675	24.0379	24.0379	24.0379	34.6675	34.6675	34.6675	72.1137	34.6675	34.6675	24.0379	72.1137	16.6667
N244	16.6667	34.6675	16.6667	34.6675	24.0379	24.0379	104.002	34.6675	16.6667	34.6675	104.002	16.6667	104.002	50	16.6667	16.6667	24.0375	16.6667	104.002	104.002	16.6667	104.002	24.0379	104.002	72.1137	16.6667	16.6667	16.6667	34.6675	34.6675	104.002	50	16.6667	72.1137	24.0379	16.6667
S245	34.6675	16.6667	16.6667	34.6675	16.6667	34.6675	16.6667	16.6667	72.1137	16.6667	24.0379	16.6667	16.6667	16.6667	16.6667	16.6667	16.6667	16.6667	24.0379	24.0379	24.0379	16.6667	16.6667	16.6667	16.6667	16.6667	16.6667	16.6667	16.6667	72.1137	34.6675	24.0379	50	50	24.0379	24.0379
H246	16.6667	16.6667	72.1137	72.1137	216.341	16.6667	34.6675	16.6667	34.6675	16.6667	312.007	24.0379	24.0379	72.1137	16.6667	50	16.6667	24.0379	24.0379	312.007	24.0379	34.6675	50	16.6667	24.0379	24.0379	24.0379	24.0379	16.6667	16.6667	34.6675	50	34.6675	16.6667	16.6667	16.6667
S247	104.002	104.002	34.6675	24.0379	34.6675	16.6667	16.6667	50	16.6667	104.002	24.0379	34.6675	24.0379	34.6675	24.0379	16.6667	24.0375	16.6667	24.0379	16.6667	24.0379	16.6667	16.6667	16.6667	34.6675	16.6667	34.6675	104.002	24.0379	104.002	16.6667	16.6667	16.6667	34.6675	16.6667	34.6675
H248	50	150	24.0379	24.0379	104.002	34.6675	24.0379	24.0379	16.6667	216.341	50	24.0379	24.0379	24.0379	24.0379	16.6667	16.6667	16.6667	50	50	16.6667	24.0379	24.0379	24.0379	24.0379	24.0379	24.0379	24.0379	216.341	216.341	16.6667	16.6667	16.6667	16.6667	50	16.6667
S249	16.6667	16.6667	16.6667	16.6667	50	16.6667	16.6667	34.6675	72.1137	16.6667	24.0379	312.007	16.6667	16.6667	34.6675	16.6667	50	24.0379	24.0379	24.0379	24.0379	16.6667	16.6667	16.6667	312.007	50	312.007	16.6667	24.0379	16.6667	50	16.6667	16.6667	16.6667	16.6667	16.6667
B250	16.6667	16.6667	24.0379	24.0379	16.6667	34.6675	34.6675	50	16.6667	34.6675	50	24.0379	104.002	24.0379	104.002	216.341	72.1125	34.6675	50	24.0379	50	34.6675	24.0379	34.6675	24.0379	24.0379	24.0379	34.6675	34.6675	16.6667	150	16.6667	50	50	104.002	24.0379
N251	16.6667	16.6667	24.0379	24.0379	24.0379	16.6667	16.6667	150	16.6667	16.6667	24.0379	24.0379	34.6675	24.0379	16.6667	16.6667	50	34.6675	24.0379	24.0379	16.6667	16.6667	16.6667	16.6667	24.0379	34.6675	24.0379	16.6667	24.0379	16.6667	16.6667	16.6667	50	34.6675	50	34.6675
H252	16.6667	16.6667	16.6667	16.6667	16.6667	16.6667	16.6667	16.6667	16.6667	16.6667	16.6667	16.6667	16.6667	16.6667	16.6667	16.6667	16.6667	16.6667	16.6667	16.6667	16.6667	16.6667	16.6667	16.6667	16.6667	16.6667	16.6667	16.6667	16.6667	16.6667	16.6667	16.6667	16.6667	16.6667	16.6667	16.6667
N253	50	16.6667	24.0379	72.1137	72.1137	16.6667	150	16.6667	24.0379	24.0379	216.341	16.6667	34.6675	50	16.6667	24.0379	16.6667	16.6667	216.341	216.341	216.341	150	150	150	16.6667	16.6667	16.6667	34.6675	24.0379	24.0379	16.6667	24.0379	16.6667	16.6667	50	24.0379
H254	24.0379	150	50	216.341	150	104.002	16.6667	16.6667	34.6675	150	24.0379	24.0379	34.6675	16.6667	16.6667	24.0379	16.6667	16.6667	24.0379	24.0379	24.0379	16.6667	24.0379	34.6675	24.0379	24.0379	24.0379	50	150	150	16.6667	16.6667	16.6667	24.0379	24.0379	50
N255	50	34.6675	24.0379	16.6667	34.6675	16.6667	16.6667	34.6675	24.0379	216.341	50	16.6667	50	16.6667	16.6667	16.6667	34.6681	16.6667	50	104.002	24.0379	16.6667	16.6667	150	16.6667	104.002	16.6667	216.341	216.341	216.341	24.0379	34.6675	16.6667	16.6667	34.6675	24.0379
H256	72.1137	24.0379	16.6667	50	24.0379	24.0379	150	24.0379	16.6667	24.0379	16.6667	150	50	72.1137	104.002	104.002	16.6667	150	16.6667	16.6667	16.6667	150	150	150	34.6675	150	150	34.6675	24.0379	24.0379	16.6667	16.6667	150	24.0379	16.6667	34.6675
N257	34.6675	24.0379	16.6667	104.002	72.1137	72.1137	34.6675	16.6667	16.6667	24.0379	16.6667	16.6667	24.0379	216.341	104.002	24.0379	16.6667	34.6675	16.6667	216.341	104.002	34.6675	16.6667	34.6675	24.0379	16.6667	16.6667	16.6667	24.0379	24.0379	72.1137	16.6667	150	150	34.6675	216.341
H258	24.0379	72.1137	34.6675	24.0379	34.6675	16.6667	16.6667	50	16.6667	150	24.0379	34.6675	34.6675	72.1137	24.0379	16.6667	34.6681	16.6667	24.0379	24.0379	34.6675	34.6675	16.6667	16.6667	34.6675	72.1137	34.6675	150	24.0379	150	24.0379	16.6667	16.6667	16.6667	34.6675	24.0379
S259	50	16.6667	16.6667	16.6667	34.6675	16.6667	16.6667	50	34.6675	16.6667	16.6667	216.341	16.6667	16.6667	16.6667	50	50	312.007	16.6667	16.6667	34.6675	16.6667	16.6667	16.6667	216.341	50	216.341	16.6667	72.1137	16.6667	50	24.0379	16.6667	24.0379	16.6667	34.6675
H260	104.002	72.1137	24.0379	24.0379	24.0379	24.0379	16.6667	72.1137	24.0379	216.341	50	34.6675	34.6675	16.6667	16.6667	16.6667	16.6667	16.6667	50	50	50	16.6667	16.6667	34.6675	34.6675	72.1137	34.6675	216.341	24.0379	216.341	34.6675	34.6675	16.6667	24.0379	16.6667	24.0379
S261	16.6667	34.6675	216.341	34.6675	24.0379	34.6675	24.0379	72.1137	72.1137	16.6667	24.0379	16.6667	104.002	216.341	150	72.1137	450	104.002	24.0379	24.0379	24.0379	16.6667	24.0379	24.0379	16.6667	16.6667	16.6667	16.6667	16.6667	24.0379	72.1137	34.6675	24.0379	50	450	72.1137
N262	16.6667	16.6667	24.0379	24.0379	24.0379	16.6667	24.0379	50	16.6667	72.1137	16.6667	16.6667	34.6675	24.0379	150	34.6675	16.6667	72.1137	16.6667	16.6667	104.002	24.0379	24.0379	24.0379	16.6667	16.6667	24.0379	72.1137	72.1137	72.1137	16.6667	72.1137	34.6675	50	16.6667	16.6667
S263	24.0379	16.6667	16.6667	16.6667	16.6667	16.6667	34.6675	34.6675	104.002	16.6667	16.6667	16.6667	24.0379	72.1137	16.6667	24.0379	24.0375	24.0379	16.6667	16.6667	16.6667	34.6675	34.6675	34.6675	16.6667	16.6667	50	16.6667	16.6667	50	34.6675	24.0379	16.6667	24.0379	50	24.0379
S264	72.1137	16.6667	34.6675	24.0379	72.1137	24.0379	16.6667	34.6675	24.0379	50	150	24.0379	34.6675	50	16.6667	16.6667	34.6681	16.6667	150	24.0379	150	16.6667	16.6667	16.6667	50	24.0379	24.0379	150	50	50	16.6667	24.0379	50	50	16.6667	72.1137
H265	216.341	50	150	34.6675	24.0379	34.6675	312.007	72.1137	16.6667	50	72.1137	72.1137	16.6667	34.6675	16.6667	16.6667	312.013	34.6675	72.1137	72.1137	34.6675	312.007	24.0379	312.007	72.1137	150	72.1137	50	16.6667	50	50	16.6667	16.6667	450	34.6675	16.6667
N266	150	72.1137	24.0379	24.0379	24.0379	24.0379	16.6667	450	24.0379	216.341	34.6675	34.6675	24.0379	16.6667	16.6667	16.6667	16.6667	16.6667	34.6675	34.6675	34.6675	72.1137	16.6667	104.002	34.6675	16.6667	34.6675	216.341	24.0379	216.341	16.6667	50	16.6667	16.6667	16.6667	24.0379
B267	50	16.6667	34.6675	104.002	16.6667	24.0379	34.6675	24.0379	216.341	24.0379	34.6675	16.6667	16.6667	24.0379	24.0379	150	34.6681	34.6675	34.6675	50	34.6675	34.6675	24.0379	312.007	16.6667	16.6667	34.6675	24.0379	24.0379	24.0379	34.6675	50	16.6667	16.6667	24.0379	16.6667
S268	24.0379	34.6675	16.6667	16.6667	16.6667	24.0379	34.6675	34.6675	104.002	16.6667	16.6667	24.0379	34.6675	24.0379	16.6667	34.6675	24.0375	24.0379	16.6667	50	16.6667	34.6675	34.6675	34.6675	24.0379	24.0379	24.0379	16.6667	16.6667	16.6667	24.0379	16.6667	50	34.6675	16.6667	34.6675
B269	24.0379	16.6667	34.6675	16.6667	16.6667	24.0379	24.0379	16.6667	72.1137	50	16.6667	34.6675	16.6667	34.6675	16.6667	34.6675	16.6667	24.0379	16.6667	50	16.6667	24.0379	24.0379	24.0379	34.6675	34.6675	16.6667	50	50	50	50	34.6675	34.6675	34.6675	16.6667	16.6667
S270	216.341	16.6667	16.6667	24.0379	16.6667	34.6675	34.6675	24.0379	72.1137	34.6675	16.6667	24.0379	16.6667	24.0379	34.6675	24.0379	16.6667	16.6667	16.6667	16.6667	24.0379	34.6675	34.6675	50	24.0379	24.0379	24.0379	34.6675	34.6675	16.6667	16.6667	16.6667	34.6675	16.6667	16.6667	24.0379
H271	150	34.6675	24.0379	50	16.6667	24.0379	312.007	150	104.002	16.6667	50	150	50	50	24.0379	34.6675	216.337	24.0379	50	50	50	312.007	312.007	312.007	150	72.1137	150	16.6667	104.002	16.6667	16.6667	16.6667	104.002	104.002	104.002	104.002
S272	16.6667	16.6667	50	104.002	50	16.6667	450	16.6667	24.0379	24.0379	216.341	16.6667	24.0379	16.6667	16.6667	16.6667	16.6667	16.6667	16.6667	50	450	450	450	150	104.002	16.6667	16.6667	104.002	24.0379	24.0379	50	16.6667	34.6675	16.6667	72.1137	16.6667
N273	312.007	50	216.341	34.6675	34.6675	24.0379	450	16.6667	104.002	24.0379	72.1137	216.341	16.6667	16.6667	16.6667	16.6667	216.337	24.0379	72.1137	16.6667	72.1137	450	450	450	216.341	50	216.341	24.0379	24.0379	24.0379	34.6675	24.0379	16.6667	72.1137	50	16.6667
N274	34.6675	24.0379	24.0379	24.0379	72.1137	16.6667	34.6675	24.0379	16.6667	150	16.6667	24.0379	24.0379	24.0379	34.6675	16.6667	16.6667	16.6667	24.0379	16.6667	16.6667	34.6675	16.6667	104.002	50	24.0379	24.0379	16.6667	150	150	34.6675	16.6667	50	50	50	50
N275	216.341	34.6675	34.6675	34.6675	16.6667	24.0379	24.0379	50	16.6667	72.1137	50	34.6675	50	50	150	104.002	34.6681	16.6667	50	50	16.6667	24.0379	24.0379	16.6667	34.6675	312.007	34.6675	72.1137	24.0379	72.1137	34.6675	24.0379	16.6667	24.0379	216.341	24.0379
S276	50	24.0379	16.6667	16.6667	16.6667	50	24.0379	50	50	24.0379	50	16.6667	312.007	16.6667	72.1137	34.6675	34.6681	24.0379	50	16.6667	50	34.6675	24.0379	24.0379	16.6667	16.6667	24.0379	24.0379	24.0379	24.0379	312.007	216.341	16.6667	104.002	216.341	216.341
H277	150	50	34.6675	16.6667	16.6667	34.6675	24.0379	104.002	50	50	34.6675	72.1137	150	34.6675	24.0379	216.341	72.1125	50	34.6675	34.6675	312.007	24.0379	24.0379	16.6667	72.1137	72.1137	72.1137	50	34.6675	50	216.341	150	34.6675	72.1137	104.002	216.341
S278	16.6667	16.6667	34.6675	50	16.6667	16.6667	34.6675	34.6675	16.6667	16.6667	34.6675	34.6675	150	16.6667	72.1137	216.341	24.0375	50	34.6675	34.6675	34.6675	34.6675	16.6667	34.6675	34.6675	34.6675	34.6675	16.6667	16.6667	50	216.341	16.6667	34.6675	104.002	16.6667	72.1137
N279	16.6667	24.0379	16.6667	34.6675	34.6675	34.6675	104.002	34.6675	34.6675	34.6675	216.341	24.0379	450	34.6675	50	50	50	24.0379	216.341	216.341	16.6667	104.002	104.002	104.002	16.6667	24.0379	24.0379	34.6675	34.6675	34.6675	312.007	72.1137	24.0379	24.0379	104.002	34.6675
S280	16.6667	24.0379	16.6667	16.6667	16.6667	72.1137	34.6675	24.0379	24.0379	16.6667	16.6667	72.1137	24.0379	24.0379	50	312.007	24.0375	150	16.6667	16.6667	16.6667	34.6675	16.6667	34.6675	72.1137	216.341	72.1137	16.6667	16.6667	16.6667	16.6667	34.6675	24.0379	24.0379	16.6667	16.6667
H281	16.6667	16.6667	16.6667	16.6667	16.6667	16.6667	16.6667	16.6667	16.6667	16.6667	16.6667	16.6667	16.6667	16.6667	16.6667	16.6667	16.6667	16.6667	16.6667	16.6667	16.6667	16.6667	16.6667	16.6667	16.6667	16.6667	16.6667	16.6667	16.6667	16.6667	16.6667	16.6667	16.6667	16.6667	16.6667	16.6667
N282	16.6667	50	34.6675	24.0379	24.0379	16.6667	24.0379	216.341	16.6667	16.6667	16.6667	34.6675	16.6667	24.0379	24.0379	24.0379	34.6681	16.6667	16.6667	50	16.6667	24.0379	24.0379	50	34.6675	50	34.6675	16.6667	216.341	16.6667	16.6667	16.6667	16.6667	24.0379	16.6667	16.6667
N283	16.6667	104.002	24.0379	50	104.002	24.0379	24.0379	72.1137	216.341	24.0379	16.6667	34.6675	24.0379	34.6675	24.0379	16.6667	16.6667	24.0379	16.6667	16.6667	16.6667	24.0379	24.0379	24.0379	34.6675	34.6675	24.0379	24.0379	24.0379	16.6667	50	34.6675	24.0379	34.6675	24.0379	16.6667
S284	16.6667	24.0379	16.6667	16.6667	16.6667	16.6667	24.0379	72.1137	16.6667	24.0379	24.0379	50	34.6675	16.6667	216.341	16.6667	34.6681	72.1137	16.6667	24.0379	50	24.0379	24.0379	34.6675	50	50	16.6667	24.0379	24.0379	24.0379	50	16.6667	104.002	16.6667	16.6667	24.0379
H285	24.0379	24.0379	72.1137	16.6667	24.0379	24.0379	50	34.6675	34.6675	24.0379	16.6667	50	34.6675	16.6667	24.0379	16.6667	50	34.6675	16.6667	16.6667	24.0379	50	50	50	50	150	50	24.0379	104.002	24.0379	24.0379	16.6667	34.6675	16.6667	16.6667	34.6675
N286	24.0379	72.1137	72.1137	216.341	150	24.0379	24.0379	16.6667	34.6675	72.1137	24.0379	16.6667	34.6675	16.6667	16.6667	34.6675	24.0375	34.6675	34.6675	24.0379	24.0379	24.0379	150	104.002	24.0379	16.6667	16.6667	34.6675	72.1137	72.1137	24.0379	34.6675	34.6675	16.6667	16.6667	16.6667
H287	50	24.0379	150	50	50	104.002	150	150	72.1137	150	34.6675	50	104.002	16.6667	34.6675	104.002	24.0375	104.002	34.6675	16.6667	450	150	150	16.6667	50	34.6675	50	150	34.6675	150	16.6667	16.6667	312.007	104.002	24.0379	34.6675
N288	16.6667	16.6667	34.6675	24.0379	24.0379	16.6667	24.0379	216.341	16.6667	16.6667	24.0379	50	34.6675	16.6667	16.6667	16.6667	16.6667	34.6675	24.0379	24.0379	24.0379	24.0379	24.0379	24.0379	50	450	50	16.6667	72.1137	16.6667	24.0379	34.6675	72.1137	16.6667	34.6675	16.6667
S289	50	16.6667	16.6667	16.6667	34.6675	16.6667	50	24.0379	34.6675	16.6667	24.0379	24.0379	34.6675	16.6667	34.6675	16.6667	34.6681	312.007	24.0379	24.0379	50	50	50	50	24.0379	104.002	24.0379	16.6667	72.1137	16.6667	24.0379	24.0379	24.0379	34.6675	50	50
H290	16.6667	34.6675	16.6667	312.007	50	72.1137	150	16.6667	16.6667	16.6667	24.0379	16.6667	50	104.002	104.002	34.6675	16.6667	24.0379	24.0379	24.0379	312.007	150	150	150	24.0379	16.6667	16.6667	72.1137	16.6667	16.6667	72.1137	16.6667	16.6667	150	104.002	72.1137
S291	34.6675	16.6667	24.0379	34.6675	72.1137	16.6667	50	16.6667	50	16.6667	104.002	24.0379	16.6667	16.6667	16.6667	34.6675	24.0375	24.0379	104.002	16.6667	24.0379	50	50	50	24.0379	24.0379	24.0379	50	16.6667	16.6667	34.6675	24.0379	24.0379	16.6667	50	72.1137
H292	104.002	50	216.341	24.0379	50	24.0379	50	50	34.6675	216.341	72.1137	216.341	312.007	24.0379	104.002	104.002	50	24.0379	72.1137	72.1137	216.341	50	50	50	216.341	312.007	216.341	216.341	16.6667	216.341	24.0379	104.002	72.1137	24.0379	16.6667	24.0379
S293	16.6667	72.1137	34.6675	24.0379	24.0379	16.6667	24.0379	72.1137	16.6667	24.0379	16.6667	16.6667	24.0379	72.1137	104.002	24.0379	16.6667	50	16.6667	216.341	34.6675	24.0379	24.0379	50	16.6667	16.6667	34.6675	24.0379	24.0379	50	16.6667	16.6667	16.6667	16.6667	16.6667	24.0379
H294	16.6667	24.0379	16.6667	16.6667	24.0379	16.6667	34.6675	216.341	16.6667	50	16.6667	24.0379	16.6667	24.0379	216.341	34.6675	24.0375	72.1137	16.6667	16.6667	24.0379	34.6675	50	34.6675	24.0379	24.0379	16.6667	50	50	24.0379	34.6675	50	24.0379	72.1137	50	16.6667
B295	50	24.0379	16.6667	16.6667	24.0379	16.6667	216.341	104.002	34.6675	24.0379	16.6667	312.007	16.6667	16.6667	16.6667	34.6675	16.6667	50	16.6667	24.0379	16.6667	216.341	216.341	150	312.007	16.6667	312.007	24.0379	150	24.0379	34.6675	16.6667	24.0379	34.6675	50	16.6667
N296	34.6675	16.6667	24.0379	50	72.1137	16.6667	312.007	16.6667	24.0379	50	216.341	24.0379	16.6667	24.0379	16.6667	24.0379	34.6681	16.6667	16.6667	16.6667	216.341	312.007	312.007	312.007	50	24.0379	24.0379	50	50	50	34.6675	24.0379	16.6667	16.6667	34.6675	34.6675
S297	104.002	16.6667	16.6667	34.6675	24.0379	16.6667	104.002	24.0379	24.0379	24.0379	34.6675	24.0379	16.6667	16.6667	16.6667	16.6667	24.0375	312.007	34.6675	34.6675	72.1137	34.6675	104.002	104.002	24.0379	34.6675	24.0379	24.0379	50	24.0379	24.0379	34.6675	50	50	34.6675	24.0379
H298	450	50	16.6667	34.6675	24.0379	50	450	24.0379	16.6667	24.0379	24.0379	104.002	50	72.1137	16.6667	72.1137	72.1125	104.002	24.0379	104.002	34.6675	450	16.6667	24.0379	104.002	216.341	104.002	24.0379	104.002	24.0379	34.6675	16.6667	16.6667	24.0379	16.6667	16.6667
B299	450	16.6667	16.6667	24.0379	16.6667	34.6675	34.6675	24.0379	312.007	34.6675	16.6667	34.6675	24.0379	16.6667	16.6667	16.6667	24.0375	16.6667	16.6667	16.6667	16.6667	34.6675	34.6675	34.6675	34.6675	34.6675	24.0379	34.6675	34.6675	24.0379	24.0379	50	16.6667	34.6675	16.6667	16.6667
B300	450	50	24.0379	34.6675	50	24.0379	16.6667	34.6675	216.341	16.6667	24.0379	50	50	72.1137	34.6675	16.6667	50	16.6667	24.0379	24.0379	24.0379	16.6667	24.0379	104.002	50	50	24.0379	16.6667	16.6667	50	50	72.1137	16.6667	72.1137	24.0379	72.1137
S301	34.6675	16.6667	34.6675	16.6667	72.1137	16.6667	34.6675	34.6675	16.6667	50	104.002	34.6675	72.1137	16.6667	16.6667	24.0379	24.0375	16.6667	104.002	16.6667	34.6675	34.6675	34.6675	104.002	16.6667	34.6675	34.6675	50	50	50	16.6667	16.6667	34.6675	16.6667	16.6667	24.0379
H302	72.1137	216.341	24.0379	24.0379	24.0379	34.6675	34.6675	104.002	24.0379	50	24.0379	72.1137	450	16.6667	24.0379	150	16.6667	50	16.6667	24.0379	24.0379	24.0379	34.6675	34.6675	72.1137	72.1137	72.1137	50	104.002	50	312.007	104.002	104.002	150	72.1137	312.007
S303	24.0379	216.341	104.002	16.6667	24.0379	24.0379	150	104.002	50	24.0379	24.0379	34.6675	450	150	312.007	216.341	72.1125	50	24.0379	24.0379	24.0379	150	150	16.6667	34.6675	34.6675	24.0379	24.0379	24.0379	16.6667	216.341	104.002	72.1137	34.6675	72.1137	24.0379
H304	50	16.6667	16.6667	104.002	16.6667	24.0379	24.0379	24.0379	150	104.002	34.6675	24.0379	50	16.6667	16.6667	50	16.6667	16.6667	34.6675	34.6675	34.6675	24.0379	24.0379	24.0379	24.0379	24.0379	50	104.002	104.002	72.1137	50	34.6675	50	16.6667	24.0379	24.0379
S305	24.0379	16.6667	24.0379	16.6667	16.6667	16.6667	24.0379	24.0379	72.1137	16.6667	16.6667	24.0379	24.0379	16.6667	34.6675	16.6667	16.6667	24.0379	16.6667	16.6667	312.007	24.0379	24.0379	24.0379	24.0379	24.0379	24.0379	16.6667	16.6667	16.6667	16.6667	24.0379	34.6675	16.6667	34.6675	16.6667
H306	16.6667	16.6667	16.6667	16.6667	16.6667	16.6667	16.6667	16.6667	16.6667	16.6667	16.6667	16.6667	16.6667	16.6667	16.6667	16.6667	16.6667	16.6667	16.6667	16.6667	16.6667	16.6667	16.6667	16.6667	16.6667	16.6667	16.6667	16.6667	16.6667	16.6667	16.6667	16.6667	16.6667	16.6667	16.6667	16.6667
S307	34.6675	24.0379	50	150	104.002	34.6675	16.6667	16.6667	24.0379	16.6667	50	24.0379	34.6675	16.6667	34.6675	34.6675	16.6667	50	50	50	16.6667	16.6667	16.6667	16.6667	16.6667	24.0379	24.0379	24.0379	16.6667	16.6667	24.0379	16.6667	34.6675	34.6675	34.6675	24.0379
N308	24.0379	24.0379	16.6667	450	16.6667	34.6675	16.6667	34.6675	150	16.6667	16.6667	24.0379	24.0379	50	34.6675	16.6667	16.6667	16.6667	16.6667	16.6667	50	16.6667	16.6667	16.6667	24.0379	24.0379	24.0379	16.6667	16.6667	24.0379	24.0379	24.0379	24.0379	34.6675	34.6675	16.6667
N309	50	24.0379	16.6667	72.1137	72.1137	16.6667	34.6675	16.6667	34.6675	24.0379	450	16.6667	16.6667	50	16.6667	50	34.6681	16.6667	450	16.6667	450	34.6675	34.6675	34.6675	34.6675	16.6667	16.6667	24.0379	24.0379	24.0379	16.6667	50	16.6667	16.6667	50	50
H310	34.6675	34.6675	34.6675	16.6667	24.0379	34.6675	104.002	72.1137	24.0379	72.1137	16.6667	16.6667	24.0379	312.007	216.341	72.1137	34.6681	34.6675	16.6667	16.6667	16.6667	72.1137	24.0379	104.002	16.6667	16.6667	24.0379	72.1137	72.1137	34.6675	34.6675	150	312.007	104.002	16.6667	104.002
S311	34.6675	312.007	72.1137	216.341	104.002	24.0379	24.0379	16.6667	50	50	24.0379	16.6667	34.6675	34.6675	16.6667	34.6675	16.6667	34.6675	24.0379	150	16.6667	16.6667	24.0379	24.0379	16.6667	16.6667	16.6667	24.0379	50	50	16.6667	16.6667	24.0379	16.6667	16.6667	24.0379
S312	50	16.6667	16.6667	150	16.6667	34.6675	16.6667	16.6667	72.1137	34.6675	24.0379	16.6667	16.6667	50	16.6667	24.0379	16.6667	16.6667	24.0379	24.0379	24.0379	16.6667	16.6667	16.6667	16.6667	16.6667	34.6675	34.6675	34.6675	16.6667	16.6667	34.6675	34.6675	24.0379	24.0379	24.0379
H313	104.002	34.6675	72.1137	50	34.6675	34.6675	34.6675	50	72.1137	24.0379	24.0379	50	450	216.341	72.1137	16.6667	72.1125	34.6675	24.0379	24.0379	24.0379	34.6675	34.6675	34.6675	50	50	24.0379	24.0379	24.0379	16.6667	450	72.1137	450	104.002	450	450
S314	72.1137	104.002	34.6675	24.0379	24.0379	16.6667	16.6667	72.1137	24.0379	16.6667	16.6667	24.0379	34.6675	24.0379	34.6675	16.6667	24.0375	24.0379	312.007	24.0379	24.0379	16.6667	34.6675	72.1137	24.0379	24.0379	16.6667	16.6667	16.6667	16.6667	16.6667	24.0379	24.0379	24.0379	50	24.0379
H315	72.1137	24.0379	16.6667	34.6675	50	34.6675	34.6675	16.6667	24.0379	312.007	72.1137	34.6675	24.0379	16.6667	72.1137	104.002	34.6681	34.6675	72.1137	72.1137	50	34.6675	34.6675	16.6667	34.6675	34.6675	34.6675	24.0379	312.007	312.007	50	34.6675	72.1137	16.6667	16.6667	50
S316	16.6667	16.6667	16.6667	50	16.6667	24.0379	16.6667	24.0379	312.007	24.0379	34.6675	16.6667	72.1137	16.6667	50	50	34.6681	24.0379	34.6675	34.6675	16.6667	16.6667	16.6667	16.6667	16.6667	16.6667	16.6667	24.0379	24.0379	24.0379	16.6667	72.1137	16.6667	104.002	150	34.6675
H317	34.6675	16.6667	50	150	150	24.0379	16.6667	16.6667	34.6675	16.6667	24.0379	16.6667	34.6675	50	24.0379	16.6667	16.6667	312.007	24.0379	16.6667	24.0379	16.6667	16.6667	16.6667	16.6667	16.6667	16.6667	16.6667	16.6667	16.6667	24.0379	16.6667	34.6675	16.6667	34.6675	24.0379
S318	16.6667	24.0379	34.6675	24.0379	50	16.6667	16.6667	104.002	16.6667	16.6667	24.0379	24.0379	16.6667	34.6675	16.6667	24.0379	34.6681	16.6667	24.0379	24.0379	34.6675	16.6667	16.6667	16.6667	24.0379	72.1137	24.0379	16.6667	50	16.6667	24.0379	24.0379	16.6667	24.0379	24.0379	16.6667
H319	72.1137	72.1137	16.6667	34.6675	34.6675	104.002	312.007	24.0379	34.6675	24.0379	16.6667	104.002	50	24.0379	104.002	450	34.6681	150	16.6667	16.6667	16.6667	312.007	24.0379	312.007	72.1137	104.002	104.002	34.6675	24.0379	24.0379	24.0379	104.002	450	24.0379	16.6667	16.6667
B320	34.6675	16.6667	50	16.6667	16.6667	450	34.6675	16.6667	72.1137	72.1137	16.6667	16.6667	24.0379	24.0379	16.6667	50	16.6667	16.6667	16.6667	16.6667	72.1137	34.6675	34.6675	34.6675	16.6667	16.6667	34.6675	72.1137	72.1137	16.6667	16.6667	24.0379	16.6667	34.6675	16.6667	16.6667
H321	24.0379	16.6667	16.6667	34.6675	16.6667	24.0379	50	24.0379	24.0379	16.6667	34.6675	50	24.0379	16.6667	24.0379	72.1137	34.6681	104.002	34.6675	24.0379	72.1137	50	24.0379	50	50	216.341	50	16.6667	72.1137	16.6667	24.0379	16.6667	16.6667	16.6667	50	72.1137
S322	72.1137	16.6667	34.6675	16.6667	24.0379	16.6667	50	216.341	34.6675	16.6667	16.6667	216.341	16.6667	50	16.6667	50	50	50	16.6667	16.6667	16.6667	50	50	16.6667	216.341	72.1137	216.341	16.6667	24.0379	16.6667	34.6675	24.0379	24.0379	34.6675	50	16.6667
H323	216.341	16.6667	16.6667	34.6675	16.6667	24.0379	34.6675	24.0379	216.341	16.6667	24.0379	50	50	34.6675	34.6675	16.6667	24.0375	24.0379	24.0379	34.6675	24.0379	34.6675	34.6675	24.0379	50	50	34.6675	16.6667	16.6667	16.6667	34.6675	16.6667	50	72.1137	24.0379	34.6675
S324	312.007	24.0379	16.6667	24.0379	16.6667	34.6675	34.6675	24.0379	72.1137	34.6675	16.6667	24.0379	34.6675	24.0379	16.6667	24.0379	16.6667	16.6667	16.6667	16.6667	24.0379	34.6675	34.6675	34.6675	24.0379	24.0379	16.6667	34.6675	34.6675	16.6667	34.6675	50	34.6675	24.0379	34.6675	16.6667
H325	24.0379	16.6667	72.1137	34.6675	16.6667	24.0379	34.6675	50	16.6667	24.0379	50	16.6667	450	16.6667	104.002	150	24.0375	34.6675	50	50	16.6667	34.6675	34.6675	34.6675	16.6667	16.6667	34.6675	24.0379	24.0379	24.0379	216.341	50	50	72.1137	104.002	16.6667
S326	24.0379	16.6667	50	16.6667	16.6667	16.6667	34.6675	34.6675	16.6667	16.6667	34.6675	50	72.1137	34.6675	24.0379	104.002	16.6667	150	34.6675	16.6667	34.6675	34.6675	72.1137	34.6675	50	50	24.0379	16.6667	16.6667	34.6675	216.341	24.0379	34.6675	104.002	72.1137	72.1137
H327	16.6667	34.6675	24.0379	24.0379	24.0379	72.1137	24.0379	50	150	16.6667	16.6667	50	50	24.0379	50	450	50	24.0379	16.6667	50	16.6667	34.6675	24.0379	24.0379	50	50	16.6667	16.6667	16.6667	16.6667	34.6675	104.002	450	104.002	16.6667	104.002
S328	16.6667	216.341	34.6675	104.002	50	50	72.1137	16.6667	16.6667	16.6667	16.6667	16.6667	16.6667	34.6675	312.007	72.1137	72.1125	24.0379	16.6667	16.6667	312.007	72.1137	72.1137	72.1137	34.6675	16.6667	16.6667	450	16.6667	16.6667	312.007	104.002	72.1137	150	450	24.0379
H329	24.0379	50	24.0379	24.0379	150	16.6667	50	16.6667	16.6667	150	150	24.0379	16.6667	50	24.0379	16.6667	16.6667	16.6667	150	150	34.6675	50	50	24.0379	24.0379	24.0379	24.0379	16.6667	150	150	34.6675	24.0379	16.6667	16.6667	16.6667	16.6667
N330	16.6667	16.6667	34.6675	104.002	34.6675	24.0379	104.002	16.6667	24.0379	24.0379	216.341	16.6667	24.0379	16.6667	24.0379	34.6675	50	16.6667	216.341	216.341	216.341	104.002	16.6667	104.002	16.6667	16.6667	16.6667	50	24.0379	24.0379	50	50	16.6667	50	16.6667	24.0379
H331	104.002	24.0379	16.6667	34.6675	50	24.0379	24.0379	16.6667	24.0379	450	104.002	24.0379	16.6667	16.6667	50	150	34.6681	34.6675	104.002	104.002	34.6675	24.0379	24.0379	24.0379	16.6667	24.0379	24.0379	24.0379	450	450	16.6667	24.0379	16.6667	50	50	24.0379
S332	16.6667	24.0379	24.0379	72.1137	34.6675	16.6667	150	16.6667	24.0379	24.0379	312.007	16.6667	34.6675	16.6667	50	16.6667	24.0375	16.6667	312.007	312.007	16.6667	150	150	150	34.6675	16.6667	16.6667	24.0379	24.0379	24.0379	50	16.6667	16.6667	34.6675	72.1137	50
H333	50	34.6675	16.6667	16.6667	16.6667	24.0379	34.6675	34.6675	150	34.6675	16.6667	34.6675	24.0379	34.6675	16.6667	24.0379	24.0375	24.0379	16.6667	34.6675	16.6667	24.0379	34.6675	24.0379	34.6675	34.6675	16.6667	34.6675	34.6675	24.0379	34.6675	34.6675	72.1137	16.6667	16.6667	34.6675
S334	24.0379	104.002	34.6675	216.341	450	24.0379	16.6667	16.6667	34.6675	16.6667	216.341	34.6675	24.0379	72.1137	16.6667	24.0379	16.6667	24.0379	216.341	216.341	24.0379	16.6667	16.6667	16.6667	24.0379	34.6675	34.6675	34.6675	16.6667	16.6667	16.6667	24.0379	16.6667	16.6667	34.6675	50
H335	72.1137	50	24.0379	24.0379	34.6675	50	72.1137	104.002	16.6667	72.1137	72.1137	104.002	50	16.6667	24.0379	104.002	312.013	50	72.1137	72.1137	34.6675	72.1137	72.1137	72.1137	104.002	34.6675	104.002	72.1137	50	72.1137	24.0379	16.6667	34.6675	104.002	24.0379	34.6675
H336	50	104.002	450	150	72.1137	72.1137	312.007	34.6675	24.0379	24.0379	24.0379	104.002	104.002	216.341	34.6675	24.0379	150	72.1137	104.002	24.0379	16.6667	312.007	312.007	24.0379	50	104.002	104.002	50	24.0379	24.0379	104.002	104.002	16.6667	72.1137	72.1137	50
S337	24.0379	16.6667	24.0379	24.0379	34.6675	16.6667	50	16.6667	24.0379	72.1137	450	24.0379	16.6667	24.0379	24.0379	24.0379	16.6667	24.0379	450	450	450	24.0379	24.0379	50	104.002	24.0379	24.0379	16.6667	72.1137	72.1137	34.6675	16.6667	34.6675	50	50	72.1137
B338	34.6675	16.6667	34.6675	24.0379	104.002	16.6667	34.6675	24.0379	16.6667	72.1137	16.6667	34.6675	50	34.6675	16.6667	16.6667	34.6681	16.6667	312.007	16.6667	24.0379	34.6675	50	34.6675	34.6675	34.6675	34.6675	50	72.1137	72.1137	24.0379	16.6667	16.6667	16.6667	34.6675	16.6667
N339	24.0379	16.6667	16.6667	16.6667	16.6667	16.6667	34.6675	50	104.002	34.6675	16.6667	16.6667	24.0379	72.1137	34.6675	16.6667	16.6667	24.0379	16.6667	16.6667	16.6667	16.6667	34.6675	24.0379	16.6667	16.6667	16.6667	34.6675	34.6675	104.002	34.6675	50	50	16.6667	34.6675	24.0379
H340	16.6667	312.007	34.6675	24.0379	24.0379	16.6667	34.6675	72.1137	16.6667	16.6667	16.6667	34.6675	16.6667	50	72.1137	24.0379	16.6667	16.6667	16.6667	50	16.6667	34.6675	34.6675	104.002	34.6675	34.6675	16.6667	16.6667	16.6667	16.6667	16.6667	24.0379	24.0379	16.6667	16.6667	24.0379
S341	24.0379	24.0379	72.1137	16.6667	24.0379	24.0379	16.6667	24.0379	34.6675	16.6667	16.6667	16.6667	16.6667	16.6667	16.6667	16.6667	16.6667	34.6675	16.6667	16.6667	34.6675	34.6675	16.6667	16.6667	16.6667	16.6667	16.6667	16.6667	72.1137	16.6667	34.6675	50	16.6667	16.6667	16.6667	72.1137
H342	24.0379	16.6667	16.6667	16.6667	24.0379	72.1137	104.002	104.002	16.6667	34.6675	72.1137	72.1137	16.6667	34.6675	16.6667	312.007	72.1125	72.1137	72.1137	72.1137	72.1137	104.002	104.002	104.002	72.1137	72.1137	72.1137	34.6675	24.0379	34.6675	34.6675	24.0379	16.6667	16.6667	16.6667	16.6667
S343	16.6667	16.6667	24.0379	72.1137	16.6667	16.6667	312.007	16.6667	24.0379	50	216.341	16.6667	50	50	34.6675	34.6675	16.6667	16.6667	216.341	216.341	104.002	312.007	312.007	312.007	24.0379	16.6667	16.6667	50	50	50	24.0379	50	24.0379	16.6667	24.0379	24.0379
H344	150	50	34.6675	34.6675	34.6675	24.0379	450	24.0379	34.6675	24.0379	50	104.002	72.1137	216.341	16.6667	34.6675	72.1125	50	34.6675	50	50	450	34.6675	450	104.002	50	104.002	24.0379	24.0379	24.0379	16.6667	104.002	50	34.6675	24.0379	16.6667
S345	216.341	34.6675	16.6667	34.6675	34.6675	50	450	24.0379	24.0379	24.0379	16.6667	104.002	72.1137	104.002	50	72.1137	50	104.002	16.6667	16.6667	16.6667	450	450	450	104.002	34.6675	104.002	24.0379	72.1137	24.0379	16.6667	104.002	72.1137	16.6667	34.6675	24.0379
H346	312.007	34.6675	450	34.6675	24.0379	50	312.007	34.6675	34.6675	16.6667	72.1137	50	50	104.002	24.0379	34.6675	72.1125	450	72.1137	72.1137	50	312.007	312.007	24.0379	50	72.1137	50	16.6667	24.0379	16.6667	16.6667	50	72.1137	16.6667	104.002	24.0379
N347	50	34.6675	24.0379	50	312.007	16.6667	104.002	16.6667	16.6667	16.6667	216.341	34.6675	16.6667	34.6675	24.0379	16.6667	16.6667	16.6667	104.002	216.341	216.341	104.002	104.002	150	24.0379	34.6675	34.6675	450	16.6667	16.6667	34.6675	16.6667	16.6667	24.0379	16.6667	72.1137
H348	450	34.6675	16.6667	16.6667	24.0379	50	34.6675	50	72.1137	16.6667	50	34.6675	216.341	104.002	50	16.6667	50	24.0379	50	34.6675	50	34.6675	34.6675	16.6667	34.6675	34.6675	16.6667	16.6667	16.6667	24.0379	216.341	150	72.1137	104.002	216.341	312.007
S349	24.0379	16.6667	16.6667	16.6667	24.0379	24.0379	16.6667	24.0379	16.6667	34.6675	50	34.6675	72.1137	16.6667	16.6667	312.007	150	72.1137	16.6667	50	34.6675	16.6667	72.1137	34.6675	34.6675	104.002	34.6675	34.6675	150	34.6675	72.1137	34.6675	50	16.6667	24.0379	16.6667
N350	24.0379	24.0379	34.6675	34.6675	24.0379	34.6675	150	50	50	16.6667	16.6667	16.6667	50	450	312.007	312.007	16.6667	24.0379	16.6667	16.6667	24.0379	150	104.002	72.1137	16.6667	16.6667	50	16.6667	16.6667	72.1137	104.002	450	104.002	216.341	72.1137	312.007
N351	72.1137	50	216.341	24.0379	16.6667	24.0379	24.0379	72.1137	72.1137	50	34.6675	72.1137	150	72.1137	16.6667	312.007	104.004	72.1137	34.6675	34.6675	16.6667	24.0379	16.6667	24.0379	72.1137	72.1137	72.1137	50	16.6667	50	104.002	216.341	72.1137	50	450	104.002
H352	72.1137	24.0379	24.0379	34.6675	16.6667	24.0379	150	16.6667	72.1137	312.007	16.6667	150	312.007	16.6667	104.002	150	216.337	72.1137	16.6667	16.6667	150	150	34.6675	24.0379	150	34.6675	150	312.007	150	312.007	104.002	216.341	72.1137	216.341	312.007	104.002
S353	16.6667	16.6667	16.6667	16.6667	16.6667	16.6667	16.6667	104.002	34.6675	16.6667	50	312.007	24.0379	34.6675	16.6667	16.6667	72.1125	24.0379	50	50	72.1137	16.6667	16.6667	16.6667	312.007	34.6675	312.007	16.6667	72.1137	16.6667	16.6667	16.6667	24.0379	16.6667	34.6675	24.0379
H354	312.007	50	216.341	34.6675	16.6667	34.6675	34.6675	72.1137	24.0379	50	50	150	72.1137	50	150	72.1137	16.6667	24.0379	24.0379	50	50	34.6675	34.6675	16.6667	150	34.6675	150	50	34.6675	50	34.6675	104.002	16.6667	24.0379	24.0379	50
S355	16.6667	104.002	16.6667	16.6667	450	16.6667	16.6667	24.0379	72.1137	34.6675	16.6667	16.6667	34.6675	24.0379	34.6675	16.6667	16.6667	24.0379	16.6667	16.6667	16.6667	16.6667	16.6667	50	16.6667	16.6667	50	34.6675	34.6675	16.6667	16.6667	34.6675	34.6675	34.6675	34.6675	24.0379
H356	16.6667	34.6675	72.1137	16.6667	24.0379	16.6667	24.0379	72.1137	16.6667	72.1137	16.6667	16.6667	24.0379	16.6667	216.341	24.0379	16.6667	34.6675	16.6667	16.6667	16.6667	24.0379	24.0379	24.0379	16.6667	16.6667	16.6667	72.1137	72.1137	50	24.0379	16.6667	72.1137	50	16.6667	16.6667
N357	24.0379	34.6675	24.0379	16.6667	24.0379	16.6667	16.6667	450	16.6667	150	34.6675	34.6675	34.6675	24.0379	24.0379	16.6667	16.6667	24.0379	24.0379	34.6675	216.341	16.6667	16.6667	16.6667	34.6675	312.007	34.6675	150	24.0379	150	16.6667	16.6667	16.6667	34.6675	50	16.6667
H358	34.6675	16.6667	34.6675	150	104.002	104.002	16.6667	16.6667	24.0379	216.341	34.6675	34.6675	24.0379	16.6667	24.0379	24.0379	24.0375	34.6675	34.6675	34.6675	34.6675	16.6667	16.6667	16.6667	104.002	34.6675	34.6675	24.0379	216.341	216.341	34.6675	16.6667	16.6667	16.6667	34.6675	16.6667
S359	16.6667	50	16.6667	24.0379	24.0379	24.0379	34.6675	34.6675	104.002	24.0379	24.0379	16.6667	312.007	16.6667	34.6675	16.6667	16.6667	16.6667	24.0379	24.0379	16.6667	34.6675	34.6675	34.6675	16.6667	16.6667	16.6667	16.6667	24.0379	24.0379	450	16.6667	16.6667	72.1137	50	34.6675
B360	24.0379	16.6667	50	16.6667	16.6667	16.6667	34.6675	34.6675	16.6667	24.0379	34.6675	34.6675	150	72.1137	34.6675	104.002	72.1125	216.341	34.6675	34.6675	34.6675	16.6667	312.007	24.0379	34.6675	34.6675	16.6667	24.0379	24.0379	34.6675	150	34.6675	34.6675	72.1137	72.1137	16.6667
H361	34.6675	50	104.002	50	34.6675	34.6675	216.341	104.002	16.6667	104.002	72.1137	72.1137	50	24.0379	50	50	104.004	24.0379	72.1137	50	72.1137	216.341	216.341	50	72.1137	150	72.1137	104.002	24.0379	104.002	34.6675	50	50	216.341	16.6667	150
B362	24.0379	16.6667	34.6675	16.6667	16.6667	450	34.6675	16.6667	16.6667	34.6675	16.6667	16.6667	16.6667	16.6667	24.0379	50	16.6667	16.6667	16.6667	104.002	34.6675	34.6675	34.6675	24.0379	16.6667	16.6667	50	34.6675	34.6675	72.1137	16.6667	50	16.6667	34.6675	24.0379	34.6675
H363	24.0379	16.6667	16.6667	24.0379	16.6667	16.6667	72.1137	72.1137	72.1137	104.002	16.6667	16.6667	24.0379	34.6675	50	50	16.6667	72.1137	16.6667	16.6667	16.6667	72.1137	50	34.6675	16.6667	16.6667	34.6675	104.002	104.002	16.6667	34.6675	50	50	24.0379	34.6675	16.6667
S364	34.6675	16.6667	24.0379	34.6675	104.002	16.6667	34.6675	24.0379	16.6667	72.1137	312.007	34.6675	16.6667	24.0379	16.6667	24.0379	34.6681	16.6667	312.007	312.007	312.007	216.341	34.6675	50	16.6667	34.6675	34.6675	312.007	72.1137	72.1137	50	16.6667	24.0379	16.6667	34.6675	24.0379
N365	24.0379	24.0379	24.0379	24.0379	104.002	16.6667	34.6675	24.0379	16.6667	150	312.007	24.0379	16.6667	16.6667	16.6667	16.6667	16.6667	16.6667	312.007	34.6675	312.007	34.6675	72.1137	34.6675	72.1137	24.0379	24.0379	50	150	150	24.0379	16.6667	24.0379	24.0379	16.6667	24.0379
S366	16.6667	16.6667	34.6675	16.6667	24.0379	16.6667	24.0379	450	16.6667	24.0379	24.0379	50	16.6667	24.0379	72.1137	16.6667	34.6681	34.6675	24.0379	24.0379	24.0379	24.0379	24.0379	34.6675	50	16.6667	50	24.0379	34.6675	24.0379	16.6667	16.6667	72.1137	50	50	24.0379
H367	24.0379	24.0379	16.6667	16.6667	16.6667	50	24.0379	34.6675	216.341	72.1137	16.6667	34.6675	34.6675	34.6675	16.6667	24.0379	24.0375	16.6667	16.6667	16.6667	16.6667	24.0379	24.0379	24.0379	34.6675	34.6675	24.0379	72.1137	72.1137	16.6667	34.6675	24.0379	34.6675	16.6667	16.6667	50
S368	16.6667	104.002	34.6675	16.6667	216.341	24.0379	16.6667	24.0379	104.002	72.1137	16.6667	34.6675	24.0379	24.0379	16.6667	16.6667	16.6667	16.6667	16.6667	16.6667	16.6667	16.6667	16.6667	16.6667	34.6675	34.6675	34.6675	72.1137	72.1137	16.6667	34.6675	16.6667	16.6667	16.6667	34.6675	16.6667
H369	72.1137	24.0379	24.0379	34.6675	150	16.6667	216.341	16.6667	16.6667	34.6675	150	34.6675	34.6675	24.0379	16.6667	16.6667	34.6681	16.6667	150	150	34.6675	216.341	24.0379	216.341	50	34.6675	34.6675	450	34.6675	34.6675	24.0379	24.0379	16.6667	24.0379	24.0379	16.6667
S370	150	50	150	16.6667	34.6675	24.0379	16.6667	72.1137	24.0379	50	50	34.6675	16.6667	72.1137	150	450	16.6667	24.0379	50	50	50	24.0379	16.6667	16.6667	34.6675	72.1137	34.6675	50	450	50	24.0379	72.1137	104.002	16.6667	72.1137	16.6667
H371	450	34.6675	150	24.0379	34.6675	24.0379	450	16.6667	104.002	24.0379	72.1137	150	16.6667	72.1137	24.0379	24.0379	450	24.0379	72.1137	72.1137	16.6667	450	450	24.0379	150	24.0379	150	24.0379	104.002	24.0379	50	16.6667	72.1137	50	72.1137	24.0379
N372	24.0379	16.6667	34.6675	50	34.6675	16.6667	104.002	24.0379	16.6667	50	72.1137	34.6675	50	72.1137	24.0379	24.0379	34.6681	16.6667	72.1137	16.6667	72.1137	104.002	34.6675	104.002	24.0379	34.6675	34.6675	16.6667	50	50	34.6675	34.6675	16.6667	50	72.1137	34.6675
H373	50	72.1137	16.6667	24.0379	34.6675	24.0379	50	104.002	16.6667	34.6675	24.0379	104.002	72.1137	104.002	72.1137	150	16.6667	50	24.0379	24.0379	150	50	16.6667	150	104.002	34.6675	104.002	34.6675	312.007	34.6675	150	216.341	72.1137	150	34.6675	450
S374	72.1137	50	150	24.0379	34.6675	34.6675	312.007	72.1137	16.6667	150	72.1137	72.1137	16.6667	16.6667	34.6675	50	150	34.6675	72.1137	24.0379	72.1137	312.007	24.0379	312.007	72.1137	216.341	72.1137	150	16.6667	150	16.6667	16.6667	72.1137	450	16.6667	34.6675
H375	24.0379	34.6675	50	104.002	312.007	150	24.0379	16.6667	34.6675	150	24.0379	50	34.6675	16.6667	16.6667	16.6667	16.6667	34.6675	24.0379	24.0379	24.0379	24.0379	24.0379	24.0379	16.6667	50	50	50	150	150	34.6675	34.6675	34.6675	16.6667	16.6667	50
S376	50	16.6667	24.0379	24.0379	72.1137	24.0379	16.6667	34.6675	24.0379	50	150	34.6675	50	16.6667	24.0379	16.6667	16.6667	16.6667	150	312.007	50	16.6667	16.6667	16.6667	24.0379	34.6675	34.6675	24.0379	50	50	16.6667	16.6667	24.0379	16.6667	50	34.6675
H377	16.6667	104.002	24.0379	16.6667	24.0379	16.6667	16.6667	72.1137	16.6667	16.6667	16.6667	16.6667	16.6667	24.0379	16.6667	16.6667	16.6667	34.6675	16.6667	16.6667	16.6667	16.6667	16.6667	16.6667	16.6667	16.6667	24.0379	16.6667	16.6667	16.6667	16.6667	16.6667	16.6667	16.6667	24.0379	16.6667
N378	34.6675	24.0379	16.6667	50	16.6667	24.0379	34.6675	24.0379	72.1137	72.1137	16.6667	16.6667	16.6667	50	24.0379	24.0379	16.6667	16.6667	16.6667	16.6667	16.6667	34.6675	104.002	104.002	16.6667	16.6667	34.6675	72.1137	72.1137	16.6667	24.0379	24.0379	24.0379	24.0379	16.6667	24.0379
N379	34.6675	16.6667	16.6667	16.6667	16.6667	16.6667	50	50	104.002	24.0379	16.6667	16.6667	34.6675	34.6675	24.0379	34.6675	16.6667	34.6675	450	16.6667	24.0379	24.0379	50	24.0379	16.6667	16.6667	16.6667	24.0379	24.0379	16.6667	24.0379	16.6667	16.6667	24.0379	16.6667	24.0379
B380	104.002	72.1137	450	50	50	50	34.6675	34.6675	50	50	24.0379	72.1137	150	312.007	34.6675	34.6675	72.1125	104.002	24.0379	104.002	104.002	34.6675	34.6675	16.6667	24.0379	72.1137	72.1137	16.6667	50	50	450	104.002	16.6667	72.1137	450	34.6675
H381	16.6667	24.0379	16.6667	16.6667	16.6667	34.6675	50	34.6675	16.6667	50	72.1137	24.0379	50	50	150	104.002	50	34.6675	16.6667	72.1137	72.1137	50	50	16.6667	24.0379	24.0379	16.6667	50	50	16.6667	72.1137	24.0379	50	50	450	16.6667
S382	16.6667	16.6667	34.6675	24.0379	24.0379	16.6667	24.0379	150	16.6667	16.6667	24.0379	24.0379	24.0379	50	50	16.6667	34.6681	34.6675	24.0379	24.0379	24.0379	72.1137	24.0379	104.002	24.0379	150	24.0379	16.6667	24.0379	16.6667	24.0379	34.6675	72.1137	34.6675	24.0379	16.6667
B383	16.6667	16.6667	16.6667	24.0379	16.6667	16.6667	24.0379	150	16.6667	16.6667	24.0379	450	34.6675	24.0379	72.1137	34.6675	34.6681	50	24.0379	24.0379	24.0379	24.0379	24.0379	16.6667	450	104.002	450	16.6667	16.6667	16.6667	16.6667	34.6675	24.0379	50	16.6667	72.1137
H384	16.6667	16.6667	16.6667	34.6675	34.6675	24.0379	150	34.6675	24.0379	34.6675	216.341	24.0379	72.1137	16.6667	34.6675	34.6675	50	24.0379	216.341	24.0379	24.0379	150	150	150	16.6667	24.0379	24.0379	16.6667	34.6675	34.6675	104.002	72.1137	24.0379	34.6675	104.002	16.6667
S385	104.002	16.6667	16.6667	16.6667	16.6667	50	24.0379	24.0379	312.007	16.6667	24.0379	16.6667	16.6667	34.6675	24.0379	24.0379	16.6667	16.6667	24.0379	24.0379	24.0379	24.0379	150	24.0379	16.6667	16.6667	16.6667	16.6667	16.6667	16.6667	24.0379	50	34.6675	24.0379	24.0379	34.6675
H386	50	16.6667	16.6667	312.007	16.6667	16.6667	104.002	24.0379	24.0379	16.6667	34.6675	104.002	24.0379	24.0379	72.1137	72.1137	24.0375	104.002	34.6675	34.6675	16.6667	104.002	34.6675	104.002	104.002	34.6675	104.002	16.6667	216.341	16.6667	16.6667	50	50	24.0379	16.6667	50
B387	34.6675	16.6667	24.0379	16.6667	24.0379	16.6667	50	16.6667	34.6675	24.0379	16.6667	216.341	16.6667	16.6667	24.0379	34.6675	24.0375	50	16.6667	16.6667	50	50	24.0379	50	216.341	104.002	216.341	24.0379	50	24.0379	16.6667	34.6675	16.6667	16.6667	24.0379	34.6675
H388	16.6667	16.6667	50	16.6667	16.6667	16.6667	34.6675	50	16.6667	34.6675	50	34.6675	312.007	16.6667	72.1137	216.341	72.1125	72.1137	50	50	104.002	34.6675	34.6675	34.6675	34.6675	34.6675	34.6675	34.6675	34.6675	24.0379	150	16.6667	50	50	50	72.1137
S389	34.6675	16.6667	50	104.002	16.6667	450	16.6667	16.6667	450	72.1137	34.6675	16.6667	16.6667	34.6675	24.0379	50	24.0375	24.0379	34.6675	34.6675	34.6675	16.6667	16.6667	104.002	16.6667	16.6667	34.6675	72.1137	72.1137	34.6675	16.6667	50	16.6667	16.6667	16.6667	34.6675
B390	72.1137	34.6675	16.6667	24.0379	16.6667	34.6675	34.6675	24.0379	72.1137	50	16.6667	16.6667	24.0379	50	34.6675	16.6667	16.6667	16.6667	16.6667	16.6667	34.6675	34.6675	34.6675	104.002	16.6667	16.6667	34.6675	50	50	24.0379	24.0379	16.6667	24.0379	16.6667	34.6675	24.0379
S391	24.0379	24.0379	16.6667	72.1137	16.6667	50	16.6667	16.6667	104.002	50	24.0379	16.6667	16.6667	16.6667	24.0379	34.6675	16.6667	24.0379	24.0379	24.0379	104.002	16.6667	16.6667	16.6667	16.6667	16.6667	50	50	50	72.1137	24.0379	16.6667	24.0379	34.6675	24.0379	50
B392	50	50	216.341	150	50	72.1137	216.341	24.0379	16.6667	16.6667	24.0379	104.002	216.341	34.6675	312.007	216.341	216.337	34.6675	24.0379	24.0379	24.0379	216.341	216.341	24.0379	16.6667	104.002	104.002	50	16.6667	16.6667	72.1137	72.1137	216.341	104.002	104.002	150
S393	16.6667	16.6667	34.6675	24.0379	72.1137	16.6667	16.6667	34.6675	24.0379	16.6667	50	216.341	34.6675	34.6675	16.6667	24.0379	34.6681	16.6667	50	50	50	16.6667	16.6667	16.6667	216.341	50	216.341	16.6667	24.0379	16.6667	50	34.6675	24.0379	16.6667	50	34.6675
H394	24.0379	16.6667	16.6667	50	16.6667	34.6675	72.1137	24.0379	216.341	50	24.0379	16.6667	50	16.6667	24.0379	34.6675	16.6667	16.6667	24.0379	24.0379	24.0379	72.1137	16.6667	72.1137	16.6667	16.6667	24.0379	50	50	24.0379	24.0379	50	16.6667	50	72.1137	50
S395	24.0379	16.6667	72.1137	16.6667	16.6667	312.007	16.6667	24.0379	24.0379	16.6667	16.6667	16.6667	24.0379	50	24.0379	50	34.6681	50	16.6667	16.6667	16.6667	16.6667	16.6667	16.6667	16.6667	16.6667	16.6667	16.6667	16.6667	34.6675	50	16.6667	16.6667	24.0379	24.0379	24.0379
H396	72.1137	34.6675	16.6667	34.6675	16.6667	24.0379	104.002	34.6675	72.1137	312.007	16.6667	312.007	150	50	72.1137	216.341	312.013	72.1137	16.6667	104.002	50	24.0379	104.002	104.002	312.007	24.0379	312.007	312.007	50	312.007	216.341	312.007	72.1137	104.002	104.002	24.0379
S397	34.6675	16.6667	16.6667	104.002	16.6667	50	16.6667	16.6667	72.1137	50	24.0379	16.6667	16.6667	50	16.6667	24.0379	16.6667	16.6667	24.0379	24.0379	24.0379	16.6667	216.341	72.1137	16.6667	16.6667	16.6667	50	50	34.6675	34.6675	16.6667	34.6675	34.6675	16.6667	50
H398	216.341	50	16.6667	34.6675	34.6675	34.6675	312.007	24.0379	16.6667	16.6667	104.002	104.002	24.0379	34.6675	24.0379	72.1137	72.1125	104.002	104.002	16.6667	104.002	312.007	312.007	312.007	104.002	16.6667	104.002	16.6667	72.1137	16.6667	24.0379	50	34.6675	50	16.6667	72.1137
S399	50	16.6667	104.002	24.0379	16.6667	24.0379	16.6667	34.6675	216.341	16.6667	24.0379	34.6675	24.0379	72.1137	24.0379	16.6667	24.0375	24.0379	24.0379	24.0379	24.0379	16.6667	16.6667	312.007	34.6675	34.6675	16.6667	16.6667	16.6667	16.6667	50	150	24.0379	34.6675	34.6675	72.1137
B400	24.0379	216.341	72.1137	150	150	16.6667	24.0379	16.6667	34.6675	16.6667	72.1137	24.0379	34.6675	16.6667	24.0379	50	24.0375	50	50	72.1137	72.1137	24.0379	16.6667	24.0379	34.6675	24.0379	24.0379	16.6667	16.6667	16.6667	16.6667	24.0379	24.0379	16.6667	50	16.6667
H401	24.0379	72.1137	24.0379	24.0379	150	24.0379	72.1137	16.6667	16.6667	150	150	24.0379	16.6667	50	34.6675	16.6667	24.0375	16.6667	150	104.002	150	72.1137	16.6667	16.6667	24.0379	24.0379	24.0379	16.6667	150	150	16.6667	16.6667	16.6667	34.6675	50	34.6675
S402	34.6675	34.6675	104.002	72.1137	24.0379	34.6675	150	216.341	16.6667	16.6667	50	150	50	50	24.0379	16.6667	450	24.0379	24.0379	50	34.6675	150	150	24.0379	150	34.6675	150	16.6667	312.007	16.6667	50	16.6667	104.002	312.007	72.1137	216.341
B403	24.0379	16.6667	16.6667	450	16.6667	34.6675	16.6667	16.6667	150	150	24.0379	16.6667	34.6675	16.6667	34.6675	34.6675	16.6667	16.6667	24.0379	24.0379	104.002	16.6667	16.6667	16.6667	16.6667	16.6667	16.6667	150	150	16.6667	16.6667	16.6667	16.6667	24.0379	34.6675	24.0379
S404	16.6667	72.1137	16.6667	16.6667	24.0379	16.6667	16.6667	24.0379	72.1137	24.0379	16.6667	16.6667	16.6667	50	34.6675	16.6667	16.6667	24.0379	16.6667	16.6667	104.002	16.6667	16.6667	24.0379	16.6667	16.6667	16.6667	24.0379	24.0379	16.6667	24.0379	16.6667	16.6667	34.6675	24.0379	50
H405	16.6667	16.6667	16.6667	34.6675	16.6667	16.6667	72.1137	72.1137	72.1137	104.002	16.6667	16.6667	16.6667	104.002	104.002	50	16.6667	72.1137	16.6667	16.6667	16.6667	72.1137	72.1137	72.1137	16.6667	16.6667	16.6667	104.002	104.002	150	24.0379	50	104.002	34.6675	24.0379	24.0379
S406	16.6667	16.6667	16.6667	16.6667	16.6667	16.6667	16.6667	450	16.6667	24.0379	50	450	24.0379	34.6675	34.6675	16.6667	50	24.0379	50	216.341	50	16.6667	16.6667	16.6667	450	50	450	24.0379	34.6675	24.0379	50	16.6667	50	16.6667	16.6667	16.6667
H407	104.002	216.341	312.007	312.007	50	34.6675	150	34.6675	24.0379	16.6667	34.6675	104.002	72.1137	450	72.1137	16.6667	104.004	72.1137	24.0379	16.6667	24.0379	150	150	150	104.002	104.002	104.002	16.6667	16.6667	16.6667	34.6675	72.1137	216.341	24.0379	72.1137	104.002
S408	16.6667	16.6667	16.6667	34.6675	16.6667	34.6675	16.6667	24.0379	216.341	34.6675	24.0379	16.6667	24.0379	50	16.6667	24.0379	34.6681	16.6667	24.0379	24.0379	104.002	16.6667	16.6667	16.6667	16.6667	16.6667	24.0379	34.6675	34.6675	34.6675	24.0379	150	50	24.0379	16.6667	50
H409	24.0379	72.1137	24.0379	24.0379	16.6667	34.6675	104.002	72.1137	24.0379	34.6675	16.6667	24.0379	50	450	450	72.1137	34.6681	72.1137	16.6667	72.1137	16.6667	150	104.002	150	24.0379	24.0379	24.0379	34.6675	34.6675	16.6667	72.1137	150	216.341	150	50	150
S410	16.6667	16.6667	72.1137	104.002	150	16.6667	34.6675	16.6667	24.0379	16.6667	312.007	24.0379	24.0379	16.6667	16.6667	50	34.6681	16.6667	312.007	34.6675	34.6675	34.6675	34.6675	34.6675	34.6675	24.0379	24.0379	72.1137	16.6667	16.6667	16.6667	34.6675	24.0379	24.0379	16.6667	50
B411	34.6675	34.6675	24.0379	24.0379	104.002	16.6667	72.1137	16.6667	16.6667	50	150	24.0379	16.6667	16.6667	24.0379	16.6667	16.6667	16.6667	150	150	150	72.1137	72.1137	72.1137	16.6667	24.0379	24.0379	16.6667	50	50	16.6667	24.0379	24.0379	50	50	16.6667
S412	24.0379	16.6667	16.6667	16.6667	16.6667	16.6667	34.6675	34.6675	104.002	16.6667	16.6667	24.0379	16.6667	34.6675	24.0379	24.0379	16.6667	16.6667	16.6667	16.6667	24.0379	24.0379	150	34.6675	24.0379	24.0379	16.6667	16.6667	16.6667	16.6667	16.6667	50	24.0379	16.6667	16.6667	16.6667
H413	16.6667	50	34.6675	72.1137	450	16.6667	50	16.6667	16.6667	34.6675	216.341	24.0379	24.0379	24.0379	16.6667	24.0379	34.6681	16.6667	216.341	16.6667	16.6667	50	50	104.002	24.0379	24.0379	24.0379	72.1137	34.6675	34.6675	16.6667	16.6667	24.0379	16.6667	34.6675	16.6667
S414	50	34.6675	72.1137	16.6667	24.0379	24.0379	16.6667	24.0379	34.6675	16.6667	16.6667	104.002	16.6667	16.6667	16.6667	16.6667	34.6681	34.6675	16.6667	72.1137	24.0379	16.6667	16.6667	16.6667	104.002	104.002	104.002	16.6667	24.0379	16.6667	16.6667	50	16.6667	24.0379	16.6667	16.6667
H415	16.6667	16.6667	16.6667	16.6667	16.6667	50	34.6675	50	16.6667	104.002	72.1137	216.341	24.0379	16.6667	16.6667	312.007	150	72.1137	16.6667	72.1137	72.1137	34.6675	16.6667	312.007	216.341	24.0379	216.341	104.002	34.6675	104.002	24.0379	50	16.6667	24.0379	16.6667	24.0379
H416	16.6667	104.002	24.0379	16.6667	150	16.6667	24.0379	50	104.002	24.0379	16.6667	34.6675	24.0379	16.6667	16.6667	16.6667	16.6667	24.0379	16.6667	16.6667	216.341	24.0379	34.6675	24.0379	34.6675	34.6675	16.6667	24.0379	24.0379	34.6675	34.6675	24.0379	24.0379	16.6667	16.6667	16.6667
S417	50	104.002	24.0379	16.6667	24.0379	16.6667	34.6675	72.1137	16.6667	16.6667	16.6667	24.0379	24.0379	50	50	16.6667	24.0375	24.0379	16.6667	16.6667	24.0379	34.6675	34.6675	50	24.0379	24.0379	24.0379	16.6667	16.6667	50	24.0379	34.6675	24.0379	16.6667	50	50
H418	312.007	50	72.1137	50	16.6667	24.0379	72.1137	72.1137	16.6667	34.6675	50	34.6675	50	16.6667	150	150	50	24.0379	50	34.6675	50	72.1137	72.1137	150	34.6675	216.341	34.6675	34.6675	104.002	34.6675	34.6675	50	72.1137	24.0379	104.002	24.0379
B419	16.6667	50	16.6667	50	24.0379	34.6675	50	24.0379	72.1137	24.0379	24.0379	16.6667	150	16.6667	50	50	50	24.0379	24.0379	24.0379	24.0379	50	50	50	16.6667	16.6667	16.6667	34.6675	24.0379	24.0379	150	72.1137	16.6667	24.0379	34.6675	34.6675
H420	16.6667	24.0379	16.6667	16.6667	16.6667	16.6667	72.1137	34.6675	104.002	16.6667	16.6667	16.6667	34.6675	16.6667	16.6667	16.6667	16.6667	24.0379	72.1137	16.6667	16.6667	72.1137	16.6667	72.1137	16.6667	16.6667	16.6667	16.6667	16.6667	104.002	24.0379	16.6667	50	24.0379	50	72.1137
S421	16.6667	50	16.6667	34.6675	16.6667	16.6667	24.0379	34.6675	50	24.0379	216.341	16.6667	104.002	34.6675	16.6667	34.6675	50	16.6667	216.341	216.341	216.341	24.0379	16.6667	16.6667	24.0379	16.6667	16.6667	34.6675	24.0379	24.0379	104.002	72.1137	50	34.6675	34.6675	16.6667
H422	50	450	34.6675	24.0379	72.1137	24.0379	24.0379	34.6675	16.6667	104.002	16.6667	34.6675	16.6667	24.0379	16.6667	16.6667	16.6667	16.6667	16.6667	16.6667	16.6667	24.0379	24.0379	24.0379	16.6667	34.6675	34.6675	72.1137	104.002	104.002	24.0379	16.6667	24.0379	24.0379	50	16.6667
B423	16.6667	16.6667	104.002	34.6675	50	16.6667	16.6667	72.1137	150	104.002	16.6667	16.6667	16.6667	16.6667	50	16.6667	24.0375	312.007	16.6667	16.6667	16.6667	16.6667	16.6667	16.6667	16.6667	16.6667	16.6667	104.002	104.002	16.6667	16.6667	24.0379	24.0379	24.0379	16.6667	16.6667
N424	16.6667	104.002	24.0379	34.6675	72.1137	16.6667	24.0379	72.1137	312.007	24.0379	16.6667	16.6667	24.0379	72.1137	16.6667	16.6667	16.6667	34.6675	16.6667	24.0379	50	24.0379	16.6667	24.0379	16.6667	16.6667	34.6675	24.0379	24.0379	34.6675	24.0379	16.6667	16.6667	24.0379	16.6667	24.0379
S425	24.0379	16.6667	16.6667	16.6667	34.6675	24.0379	16.6667	24.0379	24.0379	104.002	72.1137	72.1137	16.6667	50	16.6667	104.002	150	150	72.1137	72.1137	72.1137	16.6667	16.6667	24.0379	72.1137	50	72.1137	104.002	150	104.002	50	104.002	34.6675	50	34.6675	16.6667
H426	16.6667	72.1137	34.6675	24.0379	24.0379	16.6667	24.0379	104.002	16.6667	16.6667	16.6667	34.6675	16.6667	50	34.6675	16.6667	16.6667	16.6667	16.6667	16.6667	16.6667	34.6675	24.0379	24.0379	34.6675	72.1137	34.6675	16.6667	24.0379	16.6667	24.0379	16.6667	34.6675	34.6675	16.6667	34.6675
B427	16.6667	24.0379	50	16.6667	24.0379	34.6675	16.6667	24.0379	34.6675	24.0379	16.6667	16.6667	16.6667	24.0379	34.6675	34.6675	34.6681	34.6675	16.6667	24.0379	34.6675	16.6667	24.0379	16.6667	16.6667	50	16.6667	24.0379	216.341	24.0379	50	16.6667	24.0379	24.0379	34.6675	50
H428	16.6667	16.6667	16.6667	16.6667	16.6667	16.6667	16.6667	16.6667	16.6667	16.6667	16.6667	16.6667	16.6667	16.6667	16.6667	16.6667	16.6667	16.6667	16.6667	16.6667	16.6667	16.6667	16.6667	16.6667	16.6667	16.6667	16.6667	16.6667	16.6667	16.6667	16.6667	16.6667	16.6667	16.6667	16.6667	16.6667
N429	16.6667	104.002	24.0379	16.6667	150	16.6667	16.6667	34.6675	104.002	16.6667	16.6667	34.6675	16.6667	16.6667	24.0379	16.6667	16.6667	16.6667	16.6667	16.6667	16.6667	16.6667	16.6667	16.6667	34.6675	34.6675	16.6667	16.6667	16.6667	16.6667	50	34.6675	34.6675	50	34.6675	16.6667
H430	312.007	34.6675	16.6667	24.0379	50	34.6675	34.6675	16.6667	34.6675	312.007	72.1137	50	50	24.0379	72.1137	50	34.6681	50	72.1137	72.1137	16.6667	16.6667	34.6675	34.6675	16.6667	50	50	50	312.007	312.007	16.6667	34.6675	104.002	50	24.0379	312.007
S431	50	24.0379	72.1137	16.6667	50	24.0379	16.6667	24.0379	34.6675	34.6675	24.0379	34.6675	16.6667	16.6667	34.6675	24.0379	16.6667	34.6675	24.0379	150	24.0379	16.6667	24.0379	16.6667	34.6675	24.0379	34.6675	34.6675	16.6667	34.6675	24.0379	16.6667	16.6667	16.6667	16.6667	24.0379
S432	34.6675	16.6667	50	150	104.002	24.0379	24.0379	16.6667	34.6675	16.6667	50	34.6675	34.6675	50	24.0379	50	24.0375	50	50	50	50	24.0379	24.0379	50	16.6667	34.6675	34.6675	50	16.6667	16.6667	24.0379	16.6667	24.0379	24.0379	16.6667	16.6667
H433	34.6675	24.0379	104.002	24.0379	16.6667	34.6675	104.002	104.002	16.6667	34.6675	24.0379	104.002	72.1137	72.1137	16.6667	150	50	72.1137	24.0379	24.0379	24.0379	16.6667	72.1137	50	104.002	72.1137	104.002	34.6675	216.341	34.6675	72.1137	16.6667	150	312.007	50	150
S434	16.6667	216.341	24.0379	34.6675	16.6667	24.0379	16.6667	34.6675	104.002	16.6667	16.6667	24.0379	16.6667	50	16.6667	34.6675	24.0375	24.0379	16.6667	16.6667	24.0379	16.6667	34.6675	450	24.0379	24.0379	16.6667	16.6667	16.6667	104.002	34.6675	24.0379	50	16.6667	16.6667	34.6675
H435	34.6675	24.0379	16.6667	150	72.1137	50	150	16.6667	16.6667	16.6667	16.6667	16.6667	24.0379	216.341	312.007	16.6667	50	34.6675	16.6667	16.6667	104.002	150	104.002	16.6667	16.6667	16.6667	16.6667	50	16.6667	16.6667	104.002	104.002	312.007	312.007	150	312.007
S436	16.6667	16.6667	72.1137	216.341	150	16.6667	24.0379	16.6667	24.0379	16.6667	450	16.6667	16.6667	34.6675	24.0379	104.002	24.0375	24.0379	450	450	450	24.0379	24.0379	24.0379	34.6675	16.6667	16.6667	34.6675	16.6667	16.6667	16.6667	34.6675	16.6667	24.0379	16.6667	16.6667
H437	72.1137	24.0379	16.6667	216.341	16.6667	16.6667	16.6667	16.6667	50	34.6675	16.6667	50	34.6675	24.0379	72.1137	72.1137	16.6667	104.002	16.6667	16.6667	16.6667	50	16.6667	72.1137	72.1137	50	50	16.6667	34.6675	34.6675	24.0379	24.0379	24.0379	16.6667	24.0379	16.6667
S438	16.6667	104.002	24.0379	16.6667	150	16.6667	24.0379	50	104.002	24.0379	16.6667	50	16.6667	16.6667	34.6675	16.6667	34.6681	34.6675	16.6667	16.6667	16.6667	24.0379	16.6667	24.0379	50	50	16.6667	24.0379	24.0379	16.6667	24.0379	16.6667	24.0379	16.6667	24.0379	24.0379
H439	50	34.6675	24.0379	16.6667	24.0379	50	50	104.002	16.6667	150	72.1137	450	34.6675	50	16.6667	150	104.004	50	72.1137	72.1137	34.6675	50	24.0379	34.6675	450	216.341	450	150	16.6667	150	24.0379	50	24.0379	34.6675	16.6667	16.6667
S440	24.0379	72.1137	24.0379	24.0379	312.007	16.6667	50	16.6667	16.6667	34.6675	150	24.0379	34.6675	16.6667	16.6667	24.0379	16.6667	16.6667	150	150	150	50	50	50	24.0379	24.0379	24.0379	16.6667	34.6675	34.6675	16.6667	24.0379	16.6667	16.6667	16.6667	16.6667
H441	24.0379	24.0379	16.6667	16.6667	16.6667	24.0379	50	34.6675	150	16.6667	16.6667	24.0379	24.0379	24.0379	24.0379	16.6667	16.6667	16.6667	16.6667	16.6667	50	50	50	50	24.0379	24.0379	16.6667	16.6667	16.6667	16.6667	16.6667	16.6667	24.0379	34.6675	24.0379	16.6667
S442	24.0379	16.6667	16.6667	50	16.6667	34.6675	50	24.0379	216.341	50	34.6675	16.6667	16.6667	16.6667	16.6667	34.6675	24.0375	16.6667	34.6675	34.6675	150	34.6675	50	50	16.6667	16.6667	16.6667	50	50	34.6675	34.6675	104.002	34.6675	50	16.6667	50
H443	450	50	72.1137	24.0379	24.0379	24.0379	104.002	72.1137	16.6667	16.6667	104.002	150	16.6667	34.6675	34.6675	16.6667	216.337	50	104.002	104.002	50	104.002	24.0379	216.341	150	72.1137	150	16.6667	50	16.6667	24.0379	24.0379	50	104.002	16.6667	16.6667
S444	24.0379	16.6667	24.0379	16.6667	16.6667	104.002	34.6675	16.6667	24.0379	24.0379	16.6667	16.6667	16.6667	16.6667	16.6667	16.6667	16.6667	24.0379	16.6667	72.1137	24.0379	50	34.6675	34.6675	16.6667	16.6667	50	24.0379	24.0379	34.6675	16.6667	24.0379	34.6675	24.0379	16.6667	16.6667
H445	50	16.6667	24.0379	24.0379	50	16.6667	50	16.6667	50	24.0379	34.6675	34.6675	24.0379	34.6675	34.6675	16.6667	16.6667	24.0379	34.6675	34.6675	34.6675	50	16.6667	50	16.6667	34.6675	34.6675	24.0379	24.0379	24.0379	16.6667	24.0379	24.0379	24.0379	16.6667	50
S446	24.0379	16.6667	16.6667	16.6667	16.6667	16.6667	34.6675	50	104.002	24.0379	16.6667	24.0379	34.6675	16.6667	24.0379	34.6675	16.6667	24.0379	16.6667	16.6667	16.6667	34.6675	34.6675	34.6675	24.0379	24.0379	16.6667	24.0379	24.0379	16.6667	16.6667	24.0379	16.6667	16.6667	34.6675	34.6675
H447	72.1137	50	104.002	50	34.6675	50	104.002	150	16.6667	216.341	50	450	72.1137	24.0379	16.6667	50	72.1125	24.0379	24.0379	50	50	104.002	16.6667	150	450	150	450	216.341	16.6667	216.341	50	24.0379	50	104.002	24.0379	104.002
H448	150	24.0379	104.002	50	16.6667	34.6675	150	16.6667	72.1137	312.007	34.6675	150	104.002	104.002	312.007	72.1137	104.004	72.1137	34.6675	34.6675	50	16.6667	150	150	150	450	150	312.007	72.1137	312.007	72.1137	150	104.002	216.341	216.341	216.341
S449	34.6675	16.6667	16.6667	312.007	16.6667	50	16.6667	16.6667	150	72.1137	24.0379	24.0379	24.0379	16.6667	34.6675	16.6667	24.0375	16.6667	16.6667	72.1137	24.0379	72.1137	72.1137	16.6667	24.0379	24.0379	24.0379	72.1137	72.1137	16.6667	34.6675	16.6667	24.0379	16.6667	16.6667	16.6667
H450	24.0379	34.6675	16.6667	24.0379	16.6667	24.0379	312.007	216.341	50	104.002	50	312.007	150	34.6675	72.1137	150	312.013	150	50	216.341	24.0379	312.007	312.007	16.6667	312.007	150	312.007	104.002	150	104.002	216.341	450	150	150	312.007	72.1137
S451	16.6667	72.1137	16.6667	16.6667	150	16.6667	34.6675	34.6675	104.002	16.6667	16.6667	16.6667	34.6675	34.6675	16.6667	16.6667	16.6667	24.0379	16.6667	16.6667	16.6667	34.6675	34.6675	34.6675	16.6667	16.6667	34.6675	16.6667	16.6667	50	24.0379	24.0379	34.6675	50	16.6667	50
H452	16.6667	72.1137	24.0379	24.0379	312.007	24.0379	50	16.6667	16.6667	50	150	24.0379	16.6667	34.6675	16.6667	16.6667	16.6667	16.6667	150	150	24.0379	50	50	50	16.6667	24.0379	24.0379	150	50	50	24.0379	24.0379	50	16.6667	50	50
S453	24.0379	16.6667	50	16.6667	16.6667	150	16.6667	24.0379	24.0379	24.0379	16.6667	16.6667	34.6675	50	16.6667	50	16.6667	34.6675	16.6667	34.6675	24.0379	24.0379	16.6667	16.6667	16.6667	16.6667	34.6675	24.0379	24.0379	72.1137	34.6675	34.6675	16.6667	24.0379	16.6667	16.6667
H454	16.6667	16.6667	216.341	50	34.6675	24.0379	150	312.007	24.0379	50	50	216.341	216.341	104.002	216.341	72.1137	216.337	150	50	50	50	150	312.007	150	216.341	72.1137	216.341	50	34.6675	50	216.341	312.007	216.341	216.341	150	104.002
S455	24.0379	16.6667	50	24.0379	16.6667	16.6667	34.6675	34.6675	34.6675	16.6667	34.6675	16.6667	104.002	16.6667	72.1137	104.002	50	24.0379	34.6675	34.6675	16.6667	34.6675	104.002	34.6675	16.6667	16.6667	34.6675	16.6667	16.6667	24.0379	216.341	34.6675	16.6667	150	104.002	34.6675
H456	150	50	312.007	34.6675	24.0379	24.0379	450	34.6675	50	24.0379	72.1137	150	72.1137	104.002	16.6667	16.6667	150	34.6675	72.1137	34.6675	72.1137	16.6667	450	216.341	150	450	150	24.0379	16.6667	24.0379	34.6675	16.6667	50	24.0379	24.0379	72.1137
S457	50	72.1137	24.0379	50	312.007	16.6667	50	16.6667	16.6667	24.0379	150	24.0379	50	34.6675	34.6675	24.0379	16.6667	16.6667	150	150	24.0379	50	50	34.6675	24.0379	24.0379	24.0379	16.6667	24.0379	24.0379	50	16.6667	34.6675	50	16.6667	24.0379
B458	34.6675	24.0379	16.6667	16.6667	24.0379	24.0379	16.6667	150	16.6667	24.0379	24.0379	150	24.0379	24.0379	72.1137	16.6667	24.0375	72.1137	104.002	24.0379	312.007	16.6667	16.6667	16.6667	150	312.007	150	24.0379	16.6667	24.0379	50	24.0379	104.002	34.6675	16.6667	24.0379
S459	16.6667	24.0379	34.6675	16.6667	16.6667	312.007	16.6667	16.6667	24.0379	16.6667	16.6667	16.6667	16.6667	16.6667	24.0379	24.0379	16.6667	24.0379	16.6667	16.6667	16.6667	16.6667	16.6667	104.002	16.6667	16.6667	16.6667	16.6667	16.6667	16.6667	16.6667	24.0379	24.0379	16.6667	16.6667	34.6675
B460	24.0379	72.1137	24.0379	24.0379	312.007	16.6667	50	16.6667	16.6667	50	150	34.6675	24.0379	24.0379	24.0379	16.6667	16.6667	16.6667	150	150	150	50	50	50	16.6667	34.6675	34.6675	24.0379	50	50	16.6667	34.6675	24.0379	16.6667	50	34.6675
S461	312.007	24.0379	216.341	24.0379	34.6675	34.6675	16.6667	34.6675	216.341	16.6667	24.0379	50	16.6667	50	34.6675	16.6667	34.6681	16.6667	24.0379	24.0379	24.0379	16.6667	16.6667	16.6667	50	50	24.0379	16.6667	16.6667	16.6667	34.6675	104.002	72.1137	34.6675	72.1137	72.1137
H462	34.6675	72.1137	24.0379	24.0379	24.0379	34.6675	72.1137	450	72.1137	312.007	16.6667	312.007	150	24.0379	16.6667	104.002	150	104.002	16.6667	16.6667	34.6675	34.6675	34.6675	72.1137	312.007	50	312.007	312.007	50	312.007	216.341	104.002	24.0379	72.1137	16.6667	72.1137
B463	104.002	16.6667	16.6667	150	16.6667	16.6667	24.0379	16.6667	24.0379	24.0379	34.6675	104.002	24.0379	72.1137	104.002	72.1137	34.6681	104.002	50	34.6675	34.6675	24.0379	16.6667	24.0379	72.1137	104.002	104.002	50	24.0379	24.0379	16.6667	50	50	16.6667	16.6667	16.6667
S464	24.0379	16.6667	16.6667	34.6675	16.6667	50	50	34.6675	312.007	24.0379	34.6675	16.6667	72.1137	24.0379	16.6667	16.6667	16.6667	24.0379	24.0379	34.6675	34.6675	50	50	16.6667	16.6667	16.6667	16.6667	24.0379	24.0379	16.6667	72.1137	104.002	24.0379	104.002	150	50
N465	16.6667	16.6667	72.1137	72.1137	72.1137	16.6667	50	16.6667	24.0379	34.6675	216.341	16.6667	16.6667	16.6667	50	24.0379	24.0375	16.6667	216.341	216.341	24.0379	50	104.002	24.0379	24.0379	16.6667	16.6667	16.6667	34.6675	34.6675	16.6667	34.6675	16.6667	34.6675	24.0379	16.6667
S466	50	16.6667	16.6667	16.6667	24.0379	16.6667	50	24.0379	34.6675	16.6667	24.0379	72.1137	34.6675	16.6667	34.6675	34.6675	34.6681	312.007	24.0379	24.0379	16.6667	50	50	24.0379	72.1137	150	72.1137	16.6667	34.6675	16.6667	34.6675	34.6675	16.6667	16.6667	16.6667	34.6675
H467	34.6675	34.6675	24.0379	104.002	34.6675	50	150	150	72.1137	16.6667	50	150	104.002	34.6675	50	34.6675	104.004	24.0379	50	50	50	150	24.0379	16.6667	150	50	150	16.6667	72.1137	16.6667	16.6667	34.6675	312.007	450	34.6675	216.341
N468	24.0379	16.6667	24.0379	16.6667	16.6667	16.6667	50	50	72.1137	34.6675	16.6667	16.6667	34.6675	50	50	50	34.6681	34.6675	16.6667	16.6667	16.6667	50	50	16.6667	16.6667	16.6667	24.0379	34.6675	34.6675	24.0379	24.0379	24.0379	104.002	34.6675	50	72.1137
H469	104.002	34.6675	216.341	72.1137	34.6675	24.0379	150	34.6675	16.6667	312.007	24.0379	150	50	104.002	312.007	72.1137	72.1125	50	24.0379	24.0379	450	150	34.6675	16.6667	150	72.1137	150	312.007	72.1137	312.007	16.6667	72.1137	216.341	104.002	216.341	450
S470	34.6675	34.6675	34.6675	24.0379	24.0379	72.1137	16.6667	50	312.007	16.6667	16.6667	50	16.6667	104.002	16.6667	104.002	50	34.6675	16.6667	16.6667	16.6667	16.6667	16.6667	24.0379	50	50	24.0379	16.6667	16.6667	16.6667	72.1137	150	312.007	104.002	24.0379	150
B471	150	50	24.0379	34.6675	50	72.1137	24.0379	24.0379	34.6675	150	34.6675	72.1137	72.1137	72.1137	72.1137	50	16.6667	104.002	34.6675	34.6675	34.6675	24.0379	24.0379	450	104.002	72.1137	72.1137	50	150	150	24.0379	216.341	312.007	16.6667	72.1137	104.002
S472	16.6667	216.341	72.1137	150	450	16.6667	50	16.6667	16.6667	24.0379	312.007	24.0379	34.6675	72.1137	16.6667	50	16.6667	16.6667	312.007	34.6675	312.007	50	50	50	34.6675	24.0379	24.0379	312.007	24.0379	24.0379	24.0379	16.6667	16.6667	34.6675	16.6667	24.0379
N473	104.002	24.0379	16.6667	34.6675	50	34.6675	24.0379	24.0379	34.6675	450	50	16.6667	50	16.6667	72.1137	34.6675	34.6681	50	50	50	16.6667	24.0379	24.0379	24.0379	34.6675	16.6667	16.6667	450	450	450	34.6675	16.6667	104.002	72.1137	72.1137	216.341
S474	34.6675	24.0379	216.341	50	34.6675	24.0379	34.6675	50	312.007	16.6667	16.6667	24.0379	16.6667	72.1137	16.6667	72.1137	34.6681	16.6667	16.6667	16.6667	16.6667	34.6675	34.6675	16.6667	24.0379	24.0379	16.6667	16.6667	16.6667	104.002	50	16.6667	104.002	50	24.0379	72.1137
H475	24.0379	312.007	24.0379	24.0379	16.6667	24.0379	104.002	216.341	72.1137	150	34.6675	216.341	104.002	24.0379	50	216.341	216.337	150	34.6675	34.6675	34.6675	104.002	104.002	150	216.341	50	216.341	150	24.0379	150	150	150	104.002	72.1137	104.002	72.1137
S476	24.0379	16.6667	24.0379	16.6667	16.6667	24.0379	16.6667	16.6667	24.0379	50	72.1137	216.341	34.6675	16.6667	34.6675	104.002	104.004	104.002	72.1137	16.6667	24.0379	16.6667	16.6667	16.6667	216.341	104.002	216.341	50	72.1137	50	16.6667	24.0379	16.6667	24.0379	16.6667	50
N477	50	16.6667	24.0379	24.0379	72.1137	16.6667	34.6675	34.6675	34.6675	34.6675	150	34.6675	34.6675	16.6667	16.6667	24.0379	34.6681	16.6667	150	72.1137	150	34.6675	34.6675	16.6667	34.6675	34.6675	34.6675	16.6667	34.6675	34.6675	50	24.0379	16.6667	50	16.6667	24.0379
N478	34.6675	104.002	24.0379	24.0379	24.0379	16.6667	24.0379	72.1137	16.6667	16.6667	16.6667	34.6675	16.6667	24.0379	50	16.6667	34.6681	16.6667	16.6667	16.6667	24.0379	24.0379	72.1137	24.0379	34.6675	34.6675	34.6675	16.6667	16.6667	34.6675	16.6667	50	16.6667	34.6675	34.6675	16.6667
H479	150	34.6675	16.6667	34.6675	16.6667	104.002	216.341	216.341	72.1137	150	50	72.1137	104.002	104.002	72.1137	34.6675	150	450	50	50	50	216.341	216.341	72.1137	72.1137	150	72.1137	150	72.1137	150	72.1137	16.6667	312.007	104.002	312.007	150
A480	34.6675	150	104.002	34.6675	16.6667	34.6675	50	104.002	72.1137	34.6675	34.6675	34.6675	72.1137	150	104.002	450	450	104.002	34.6675	34.6675	34.6675	50	50	72.1137	34.6675	16.6667	34.6675	34.6675	216.341	34.6675	24.0379	72.1137	16.6667	16.6667	150	24.0379
A481	24.0379	16.6667	16.6667	16.6667	16.6667	72.1137	72.1137	104.002	16.6667	34.6675	72.1137	72.1137	34.6675	16.6667	24.0379	312.007	104.004	72.1137	72.1137	72.1137	34.6675	72.1137	72.1137	72.1137	72.1137	450	72.1137	34.6675	24.0379	34.6675	16.6667	50	16.6667	16.6667	16.6667	16.6667
A482	24.0379	34.6675	24.0379	24.0379	34.6675	72.1137	50	450	72.1137	150	104.002	450	50	34.6675	34.6675	50	104.004	72.1137	104.002	104.002	50	50	50	16.6667	450	16.6667	450	150	50	150	50	16.6667	16.6667	16.6667	72.1137	24.0379
A483	72.1137	50	24.0379	16.6667	24.0379	72.1137	50	312.007	16.6667	104.002	72.1137	450	24.0379	34.6675	34.6675	104.002	216.337	50	72.1137	72.1137	24.0379	50	50	50	450	50	450	104.002	24.0379	104.002	16.6667	50	50	72.1137	72.1137	50
I484	34.6675	72.1137	50	216.341	216.341	16.6667	24.0379	16.6667	34.6675	16.6667	72.1137	24.0379	16.6667	16.6667	24.0379	16.6667	16.6667	34.6675	72.1137	72.1137	72.1137	104.002	72.1137	16.6667	16.6667	24.0379	24.0379	150	16.6667	16.6667	16.6667	16.6667	34.6675	24.0379	34.6675	16.6667
A485	50	16.6667	34.6675	450	312.007	24.0379	16.6667	24.0379	34.6675	50	34.6675	34.6675	24.0379	24.0379	50	34.6675	16.6667	50	34.6675	34.6675	50	16.6667	16.6667	16.6667	34.6675	312.007	34.6675	50	24.0379	50	16.6667	34.6675	50	16.6667	34.6675	50
I486	24.0379	24.0379	34.6675	16.6667	16.6667	34.6675	24.0379	24.0379	24.0379	24.0379	16.6667	24.0379	24.0379	34.6675	16.6667	16.6667	72.1125	50	16.6667	16.6667	16.6667	24.0379	24.0379	24.0379	24.0379	450	24.0379	24.0379	150	24.0379	16.6667	34.6675	24.0379	24.0379	24.0379	16.6667
A487	50	24.0379	16.6667	16.6667	24.0379	34.6675	34.6675	72.1137	16.6667	150	72.1137	72.1137	34.6675	24.0379	50	150	72.1125	34.6675	72.1137	72.1137	50	34.6675	16.6667	34.6675	72.1137	34.6675	72.1137	150	50	150	50	34.6675	24.0379	34.6675	104.002	34.6675
I488	104.002	34.6675	24.0379	50	34.6675	72.1137	16.6667	16.6667	24.0379	50	24.0379	104.002	50	24.0379	104.002	104.002	34.6681	150	24.0379	24.0379	16.6667	16.6667	50	50	16.6667	104.002	104.002	104.002	50	50	34.6675	216.341	450	50	50	50
A489	72.1137	34.6675	24.0379	50	34.6675	24.0379	104.002	216.341	72.1137	216.341	72.1137	150	312.007	150	150	16.6667	216.337	150	72.1137	72.1137	72.1137	104.002	104.002	104.002	150	72.1137	150	216.341	24.0379	216.341	72.1137	72.1137	312.007	312.007	216.341	216.341
A490	24.0379	24.0379	24.0379	34.6675	16.6667	50	72.1137	50	34.6675	16.6667	24.0379	16.6667	72.1137	216.341	150	312.007	50	24.0379	34.6675	34.6675	104.002	72.1137	72.1137	16.6667	16.6667	16.6667	16.6667	16.6667	16.6667	16.6667	150	216.341	16.6667	216.341	50	216.341
I491	16.6667	24.0379	16.6667	216.341	50	24.0379	104.002	16.6667	24.0379	24.0379	104.002	16.6667	16.6667	34.6675	50	34.6675	50	24.0379	104.002	24.0379	24.0379	104.002	104.002	72.1137	24.0379	16.6667	16.6667	34.6675	24.0379	24.0379	24.0379	72.1137	24.0379	24.0379	24.0379	50
I492	150	24.0379	16.6667	72.1137	16.6667	24.0379	34.6675	16.6667	34.6675	50	50	50	24.0379	50	72.1137	72.1137	16.6667	72.1137	50	16.6667	16.6667	50	34.6675	72.1137	34.6675	50	50	216.341	50	50	34.6675	24.0379	24.0379	24.0379	34.6675	16.6667
I493	16.6667	72.1137	50	104.002	216.341	312.007	16.6667	16.6667	34.6675	34.6675	34.6675	16.6667	24.0379	24.0379	16.6667	16.6667	24.0375	16.6667	50	34.6675	16.6667	450	16.6667	50	24.0379	16.6667	16.6667	50	34.6675	34.6675	24.0379	16.6667	34.6675	24.0379	16.6667	50
A494	16.6667	16.6667	16.6667	16.6667	16.6667	72.1137	34.6675	50	16.6667	34.6675	72.1137	24.0379	72.1137	16.6667	72.1137	216.341	72.1125	34.6675	72.1137	72.1137	24.0379	34.6675	34.6675	34.6675	24.0379	24.0379	16.6667	34.6675	34.6675	16.6667	72.1137	16.6667	24.0379	24.0379	104.002	16.6667
A495	24.0379	24.0379	50	16.6667	34.6675	50	50	150	34.6675	72.1137	24.0379	104.002	72.1137	24.0379	24.0379	50	50	216.341	24.0379	24.0379	216.341	24.0379	50	16.6667	104.002	72.1137	104.002	72.1137	104.002	72.1137	16.6667	24.0379	216.341	104.002	50	16.6667
I496	216.341	50	104.002	50	34.6675	34.6675	50	16.6667	16.6667	104.002	72.1137	450	72.1137	16.6667	72.1137	104.002	50	24.0379	72.1137	72.1137	72.1137	50	50	72.1137	450	34.6675	450	104.002	16.6667	104.002	34.6675	72.1137	34.6675	34.6675	34.6675	34.6675
I497	16.6667	104.002	50	16.6667	16.6667	312.007	16.6667	24.0379	34.6675	24.0379	16.6667	16.6667	24.0379	16.6667	16.6667	16.6667	34.6681	24.0379	16.6667	16.6667	16.6667	16.6667	16.6667	16.6667	16.6667	16.6667	24.0379	24.0379	24.0379	24.0379	34.6675	34.6675	34.6675	34.6675	16.6667	72.1137
I498	34.6675	16.6667	50	72.1137	16.6667	24.0379	24.0379	24.0379	450	34.6675	50	16.6667	24.0379	24.0379	34.6675	104.002	34.6681	50	50	50	50	24.0379	104.002	34.6675	16.6667	16.6667	24.0379	34.6675	34.6675	104.002	16.6667	24.0379	16.6667	50	72.1137	16.6667
A499	34.6675	24.0379	150	50	34.6675	50	50	150	50	72.1137	24.0379	72.1137	104.002	50	24.0379	150	50	104.002	24.0379	24.0379	450	50	50	104.002	72.1137	72.1137	72.1137	72.1137	72.1137	72.1137	72.1137	34.6675	450	216.341	24.0379	104.002
A500	24.0379	72.1137	24.0379	34.6675	24.0379	34.6675	34.6675	50	16.6667	24.0379	24.0379	50	72.1137	150	312.007	104.002	24.0375	50	34.6675	24.0379	24.0379	34.6675	34.6675	34.6675	50	50	34.6675	24.0379	24.0379	24.0379	216.341	312.007	72.1137	216.341	34.6675	312.007
I501	16.6667	24.0379	34.6675	34.6675	24.0379	16.6667	16.6667	72.1137	50	50	16.6667	24.0379	24.0379	72.1137	72.1137	34.6675	16.6667	216.341	16.6667	16.6667	16.6667	16.6667	16.6667	450	24.0379	24.0379	16.6667	50	50	150	34.6675	16.6667	50	34.6675	24.0379	50
A502	16.6667	150	34.6675	16.6667	16.6667	150	24.0379	24.0379	16.6667	104.002	16.6667	16.6667	16.6667	72.1137	16.6667	34.6675	34.6681	34.6675	16.6667	16.6667	24.0379	24.0379	24.0379	24.0379	16.6667	16.6667	24.0379	104.002	104.002	72.1137	50	34.6675	24.0379	16.6667	34.6675	24.0379
A503	16.6667	104.002	24.0379	34.6675	24.0379	16.6667	24.0379	72.1137	34.6675	24.0379	16.6667	24.0379	16.6667	50	16.6667	16.6667	16.6667	34.6675	16.6667	16.6667	16.6667	24.0379	24.0379	24.0379	24.0379	24.0379	50	24.0379	24.0379	34.6675	16.6667	16.6667	34.6675	24.0379	24.0379	24.0379
A504	104.002	72.1137	34.6675	24.0379	72.1137	104.002	16.6667	34.6675	24.0379	34.6675	104.002	50	24.0379	24.0379	24.0379	16.6667	16.6667	16.6667	104.002	16.6667	104.002	16.6667	16.6667	16.6667	24.0379	50	50	216.341	34.6675	34.6675	50	16.6667	50	24.0379	16.6667	50
A505	16.6667	104.002	24.0379	34.6675	104.002	16.6667	24.0379	50	216.341	24.0379	16.6667	24.0379	16.6667	24.0379	24.0379	16.6667	16.6667	34.6675	16.6667	16.6667	34.6675	24.0379	24.0379	16.6667	24.0379	24.0379	16.6667	24.0379	24.0379	34.6675	16.6667	16.6667	50	16.6667	34.6675	50
A506	16.6667	450	24.0379	34.6675	24.0379	16.6667	16.6667	72.1137	50	104.002	16.6667	24.0379	24.0379	72.1137	104.002	16.6667	24.0375	72.1137	24.0379	16.6667	16.6667	16.6667	16.6667	50	24.0379	24.0379	34.6675	104.002	104.002	72.1137	50	24.0379	16.6667	34.6675	16.6667	16.6667
A507	24.0379	450	24.0379	34.6675	24.0379	50	16.6667	50	104.002	16.6667	16.6667	50	16.6667	104.002	72.1137	216.341	50	34.6675	16.6667	34.6675	16.6667	16.6667	16.6667	16.6667	50	50	24.0379	16.6667	16.6667	24.0379	72.1137	216.341	104.002	150	24.0379	216.341
A508	24.0379	24.0379	24.0379	16.6667	16.6667	34.6675	72.1137	104.002	16.6667	24.0379	24.0379	216.341	34.6675	24.0379	72.1137	50	24.0375	72.1137	24.0379	16.6667	34.6675	72.1137	72.1137	216.341	216.341	24.0379	216.341	24.0379	34.6675	24.0379	24.0379	16.6667	450	150	24.0379	72.1137
A509	16.6667	16.6667	16.6667	104.002	34.6675	34.6675	104.002	16.6667	24.0379	24.0379	312.007	16.6667	50	24.0379	34.6675	50	16.6667	24.0379	50	312.007	312.007	104.002	104.002	34.6675	16.6667	16.6667	16.6667	50	24.0379	24.0379	16.6667	16.6667	16.6667	50	104.002	24.0379
A510	50	16.6667	16.6667	16.6667	34.6675	24.0379	34.6675	104.002	16.6667	72.1137	50	16.6667	34.6675	24.0379	24.0379	104.002	150	216.341	24.0379	450	104.002	34.6675	34.6675	34.6675	16.6667	216.341	16.6667	72.1137	216.341	72.1137	24.0379	72.1137	50	50	16.6667	50
A511	34.6675	24.0379	16.6667	16.6667	24.0379	50	34.6675	72.1137	72.1137	24.0379	16.6667	16.6667	34.6675	150	104.002	104.002	34.6681	34.6675	16.6667	16.6667	24.0379	34.6675	34.6675	34.6675	16.6667	16.6667	34.6675	24.0379	24.0379	16.6667	16.6667	104.002	216.341	104.002	24.0379	104.002
I512	24.0379	16.6667	16.6667	104.002	16.6667	50	16.6667	16.6667	104.002	50	24.0379	16.6667	24.0379	16.6667	34.6675	16.6667	16.6667	16.6667	24.0379	24.0379	16.6667	16.6667	16.6667	16.6667	16.6667	16.6667	34.6675	50	50	34.6675	16.6667	24.0379	24.0379	16.6667	34.6675	16.6667
I513	24.0379	24.0379	72.1137	16.6667	16.6667	104.002	16.6667	34.6675	16.6667	34.6675	16.6667	16.6667	50	24.0379	16.6667	50	16.6667	72.1137	16.6667	16.6667	16.6667	16.6667	16.6667	16.6667	16.6667	16.6667	34.6675	34.6675	34.6675	16.6667	72.1137	16.6667	16.6667	16.6667	16.6667	16.6667
A514	16.6667	16.6667	34.6675	72.1137	216.341	16.6667	50	16.6667	24.0379	34.6675	216.341	16.6667	24.0379	50	16.6667	34.6675	16.6667	16.6667	216.341	216.341	24.0379	50	50	50	34.6675	16.6667	16.6667	216.341	34.6675	34.6675	24.0379	34.6675	24.0379	16.6667	24.0379	16.6667
I515	72.1137	50	50	50	34.6675	34.6675	34.6675	34.6675	16.6667	24.0379	50	34.6675	104.002	312.007	104.002	34.6675	24.0375	16.6667	72.1137	50	50	34.6675	34.6675	24.0379	34.6675	34.6675	50	24.0379	24.0379	24.0379	216.341	72.1137	312.007	16.6667	150	150
A516	24.0379	16.6667	150	50	24.0379	24.0379	216.341	216.341	72.1137	104.002	72.1137	312.007	150	104.002	216.341	72.1137	216.337	216.341	24.0379	72.1137	72.1137	216.341	216.341	34.6675	312.007	50	312.007	104.002	24.0379	104.002	150	150	312.007	450	216.341	150
I517	16.6667	50	16.6667	24.0379	24.0379	24.0379	16.6667	34.6675	104.002	24.0379	34.6675	50	150	16.6667	16.6667	16.6667	16.6667	34.6675	34.6675	34.6675	34.6675	16.6667	16.6667	72.1137	50	16.6667	50	24.0379	16.6667	24.0379	216.341	24.0379	34.6675	34.6675	72.1137	24.0379
A518	24.0379	24.0379	34.6675	24.0379	72.1137	16.6667	50	34.6675	50	34.6675	450	24.0379	104.002	16.6667	24.0379	16.6667	34.6681	16.6667	450	450	450	50	104.002	50	16.6667	24.0379	24.0379	50	34.6675	34.6675	34.6675	24.0379	16.6667	50	16.6667	16.6667
A519	34.6675	24.0379	72.1137	24.0379	150	16.6667	34.6675	16.6667	34.6675	50	450	34.6675	16.6667	24.0379	16.6667	16.6667	24.0375	16.6667	450	150	16.6667	34.6675	16.6667	34.6675	34.6675	34.6675	34.6675	16.6667	50	50	24.0379	34.6675	50	34.6675	34.6675	50
I520	16.6667	216.341	34.6675	16.6667	16.6667	216.341	16.6667	16.6667	34.6675	16.6667	16.6667	16.6667	34.6675	16.6667	16.6667	24.0379	16.6667	16.6667	16.6667	24.0379	16.6667	16.6667	16.6667	16.6667	16.6667	16.6667	24.0379	16.6667	16.6667	72.1137	16.6667	24.0379	34.6675	34.6675	16.6667	24.0379
I521	24.0379	24.0379	50	450	104.002	150	16.6667	16.6667	34.6675	150	24.0379	34.6675	16.6667	16.6667	24.0379	24.0379	16.6667	34.6675	24.0379	24.0379	216.341	16.6667	16.6667	16.6667	34.6675	24.0379	34.6675	150	24.0379	150	34.6675	24.0379	34.6675	34.6675	34.6675	16.6667
A522	104.002	34.6675	24.0379	16.6667	72.1137	50	16.6667	34.6675	24.0379	34.6675	150	24.0379	16.6667	24.0379	16.6667	16.6667	34.6681	16.6667	150	150	150	16.6667	16.6667	16.6667	104.002	24.0379	24.0379	104.002	34.6675	34.6675	16.6667	16.6667	24.0379	24.0379	34.6675	34.6675
I523	312.007	34.6675	16.6667	50	34.6675	34.6675	16.6667	34.6675	216.341	16.6667	24.0379	50	24.0379	72.1137	24.0379	24.0379	50	16.6667	216.341	24.0379	24.0379	16.6667	16.6667	16.6667	50	50	24.0379	16.6667	16.6667	16.6667	50	104.002	24.0379	16.6667	50	72.1137
A524	104.002	72.1137	34.6675	24.0379	72.1137	216.341	16.6667	34.6675	16.6667	104.002	150	34.6675	24.0379	24.0379	16.6667	16.6667	16.6667	16.6667	150	150	150	16.6667	16.6667	16.6667	24.0379	34.6675	34.6675	24.0379	104.002	104.002	16.6667	34.6675	50	16.6667	34.6675	16.6667
I525	72.1137	24.0379	24.0379	24.0379	72.1137	24.0379	24.0379	34.6675	16.6667	50	216.341	24.0379	34.6675	34.6675	16.6667	16.6667	24.0375	16.6667	216.341	72.1137	34.6675	24.0379	24.0379	34.6675	104.002	24.0379	24.0379	16.6667	50	50	24.0379	34.6675	16.6667	16.6667	50	16.6667
I526	24.0379	24.0379	50	16.6667	16.6667	34.6675	16.6667	34.6675	16.6667	24.0379	16.6667	16.6667	24.0379	16.6667	34.6675	50	72.1125	72.1137	16.6667	16.6667	34.6675	16.6667	16.6667	150	16.6667	16.6667	24.0379	24.0379	24.0379	16.6667	104.002	16.6667	24.0379	34.6675	24.0379	34.6675
A527	16.6667	104.002	24.0379	50	104.002	16.6667	16.6667	50	216.341	16.6667	16.6667	34.6675	16.6667	16.6667	16.6667	16.6667	16.6667	24.0379	16.6667	16.6667	16.6667	150	16.6667	16.6667	34.6675	34.6675	16.6667	16.6667	16.6667	24.0379	16.6667	34.6675	24.0379	34.6675	24.0379	16.6667
A528	16.6667	16.6667	16.6667	16.6667	16.6667	16.6667	16.6667	16.6667	16.6667	16.6667	16.6667	16.6667	16.6667	16.6667	16.6667	16.6667	16.6667	16.6667	16.6667	16.6667	16.6667	16.6667	16.6667	16.6667	16.6667	16.6667	16.6667	16.6667	16.6667	16.6667	16.6667	16.6667	16.6667	16.6667	16.6667	16.6667
A529	34.6675	16.6667	16.6667	16.6667	24.0379	50	24.0379	104.002	16.6667	34.6675	50	24.0379	34.6675	16.6667	50	450	312.013	72.1137	50	50	50	24.0379	24.0379	24.0379	24.0379	312.007	24.0379	34.6675	16.6667	34.6675	16.6667	72.1137	34.6675	24.0379	50	16.6667
I530	16.6667	16.6667	24.0379	50	72.1137	16.6667	34.6675	16.6667	24.0379	16.6667	450	24.0379	24.0379	24.0379	50	50	24.0375	24.0379	150	450	450	34.6675	24.0379	34.6675	34.6675	24.0379	24.0379	34.6675	16.6667	16.6667	34.6675	24.0379	24.0379	50	34.6675	34.6675
A531	34.6675	16.6667	24.0379	34.6675	50	16.6667	34.6675	16.6667	34.6675	50	450	34.6675	16.6667	72.1137	34.6675	24.0379	16.6667	24.0379	450	104.002	450	34.6675	34.6675	34.6675	16.6667	34.6675	34.6675	104.002	50	50	16.6667	16.6667	16.6667	50	16.6667	34.6675
I532	16.6667	16.6667	72.1137	72.1137	50	16.6667	24.0379	16.6667	16.6667	16.6667	450	16.6667	34.6675	24.0379	50	72.1137	16.6667	16.6667	450	450	34.6675	24.0379	24.0379	24.0379	150	16.6667	16.6667	16.6667	16.6667	16.6667	16.6667	24.0379	24.0379	16.6667	16.6667	50
A533	16.6667	16.6667	24.0379	72.1137	34.6675	16.6667	24.0379	16.6667	24.0379	104.002	450	24.0379	16.6667	24.0379	50	150	24.0375	34.6675	16.6667	450	450	24.0379	24.0379	16.6667	16.6667	24.0379	24.0379	16.6667	104.002	104.002	24.0379	34.6675	24.0379	16.6667	24.0379	24.0379
A534	150	150	24.0379	34.6675	50	50	24.0379	24.0379	50	150	34.6675	50	72.1137	150	72.1137	16.6667	24.0375	104.002	34.6675	16.6667	34.6675	24.0379	24.0379	34.6675	34.6675	50	50	50	150	150	72.1137	216.341	150	104.002	72.1137	24.0379
A535	24.0379	24.0379	24.0379	16.6667	24.0379	50	72.1137	104.002	16.6667	24.0379	24.0379	104.002	50	72.1137	72.1137	50	34.6681	216.341	24.0379	24.0379	150	24.0379	34.6675	72.1137	104.002	34.6675	104.002	24.0379	24.0379	24.0379	16.6667	24.0379	216.341	104.002	24.0379	72.1137
A536	104.002	34.6675	24.0379	16.6667	216.341	24.0379	16.6667	34.6675	24.0379	16.6667	150	34.6675	34.6675	16.6667	16.6667	16.6667	34.6681	16.6667	150	24.0379	150	16.6667	16.6667	24.0379	34.6675	150	34.6675	16.6667	104.002	16.6667	16.6667	24.0379	16.6667	16.6667	24.0379	24.0379
I537	34.6675	16.6667	16.6667	16.6667	16.6667	24.0379	16.6667	24.0379	24.0379	16.6667	24.0379	24.0379	34.6675	16.6667	50	72.1137	34.6681	104.002	24.0379	24.0379	24.0379	16.6667	104.002	16.6667	24.0379	150	24.0379	16.6667	34.6675	16.6667	16.6667	16.6667	16.6667	50	34.6675	34.6675
I538	34.6675	24.0379	24.0379	16.6667	24.0379	16.6667	16.6667	24.0379	16.6667	34.6675	50	50	72.1137	24.0379	34.6675	104.002	216.337	216.341	50	50	34.6675	16.6667	34.6675	16.6667	50	50	50	34.6675	16.6667	34.6675	104.002	16.6667	16.6667	50	72.1137	16.6667
A539	16.6667	16.6667	16.6667	16.6667	16.6667	16.6667	16.6667	16.6667	16.6667	16.6667	16.6667	16.6667	16.6667	16.6667	16.6667	16.6667	16.6667	16.6667	16.6667	16.6667	16.6667	16.6667	16.6667	16.6667	16.6667	16.6667	16.6667	16.6667	16.6667	16.6667	16.6667	16.6667	16.6667	16.6667	16.6667	16.6667
A540	16.6667	104.002	24.0379	34.6675	72.1137	16.6667	16.6667	72.1137	104.002	16.6667	16.6667	24.0379	16.6667	24.0379	16.6667	16.6667	16.6667	24.0379	72.1137	34.6675	16.6667	16.6667	16.6667	16.6667	24.0379	24.0379	16.6667	16.6667	16.6667	16.6667	24.0379	50	24.0379	16.6667	34.6675	24.0379
A541	16.6667	24.0379	72.1137	150	150	16.6667	24.0379	16.6667	24.0379	16.6667	216.341	16.6667	16.6667	16.6667	24.0379	50	16.6667	34.6675	216.341	16.6667	16.6667	24.0379	50	24.0379	16.6667	16.6667	16.6667	16.6667	16.6667	16.6667	24.0379	16.6667	24.0379	16.6667	16.6667	34.6675
A542	34.6675	16.6667	24.0379	16.6667	16.6667	34.6675	24.0379	50	16.6667	50	50	16.6667	72.1137	16.6667	150	16.6667	24.0375	16.6667	24.0379	50	50	24.0379	24.0379	24.0379	16.6667	16.6667	24.0379	50	50	216.341	104.002	16.6667	72.1137	72.1137	216.341	104.002
A543	50	16.6667	16.6667	16.6667	16.6667	24.0379	16.6667	104.002	24.0379	16.6667	16.6667	150	34.6675	72.1137	16.6667	104.002	50	104.002	16.6667	16.6667	16.6667	312.007	16.6667	150	150	450	150	16.6667	216.341	16.6667	24.0379	24.0379	24.0379	34.6675	24.0379	50
A544	16.6667	16.6667	16.6667	16.6667	16.6667	16.6667	16.6667	16.6667	16.6667	16.6667	16.6667	16.6667	16.6667	16.6667	16.6667	16.6667	16.6667	16.6667	16.6667	16.6667	16.6667	16.6667	16.6667	16.6667	16.6667	16.6667	16.6667	16.6667	16.6667	16.6667	16.6667	16.6667	16.6667	16.6667	16.6667	16.6667
A545	16.6667	72.1137	104.002	216.341	450	16.6667	34.6675	16.6667	24.0379	24.0379	312.007	16.6667	34.6675	34.6675	16.6667	34.6675	16.6667	24.0379	16.6667	312.007	312.007	16.6667	24.0379	34.6675	24.0379	16.6667	16.6667	16.6667	24.0379	24.0379	34.6675	24.0379	16.6667	16.6667	50	34.6675
A546	104.002	72.1137	34.6675	24.0379	72.1137	150	16.6667	34.6675	24.0379	34.6675	104.002	50	16.6667	24.0379	24.0379	16.6667	16.6667	16.6667	104.002	104.002	50	16.6667	34.6675	16.6667	24.0379	50	50	104.002	34.6675	34.6675	50	24.0379	24.0379	34.6675	16.6667	50
A547	72.1137	216.341	150	16.6667	34.6675	34.6675	16.6667	104.002	24.0379	24.0379	50	34.6675	24.0379	104.002	150	450	72.1125	34.6675	50	50	24.0379	16.6667	16.6667	72.1137	34.6675	104.002	34.6675	24.0379	16.6667	24.0379	50	72.1137	16.6667	16.6667	16.6667	24.0379
A548	34.6675	16.6667	24.0379	24.0379	72.1137	16.6667	16.6667	34.6675	16.6667	72.1137	50	24.0379	24.0379	34.6675	24.0379	24.0379	16.6667	16.6667	312.007	50	50	16.6667	72.1137	16.6667	72.1137	24.0379	24.0379	16.6667	72.1137	72.1137	16.6667	34.6675	50	34.6675	50	34.6675
A549	312.007	104.002	150	34.6675	24.0379	34.6675	16.6667	104.002	24.0379	16.6667	34.6675	16.6667	50	312.007	150	450	216.337	104.002	24.0379	34.6675	50	16.6667	16.6667	16.6667	16.6667	450	16.6667	16.6667	50	16.6667	50	72.1137	34.6675	24.0379	104.002	50
A550	16.6667	16.6667	24.0379	24.0379	24.0379	16.6667	16.6667	34.6675	24.0379	50	50	50	16.6667	50	24.0379	16.6667	16.6667	24.0379	50	50	216.341	50	16.6667	16.6667	50	72.1137	50	50	34.6675	50	34.6675	24.0379	34.6675	24.0379	24.0379	72.1137
A551	16.6667	50	24.0379	50	34.6675	104.002	72.1137	34.6675	24.0379	24.0379	104.002	50	216.341	16.6667	16.6667	104.002	72.1125	34.6675	16.6667	16.6667	72.1137	72.1137	72.1137	72.1137	34.6675	50	50	34.6675	24.0379	24.0379	72.1137	150	24.0379	72.1137	104.002	72.1137
A552	16.6667	312.007	34.6675	34.6675	50	16.6667	16.6667	72.1137	450	72.1137	16.6667	16.6667	16.6667	16.6667	50	16.6667	24.0375	50	16.6667	16.6667	16.6667	16.6667	72.1137	24.0379	16.6667	16.6667	24.0379	72.1137	72.1137	16.6667	16.6667	16.6667	24.0379	16.6667	24.0379	16.6667
A553	150	216.341	24.0379	24.0379	150	150	16.6667	50	24.0379	16.6667	104.002	50	24.0379	24.0379	16.6667	16.6667	24.0375	16.6667	104.002	104.002	104.002	16.6667	16.6667	16.6667	16.6667	50	50	34.6675	16.6667	16.6667	16.6667	34.6675	34.6675	34.6675	34.6675	16.6667
A554	16.6667	72.1137	16.6667	34.6675	34.6675	50	16.6667	34.6675	104.002	24.0379	16.6667	50	216.341	24.0379	50	50	50	34.6675	16.6667	16.6667	16.6667	16.6667	16.6667	16.6667	50	34.6675	50	24.0379	34.6675	24.0379	312.007	72.1137	16.6667	24.0379	24.0379	16.6667
A555	16.6667	16.6667	24.0379	16.6667	24.0379	34.6675	16.6667	216.341	72.1137	50	34.6675	104.002	16.6667	34.6675	24.0379	16.6667	50	50	34.6675	16.6667	34.6675	16.6667	16.6667	16.6667	104.002	72.1137	104.002	50	34.6675	50	16.6667	24.0379	34.6675	16.6667	16.6667	16.6667
A556	16.6667	24.0379	50	72.1137	450	16.6667	34.6675	16.6667	50	16.6667	450	34.6675	16.6667	16.6667	16.6667	16.6667	34.6681	16.6667	450	34.6675	450	34.6675	16.6667	24.0379	16.6667	34.6675	34.6675	50	16.6667	16.6667	16.6667	34.6675	24.0379	16.6667	34.6675	50
A557	34.6675	16.6667	24.0379	24.0379	72.1137	16.6667	24.0379	34.6675	16.6667	50	450	34.6675	24.0379	16.6667	16.6667	16.6667	16.6667	16.6667	450	50	34.6675	24.0379	24.0379	24.0379	50	34.6675	34.6675	450	50	50	50	34.6675	34.6675	16.6667	16.6667	24.0379
A558	104.002	50	150	34.6675	24.0379	50	24.0379	50	216.341	16.6667	16.6667	34.6675	104.002	312.007	72.1137	34.6675	104.004	50	16.6667	16.6667	72.1137	24.0379	24.0379	24.0379	34.6675	34.6675	24.0379	16.6667	16.6667	34.6675	312.007	150	104.002	312.007	16.6667	450
A559	150	150	104.002	50	24.0379	34.6675	34.6675	50	104.002	16.6667	24.0379	34.6675	450	312.007	72.1137	34.6675	104.004	50	24.0379	24.0379	16.6667	34.6675	50	16.6667	34.6675	34.6675	24.0379	16.6667	16.6667	72.1137	450	104.002	216.341	450	72.1137	312.007
A560	34.6675	16.6667	72.1137	16.6667	16.6667	24.0379	24.0379	34.6675	16.6667	24.0379	34.6675	16.6667	50	24.0379	24.0379	72.1137	50	216.341	34.6675	34.6675	72.1137	24.0379	24.0379	24.0379	16.6667	16.6667	16.6667	24.0379	24.0379	72.1137	216.341	34.6675	50	16.6667	16.6667	16.6667
A561	24.0379	16.6667	16.6667	50	50	16.6667	50	16.6667	24.0379	50	216.341	16.6667	16.6667	24.0379	24.0379	24.0379	24.0375	16.6667	216.341	216.341	150	16.6667	50	24.0379	16.6667	16.6667	16.6667	16.6667	50	50	16.6667	50	72.1137	72.1137	72.1137	72.1137
I562	24.0379	24.0379	50	16.6667	34.6675	34.6675	16.6667	24.0379	34.6675	24.0379	16.6667	16.6667	24.0379	50	34.6675	34.6675	34.6681	34.6675	16.6667	16.6667	16.6667	16.6667	16.6667	16.6667	16.6667	104.002	16.6667	24.0379	104.002	24.0379	16.6667	16.6667	34.6675	24.0379	34.6675	16.6667
I563	104.002	450	34.6675	24.0379	72.1137	450	16.6667	34.6675	24.0379	50	150	50	34.6675	16.6667	16.6667	16.6667	16.6667	16.6667	150	150	16.6667	50	24.0379	16.6667	16.6667	50	50	50	50	50	16.6667	34.6675	34.6675	34.6675	24.0379	50
A564	24.0379	16.6667	150	72.1137	50	50	104.002	216.341	72.1137	50	34.6675	104.002	150	150	72.1137	34.6675	104.004	150	34.6675	34.6675	50	24.0379	104.002	104.002	104.002	72.1137	104.002	50	24.0379	50	450	312.007	16.6667	72.1137	16.6667	104.002
I565	24.0379	150	50	150	150	216.341	16.6667	16.6667	34.6675	34.6675	24.0379	16.6667	24.0379	24.0379	34.6675	16.6667	16.6667	16.6667	24.0379	24.0379	150	16.6667	16.6667	24.0379	72.1137	16.6667	16.6667	34.6675	34.6675	34.6675	24.0379	50	50	24.0379	16.6667	16.6667
A566	150	50	16.6667	24.0379	24.0379	24.0379	104.002	50	16.6667	16.6667	72.1137	150	34.6675	24.0379	24.0379	72.1137	150	72.1137	72.1137	50	72.1137	104.002	104.002	104.002	150	24.0379	150	16.6667	72.1137	16.6667	16.6667	24.0379	50	72.1137	24.0379	24.0379
A567	16.6667	72.1137	24.0379	34.6675	72.1137	24.0379	16.6667	72.1137	150	16.6667	16.6667	16.6667	16.6667	34.6675	24.0379	16.6667	16.6667	24.0379	24.0379	16.6667	50	16.6667	34.6675	16.6667	16.6667	16.6667	24.0379	16.6667	16.6667	72.1137	50	24.0379	34.6675	16.6667	16.6667	24.0379
I568	216.341	150	24.0379	34.6675	34.6675	104.002	16.6667	24.0379	34.6675	34.6675	24.0379	72.1137	150	450	50	34.6675	72.1125	216.341	24.0379	24.0379	24.0379	16.6667	16.6667	50	50	72.1137	72.1137	150	34.6675	34.6675	16.6667	312.007	34.6675	16.6667	72.1137	34.6675
A569	34.6675	16.6667	16.6667	16.6667	72.1137	16.6667	72.1137	50	104.002	50	16.6667	16.6667	16.6667	34.6675	16.6667	16.6667	16.6667	50	16.6667	16.6667	16.6667	72.1137	16.6667	24.0379	16.6667	16.6667	16.6667	50	50	50	16.6667	24.0379	34.6675	16.6667	24.0379	34.6675
I570	24.0379	104.002	50	312.007	312.007	312.007	16.6667	16.6667	34.6675	72.1137	104.002	16.6667	16.6667	16.6667	24.0379	24.0379	16.6667	16.6667	24.0379	104.002	104.002	16.6667	16.6667	216.341	24.0379	16.6667	16.6667	24.0379	72.1137	72.1137	16.6667	24.0379	50	24.0379	16.6667	24.0379
A571	50	150	72.1137	34.6675	34.6675	34.6675	34.6675	72.1137	16.6667	16.6667	24.0379	34.6675	312.007	216.341	104.002	50	150	72.1137	16.6667	24.0379	24.0379	150	34.6675	34.6675	34.6675	34.6675	34.6675	16.6667	16.6667	50	150	72.1137	72.1137	150	72.1137	104.002
A572	72.1137	50	104.002	34.6675	34.6675	50	104.002	150	16.6667	50	72.1137	450	16.6667	16.6667	34.6675	72.1137	104.004	24.0379	16.6667	24.0379	50	104.002	24.0379	34.6675	450	150	450	50	16.6667	50	24.0379	16.6667	16.6667	72.1137	72.1137	50
I573	16.6667	72.1137	34.6675	16.6667	24.0379	16.6667	16.6667	50	16.6667	16.6667	16.6667	50	34.6675	24.0379	24.0379	16.6667	24.0375	24.0379	16.6667	16.6667	16.6667	16.6667	16.6667	16.6667	50	50	24.0379	16.6667	16.6667	50	16.6667	16.6667	24.0379	16.6667	50	50
A574	72.1137	24.0379	16.6667	104.002	72.1137	16.6667	34.6675	16.6667	50	34.6675	450	16.6667	24.0379	50	34.6675	16.6667	16.6667	16.6667	450	312.007	24.0379	34.6675	104.002	312.007	24.0379	16.6667	16.6667	216.341	34.6675	34.6675	16.6667	16.6667	24.0379	50	34.6675	16.6667
A575	16.6667	104.002	24.0379	34.6675	150	24.0379	24.0379	50	104.002	16.6667	16.6667	24.0379	34.6675	16.6667	16.6667	16.6667	16.6667	24.0379	16.6667	16.6667	16.6667	24.0379	150	24.0379	24.0379	24.0379	24.0379	16.6667	16.6667	50	16.6667	16.6667	24.0379	24.0379	24.0379	16.6667
A576	34.6675	50	16.6667	34.6675	16.6667	34.6675	34.6675	50	24.0379	24.0379	16.6667	16.6667	50	450	150	104.002	24.0375	50	16.6667	16.6667	16.6667	34.6675	34.6675	50	16.6667	16.6667	34.6675	24.0379	24.0379	24.0379	104.002	216.341	104.002	312.007	16.6667	450
I577	216.341	16.6667	16.6667	24.0379	16.6667	24.0379	24.0379	24.0379	216.341	16.6667	24.0379	50	50	34.6675	34.6675	24.0379	16.6667	24.0379	24.0379	24.0379	16.6667	24.0379	24.0379	34.6675	50	50	50	16.6667	16.6667	16.6667	50	16.6667	16.6667	72.1137	16.6667	16.6667
A578	34.6675	34.6675	16.6667	104.002	72.1137	50	24.0379	24.0379	34.6675	216.341	24.0379	24.0379	34.6675	216.341	312.007	34.6675	50	150	24.0379	24.0379	24.0379	24.0379	24.0379	24.0379	24.0379	24.0379	24.0379	150	216.341	216.341	150	150	104.002	150	104.002	72.1137
A579	16.6667	450	24.0379	16.6667	34.6675	16.6667	16.6667	150	16.6667	104.002	34.6675	34.6675	34.6675	50	16.6667	16.6667	34.6681	24.0379	34.6675	34.6675	16.6667	16.6667	16.6667	34.6675	34.6675	50	34.6675	104.002	34.6675	104.002	34.6675	16.6667	24.0379	24.0379	24.0379	24.0379
A580	24.0379	150	34.6675	24.0379	24.0379	34.6675	24.0379	72.1137	50	16.6667	24.0379	34.6675	104.002	450	104.002	104.002	104.004	50	24.0379	24.0379	24.0379	16.6667	24.0379	24.0379	34.6675	34.6675	16.6667	16.6667	16.6667	16.6667	216.341	104.002	72.1137	216.341	34.6675	104.002
I581	16.6667	50	16.6667	312.007	16.6667	34.6675	16.6667	34.6675	104.002	16.6667	16.6667	24.0379	34.6675	72.1137	16.6667	34.6675	16.6667	16.6667	16.6667	16.6667	16.6667	16.6667	16.6667	16.6667	24.0379	24.0379	16.6667	16.6667	16.6667	104.002	34.6675	16.6667	72.1137	34.6675	50	50
A582	72.1137	34.6675	150	34.6675	34.6675	34.6675	34.6675	50	16.6667	16.6667	24.0379	34.6675	104.002	450	104.002	34.6675	104.004	450	24.0379	34.6675	24.0379	34.6675	72.1137	34.6675	34.6675	34.6675	16.6667	16.6667	16.6667	24.0379	312.007	16.6667	104.002	72.1137	450	104.002
A583	24.0379	16.6667	50	16.6667	24.0379	24.0379	16.6667	50	216.341	34.6675	16.6667	16.6667	16.6667	24.0379	34.6675	72.1137	24.0375	24.0379	16.6667	16.6667	16.6667	16.6667	16.6667	50	16.6667	16.6667	34.6675	34.6675	34.6675	72.1137	16.6667	24.0379	72.1137	34.6675	16.6667	34.6675
I584	16.6667	34.6675	16.6667	16.6667	24.0379	24.0379	16.6667	34.6675	104.002	24.0379	24.0379	312.007	72.1137	16.6667	16.6667	16.6667	72.1125	34.6675	24.0379	16.6667	24.0379	34.6675	16.6667	72.1137	312.007	312.007	312.007	24.0379	34.6675	24.0379	104.002	24.0379	50	24.0379	72.1137	24.0379
A585	72.1137	216.341	24.0379	16.6667	24.0379	16.6667	16.6667	450	16.6667	216.341	34.6675	50	50	16.6667	24.0379	16.6667	34.6681	16.6667	34.6675	34.6675	34.6675	16.6667	34.6675	24.0379	50	34.6675	50	216.341	72.1137	216.341	24.0379	50	50	16.6667	34.6675	16.6667
I586	50	24.0379	24.0379	104.002	16.6667	24.0379	16.6667	16.6667	24.0379	16.6667	72.1137	34.6675	16.6667	34.6675	16.6667	16.6667	24.0375	312.007	34.6675	72.1137	50	16.6667	16.6667	16.6667	72.1137	34.6675	34.6675	150	16.6667	16.6667	24.0379	34.6675	50	24.0379	24.0379	24.0379
A587	16.6667	24.0379	34.6675	24.0379	24.0379	16.6667	24.0379	312.007	16.6667	16.6667	24.0379	34.6675	16.6667	50	50	24.0379	34.6681	16.6667	16.6667	24.0379	16.6667	24.0379	24.0379	34.6675	34.6675	104.002	34.6675	16.6667	16.6667	16.6667	16.6667	34.6675	34.6675	16.6667	16.6667	16.6667
A588	216.341	50	104.002	34.6675	16.6667	34.6675	24.0379	72.1137	16.6667	104.002	50	34.6675	50	34.6675	216.341	216.341	50	24.0379	16.6667	50	50	24.0379	50	16.6667	34.6675	50	34.6675	104.002	24.0379	104.002	34.6675	24.0379	104.002	34.6675	16.6667	16.6667
A589	16.6667	72.1137	16.6667	16.6667	216.341	16.6667	34.6675	50	104.002	24.0379	16.6667	16.6667	24.0379	34.6675	16.6667	16.6667	24.0375	34.6675	16.6667	16.6667	50	34.6675	34.6675	34.6675	16.6667	16.6667	34.6675	24.0379	24.0379	16.6667	16.6667	16.6667	24.0379	16.6667	16.6667	16.6667
I590	16.6667	16.6667	16.6667	16.6667	24.0379	72.1137	72.1137	450	16.6667	150	72.1137	216.341	24.0379	24.0379	24.0379	216.341	216.337	50	72.1137	34.6675	72.1137	72.1137	72.1137	72.1137	216.341	72.1137	216.341	150	24.0379	150	34.6675	34.6675	16.6667	16.6667	24.0379	24.0379
A591	50	34.6675	104.002	24.0379	24.0379	34.6675	24.0379	104.002	24.0379	16.6667	24.0379	24.0379	104.002	450	216.341	50	450	104.002	24.0379	24.0379	24.0379	24.0379	24.0379	24.0379	24.0379	24.0379	24.0379	16.6667	16.6667	50	150	34.6675	34.6675	24.0379	150	24.0379
I592	72.1137	24.0379	24.0379	50	24.0379	72.1137	72.1137	312.007	34.6675	72.1137	50	50	150	216.341	216.341	24.0379	150	104.002	50	50	72.1137	16.6667	72.1137	16.6667	50	150	50	72.1137	34.6675	72.1137	312.007	72.1137	216.341	312.007	216.341	312.007
A593	16.6667	72.1137	34.6675	24.0379	24.0379	16.6667	24.0379	312.007	16.6667	24.0379	24.0379	50	34.6675	24.0379	24.0379	16.6667	16.6667	16.6667	24.0379	34.6675	24.0379	24.0379	24.0379	50	50	50	50	24.0379	24.0379	24.0379	24.0379	24.0379	16.6667	24.0379	34.6675	24.0379
I594	34.6675	16.6667	72.1137	104.002	16.6667	24.0379	16.6667	24.0379	150	34.6675	34.6675	16.6667	24.0379	34.6675	16.6667	104.002	16.6667	24.0379	34.6675	16.6667	104.002	16.6667	16.6667	72.1137	16.6667	16.6667	16.6667	34.6675	34.6675	50	50	24.0379	24.0379	72.1137	16.6667	16.6667
A595	16.6667	16.6667	16.6667	50	34.6675	34.6675	72.1137	24.0379	24.0379	50	312.007	16.6667	34.6675	24.0379	50	16.6667	24.0375	16.6667	312.007	312.007	34.6675	72.1137	72.1137	16.6667	24.0379	16.6667	16.6667	16.6667	50	50	72.1137	72.1137	50	34.6675	150	24.0379
A596	16.6667	16.6667	16.6667	34.6675	16.6667	50	50	34.6675	50	16.6667	50	16.6667	312.007	72.1137	72.1137	16.6667	24.0375	16.6667	50	50	150	50	24.0379	16.6667	16.6667	16.6667	50	16.6667	16.6667	24.0379	150	104.002	16.6667	104.002	150	312.007
A597	16.6667	150	24.0379	16.6667	216.341	16.6667	34.6675	34.6675	104.002	34.6675	16.6667	34.6675	34.6675	34.6675	24.0379	16.6667	16.6667	16.6667	16.6667	16.6667	72.1137	34.6675	16.6667	34.6675	34.6675	34.6675	34.6675	34.6675	34.6675	50	16.6667	50	24.0379	16.6667	16.6667	16.6667
A598	24.0379	24.0379	104.002	16.6667	34.6675	72.1137	72.1137	150	50	72.1137	24.0379	50	72.1137	24.0379	24.0379	50	16.6667	104.002	24.0379	24.0379	24.0379	72.1137	34.6675	72.1137	50	72.1137	50	72.1137	50	72.1137	50	24.0379	104.002	50	72.1137	50
A599	16.6667	16.6667	34.6675	16.6667	24.0379	16.6667	16.6667	450	16.6667	34.6675	34.6675	50	24.0379	50	16.6667	24.0379	50	16.6667	16.6667	312.007	216.341	16.6667	16.6667	16.6667	50	312.007	50	34.6675	50	34.6675	24.0379	34.6675	16.6667	16.6667	24.0379	34.6675
I600	104.002	34.6675	104.002	50	34.6675	34.6675	24.0379	50	16.6667	24.0379	34.6675	34.6675	72.1137	450	104.002	34.6675	72.1125	34.6675	34.6675	34.6675	34.6675	24.0379	34.6675	34.6675	34.6675	34.6675	16.6667	24.0379	24.0379	104.002	150	16.6667	216.341	16.6667	216.341	150
I601	72.1137	104.002	24.0379	24.0379	72.1137	150	34.6675	24.0379	16.6667	34.6675	104.002	24.0379	16.6667	72.1137	16.6667	16.6667	16.6667	16.6667	104.002	104.002	16.6667	34.6675	24.0379	34.6675	34.6675	24.0379	24.0379	34.6675	34.6675	34.6675	16.6667	50	34.6675	16.6667	24.0379	34.6675
I602	16.6667	24.0379	50	104.002	450	16.6667	50	16.6667	50	16.6667	312.007	24.0379	16.6667	72.1137	24.0379	34.6675	34.6681	16.6667	72.1137	50	312.007	50	50	50	16.6667	24.0379	24.0379	450	16.6667	16.6667	34.6675	16.6667	16.6667	16.6667	34.6675	50
I603	312.007	216.341	72.1137	16.6667	34.6675	50	16.6667	34.6675	150	16.6667	24.0379	50	72.1137	72.1137	34.6675	24.0379	16.6667	34.6675	24.0379	450	24.0379	16.6667	16.6667	34.6675	50	50	24.0379	16.6667	16.6667	16.6667	72.1137	450	24.0379	150	16.6667	16.6667
A604	450	50	72.1137	50	34.6675	34.6675	34.6675	72.1137	16.6667	50	72.1137	450	16.6667	16.6667	34.6675	150	72.1125	24.0379	72.1137	72.1137	72.1137	16.6667	34.6675	50	450	104.002	450	50	16.6667	50	34.6675	24.0379	34.6675	34.6675	16.6667	16.6667
I605	16.6667	24.0379	16.6667	104.002	50	34.6675	150	16.6667	24.0379	16.6667	104.002	16.6667	50	72.1137	50	50	24.0375	16.6667	104.002	104.002	104.002	150	150	150	24.0379	16.6667	16.6667	16.6667	16.6667	16.6667	72.1137	34.6675	50	16.6667	150	24.0379
A606	16.6667	16.6667	50	16.6667	16.6667	16.6667	24.0379	50	16.6667	34.6675	34.6675	50	104.002	16.6667	24.0379	104.002	450	216.341	34.6675	16.6667	34.6675	16.6667	24.0379	24.0379	50	50	16.6667	34.6675	34.6675	34.6675	216.341	24.0379	16.6667	24.0379	72.1137	24.0379
A607	16.6667	16.6667	16.6667	16.6667	24.0379	34.6675	16.6667	216.341	72.1137	104.002	34.6675	312.007	16.6667	50	24.0379	16.6667	150	50	34.6675	34.6675	50	16.6667	16.6667	16.6667	312.007	104.002	312.007	104.002	34.6675	104.002	50	50	24.0379	16.6667	16.6667	16.6667
I608	24.0379	16.6667	34.6675	16.6667	16.6667	450	24.0379	16.6667	24.0379	16.6667	16.6667	16.6667	16.6667	16.6667	24.0379	16.6667	16.6667	16.6667	16.6667	34.6675	16.6667	24.0379	24.0379	24.0379	16.6667	16.6667	16.6667	16.6667	16.6667	16.6667	16.6667	24.0379	16.6667	34.6675	24.0379	34.6675
A609	34.6675	16.6667	72.1137	16.6667	16.6667	24.0379	34.6675	34.6675	16.6667	24.0379	34.6675	16.6667	16.6667	24.0379	50	72.1137	50	104.002	34.6675	34.6675	16.6667	34.6675	34.6675	72.1137	16.6667	16.6667	50	24.0379	24.0379	34.6675	72.1137	24.0379	50	24.0379	16.6667	50
A610	16.6667	24.0379	16.6667	24.0379	16.6667	24.0379	16.6667	150	16.6667	24.0379	24.0379	16.6667	34.6675	72.1137	34.6675	34.6675	50	34.6675	24.0379	24.0379	24.0379	16.6667	16.6667	50	16.6667	34.6675	16.6667	24.0379	50	24.0379	24.0379	16.6667	24.0379	50	16.6667	16.6667
A611	16.6667	216.341	16.6667	16.6667	104.002	16.6667	24.0379	50	150	24.0379	16.6667	16.6667	16.6667	34.6675	24.0379	16.6667	24.0375	72.1137	16.6667	16.6667	16.6667	24.0379	24.0379	24.0379	16.6667	16.6667	16.6667	24.0379	24.0379	72.1137	34.6675	16.6667	16.6667	34.6675	50	24.0379
A612	24.0379	16.6667	16.6667	24.0379	16.6667	104.002	34.6675	450	72.1137	216.341	24.0379	216.341	24.0379	50	24.0379	50	312.013	72.1137	24.0379	24.0379	24.0379	34.6675	34.6675	34.6675	216.341	34.6675	216.341	216.341	150	216.341	72.1137	50	50	24.0379	34.6675	34.6675
A613	72.1137	16.6667	34.6675	72.1137	24.0379	34.6675	216.341	312.007	104.002	24.0379	50	50	104.002	50	50	16.6667	216.337	34.6675	50	50	50	216.341	216.341	216.341	50	34.6675	50	24.0379	150	24.0379	50	34.6675	216.341	312.007	150	312.007
A614	16.6667	16.6667	16.6667	16.6667	16.6667	24.0379	16.6667	216.341	34.6675	34.6675	34.6675	72.1137	50	24.0379	24.0379	34.6675	24.0375	34.6675	34.6675	34.6675	24.0379	16.6667	16.6667	16.6667	72.1137	34.6675	72.1137	34.6675	72.1137	34.6675	24.0379	16.6667	34.6675	50	24.0379	34.6675
I615	50	24.0379	50	16.6667	16.6667	16.6667	24.0379	24.0379	24.0379	16.6667	16.6667	16.6667	16.6667	24.0379	16.6667	50	72.1125	50	16.6667	24.0379	16.6667	24.0379	24.0379	24.0379	16.6667	216.341	16.6667	16.6667	16.6667	16.6667	72.1137	24.0379	24.0379	50	50	16.6667
A616	24.0379	16.6667	24.0379	16.6667	72.1137	16.6667	72.1137	50	150	72.1137	16.6667	16.6667	34.6675	34.6675	16.6667	50	24.0375	50	16.6667	24.0379	16.6667	72.1137	34.6675	34.6675	16.6667	16.6667	24.0379	72.1137	72.1137	34.6675	16.6667	24.0379	72.1137	24.0379	34.6675	34.6675
A617	72.1137	50	150	50	50	24.0379	72.1137	150	150	72.1137	34.6675	72.1137	312.007	104.002	50	104.002	450	216.341	50	16.6667	150	72.1137	72.1137	72.1137	72.1137	150	72.1137	72.1137	16.6667	72.1137	150	150	16.6667	72.1137	150	104.002
A618	16.6667	16.6667	16.6667	24.0379	16.6667	34.6675	34.6675	50	16.6667	24.0379	50	16.6667	150	24.0379	216.341	16.6667	34.6681	16.6667	50	50	16.6667	104.002	34.6675	24.0379	16.6667	16.6667	34.6675	24.0379	24.0379	24.0379	150	72.1137	16.6667	34.6675	150	216.341
A619	50	216.341	312.007	104.002	72.1137	72.1137	150	24.0379	34.6675	34.6675	34.6675	50	72.1137	450	72.1137	34.6675	72.1125	216.341	34.6675	34.6675	24.0379	150	104.002	150	34.6675	50	50	16.6667	34.6675	34.6675	150	450	72.1137	16.6667	216.341	24.0379
A620	50	50	104.002	50	16.6667	34.6675	34.6675	72.1137	16.6667	34.6675	50	16.6667	24.0379	34.6675	150	72.1137	16.6667	24.0379	50	50	50	34.6675	24.0379	34.6675	16.6667	16.6667	16.6667	34.6675	34.6675	16.6667	50	34.6675	150	34.6675	34.6675	72.1137
A621	450	50	104.002	34.6675	34.6675	50	24.0379	50	450	16.6667	24.0379	50	104.002	104.002	24.0379	16.6667	50	34.6675	24.0379	16.6667	72.1137	24.0379	24.0379	24.0379	50	50	16.6667	16.6667	16.6667	16.6667	104.002	312.007	150	216.341	72.1137	150
I622	16.6667	312.007	34.6675	16.6667	16.6667	216.341	24.0379	16.6667	24.0379	16.6667	16.6667	16.6667	24.0379	16.6667	16.6667	34.6675	16.6667	24.0379	24.0379	24.0379	16.6667	24.0379	72.1137	50	16.6667	16.6667	24.0379	16.6667	16.6667	50	34.6675	24.0379	24.0379	34.6675	34.6675	16.6667
A623	72.1137	50	16.6667	16.6667	24.0379	24.0379	16.6667	104.002	16.6667	34.6675	24.0379	72.1137	150	104.002	72.1137	216.341	72.1125	24.0379	24.0379	72.1137	24.0379	16.6667	104.002	16.6667	72.1137	50	72.1137	34.6675	312.007	34.6675	312.007	450	24.0379	72.1137	72.1137	216.341
A624	16.6667	16.6667	16.6667	34.6675	16.6667	34.6675	24.0379	34.6675	312.007	24.0379	34.6675	16.6667	72.1137	34.6675	34.6675	34.6675	34.6681	16.6667	34.6675	34.6675	34.6675	24.0379	150	24.0379	16.6667	16.6667	34.6675	24.0379	24.0379	16.6667	72.1137	312.007	34.6675	150	150	16.6667
A625	72.1137	50	34.6675	50	24.0379	72.1137	72.1137	104.002	72.1137	72.1137	34.6675	72.1137	216.341	50	16.6667	216.341	104.004	104.002	34.6675	34.6675	34.6675	72.1137	72.1137	72.1137	72.1137	150	72.1137	72.1137	104.002	72.1137	104.002	16.6667	104.002	312.007	216.341	216.341
A626	104.002	312.007	34.6675	24.0379	104.002	24.0379	16.6667	50	24.0379	34.6675	104.002	34.6675	16.6667	16.6667	24.0379	16.6667	16.6667	16.6667	104.002	16.6667	16.6667	16.6667	16.6667	16.6667	34.6675	450	34.6675	34.6675	312.007	34.6675	24.0379	50	16.6667	16.6667	16.6667	16.6667
I627	50	16.6667	72.1137	16.6667	16.6667	16.6667	24.0379	34.6675	16.6667	16.6667	34.6675	24.0379	72.1137	34.6675	50	72.1137	72.1125	216.341	34.6675	34.6675	16.6667	24.0379	24.0379	24.0379	24.0379	24.0379	24.0379	16.6667	16.6667	24.0379	150	16.6667	34.6675	24.0379	34.6675	16.6667
A628	104.002	34.6675	24.0379	24.0379	150	24.0379	16.6667	34.6675	24.0379	34.6675	150	34.6675	24.0379	34.6675	16.6667	16.6667	34.6681	16.6667	50	50	312.007	16.6667	16.6667	16.6667	150	34.6675	34.6675	24.0379	34.6675	34.6675	50	16.6667	24.0379	50	24.0379	72.1137
A629	16.6667	16.6667	16.6667	72.1137	34.6675	24.0379	216.341	16.6667	24.0379	16.6667	312.007	16.6667	24.0379	24.0379	50	34.6675	50	16.6667	312.007	312.007	312.007	216.341	216.341	34.6675	50	16.6667	16.6667	16.6667	16.6667	16.6667	16.6667	50	24.0379	34.6675	24.0379	50
A630	50	24.0379	216.341	50	50	72.1137	72.1137	216.341	104.002	72.1137	34.6675	104.002	216.341	104.002	50	72.1137	216.337	150	34.6675	34.6675	16.6667	72.1137	72.1137	50	104.002	50	104.002	72.1137	16.6667	72.1137	150	72.1137	50	104.002	104.002	216.341
A631	16.6667	16.6667	16.6667	16.6667	16.6667	16.6667	16.6667	16.6667	16.6667	16.6667	16.6667	16.6667	16.6667	16.6667	16.6667	16.6667	16.6667	16.6667	16.6667	16.6667	16.6667	16.6667	16.6667	16.6667	16.6667	16.6667	16.6667	16.6667	16.6667	16.6667	16.6667	16.6667	16.6667	16.6667	16.6667	16.6667
A632	34.6675	24.0379	24.0379	24.0379	16.6667	34.6675	50	72.1137	50	34.6675	16.6667	16.6667	16.6667	312.007	312.007	104.002	50	34.6675	16.6667	50	150	50	24.0379	16.6667	16.6667	16.6667	16.6667	34.6675	34.6675	16.6667	72.1137	450	150	150	50	150
A633	24.0379	16.6667	34.6675	150	50	16.6667	50	16.6667	24.0379	16.6667	216.341	16.6667	16.6667	16.6667	24.0379	16.6667	24.0375	16.6667	216.341	150	16.6667	50	50	312.007	50	16.6667	16.6667	34.6675	16.6667	16.6667	24.0379	16.6667	34.6675	24.0379	72.1137	50
A634	104.002	50	104.002	34.6675	34.6675	72.1137	104.002	312.007	24.0379	16.6667	34.6675	72.1137	312.007	72.1137	216.341	34.6675	72.1125	34.6675	34.6675	34.6675	216.341	104.002	104.002	104.002	72.1137	104.002	72.1137	16.6667	34.6675	16.6667	24.0379	150	104.002	72.1137	16.6667	104.002
A635	50	34.6675	16.6667	72.1137	72.1137	50	24.0379	24.0379	34.6675	312.007	24.0379	50	24.0379	312.007	450	16.6667	50	104.002	24.0379	24.0379	24.0379	24.0379	24.0379	24.0379	24.0379	50	50	216.341	312.007	312.007	104.002	150	150	216.341	104.002	16.6667
A636	16.6667	16.6667	16.6667	16.6667	16.6667	16.6667	16.6667	16.6667	16.6667	16.6667	16.6667	16.6667	16.6667	16.6667	16.6667	16.6667	16.6667	16.6667	16.6667	16.6667	16.6667	16.6667	16.6667	16.6667	16.6667	16.6667	16.6667	16.6667	16.6667	16.6667	16.6667	16.6667	16.6667	16.6667	16.6667	16.6667
A637	72.1137	150	150	34.6675	34.6675	34.6675	24.0379	72.1137	16.6667	16.6667	34.6675	24.0379	24.0379	312.007	150	72.1137	150	72.1137	34.6675	72.1137	216.341	24.0379	24.0379	24.0379	24.0379	24.0379	16.6667	16.6667	16.6667	34.6675	50	16.6667	72.1137	72.1137	216.341	72.1137
A638	72.1137	34.6675	34.6675	24.0379	104.002	24.0379	16.6667	50	24.0379	24.0379	104.002	24.0379	24.0379	34.6675	24.0379	16.6667	34.6681	16.6667	104.002	104.002	24.0379	16.6667	16.6667	50	24.0379	34.6675	24.0379	24.0379	16.6667	24.0379	50	24.0379	50	50	34.6675	16.6667
A639	16.6667	16.6667	24.0379	24.0379	24.0379	16.6667	16.6667	104.002	16.6667	34.6675	34.6675	216.341	16.6667	50	24.0379	24.0379	50	16.6667	34.6675	24.0379	34.6675	16.6667	16.6667	72.1137	216.341	34.6675	216.341	34.6675	72.1137	34.6675	16.6667	24.0379	24.0379	16.6667	50	34.6675
A640	24.0379	216.341	24.0379	16.6667	34.6675	24.0379	16.6667	72.1137	24.0379	16.6667	24.0379	50	104.002	150	150	312.007	50	24.0379	50	50	34.6675	16.6667	16.6667	16.6667	50	50	24.0379	16.6667	16.6667	104.002	150	216.341	50	104.002	72.1137	150
A641	72.1137	16.6667	24.0379	16.6667	24.0379	50	24.0379	72.1137	16.6667	24.0379	50	16.6667	150	16.6667	104.002	34.6675	16.6667	24.0379	50	50	24.0379	24.0379	24.0379	24.0379	16.6667	16.6667	16.6667	24.0379	24.0379	24.0379	150	104.002	72.1137	16.6667	216.341	216.341
A642	24.0379	24.0379	16.6667	16.6667	16.6667	24.0379	72.1137	50	16.6667	50	72.1137	16.6667	50	16.6667	72.1137	150	50	34.6675	72.1137	72.1137	34.6675	72.1137	104.002	24.0379	16.6667	216.341	16.6667	50	16.6667	50	16.6667	34.6675	34.6675	16.6667	216.341	72.1137
A643	16.6667	16.6667	16.6667	16.6667	16.6667	16.6667	16.6667	16.6667	16.6667	16.6667	16.6667	16.6667	16.6667	16.6667	16.6667	16.6667	16.6667	16.6667	16.6667	16.6667	16.6667	16.6667	16.6667	16.6667	16.6667	16.6667	16.6667	16.6667	16.6667	16.6667	16.6667	16.6667	16.6667	16.6667	16.6667	16.6667
A644	16.6667	24.0379	16.6667	16.6667	24.0379	34.6675	16.6667	216.341	34.6675	34.6675	24.0379	34.6675	24.0379	16.6667	24.0379	16.6667	24.0375	50	24.0379	24.0379	24.0379	16.6667	16.6667	16.6667	34.6675	50	34.6675	34.6675	24.0379	34.6675	16.6667	34.6675	72.1137	34.6675	24.0379	34.6675
I645	50	16.6667	16.6667	16.6667	16.6667	16.6667	34.6675	50	34.6675	16.6667	16.6667	216.341	24.0379	16.6667	16.6667	50	50	312.007	16.6667	16.6667	24.0379	34.6675	34.6675	50	216.341	104.002	216.341	16.6667	16.6667	16.6667	24.0379	50	24.0379	24.0379	16.6667	50
A646	150	50	150	34.6675	34.6675	104.002	16.6667	34.6675	50	50	24.0379	72.1137	312.007	450	50	16.6667	72.1125	312.007	24.0379	24.0379	24.0379	16.6667	16.6667	16.6667	16.6667	72.1137	72.1137	50	50	50	72.1137	104.002	50	24.0379	104.002	24.0379
A647	16.6667	34.6675	16.6667	16.6667	16.6667	16.6667	16.6667	24.0379	72.1137	16.6667	16.6667	16.6667	24.0379	16.6667	16.6667	24.0379	16.6667	24.0379	16.6667	16.6667	16.6667	16.6667	16.6667	16.6667	16.6667	16.6667	16.6667	16.6667	16.6667	150	24.0379	24.0379	16.6667	50	34.6675	16.6667
I648	34.6675	16.6667	34.6675	24.0379	312.007	16.6667	16.6667	34.6675	50	34.6675	104.002	50	34.6675	24.0379	24.0379	24.0379	34.6681	16.6667	104.002	16.6667	16.6667	16.6667	16.6667	34.6675	50	150	50	34.6675	72.1137	34.6675	50	24.0379	16.6667	24.0379	34.6675	16.6667
A649	150	216.341	34.6675	24.0379	72.1137	150	16.6667	50	24.0379	34.6675	104.002	50	16.6667	50	24.0379	16.6667	34.6681	16.6667	104.002	216.341	104.002	16.6667	16.6667	16.6667	72.1137	50	50	150	34.6675	34.6675	24.0379	50	24.0379	16.6667	24.0379	50
A650	16.6667	72.1137	24.0379	16.6667	150	16.6667	24.0379	50	150	34.6675	16.6667	24.0379	16.6667	34.6675	34.6675	16.6667	24.0375	50	16.6667	34.6675	16.6667	50	24.0379	24.0379	24.0379	24.0379	16.6667	34.6675	34.6675	24.0379	34.6675	16.6667	16.6667	16.6667	34.6675	50
A651	16.6667	24.0379	50	24.0379	34.6675	16.6667	16.6667	150	16.6667	24.0379	34.6675	24.0379	34.6675	34.6675	16.6667	24.0379	16.6667	16.6667	34.6675	34.6675	34.6675	16.6667	50	16.6667	24.0379	50	24.0379	24.0379	24.0379	24.0379	24.0379	34.6675	34.6675	16.6667	50	16.6667
A652	16.6667	72.1137	24.0379	24.0379	104.002	16.6667	24.0379	50	216.341	34.6675	16.6667	24.0379	34.6675	16.6667	34.6675	16.6667	16.6667	50	16.6667	104.002	16.6667	24.0379	24.0379	34.6675	24.0379	24.0379	50	34.6675	34.6675	34.6675	24.0379	34.6675	50	16.6667	24.0379	24.0379
A653	16.6667	34.6675	34.6675	34.6675	24.0379	34.6675	50	72.1137	50	16.6667	24.0379	24.0379	72.1137	312.007	450	312.007	50	50	24.0379	24.0379	24.0379	50	150	104.002	24.0379	24.0379	16.6667	16.6667	16.6667	16.6667	216.341	216.341	72.1137	312.007	72.1137	216.341
I654	34.6675	16.6667	34.6675	16.6667	16.6667	24.0379	24.0379	34.6675	24.0379	16.6667	16.6667	24.0379	34.6675	24.0379	16.6667	50	104.004	72.1137	16.6667	16.6667	16.6667	24.0379	24.0379	104.002	24.0379	312.007	24.0379	16.6667	216.341	16.6667	72.1137	16.6667	34.6675	34.6675	24.0379	34.6675
A655	72.1137	16.6667	16.6667	312.007	34.6675	16.6667	72.1137	24.0379	24.0379	24.0379	34.6675	24.0379	16.6667	50	34.6675	16.6667	34.6681	312.007	34.6675	34.6675	34.6675	72.1137	72.1137	50	24.0379	72.1137	24.0379	24.0379	34.6675	24.0379	34.6675	34.6675	34.6675	34.6675	16.6667	34.6675
I656	24.0379	50	50	150	72.1137	312.007	16.6667	16.6667	24.0379	104.002	34.6675	34.6675	24.0379	72.1137	24.0379	24.0379	24.0375	34.6675	34.6675	50	34.6675	16.6667	16.6667	16.6667	24.0379	34.6675	34.6675	104.002	104.002	104.002	24.0379	16.6667	50	24.0379	50	24.0379
A657	34.6675	16.6667	16.6667	104.002	50	24.0379	50	16.6667	24.0379	72.1137	16.6667	16.6667	24.0379	150	50	24.0379	34.6681	34.6675	16.6667	16.6667	16.6667	50	72.1137	150	34.6675	16.6667	16.6667	34.6675	72.1137	72.1137	24.0379	50	50	16.6667	24.0379	150
I658	50	16.6667	104.002	24.0379	312.007	16.6667	50	16.6667	50	24.0379	24.0379	34.6675	34.6675	24.0379	16.6667	24.0379	16.6667	16.6667	24.0379	24.0379	34.6675	50	50	50	24.0379	34.6675	34.6675	24.0379	24.0379	24.0379	34.6675	50	34.6675	16.6667	24.0379	24.0379
A659	150	50	16.6667	34.6675	50	50	34.6675	24.0379	50	312.007	50	16.6667	24.0379	104.002	104.002	16.6667	50	72.1137	50	50	24.0379	24.0379	24.0379	34.6675	104.002	16.6667	16.6667	34.6675	312.007	312.007	50	104.002	312.007	104.002	24.0379	104.002
A660	16.6667	34.6675	24.0379	34.6675	16.6667	34.6675	216.341	104.002	312.007	34.6675	24.0379	50	104.002	104.002	72.1137	216.341	150	312.007	24.0379	24.0379	16.6667	216.341	216.341	216.341	50	34.6675	50	34.6675	24.0379	34.6675	72.1137	104.002	34.6675	72.1137	312.007	72.1137
A661	104.002	50	50	50	24.0379	24.0379	24.0379	104.002	16.6667	50	50	24.0379	16.6667	34.6675	150	72.1137	50	24.0379	50	50	50	24.0379	24.0379	16.6667	24.0379	24.0379	50	50	50	24.0379	72.1137	24.0379	216.341	50	104.002	104.002
I662	24.0379	104.002	72.1137	216.341	216.341	16.6667	24.0379	16.6667	34.6675	16.6667	150	24.0379	24.0379	16.6667	24.0379	34.6675	24.0375	34.6675	150	150	150	24.0379	24.0379	24.0379	16.6667	24.0379	24.0379	50	16.6667	16.6667	16.6667	16.6667	34.6675	34.6675	50	16.6667
A663	50	24.0379	16.6667	72.1137	50	16.6667	50	16.6667	50	16.6667	150	16.6667	16.6667	16.6667	50	34.6675	16.6667	16.6667	150	50	16.6667	50	50	16.6667	24.0379	16.6667	16.6667	16.6667	16.6667	16.6667	24.0379	34.6675	24.0379	16.6667	50	16.6667
A664	16.6667	216.341	34.6675	16.6667	104.002	16.6667	24.0379	50	216.341	50	16.6667	16.6667	16.6667	34.6675	34.6675	16.6667	24.0375	50	16.6667	16.6667	16.6667	24.0379	24.0379	24.0379	16.6667	16.6667	16.6667	50	50	24.0379	34.6675	16.6667	50	24.0379	24.0379	24.0379
A665	16.6667	34.6675	16.6667	16.6667	16.6667	24.0379	24.0379	150	16.6667	16.6667	24.0379	312.007	24.0379	24.0379	216.341	16.6667	34.6681	72.1137	50	24.0379	104.002	24.0379	16.6667	24.0379	312.007	50	312.007	16.6667	72.1137	16.6667	50	50	104.002	24.0379	24.0379	16.6667
I666	24.0379	34.6675	34.6675	24.0379	104.002	16.6667	24.0379	34.6675	72.1137	24.0379	150	16.6667	72.1137	16.6667	16.6667	16.6667	34.6681	16.6667	150	16.6667	24.0379	24.0379	16.6667	150	50	16.6667	16.6667	450	24.0379	24.0379	34.6675	16.6667	24.0379	16.6667	16.6667	24.0379
I667	16.6667	24.0379	24.0379	34.6675	24.0379	16.6667	34.6675	72.1137	16.6667	72.1137	16.6667	16.6667	24.0379	50	450	34.6675	24.0375	104.002	16.6667	16.6667	72.1137	34.6675	24.0379	34.6675	16.6667	16.6667	50	72.1137	72.1137	34.6675	16.6667	34.6675	16.6667	34.6675	24.0379	72.1137
A668	104.002	72.1137	34.6675	24.0379	72.1137	104.002	16.6667	34.6675	24.0379	50	150	24.0379	16.6667	50	24.0379	16.6667	16.6667	16.6667	150	150	24.0379	16.6667	16.6667	34.6675	72.1137	24.0379	24.0379	24.0379	50	50	50	24.0379	34.6675	16.6667	24.0379	16.6667
A669	312.007	50	24.0379	24.0379	34.6675	50	24.0379	50	450	16.6667	24.0379	50	150	104.002	24.0379	34.6675	50	34.6675	24.0379	150	50	24.0379	34.6675	24.0379	50	50	16.6667	16.6667	16.6667	50	104.002	150	150	312.007	104.002	150
A670	150	24.0379	34.6675	24.0379	24.0379	34.6675	16.6667	104.002	16.6667	24.0379	50	16.6667	72.1137	72.1137	216.341	16.6667	34.6681	24.0379	50	34.6675	50	16.6667	50	16.6667	16.6667	16.6667	24.0379	24.0379	24.0379	16.6667	104.002	50	104.002	72.1137	216.341	104.002
A671	24.0379	16.6667	24.0379	16.6667	16.6667	24.0379	16.6667	72.1137	24.0379	24.0379	24.0379	104.002	34.6675	16.6667	24.0379	104.002	72.1125	104.002	24.0379	24.0379	24.0379	16.6667	16.6667	150	104.002	34.6675	104.002	24.0379	216.341	24.0379	16.6667	24.0379	16.6667	24.0379	24.0379	24.0379
I672	72.1137	72.1137	24.0379	24.0379	104.002	216.341	50	24.0379	16.6667	16.6667	104.002	34.6675	34.6675	34.6675	16.6667	16.6667	16.6667	16.6667	104.002	104.002	24.0379	150	50	16.6667	50	34.6675	34.6675	104.002	16.6667	16.6667	24.0379	16.6667	24.0379	24.0379	16.6667	24.0379
A673	216.341	34.6675	50	50	24.0379	24.0379	24.0379	104.002	16.6667	24.0379	50	24.0379	16.6667	16.6667	312.007	72.1137	50	24.0379	50	16.6667	16.6667	24.0379	24.0379	24.0379	24.0379	24.0379	50	24.0379	24.0379	72.1137	50	50	104.002	16.6667	216.341	50
A674	34.6675	16.6667	24.0379	24.0379	150	16.6667	50	24.0379	16.6667	72.1137	150	24.0379	24.0379	24.0379	34.6675	24.0379	24.0375	16.6667	150	50	150	50	50	50	150	24.0379	24.0379	72.1137	72.1137	72.1137	16.6667	24.0379	50	24.0379	16.6667	24.0379
A675	50	16.6667	50	16.6667	16.6667	16.6667	24.0379	34.6675	16.6667	24.0379	34.6675	24.0379	72.1137	16.6667	50	72.1137	450	216.341	34.6675	34.6675	34.6675	24.0379	24.0379	24.0379	24.0379	24.0379	16.6667	24.0379	24.0379	34.6675	312.007	34.6675	24.0379	24.0379	16.6667	24.0379
I676	16.6667	24.0379	72.1137	150	312.007	16.6667	34.6675	16.6667	16.6667	16.6667	312.007	24.0379	24.0379	50	34.6675	50	16.6667	24.0379	24.0379	312.007	312.007	34.6675	34.6675	24.0379	72.1137	24.0379	24.0379	34.6675	16.6667	16.6667	16.6667	34.6675	50	16.6667	16.6667	24.0379
A677	150	34.6675	16.6667	34.6675	16.6667	34.6675	150	216.341	50	216.341	72.1137	50	450	216.341	216.341	24.0379	150	104.002	72.1137	72.1137	72.1137	150	34.6675	16.6667	50	34.6675	50	216.341	16.6667	216.341	50	16.6667	312.007	150	312.007	216.341
A678	150	34.6675	24.0379	24.0379	34.6675	50	24.0379	50	72.1137	24.0379	34.6675	50	312.007	216.341	72.1137	16.6667	16.6667	16.6667	34.6675	34.6675	34.6675	24.0379	24.0379	216.341	50	50	24.0379	24.0379	24.0379	72.1137	216.341	72.1137	150	104.002	312.007	450
A679	50	50	150	34.6675	50	50	104.002	312.007	34.6675	24.0379	50	150	150	34.6675	104.002	50	72.1125	24.0379	50	50	104.002	104.002	104.002	50	150	216.341	150	24.0379	312.007	24.0379	16.6667	104.002	104.002	72.1137	16.6667	104.002
I680	50	34.6675	34.6675	34.6675	34.6675	24.0379	34.6675	104.002	16.6667	50	50	24.0379	72.1137	104.002	450	16.6667	50	24.0379	50	50	24.0379	34.6675	34.6675	34.6675	24.0379	24.0379	16.6667	50	50	104.002	104.002	72.1137	312.007	72.1137	150	50
A681	16.6667	72.1137	34.6675	34.6675	50	16.6667	16.6667	72.1137	450	34.6675	16.6667	16.6667	24.0379	50	50	16.6667	16.6667	50	16.6667	16.6667	16.6667	16.6667	16.6667	16.6667	16.6667	16.6667	16.6667	34.6675	34.6675	72.1137	24.0379	24.0379	34.6675	34.6675	16.6667	34.6675
I682	450	34.6675	72.1137	50	24.0379	34.6675	16.6667	104.002	16.6667	72.1137	72.1137	450	16.6667	34.6675	72.1137	150	72.1125	24.0379	72.1137	72.1137	72.1137	34.6675	50	24.0379	450	16.6667	450	72.1137	16.6667	72.1137	24.0379	34.6675	16.6667	16.6667	104.002	24.0379
I683	24.0379	312.007	24.0379	24.0379	104.002	16.6667	50	16.6667	16.6667	50	150	24.0379	34.6675	24.0379	24.0379	24.0379	24.0375	16.6667	150	150	50	50	72.1137	50	16.6667	24.0379	24.0379	50	50	50	34.6675	16.6667	16.6667	34.6675	24.0379	34.6675
A684	50	24.0379	16.6667	72.1137	72.1137	50	24.0379	16.6667	24.0379	24.0379	16.6667	16.6667	16.6667	450	104.002	24.0379	16.6667	50	16.6667	16.6667	16.6667	24.0379	24.0379	24.0379	16.6667	16.6667	16.6667	312.007	24.0379	24.0379	16.6667	16.6667	104.002	104.002	72.1137	450
I685	24.0379	24.0379	24.0379	24.0379	34.6675	50	150	312.007	50	104.002	72.1137	216.341	50	34.6675	16.6667	72.1137	104.004	104.002	72.1137	72.1137	72.1137	150	16.6667	150	216.341	216.341	216.341	104.002	24.0379	104.002	72.1137	24.0379	72.1137	50	16.6667	50
A686	450	216.341	150	34.6675	34.6675	34.6675	16.6667	104.002	24.0379	16.6667	34.6675	34.6675	50	150	216.341	450	104.004	450	34.6675	16.6667	104.002	16.6667	16.6667	16.6667	34.6675	16.6667	34.6675	16.6667	24.0379	16.6667	34.6675	72.1137	50	24.0379	16.6667	50
A687	16.6667	450	104.002	34.6675	24.0379	34.6675	104.002	312.007	24.0379	72.1137	72.1137	72.1137	72.1137	34.6675	16.6667	216.341	216.337	150	72.1137	72.1137	72.1137	24.0379	34.6675	104.002	72.1137	150	72.1137	72.1137	34.6675	72.1137	450	72.1137	450	72.1137	150	24.0379
A688	50	216.341	24.0379	72.1137	312.007	16.6667	50	16.6667	16.6667	16.6667	150	50	24.0379	34.6675	34.6675	16.6667	16.6667	16.6667	150	150	150	50	50	72.1137	16.6667	50	50	50	16.6667	16.6667	34.6675	50	16.6667	16.6667	16.6667	16.6667
A689	34.6675	312.007	34.6675	72.1137	450	16.6667	72.1137	16.6667	16.6667	34.6675	216.341	34.6675	16.6667	24.0379	16.6667	24.0379	16.6667	16.6667	216.341	216.341	150	72.1137	72.1137	72.1137	16.6667	34.6675	34.6675	34.6675	34.6675	34.6675	16.6667	24.0379	34.6675	50	16.6667	16.6667
A690	72.1137	34.6675	104.002	34.6675	34.6675	34.6675	24.0379	50	16.6667	16.6667	24.0379	24.0379	150	216.341	104.002	50	150	72.1137	24.0379	24.0379	24.0379	24.0379	24.0379	24.0379	24.0379	24.0379	24.0379	16.6667	16.6667	34.6675	312.007	72.1137	104.002	104.002	104.002	104.002
A691	34.6675	24.0379	34.6675	72.1137	216.341	16.6667	72.1137	16.6667	16.6667	24.0379	216.341	16.6667	16.6667	34.6675	24.0379	24.0379	16.6667	16.6667	216.341	216.341	216.341	72.1137	72.1137	72.1137	16.6667	16.6667	16.6667	72.1137	24.0379	24.0379	24.0379	16.6667	24.0379	34.6675	24.0379	34.6675
A692	150	34.6675	16.6667	34.6675	34.6675	104.002	16.6667	24.0379	24.0379	50	24.0379	72.1137	216.341	150	16.6667	34.6675	24.0375	104.002	16.6667	24.0379	24.0379	16.6667	16.6667	312.007	16.6667	72.1137	72.1137	72.1137	50	50	50	312.007	104.002	16.6667	16.6667	24.0379
I693	34.6675	16.6667	34.6675	150	104.002	34.6675	16.6667	16.6667	24.0379	24.0379	24.0379	24.0379	16.6667	34.6675	16.6667	34.6675	16.6667	50	24.0379	34.6675	104.002	16.6667	16.6667	16.6667	34.6675	24.0379	24.0379	24.0379	24.0379	24.0379	16.6667	16.6667	16.6667	16.6667	24.0379	16.6667
A694	50	450	24.0379	24.0379	24.0379	16.6667	16.6667	72.1137	24.0379	216.341	34.6675	34.6675	24.0379	16.6667	34.6675	16.6667	50	16.6667	34.6675	34.6675	72.1137	16.6667	16.6667	24.0379	34.6675	150	34.6675	216.341	16.6667	216.341	16.6667	50	16.6667	16.6667	16.6667	16.6667
A695	50	216.341	24.0379	50	216.341	16.6667	150	16.6667	16.6667	24.0379	150	34.6675	24.0379	24.0379	34.6675	24.0379	34.6681	16.6667	150	150	150	150	150	150	50	34.6675	34.6675	34.6675	24.0379	24.0379	24.0379	16.6667	16.6667	24.0379	24.0379	24.0379
I696	16.6667	312.007	34.6675	104.002	312.007	312.007	16.6667	16.6667	34.6675	104.002	24.0379	34.6675	24.0379	50	24.0379	16.6667	16.6667	16.6667	24.0379	72.1137	24.0379	16.6667	72.1137	16.6667	16.6667	34.6675	34.6675	72.1137	104.002	104.002	16.6667	16.6667	34.6675	16.6667	34.6675	50
A697	24.0379	24.0379	150	24.0379	24.0379	24.0379	72.1137	150	72.1137	16.6667	24.0379	16.6667	150	150	150	150	150	312.007	24.0379	216.341	16.6667	16.6667	72.1137	72.1137	16.6667	16.6667	50	16.6667	16.6667	16.6667	104.002	24.0379	72.1137	50	150	104.002
A698	16.6667	16.6667	16.6667	24.0379	24.0379	16.6667	24.0379	216.341	16.6667	16.6667	24.0379	50	50	24.0379	72.1137	34.6675	16.6667	34.6675	24.0379	24.0379	72.1137	24.0379	24.0379	50	50	72.1137	50	16.6667	16.6667	16.6667	24.0379	34.6675	16.6667	72.1137	16.6667	24.0379
I699	104.002	34.6675	104.002	16.6667	34.6675	24.0379	16.6667	50	150	16.6667	16.6667	24.0379	24.0379	72.1137	24.0379	16.6667	50	16.6667	16.6667	16.6667	312.007	16.6667	150	16.6667	24.0379	24.0379	16.6667	16.6667	16.6667	50	50	24.0379	24.0379	50	24.0379	72.1137
A700	72.1137	34.6675	34.6675	34.6675	34.6675	34.6675	24.0379	72.1137	16.6667	34.6675	50	34.6675	104.002	104.002	104.002	34.6675	50	24.0379	50	16.6667	50	24.0379	24.0379	72.1137	34.6675	34.6675	24.0379	34.6675	34.6675	24.0379	312.007	104.002	150	24.0379	312.007	150
A701	16.6667	312.007	72.1137	104.002	450	16.6667	34.6675	16.6667	16.6667	24.0379	312.007	24.0379	16.6667	16.6667	24.0379	50	24.0375	16.6667	312.007	312.007	16.6667	34.6675	72.1137	16.6667	34.6675	24.0379	24.0379	16.6667	24.0379	24.0379	16.6667	16.6667	16.6667	16.6667	16.6667	24.0379
A702	16.6667	450	16.6667	16.6667	450	16.6667	34.6675	50	104.002	24.0379	16.6667	16.6667	24.0379	34.6675	16.6667	24.0379	24.0375	34.6675	16.6667	16.6667	24.0379	34.6675	34.6675	34.6675	16.6667	16.6667	16.6667	24.0379	24.0379	16.6667	34.6675	24.0379	24.0379	50	50	24.0379
I703	34.6675	16.6667	50	216.341	104.002	104.002	16.6667	16.6667	34.6675	16.6667	50	16.6667	34.6675	72.1137	50	34.6675	16.6667	50	50	50	50	16.6667	16.6667	16.6667	72.1137	16.6667	16.6667	34.6675	16.6667	16.6667	34.6675	24.0379	24.0379	16.6667	34.6675	16.6667
I704	24.0379	16.6667	72.1137	16.6667	16.6667	24.0379	16.6667	24.0379	24.0379	16.6667	16.6667	16.6667	16.6667	16.6667	16.6667	16.6667	72.1125	50	16.6667	24.0379	16.6667	16.6667	16.6667	16.6667	16.6667	150	16.6667	16.6667	104.002	16.6667	24.0379	24.0379	34.6675	34.6675	34.6675	16.6667
A705	24.0379	16.6667	34.6675	72.1137	312.007	16.6667	34.6675	16.6667	50	16.6667	450	34.6675	24.0379	16.6667	34.6675	16.6667	16.6667	24.0379	50	450	72.1137	34.6675	34.6675	16.6667	16.6667	34.6675	34.6675	34.6675	16.6667	16.6667	16.6667	16.6667	24.0379	24.0379	50	34.6675
A706	150	72.1137	216.341	24.0379	34.6675	34.6675	50	150	104.002	104.002	34.6675	72.1137	216.341	72.1137	50	216.341	450	72.1137	34.6675	104.002	16.6667	50	50	50	72.1137	24.0379	72.1137	104.002	24.0379	104.002	216.341	104.002	34.6675	104.002	216.341	216.341
A707	312.007	450	16.6667	34.6675	50	50	24.0379	16.6667	34.6675	450	50	34.6675	16.6667	72.1137	104.002	50	34.6681	50	50	50	150	24.0379	24.0379	24.0379	16.6667	34.6675	34.6675	16.6667	450	450	24.0379	104.002	216.341	24.0379	72.1137	150
A708	150	312.007	24.0379	16.6667	216.341	50	16.6667	50	24.0379	16.6667	150	34.6675	24.0379	34.6675	16.6667	16.6667	24.0375	16.6667	150	150	216.341	16.6667	16.6667	16.6667	34.6675	72.1137	34.6675	16.6667	104.002	16.6667	16.6667	34.6675	16.6667	16.6667	24.0379	24.0379
A709	104.002	104.002	216.341	50	50	24.0379	450	34.6675	24.0379	34.6675	104.002	104.002	104.002	150	34.6675	16.6667	104.004	50	104.002	104.002	16.6667	450	450	50	104.002	150	104.002	34.6675	24.0379	34.6675	50	72.1137	50	16.6667	72.1137	24.0379
A710	150	72.1137	24.0379	34.6675	34.6675	72.1137	24.0379	24.0379	34.6675	50	24.0379	72.1137	104.002	104.002	16.6667	50	50	104.002	24.0379	24.0379	16.6667	24.0379	24.0379	24.0379	16.6667	72.1137	72.1137	150	50	50	34.6675	216.341	104.002	16.6667	72.1137	50
A711	16.6667	24.0379	16.6667	16.6667	24.0379	104.002	104.002	312.007	16.6667	104.002	72.1137	450	24.0379	16.6667	34.6675	312.007	312.013	72.1137	72.1137	72.1137	50	104.002	104.002	104.002	450	216.341	450	104.002	50	104.002	16.6667	16.6667	16.6667	16.6667	24.0379	24.0379
I712	50	24.0379	104.002	24.0379	34.6675	24.0379	24.0379	50	150	16.6667	16.6667	16.6667	24.0379	72.1137	50	16.6667	34.6681	16.6667	16.6667	16.6667	16.6667	24.0379	24.0379	24.0379	16.6667	16.6667	24.0379	16.6667	16.6667	16.6667	24.0379	34.6675	24.0379	72.1137	16.6667	50
A713	34.6675	50	72.1137	50	16.6667	34.6675	16.6667	104.002	24.0379	34.6675	50	24.0379	72.1137	150	216.341	34.6675	16.6667	24.0379	50	34.6675	16.6667	16.6667	16.6667	16.6667	24.0379	24.0379	16.6667	34.6675	34.6675	16.6667	104.002	72.1137	312.007	72.1137	104.002	50
A714	16.6667	16.6667	16.6667	16.6667	16.6667	34.6675	34.6675	50	16.6667	50	72.1137	16.6667	104.002	50	150	72.1137	50	34.6675	72.1137	24.0379	150	34.6675	34.6675	34.6675	16.6667	16.6667	16.6667	50	50	16.6667	104.002	50	16.6667	50	216.341	104.002
A715	24.0379	104.002	50	150	150	216.341	16.6667	16.6667	34.6675	34.6675	34.6675	24.0379	16.6667	16.6667	16.6667	16.6667	24.0375	16.6667	34.6675	34.6675	34.6675	16.6667	16.6667	24.0379	34.6675	24.0379	24.0379	104.002	34.6675	34.6675	16.6667	16.6667	16.6667	50	24.0379	16.6667
A716	24.0379	16.6667	16.6667	16.6667	24.0379	50	34.6675	150	16.6667	104.002	72.1137	72.1137	24.0379	16.6667	34.6675	450	312.013	72.1137	72.1137	72.1137	72.1137	34.6675	16.6667	24.0379	72.1137	50	72.1137	104.002	50	104.002	24.0379	72.1137	16.6667	24.0379	34.6675	16.6667
A717	16.6667	24.0379	16.6667	16.6667	24.0379	34.6675	16.6667	450	72.1137	72.1137	50	312.007	16.6667	24.0379	16.6667	16.6667	72.1125	50	50	50	24.0379	16.6667	16.6667	34.6675	312.007	104.002	312.007	72.1137	16.6667	72.1137	24.0379	16.6667	50	16.6667	16.6667	16.6667
A718	216.341	50	150	24.0379	34.6675	24.0379	34.6675	50	24.0379	16.6667	34.6675	24.0379	16.6667	216.341	150	72.1137	150	450	34.6675	34.6675	34.6675	34.6675	34.6675	34.6675	24.0379	24.0379	34.6675	16.6667	16.6667	16.6667	50	34.6675	50	72.1137	104.002	72.1137
I719	16.6667	24.0379	16.6667	16.6667	24.0379	72.1137	72.1137	24.0379	24.0379	16.6667	24.0379	50	16.6667	50	16.6667	312.007	50	104.002	34.6675	24.0379	450	72.1137	72.1137	72.1137	50	216.341	50	16.6667	16.6667	16.6667	16.6667	24.0379	24.0379	34.6675	16.6667	72.1137
A720	16.6667	50	16.6667	50	24.0379	34.6675	50	34.6675	24.0379	34.6675	104.002	16.6667	150	24.0379	50	50	50	24.0379	50	104.002	104.002	50	34.6675	24.0379	16.6667	16.6667	16.6667	50	34.6675	34.6675	104.002	72.1137	24.0379	16.6667	72.1137	72.1137
A721	72.1137	24.0379	104.002	50	34.6675	104.002	104.002	216.341	50	72.1137	34.6675	104.002	216.341	216.341	450	34.6675	72.1125	104.002	34.6675	34.6675	34.6675	104.002	104.002	16.6667	104.002	72.1137	104.002	72.1137	104.002	72.1137	450	450	24.0379	72.1137	24.0379	104.002
A722	24.0379	24.0379	24.0379	24.0379	34.6675	50	72.1137	216.341	50	72.1137	34.6675	104.002	50	16.6667	16.6667	50	72.1125	72.1137	34.6675	34.6675	34.6675	72.1137	16.6667	72.1137	104.002	104.002	104.002	72.1137	34.6675	72.1137	50	16.6667	72.1137	34.6675	16.6667	50
A723	16.6667	34.6675	24.0379	72.1137	34.6675	72.1137	50	24.0379	24.0379	24.0379	34.6675	50	150	50	50	72.1137	72.1125	34.6675	34.6675	34.6675	34.6675	50	216.341	50	16.6667	50	50	72.1137	24.0379	24.0379	104.002	150	72.1137	72.1137	150	24.0379
A724	24.0379	34.6675	104.002	16.6667	16.6667	24.0379	34.6675	216.341	50	16.6667	24.0379	16.6667	450	312.007	312.007	104.002	150	450	24.0379	34.6675	24.0379	34.6675	16.6667	34.6675	16.6667	16.6667	24.0379	16.6667	16.6667	16.6667	216.341	72.1137	24.0379	104.002	104.002	16.6667
A725	24.0379	150	34.6675	104.002	104.002	312.007	16.6667	16.6667	50	34.6675	34.6675	24.0379	16.6667	16.6667	34.6675	16.6667	16.6667	16.6667	34.6675	34.6675	34.6675	150	16.6667	150	16.6667	24.0379	24.0379	312.007	34.6675	34.6675	16.6667	24.0379	24.0379	16.6667	24.0379	34.6675
A726	450	34.6675	104.002	24.0379	24.0379	72.1137	72.1137	312.007	24.0379	50	34.6675	104.002	150	150	450	34.6675	50	450	34.6675	34.6675	24.0379	16.6667	50	16.6667	104.002	34.6675	104.002	50	50	50	72.1137	216.341	72.1137	72.1137	24.0379	104.002
M727	50	34.6675	150	16.6667	50	72.1137	24.0379	50	312.007	16.6667	16.6667	34.6675	50	24.0379	50	72.1137	16.6667	24.0379	16.6667	16.6667	150	24.0379	24.0379	24.0379	34.6675	34.6675	50	16.6667	16.6667	16.6667	24.0379	72.1137	150	34.6675	34.6675	34.6675
M728	50	50	312.007	150	50	72.1137	104.002	24.0379	16.6667	16.6667	24.0379	72.1137	312.007	104.002	150	104.002	312.013	50	24.0379	24.0379	72.1137	104.002	24.0379	104.002	16.6667	72.1137	72.1137	16.6667	16.6667	16.6667	72.1137	104.002	312.007	34.6675	24.0379	312.007
M729	34.6675	34.6675	150	104.002	34.6675	24.0379	72.1137	24.0379	16.6667	24.0379	34.6675	104.002	312.007	72.1137	72.1137	216.341	216.337	50	34.6675	34.6675	34.6675	72.1137	34.6675	312.007	104.002	50	104.002	24.0379	34.6675	24.0379	16.6667	150	72.1137	450	312.007	72.1137
M730	34.6675	24.0379	150	104.002	50	104.002	72.1137	24.0379	24.0379	16.6667	24.0379	72.1137	104.002	16.6667	104.002	312.007	312.013	24.0379	24.0379	24.0379	16.6667	72.1137	16.6667	72.1137	16.6667	72.1137	72.1137	24.0379	16.6667	16.6667	216.341	150	72.1137	450	150	72.1137
M731	16.6667	72.1137	34.6675	16.6667	16.6667	312.007	24.0379	24.0379	34.6675	104.002	16.6667	16.6667	34.6675	16.6667	34.6675	24.0379	34.6681	24.0379	16.6667	16.6667	16.6667	34.6675	24.0379	24.0379	16.6667	16.6667	16.6667	104.002	104.002	24.0379	50	24.0379	24.0379	50	16.6667	34.6675
M732	50	72.1137	24.0379	24.0379	216.341	150	72.1137	16.6667	16.6667	16.6667	104.002	24.0379	16.6667	24.0379	34.6675	16.6667	16.6667	16.6667	104.002	104.002	104.002	72.1137	72.1137	72.1137	50	24.0379	24.0379	104.002	16.6667	16.6667	16.6667	24.0379	16.6667	24.0379	24.0379	24.0379
M733	50	50	34.6675	34.6675	150	450	72.1137	16.6667	16.6667	150	104.002	50	16.6667	16.6667	34.6675	16.6667	16.6667	16.6667	104.002	104.002	104.002	72.1137	72.1137	24.0379	16.6667	50	50	150	150	150	34.6675	16.6667	50	34.6675	16.6667	24.0379
M734	50	50	312.007	312.007	72.1137	104.002	104.002	34.6675	16.6667	16.6667	24.0379	72.1137	450	312.007	72.1137	16.6667	150	50	24.0379	34.6675	24.0379	104.002	104.002	104.002	24.0379	72.1137	72.1137	34.6675	16.6667	16.6667	104.002	104.002	104.002	72.1137	72.1137	150
M735	450	34.6675	216.341	34.6675	34.6675	104.002	50	72.1137	24.0379	16.6667	50	312.007	72.1137	72.1137	216.341	72.1137	72.1125	34.6675	50	50	50	50	50	150	312.007	150	312.007	16.6667	104.002	16.6667	16.6667	104.002	24.0379	34.6675	24.0379	24.0379
M736	50	24.0379	312.007	104.002	50	104.002	216.341	24.0379	16.6667	16.6667	72.1137	104.002	150	16.6667	450	150	150	34.6675	72.1137	72.1137	24.0379	216.341	216.341	50	104.002	104.002	104.002	24.0379	16.6667	16.6667	50	50	150	104.002	150	150
M737	16.6667	16.6667	16.6667	16.6667	16.6667	34.6675	72.1137	72.1137	16.6667	50	72.1137	34.6675	16.6667	24.0379	16.6667	150	150	50	72.1137	72.1137	16.6667	24.0379	34.6675	72.1137	34.6675	34.6675	34.6675	50	16.6667	50	50	34.6675	16.6667	24.0379	72.1137	72.1137
M738	34.6675	24.0379	312.007	312.007	72.1137	72.1137	72.1137	24.0379	16.6667	16.6667	16.6667	50	50	104.002	150	72.1137	72.1125	34.6675	16.6667	16.6667	24.0379	72.1137	104.002	72.1137	24.0379	50	50	34.6675	16.6667	16.6667	150	450	216.341	150	104.002	216.341
M739	24.0379	72.1137	34.6675	24.0379	150	104.002	50	16.6667	16.6667	72.1137	104.002	16.6667	34.6675	16.6667	16.6667	16.6667	16.6667	16.6667	104.002	104.002	104.002	50	34.6675	50	50	16.6667	16.6667	34.6675	72.1137	72.1137	24.0379	16.6667	34.6675	34.6675	16.6667	24.0379
M740	16.6667	34.6675	50	150	450	16.6667	34.6675	16.6667	34.6675	24.0379	312.007	34.6675	16.6667	34.6675	24.0379	50	24.0375	16.6667	72.1137	312.007	16.6667	16.6667	34.6675	16.6667	16.6667	34.6675	34.6675	16.6667	24.0379	24.0379	34.6675	24.0379	16.6667	34.6675	24.0379	16.6667
M741	24.0379	104.002	72.1137	312.007	312.007	312.007	16.6667	16.6667	34.6675	16.6667	104.002	34.6675	16.6667	50	16.6667	24.0379	16.6667	24.0379	34.6675	104.002	104.002	16.6667	16.6667	72.1137	104.002	34.6675	34.6675	24.0379	16.6667	16.6667	24.0379	16.6667	16.6667	24.0379	16.6667	34.6675
M742	16.6667	34.6675	16.6667	16.6667	24.0379	72.1137	104.002	16.6667	16.6667	50	104.002	104.002	24.0379	16.6667	16.6667	312.007	216.337	72.1137	104.002	104.002	104.002	104.002	16.6667	16.6667	104.002	104.002	104.002	50	34.6675	50	16.6667	24.0379	24.0379	24.0379	24.0379	34.6675
M743	24.0379	16.6667	72.1137	16.6667	16.6667	16.6667	16.6667	34.6675	24.0379	24.0379	24.0379	24.0379	50	16.6667	16.6667	72.1137	312.013	216.341	24.0379	16.6667	312.007	16.6667	16.6667	16.6667	24.0379	312.007	24.0379	24.0379	150	24.0379	104.002	34.6675	34.6675	24.0379	16.6667	34.6675
M744	16.6667	150	50	16.6667	16.6667	216.341	16.6667	24.0379	24.0379	24.0379	16.6667	16.6667	16.6667	50	24.0379	34.6675	34.6681	34.6675	34.6675	16.6667	16.6667	16.6667	16.6667	16.6667	16.6667	16.6667	24.0379	24.0379	24.0379	16.6667	16.6667	50	16.6667	24.0379	16.6667	16.6667
M745	450	24.0379	72.1137	50	34.6675	72.1137	104.002	104.002	50	72.1137	34.6675	72.1137	312.007	104.002	312.007	34.6675	72.1125	450	34.6675	24.0379	50	104.002	104.002	104.002	72.1137	450	72.1137	72.1137	24.0379	72.1137	450	150	104.002	216.341	72.1137	216.341
M746	34.6675	34.6675	50	216.341	104.002	24.0379	24.0379	16.6667	34.6675	24.0379	34.6675	24.0379	16.6667	16.6667	16.6667	16.6667	16.6667	50	34.6675	150	34.6675	24.0379	24.0379	24.0379	72.1137	24.0379	24.0379	34.6675	24.0379	24.0379	16.6667	16.6667	16.6667	50	24.0379	16.6667
M747	72.1137	72.1137	24.0379	24.0379	104.002	150	34.6675	16.6667	16.6667	34.6675	104.002	16.6667	50	16.6667	34.6675	16.6667	24.0375	16.6667	104.002	24.0379	104.002	34.6675	34.6675	450	24.0379	16.6667	16.6667	34.6675	34.6675	34.6675	34.6675	16.6667	34.6675	24.0379	24.0379	24.0379
M748	50	72.1137	16.6667	50	24.0379	72.1137	104.002	24.0379	24.0379	16.6667	16.6667	104.002	16.6667	24.0379	34.6675	450	50	150	16.6667	16.6667	16.6667	16.6667	104.002	104.002	104.002	24.0379	104.002	16.6667	24.0379	16.6667	34.6675	50	24.0379	24.0379	16.6667	16.6667
M749	34.6675	24.0379	16.6667	104.002	50	104.002	72.1137	16.6667	16.6667	24.0379	16.6667	16.6667	50	150	104.002	16.6667	16.6667	24.0379	16.6667	16.6667	16.6667	216.341	72.1137	72.1137	104.002	16.6667	16.6667	104.002	24.0379	24.0379	50	16.6667	104.002	150	104.002	150
M750	24.0379	104.002	50	312.007	150	450	24.0379	16.6667	34.6675	104.002	24.0379	16.6667	16.6667	16.6667	24.0379	16.6667	16.6667	24.0379	216.341	50	24.0379	50	312.007	16.6667	34.6675	16.6667	16.6667	150	104.002	104.002	16.6667	24.0379	24.0379	24.0379	16.6667	16.6667
M751	16.6667	24.0379	16.6667	16.6667	16.6667	104.002	16.6667	16.6667	150	50	24.0379	34.6675	34.6675	16.6667	16.6667	34.6675	16.6667	24.0379	24.0379	24.0379	50	16.6667	16.6667	16.6667	34.6675	34.6675	34.6675	50	50	24.0379	24.0379	16.6667	16.6667	16.6667	50	24.0379
M752	216.341	50	104.002	34.6675	16.6667	50	16.6667	34.6675	24.0379	24.0379	50	24.0379	34.6675	150	312.007	34.6675	72.1125	34.6675	50	16.6667	150	16.6667	34.6675	24.0379	24.0379	24.0379	16.6667	24.0379	24.0379	24.0379	72.1137	72.1137	150	72.1137	150	24.0379
M753	16.6667	216.341	34.6675	24.0379	24.0379	16.6667	24.0379	72.1137	16.6667	72.1137	16.6667	16.6667	34.6675	16.6667	450	16.6667	24.0375	50	16.6667	16.6667	34.6675	24.0379	24.0379	24.0379	16.6667	16.6667	16.6667	72.1137	72.1137	50	16.6667	16.6667	72.1137	16.6667	16.6667	50
M754	24.0379	16.6667	24.0379	16.6667	16.6667	24.0379	24.0379	16.6667	16.6667	34.6675	16.6667	16.6667	16.6667	34.6675	16.6667	34.6675	16.6667	24.0379	16.6667	34.6675	16.6667	24.0379	24.0379	24.0379	16.6667	16.6667	16.6667	34.6675	34.6675	24.0379	16.6667	34.6675	16.6667	16.6667	34.6675	16.6667
M755	34.6675	16.6667	72.1137	24.0379	50	150	16.6667	24.0379	34.6675	72.1137	24.0379	34.6675	24.0379	24.0379	24.0379	16.6667	34.6681	34.6675	24.0379	50	24.0379	16.6667	16.6667	16.6667	34.6675	312.007	34.6675	72.1137	72.1137	72.1137	34.6675	24.0379	24.0379	24.0379	16.6667	34.6675
M756	34.6675	16.6667	50	450	16.6667	72.1137	16.6667	16.6667	312.007	24.0379	34.6675	16.6667	16.6667	34.6675	24.0379	104.002	24.0375	24.0379	24.0379	34.6675	34.6675	16.6667	16.6667	16.6667	16.6667	16.6667	16.6667	24.0379	24.0379	50	24.0379	24.0379	34.6675	72.1137	16.6667	16.6667
M757	34.6675	16.6667	50	16.6667	16.6667	450	24.0379	24.0379	72.1137	24.0379	16.6667	16.6667	34.6675	16.6667	34.6675	72.1137	16.6667	34.6675	16.6667	16.6667	34.6675	24.0379	24.0379	16.6667	16.6667	16.6667	24.0379	24.0379	24.0379	50	24.0379	16.6667	16.6667	24.0379	24.0379	34.6675
M758	24.0379	16.6667	50	16.6667	16.6667	450	24.0379	24.0379	24.0379	24.0379	16.6667	16.6667	24.0379	16.6667	16.6667	50	34.6681	72.1137	16.6667	16.6667	16.6667	24.0379	50	24.0379	16.6667	16.6667	16.6667	24.0379	24.0379	24.0379	24.0379	34.6675	50	34.6675	50	16.6667
M759	16.6667	16.6667	16.6667	16.6667	16.6667	16.6667	16.6667	16.6667	16.6667	16.6667	16.6667	16.6667	16.6667	16.6667	16.6667	16.6667	16.6667	16.6667	16.6667	16.6667	16.6667	16.6667	16.6667	16.6667	16.6667	16.6667	16.6667	16.6667	16.6667	16.6667	16.6667	16.6667	16.6667	16.6667	16.6667	16.6667
M760	104.002	34.6675	16.6667	34.6675	50	104.002	16.6667	16.6667	34.6675	34.6675	50	72.1137	50	16.6667	312.007	312.007	34.6681	104.002	50	24.0379	50	24.0379	16.6667	50	72.1137	72.1137	72.1137	24.0379	34.6675	34.6675	16.6667	72.1137	104.002	24.0379	24.0379	16.6667
M761	16.6667	16.6667	16.6667	16.6667	16.6667	16.6667	16.6667	16.6667	16.6667	16.6667	16.6667	16.6667	16.6667	16.6667	16.6667	16.6667	16.6667	16.6667	16.6667	16.6667	16.6667	16.6667	16.6667	16.6667	16.6667	16.6667	16.6667	16.6667	16.6667	16.6667	16.6667	16.6667	16.6667	16.6667	16.6667	16.6667
M762	16.6667	72.1137	72.1137	16.6667	34.6675	150	16.6667	24.0379	34.6675	34.6675	16.6667	16.6667	16.6667	16.6667	24.0379	24.0379	34.6681	16.6667	16.6667	16.6667	150	16.6667	16.6667	72.1137	16.6667	216.341	16.6667	34.6675	24.0379	34.6675	34.6675	24.0379	50	34.6675	34.6675	34.6675
M763	72.1137	150	104.002	34.6675	24.0379	50	34.6675	50	216.341	16.6667	16.6667	50	72.1137	150	50	104.002	72.1125	50	16.6667	150	16.6667	50	34.6675	16.6667	50	50	16.6667	16.6667	16.6667	16.6667	104.002	312.007	104.002	450	34.6675	312.007
M764	16.6667	72.1137	50	16.6667	16.6667	216.341	24.0379	24.0379	34.6675	150	16.6667	16.6667	16.6667	16.6667	16.6667	24.0379	16.6667	24.0379	16.6667	16.6667	24.0379	24.0379	24.0379	150	16.6667	16.6667	16.6667	150	150	16.6667	16.6667	16.6667	34.6675	34.6675	24.0379	24.0379
M765	150	34.6675	104.002	16.6667	16.6667	72.1137	16.6667	34.6675	450	24.0379	34.6675	34.6675	216.341	104.002	16.6667	24.0379	34.6681	24.0379	34.6675	34.6675	34.6675	50	16.6667	34.6675	34.6675	34.6675	24.0379	24.0379	24.0379	72.1137	104.002	150	16.6667	312.007	312.007	150
M766	50	24.0379	104.002	34.6675	34.6675	50	24.0379	50	450	16.6667	24.0379	34.6675	72.1137	104.002	16.6667	50	50	34.6675	24.0379	24.0379	24.0379	24.0379	24.0379	34.6675	34.6675	34.6675	24.0379	16.6667	16.6667	16.6667	104.002	216.341	450	150	24.0379	216.341
M767	34.6675	16.6667	16.6667	16.6667	16.6667	24.0379	16.6667	16.6667	24.0379	16.6667	16.6667	50	34.6675	24.0379	34.6675	72.1137	50	104.002	16.6667	16.6667	16.6667	50	16.6667	24.0379	50	150	50	16.6667	24.0379	16.6667	34.6675	16.6667	24.0379	24.0379	24.0379	16.6667
M768	216.341	34.6675	72.1137	34.6675	16.6667	72.1137	216.341	16.6667	72.1137	16.6667	72.1137	72.1137	50	104.002	50	34.6675	104.004	450	104.002	72.1137	72.1137	16.6667	216.341	216.341	72.1137	104.002	72.1137	16.6667	24.0379	16.6667	16.6667	24.0379	150	50	312.007	104.002
M769	216.341	16.6667	16.6667	50	24.0379	24.0379	16.6667	16.6667	34.6675	34.6675	34.6675	150	34.6675	16.6667	104.002	104.002	34.6681	150	34.6675	34.6675	34.6675	16.6667	16.6667	16.6667	104.002	150	150	34.6675	34.6675	34.6675	24.0379	50	72.1137	16.6667	34.6675	34.6675
M770	50	104.002	34.6675	24.0379	104.002	312.007	50	16.6667	16.6667	50	104.002	16.6667	16.6667	34.6675	16.6667	16.6667	16.6667	16.6667	104.002	16.6667	104.002	50	50	150	24.0379	16.6667	16.6667	104.002	50	50	24.0379	34.6675	16.6667	50	16.6667	50
M771	24.0379	50	50	16.6667	16.6667	150	24.0379	24.0379	24.0379	24.0379	16.6667	16.6667	24.0379	34.6675	24.0379	16.6667	34.6681	50	16.6667	16.6667	34.6675	24.0379	24.0379	24.0379	16.6667	16.6667	16.6667	24.0379	24.0379	16.6667	16.6667	24.0379	24.0379	16.6667	16.6667	16.6667
M772	16.6667	72.1137	72.1137	16.6667	24.0379	216.341	24.0379	24.0379	34.6675	72.1137	16.6667	16.6667	24.0379	34.6675	34.6675	16.6667	34.6681	24.0379	34.6675	16.6667	16.6667	24.0379	24.0379	34.6675	16.6667	16.6667	34.6675	72.1137	72.1137	16.6667	34.6675	24.0379	34.6675	50	16.6667	16.6667
M773	216.341	50	34.6675	24.0379	24.0379	24.0379	104.002	24.0379	16.6667	16.6667	72.1137	150	50	34.6675	34.6675	16.6667	150	216.341	72.1137	312.007	216.341	104.002	50	104.002	150	34.6675	150	16.6667	34.6675	16.6667	24.0379	50	16.6667	50	16.6667	16.6667
M774	16.6667	24.0379	34.6675	24.0379	16.6667	50	16.6667	34.6675	450	16.6667	34.6675	16.6667	216.341	50	34.6675	34.6675	34.6681	24.0379	34.6675	24.0379	34.6675	16.6667	16.6667	16.6667	16.6667	16.6667	16.6667	16.6667	16.6667	16.6667	104.002	312.007	50	312.007	312.007	104.002
M775	16.6667	16.6667	16.6667	34.6675	16.6667	72.1137	50	34.6675	450	16.6667	34.6675	16.6667	450	72.1137	50	16.6667	16.6667	16.6667	34.6675	34.6675	34.6675	50	72.1137	50	16.6667	16.6667	16.6667	16.6667	16.6667	24.0379	104.002	150	34.6675	450	312.007	104.002
M776	24.0379	150	34.6675	312.007	104.002	450	16.6667	16.6667	50	50	24.0379	16.6667	16.6667	16.6667	34.6675	16.6667	24.0375	24.0379	312.007	24.0379	16.6667	16.6667	16.6667	16.6667	16.6667	16.6667	16.6667	34.6675	50	50	16.6667	16.6667	16.6667	34.6675	16.6667	24.0379
M777	34.6675	16.6667	34.6675	150	104.002	24.0379	24.0379	16.6667	50	16.6667	24.0379	24.0379	16.6667	16.6667	16.6667	16.6667	16.6667	312.007	24.0379	24.0379	24.0379	24.0379	24.0379	16.6667	16.6667	24.0379	24.0379	16.6667	16.6667	16.6667	16.6667	16.6667	16.6667	34.6675	34.6675	16.6667
M778	72.1137	50	34.6675	24.0379	150	150	50	16.6667	16.6667	16.6667	104.002	34.6675	34.6675	50	16.6667	16.6667	24.0375	16.6667	104.002	104.002	104.002	50	24.0379	104.002	34.6675	34.6675	34.6675	312.007	16.6667	16.6667	16.6667	34.6675	24.0379	24.0379	16.6667	24.0379
M779	24.0379	72.1137	34.6675	216.341	104.002	104.002	16.6667	16.6667	50	72.1137	24.0379	16.6667	16.6667	24.0379	16.6667	24.0379	16.6667	16.6667	24.0379	24.0379	24.0379	16.6667	16.6667	16.6667	24.0379	16.6667	16.6667	16.6667	72.1137	72.1137	24.0379	16.6667	50	24.0379	34.6675	50
M780	16.6667	72.1137	34.6675	16.6667	16.6667	216.341	24.0379	16.6667	34.6675	16.6667	16.6667	24.0379	24.0379	24.0379	16.6667	16.6667	16.6667	16.6667	16.6667	16.6667	16.6667	24.0379	24.0379	24.0379	24.0379	24.0379	16.6667	16.6667	16.6667	34.6675	34.6675	34.6675	50	50	50	16.6667
M781	50	216.341	450	72.1137	72.1137	72.1137	216.341	34.6675	34.6675	34.6675	72.1137	72.1137	312.007	104.002	50	34.6675	450	216.341	72.1137	72.1137	72.1137	216.341	216.341	16.6667	34.6675	72.1137	72.1137	34.6675	34.6675	34.6675	150	34.6675	72.1137	24.0379	72.1137	24.0379
M782	150	50	150	16.6667	34.6675	50	16.6667	50	450	24.0379	34.6675	50	216.341	104.002	34.6675	24.0379	16.6667	16.6667	34.6675	50	16.6667	16.6667	16.6667	16.6667	50	50	50	24.0379	24.0379	50	104.002	104.002	72.1137	450	150	150
M783	24.0379	16.6667	72.1137	16.6667	50	450	16.6667	24.0379	50	72.1137	24.0379	34.6675	24.0379	24.0379	16.6667	24.0379	16.6667	34.6675	24.0379	24.0379	34.6675	16.6667	72.1137	16.6667	34.6675	72.1137	34.6675	72.1137	16.6667	72.1137	34.6675	16.6667	16.6667	16.6667	50	34.6675
M784	34.6675	16.6667	72.1137	16.6667	16.6667	34.6675	16.6667	24.0379	50	16.6667	24.0379	16.6667	50	72.1137	16.6667	72.1137	34.6681	450	24.0379	24.0379	24.0379	16.6667	16.6667	16.6667	16.6667	16.6667	24.0379	16.6667	16.6667	16.6667	34.6675	24.0379	16.6667	34.6675	24.0379	50
M785	34.6675	24.0379	50	216.341	72.1137	24.0379	16.6667	16.6667	34.6675	24.0379	16.6667	16.6667	16.6667	16.6667	16.6667	16.6667	16.6667	450	16.6667	16.6667	16.6667	16.6667	16.6667	72.1137	34.6675	16.6667	16.6667	24.0379	24.0379	24.0379	16.6667	16.6667	16.6667	24.0379	16.6667	16.6667
M786	24.0379	16.6667	104.002	216.341	104.002	16.6667	24.0379	16.6667	34.6675	16.6667	104.002	24.0379	16.6667	24.0379	50	50	16.6667	50	104.002	104.002	104.002	24.0379	50	24.0379	34.6675	24.0379	24.0379	24.0379	16.6667	16.6667	24.0379	16.6667	16.6667	34.6675	24.0379	16.6667
M787	16.6667	72.1137	72.1137	16.6667	16.6667	216.341	24.0379	16.6667	34.6675	16.6667	16.6667	34.6675	50	50	16.6667	16.6667	24.0375	16.6667	16.6667	16.6667	16.6667	24.0379	24.0379	216.341	34.6675	34.6675	16.6667	16.6667	16.6667	16.6667	16.6667	24.0379	16.6667	16.6667	24.0379	24.0379
M788	16.6667	34.6675	72.1137	16.6667	50	150	16.6667	16.6667	50	72.1137	16.6667	50	16.6667	16.6667	16.6667	16.6667	16.6667	16.6667	16.6667	16.6667	104.002	16.6667	16.6667	34.6675	50	150	50	72.1137	24.0379	72.1137	24.0379	24.0379	16.6667	24.0379	50	24.0379
M789	24.0379	16.6667	34.6675	72.1137	34.6675	104.002	50	24.0379	24.0379	24.0379	24.0379	72.1137	104.002	24.0379	72.1137	104.002	104.004	24.0379	24.0379	24.0379	24.0379	24.0379	50	216.341	16.6667	72.1137	72.1137	16.6667	24.0379	24.0379	450	450	16.6667	150	216.341	24.0379
M790	150	50	16.6667	34.6675	50	104.002	50	16.6667	50	34.6675	24.0379	104.002	16.6667	24.0379	150	312.007	34.6681	150	24.0379	24.0379	24.0379	50	16.6667	16.6667	24.0379	104.002	104.002	34.6675	34.6675	34.6675	24.0379	104.002	216.341	16.6667	50	16.6667
M791	216.341	34.6675	216.341	34.6675	24.0379	72.1137	104.002	104.002	24.0379	16.6667	50	72.1137	104.002	72.1137	216.341	50	50	34.6675	50	50	34.6675	24.0379	104.002	312.007	72.1137	72.1137	72.1137	16.6667	72.1137	16.6667	16.6667	312.007	24.0379	34.6675	72.1137	16.6667
M792	34.6675	16.6667	24.0379	450	16.6667	72.1137	16.6667	16.6667	150	150	34.6675	24.0379	34.6675	24.0379	34.6675	50	16.6667	24.0379	34.6675	24.0379	34.6675	16.6667	16.6667	24.0379	24.0379	24.0379	16.6667	150	150	24.0379	34.6675	34.6675	16.6667	16.6667	34.6675	50
M793	16.6667	16.6667	50	72.1137	34.6675	24.0379	72.1137	16.6667	24.0379	50	312.007	16.6667	50	50	50	16.6667	34.6681	24.0379	104.002	312.007	16.6667	72.1137	72.1137	72.1137	16.6667	16.6667	16.6667	24.0379	50	50	16.6667	24.0379	16.6667	72.1137	72.1137	34.6675
M794	16.6667	24.0379	16.6667	50	16.6667	34.6675	24.0379	24.0379	24.0379	16.6667	16.6667	312.007	50	72.1137	16.6667	312.007	24.0375	150	34.6675	16.6667	16.6667	24.0379	24.0379	24.0379	312.007	150	312.007	16.6667	16.6667	16.6667	16.6667	16.6667	16.6667	50	50	50
M795	16.6667	104.002	24.0379	16.6667	150	16.6667	24.0379	50	104.002	16.6667	16.6667	34.6675	16.6667	24.0379	16.6667	16.6667	16.6667	16.6667	16.6667	16.6667	24.0379	24.0379	34.6675	450	34.6675	34.6675	24.0379	16.6667	16.6667	24.0379	16.6667	16.6667	24.0379	16.6667	34.6675	16.6667
M796	16.6667	150	72.1137	16.6667	16.6667	150	24.0379	24.0379	34.6675	34.6675	16.6667	24.0379	16.6667	34.6675	34.6675	24.0379	50	24.0379	16.6667	450	50	24.0379	16.6667	34.6675	24.0379	50	24.0379	34.6675	50	34.6675	24.0379	16.6667	16.6667	34.6675	16.6667	50
M797	72.1137	24.0379	104.002	34.6675	34.6675	72.1137	24.0379	50	450	16.6667	24.0379	50	72.1137	150	34.6675	34.6675	50	34.6675	24.0379	16.6667	24.0379	24.0379	24.0379	34.6675	50	50	16.6667	16.6667	16.6667	24.0379	72.1137	312.007	216.341	150	50	150
M798	34.6675	16.6667	72.1137	16.6667	34.6675	104.002	16.6667	24.0379	50	50	16.6667	50	24.0379	34.6675	24.0379	24.0379	34.6681	34.6675	16.6667	104.002	16.6667	216.341	16.6667	16.6667	50	24.0379	50	50	34.6675	50	16.6667	16.6667	24.0379	16.6667	34.6675	24.0379
M799	50	24.0379	312.007	312.007	50	72.1137	72.1137	24.0379	16.6667	16.6667	24.0379	104.002	104.002	312.007	104.002	16.6667	104.004	50	24.0379	24.0379	24.0379	72.1137	72.1137	50	24.0379	104.002	104.002	24.0379	16.6667	16.6667	150	216.341	150	24.0379	16.6667	216.341
M800	450	34.6675	312.007	34.6675	24.0379	72.1137	72.1137	72.1137	16.6667	16.6667	34.6675	450	72.1137	150	216.341	72.1137	72.1125	450	34.6675	34.6675	16.6667	72.1137	72.1137	72.1137	450	72.1137	450	16.6667	16.6667	16.6667	16.6667	104.002	16.6667	50	72.1137	16.6667
M801	72.1137	34.6675	16.6667	50	34.6675	104.002	104.002	24.0379	50	34.6675	24.0379	104.002	72.1137	104.002	72.1137	72.1137	50	150	24.0379	50	72.1137	104.002	104.002	104.002	16.6667	104.002	104.002	16.6667	34.6675	34.6675	50	312.007	150	16.6667	72.1137	24.0379
M802	24.0379	34.6675	50	150	104.002	216.341	24.0379	16.6667	34.6675	216.341	24.0379	50	34.6675	16.6667	24.0379	24.0379	16.6667	34.6675	24.0379	16.6667	150	24.0379	24.0379	24.0379	104.002	50	50	34.6675	216.341	216.341	34.6675	24.0379	16.6667	16.6667	16.6667	34.6675
M803	450	34.6675	216.341	34.6675	24.0379	72.1137	72.1137	104.002	50	24.0379	34.6675	104.002	104.002	150	150	50	50	450	34.6675	34.6675	150	72.1137	34.6675	72.1137	104.002	16.6667	104.002	24.0379	50	24.0379	24.0379	312.007	50	50	50	24.0379
M804	24.0379	16.6667	50	16.6667	16.6667	150	16.6667	16.6667	150	72.1137	24.0379	24.0379	24.0379	24.0379	24.0379	50	16.6667	16.6667	24.0379	16.6667	16.6667	16.6667	16.6667	16.6667	24.0379	24.0379	34.6675	72.1137	72.1137	72.1137	24.0379	34.6675	34.6675	34.6675	16.6667	16.6667
M805	72.1137	150	16.6667	34.6675	24.0379	104.002	50	24.0379	16.6667	24.0379	16.6667	104.002	50	16.6667	72.1137	450	34.6681	150	16.6667	24.0379	16.6667	50	50	50	104.002	50	104.002	24.0379	16.6667	24.0379	34.6675	72.1137	104.002	16.6667	16.6667	24.0379
M806	72.1137	34.6675	450	72.1137	50	72.1137	312.007	34.6675	34.6675	24.0379	104.002	72.1137	104.002	72.1137	16.6667	16.6667	312.013	50	104.002	104.002	16.6667	104.002	312.007	72.1137	72.1137	50	72.1137	24.0379	24.0379	24.0379	104.002	50	34.6675	24.0379	16.6667	72.1137
M807	24.0379	24.0379	150	150	50	72.1137	150	24.0379	16.6667	16.6667	24.0379	24.0379	50	24.0379	150	72.1137	150	24.0379	24.0379	24.0379	24.0379	16.6667	150	16.6667	34.6675	24.0379	24.0379	16.6667	16.6667	16.6667	150	312.007	104.002	312.007	150	104.002
M808	104.002	34.6675	104.002	16.6667	50	104.002	16.6667	50	312.007	16.6667	24.0379	50	50	24.0379	34.6675	34.6675	16.6667	34.6675	24.0379	24.0379	50	16.6667	16.6667	16.6667	50	50	24.0379	16.6667	16.6667	50	24.0379	150	104.002	16.6667	72.1137	24.0379
M809	34.6675	50	312.007	312.007	72.1137	72.1137	216.341	24.0379	16.6667	24.0379	34.6675	72.1137	72.1137	450	72.1137	24.0379	72.1125	72.1137	16.6667	34.6675	34.6675	216.341	216.341	216.341	34.6675	72.1137	72.1137	24.0379	24.0379	24.0379	150	216.341	104.002	16.6667	72.1137	50
M810	34.6675	24.0379	150	72.1137	34.6675	72.1137	72.1137	24.0379	24.0379	16.6667	24.0379	104.002	216.341	34.6675	104.002	312.007	450	24.0379	24.0379	24.0379	104.002	150	104.002	24.0379	24.0379	104.002	104.002	16.6667	16.6667	16.6667	72.1137	104.002	72.1137	216.341	150	104.002
M811	34.6675	16.6667	50	16.6667	16.6667	150	34.6675	24.0379	24.0379	72.1137	16.6667	16.6667	24.0379	24.0379	16.6667	50	50	72.1137	16.6667	24.0379	16.6667	34.6675	34.6675	24.0379	16.6667	16.6667	50	72.1137	72.1137	34.6675	72.1137	34.6675	16.6667	72.1137	34.6675	16.6667
M812	24.0379	16.6667	72.1137	72.1137	34.6675	72.1137	50	24.0379	24.0379	24.0379	24.0379	216.341	216.341	16.6667	72.1137	104.002	104.004	24.0379	24.0379	24.0379	16.6667	50	50	50	24.0379	216.341	216.341	50	24.0379	24.0379	72.1137	216.341	34.6675	150	312.007	24.0379
M813	16.6667	216.341	72.1137	104.002	104.002	216.341	24.0379	16.6667	34.6675	150	24.0379	34.6675	34.6675	24.0379	24.0379	16.6667	34.6681	16.6667	24.0379	24.0379	24.0379	24.0379	24.0379	34.6675	50	34.6675	34.6675	72.1137	150	150	16.6667	16.6667	16.6667	16.6667	16.6667	50
M814	34.6675	24.0379	312.007	16.6667	16.6667	50	16.6667	34.6675	150	24.0379	34.6675	34.6675	72.1137	24.0379	24.0379	24.0379	24.0375	24.0379	34.6675	24.0379	104.002	16.6667	16.6667	16.6667	34.6675	34.6675	34.6675	24.0379	24.0379	34.6675	72.1137	450	72.1137	150	150	16.6667
M815	50	50	150	50	50	50	150	312.007	16.6667	150	72.1137	450	150	72.1137	72.1137	50	72.1125	24.0379	72.1137	16.6667	72.1137	150	16.6667	24.0379	450	72.1137	450	150	104.002	150	34.6675	72.1137	72.1137	104.002	34.6675	104.002
M816	50	104.002	34.6675	24.0379	150	150	72.1137	16.6667	16.6667	16.6667	104.002	16.6667	16.6667	24.0379	16.6667	16.6667	16.6667	16.6667	104.002	104.002	16.6667	72.1137	72.1137	72.1137	16.6667	16.6667	16.6667	16.6667	16.6667	16.6667	34.6675	24.0379	50	24.0379	16.6667	50
M817	34.6675	16.6667	34.6675	16.6667	16.6667	150	34.6675	16.6667	72.1137	24.0379	16.6667	16.6667	24.0379	24.0379	16.6667	50	16.6667	24.0379	16.6667	24.0379	16.6667	34.6675	16.6667	34.6675	16.6667	16.6667	16.6667	24.0379	24.0379	16.6667	16.6667	24.0379	24.0379	24.0379	24.0379	50
M818	72.1137	34.6675	312.007	104.002	72.1137	104.002	216.341	24.0379	16.6667	16.6667	72.1137	104.002	104.002	104.002	150	72.1137	150	50	72.1137	72.1137	72.1137	216.341	216.341	50	16.6667	104.002	104.002	72.1137	16.6667	16.6667	16.6667	16.6667	216.341	16.6667	72.1137	450
M819	16.6667	312.007	34.6675	16.6667	24.0379	16.6667	24.0379	72.1137	16.6667	24.0379	16.6667	24.0379	16.6667	16.6667	104.002	16.6667	16.6667	16.6667	16.6667	24.0379	16.6667	24.0379	24.0379	24.0379	24.0379	24.0379	16.6667	24.0379	24.0379	16.6667	34.6675	34.6675	16.6667	24.0379	16.6667	24.0379
M820	16.6667	16.6667	16.6667	16.6667	16.6667	24.0379	16.6667	150	72.1137	34.6675	72.1137	312.007	50	50	16.6667	34.6675	104.004	24.0379	72.1137	72.1137	72.1137	16.6667	16.6667	24.0379	312.007	34.6675	312.007	34.6675	16.6667	34.6675	24.0379	16.6667	24.0379	24.0379	34.6675	16.6667
M821	104.002	104.002	34.6675	24.0379	72.1137	150	24.0379	24.0379	16.6667	34.6675	104.002	34.6675	34.6675	16.6667	24.0379	16.6667	24.0375	16.6667	104.002	104.002	34.6675	24.0379	24.0379	24.0379	24.0379	34.6675	34.6675	24.0379	34.6675	34.6675	34.6675	24.0379	16.6667	24.0379	16.6667	16.6667
M822	16.6667	34.6675	150	34.6675	34.6675	50	72.1137	312.007	16.6667	72.1137	72.1137	72.1137	72.1137	16.6667	50	104.002	104.004	150	72.1137	72.1137	72.1137	72.1137	72.1137	72.1137	72.1137	312.007	72.1137	72.1137	16.6667	72.1137	104.002	34.6675	150	24.0379	104.002	24.0379
M823	72.1137	150	450	50	50	72.1137	16.6667	34.6675	50	50	34.6675	104.002	450	216.341	50	24.0379	104.004	312.007	34.6675	34.6675	34.6675	34.6675	16.6667	16.6667	34.6675	104.002	104.002	16.6667	50	50	104.002	72.1137	72.1137	24.0379	150	34.6675
M824	312.007	34.6675	450	50	34.6675	50	312.007	34.6675	24.0379	16.6667	72.1137	72.1137	50	216.341	72.1137	24.0379	104.004	72.1137	72.1137	72.1137	72.1137	312.007	312.007	72.1137	72.1137	16.6667	72.1137	16.6667	24.0379	16.6667	34.6675	16.6667	150	34.6675	104.002	50
M825	24.0379	50	50	150	104.002	312.007	16.6667	16.6667	24.0379	34.6675	34.6675	24.0379	24.0379	50	16.6667	24.0379	24.0375	24.0379	450	34.6675	50	16.6667	16.6667	16.6667	16.6667	24.0379	24.0379	16.6667	34.6675	34.6675	16.6667	16.6667	34.6675	50	34.6675	16.6667
M826	50	34.6675	150	24.0379	24.0379	24.0379	34.6675	50	24.0379	24.0379	50	16.6667	34.6675	50	150	72.1137	72.1125	34.6675	50	50	24.0379	34.6675	50	34.6675	16.6667	16.6667	16.6667	24.0379	24.0379	16.6667	16.6667	24.0379	72.1137	24.0379	72.1137	72.1137
M827	16.6667	312.007	72.1137	16.6667	24.0379	150	16.6667	24.0379	34.6675	16.6667	16.6667	16.6667	24.0379	16.6667	24.0379	24.0379	16.6667	16.6667	16.6667	16.6667	16.6667	16.6667	16.6667	34.6675	16.6667	150	16.6667	16.6667	312.007	16.6667	24.0379	50	16.6667	16.6667	34.6675	50
M828	72.1137	50	104.002	50	34.6675	34.6675	50	50	104.002	16.6667	24.0379	34.6675	312.007	150	72.1137	16.6667	104.004	72.1137	24.0379	16.6667	24.0379	50	50	50	34.6675	34.6675	16.6667	16.6667	16.6667	34.6675	216.341	104.002	450	150	104.002	450
M829	50	34.6675	16.6667	72.1137	72.1137	50	50	16.6667	24.0379	216.341	16.6667	16.6667	50	450	216.341	24.0379	50	72.1137	16.6667	16.6667	24.0379	72.1137	24.0379	50	16.6667	16.6667	16.6667	16.6667	216.341	216.341	72.1137	104.002	312.007	450	24.0379	150
M830	16.6667	16.6667	16.6667	16.6667	16.6667	16.6667	16.6667	16.6667	16.6667	16.6667	16.6667	16.6667	16.6667	16.6667	16.6667	16.6667	16.6667	16.6667	16.6667	16.6667	16.6667	16.6667	16.6667	16.6667	16.6667	16.6667	16.6667	16.6667	16.6667	16.6667	16.6667	16.6667	16.6667	16.6667	16.6667	16.6667
M831	72.1137	150	216.341	50	50	50	24.0379	34.6675	50	150	24.0379	24.0379	72.1137	216.341	72.1137	34.6675	16.6667	104.002	24.0379	16.6667	24.0379	24.0379	24.0379	150	34.6675	24.0379	24.0379	216.341	150	150	312.007	312.007	104.002	150	104.002	104.002
M832	72.1137	104.002	450	150	72.1137	72.1137	104.002	34.6675	24.0379	24.0379	50	72.1137	216.341	216.341	24.0379	24.0379	312.013	72.1137	24.0379	50	50	104.002	16.6667	24.0379	34.6675	72.1137	72.1137	72.1137	24.0379	24.0379	72.1137	50	16.6667	50	16.6667	72.1137
M833	216.341	50	24.0379	24.0379	34.6675	104.002	450	34.6675	24.0379	24.0379	104.002	150	50	104.002	16.6667	16.6667	72.1125	216.341	104.002	104.002	24.0379	450	450	450	150	312.007	150	24.0379	104.002	24.0379	16.6667	16.6667	34.6675	34.6675	16.6667	24.0379
M834	34.6675	16.6667	50	150	72.1137	150	16.6667	16.6667	24.0379	24.0379	34.6675	24.0379	34.6675	16.6667	16.6667	24.0379	16.6667	34.6675	34.6675	16.6667	34.6675	16.6667	16.6667	16.6667	16.6667	24.0379	24.0379	24.0379	24.0379	24.0379	24.0379	24.0379	16.6667	16.6667	16.6667	16.6667
M835	24.0379	150	34.6675	216.341	104.002	216.341	16.6667	16.6667	34.6675	34.6675	72.1137	24.0379	24.0379	16.6667	24.0379	16.6667	16.6667	24.0379	312.007	216.341	72.1137	16.6667	16.6667	16.6667	24.0379	24.0379	24.0379	16.6667	34.6675	34.6675	16.6667	34.6675	24.0379	16.6667	16.6667	16.6667
M836	16.6667	16.6667	16.6667	16.6667	16.6667	16.6667	16.6667	16.6667	16.6667	16.6667	16.6667	16.6667	16.6667	16.6667	16.6667	16.6667	16.6667	16.6667	16.6667	16.6667	16.6667	16.6667	16.6667	16.6667	16.6667	16.6667	16.6667	16.6667	16.6667	16.6667	16.6667	16.6667	16.6667	16.6667	16.6667	16.6667
M837	34.6675	150	104.002	34.6675	16.6667	50	104.002	72.1137	312.007	50	34.6675	50	72.1137	150	72.1137	72.1137	150	104.002	34.6675	34.6675	34.6675	104.002	104.002	104.002	50	450	50	50	16.6667	50	34.6675	450	34.6675	34.6675	104.002	50
M838	104.002	24.0379	16.6667	24.0379	34.6675	34.6675	16.6667	16.6667	34.6675	150	72.1137	72.1137	24.0379	16.6667	104.002	216.341	24.0375	50	72.1137	72.1137	72.1137	16.6667	34.6675	34.6675	50	72.1137	72.1137	50	150	150	34.6675	24.0379	16.6667	50	34.6675	72.1137
M839	16.6667	150	50	16.6667	16.6667	216.341	24.0379	24.0379	24.0379	16.6667	16.6667	16.6667	16.6667	24.0379	24.0379	34.6675	34.6681	34.6675	16.6667	16.6667	104.002	24.0379	24.0379	216.341	16.6667	16.6667	16.6667	16.6667	16.6667	16.6667	34.6675	24.0379	34.6675	24.0379	50	16.6667
M840	16.6667	150	50	16.6667	16.6667	150	24.0379	24.0379	24.0379	50	16.6667	24.0379	16.6667	50	24.0379	34.6675	24.0375	34.6675	16.6667	16.6667	16.6667	24.0379	24.0379	24.0379	24.0379	24.0379	50	50	50	24.0379	50	16.6667	16.6667	16.6667	24.0379	34.6675
M841	16.6667	50	16.6667	34.6675	24.0379	104.002	16.6667	72.1137	104.002	72.1137	16.6667	312.007	150	16.6667	34.6675	50	72.1125	50	16.6667	16.6667	450	16.6667	16.6667	16.6667	312.007	24.0379	312.007	72.1137	34.6675	72.1137	150	24.0379	16.6667	72.1137	24.0379	16.6667
M842	50	216.341	450	72.1137	72.1137	72.1137	72.1137	34.6675	50	34.6675	50	104.002	450	104.002	50	24.0379	216.337	216.341	50	50	50	72.1137	72.1137	104.002	16.6667	104.002	104.002	34.6675	34.6675	34.6675	312.007	24.0379	34.6675	16.6667	150	24.0379
M843	72.1137	72.1137	24.0379	24.0379	104.002	150	34.6675	16.6667	16.6667	16.6667	104.002	16.6667	24.0379	16.6667	16.6667	16.6667	16.6667	16.6667	104.002	104.002	104.002	34.6675	24.0379	50	24.0379	16.6667	16.6667	72.1137	16.6667	16.6667	24.0379	16.6667	24.0379	24.0379	34.6675	16.6667
M844	16.6667	16.6667	150	72.1137	50	104.002	104.002	150	50	34.6675	34.6675	104.002	216.341	150	312.007	16.6667	104.004	150	16.6667	16.6667	216.341	104.002	104.002	216.341	104.002	72.1137	104.002	34.6675	24.0379	34.6675	312.007	216.341	72.1137	216.341	72.1137	216.341
M845	50	34.6675	72.1137	50	34.6675	104.002	104.002	104.002	50	50	34.6675	50	216.341	216.341	150	34.6675	104.004	104.002	34.6675	34.6675	34.6675	104.002	104.002	104.002	50	216.341	50	50	16.6667	50	450	216.341	72.1137	150	104.002	216.341
M846	34.6675	24.0379	72.1137	16.6667	16.6667	34.6675	16.6667	24.0379	50	34.6675	16.6667	50	16.6667	34.6675	16.6667	34.6675	16.6667	34.6675	16.6667	72.1137	150	16.6667	24.0379	50	50	72.1137	50	34.6675	24.0379	34.6675	34.6675	16.6667	16.6667	24.0379	24.0379	16.6667
M847	24.0379	24.0379	50	16.6667	16.6667	104.002	24.0379	34.6675	24.0379	34.6675	16.6667	16.6667	24.0379	24.0379	24.0379	16.6667	72.1125	72.1137	16.6667	16.6667	50	24.0379	24.0379	34.6675	16.6667	16.6667	24.0379	34.6675	34.6675	16.6667	24.0379	34.6675	16.6667	16.6667	34.6675	16.6667
M848	24.0379	34.6675	50	16.6667	16.6667	216.341	16.6667	16.6667	34.6675	16.6667	16.6667	16.6667	16.6667	34.6675	34.6675	16.6667	34.6681	34.6675	16.6667	16.6667	50	50	16.6667	16.6667	16.6667	16.6667	16.6667	16.6667	16.6667	16.6667	34.6675	34.6675	34.6675	34.6675	24.0379	16.6667
M849	104.002	34.6675	216.341	24.0379	34.6675	34.6675	72.1137	104.002	24.0379	34.6675	50	72.1137	104.002	16.6667	312.007	72.1137	50	24.0379	50	16.6667	72.1137	72.1137	72.1137	34.6675	72.1137	104.002	72.1137	34.6675	16.6667	34.6675	16.6667	450	50	16.6667	16.6667	16.6667
M850	24.0379	104.002	50	104.002	104.002	312.007	16.6667	16.6667	34.6675	24.0379	72.1137	24.0379	16.6667	16.6667	34.6675	16.6667	16.6667	16.6667	72.1137	72.1137	216.341	16.6667	16.6667	16.6667	24.0379	24.0379	24.0379	450	24.0379	24.0379	16.6667	16.6667	16.6667	34.6675	50	16.6667
M851	72.1137	104.002	312.007	104.002	50	24.0379	312.007	24.0379	16.6667	24.0379	34.6675	150	72.1137	104.002	150	72.1137	104.004	50	34.6675	34.6675	34.6675	312.007	312.007	50	150	216.341	150	24.0379	16.6667	24.0379	50	50	312.007	16.6667	104.002	312.007
M852	72.1137	50	104.002	34.6675	24.0379	34.6675	104.002	104.002	16.6667	50	50	72.1137	216.341	34.6675	50	150	312.013	150	50	150	50	104.002	104.002	34.6675	72.1137	216.341	72.1137	50	24.0379	50	216.341	72.1137	150	216.341	216.341	150
M853	24.0379	34.6675	104.002	104.002	34.6675	34.6675	72.1137	72.1137	24.0379	24.0379	34.6675	216.341	150	24.0379	72.1137	104.002	104.004	50	34.6675	312.007	34.6675	16.6667	72.1137	72.1137	216.341	104.002	216.341	24.0379	24.0379	24.0379	72.1137	312.007	34.6675	150	104.002	16.6667
M854	24.0379	72.1137	34.6675	216.341	104.002	150	16.6667	16.6667	34.6675	50	24.0379	16.6667	16.6667	16.6667	34.6675	16.6667	16.6667	24.0379	24.0379	24.0379	24.0379	16.6667	16.6667	16.6667	24.0379	16.6667	16.6667	50	50	50	24.0379	34.6675	16.6667	50	16.6667	24.0379
M855	24.0379	24.0379	34.6675	16.6667	16.6667	150	34.6675	16.6667	24.0379	16.6667	16.6667	16.6667	24.0379	24.0379	16.6667	16.6667	16.6667	24.0379	16.6667	16.6667	16.6667	72.1137	34.6675	34.6675	16.6667	16.6667	50	16.6667	16.6667	24.0379	50	16.6667	16.6667	50	24.0379	16.6667
M856	34.6675	16.6667	16.6667	16.6667	34.6675	16.6667	34.6675	104.002	34.6675	16.6667	16.6667	150	24.0379	50	34.6675	50	50	312.007	16.6667	24.0379	24.0379	34.6675	34.6675	16.6667	150	50	150	16.6667	16.6667	16.6667	16.6667	34.6675	16.6667	34.6675	24.0379	34.6675
M857	16.6667	34.6675	50	16.6667	16.6667	104.002	24.0379	24.0379	34.6675	34.6675	16.6667	24.0379	16.6667	72.1137	16.6667	34.6675	24.0375	34.6675	16.6667	450	16.6667	24.0379	24.0379	104.002	24.0379	50	24.0379	34.6675	24.0379	34.6675	34.6675	24.0379	34.6675	24.0379	24.0379	24.0379
M858	34.6675	16.6667	50	16.6667	16.6667	104.002	24.0379	24.0379	72.1137	24.0379	24.0379	16.6667	34.6675	16.6667	34.6675	72.1137	34.6681	50	24.0379	24.0379	34.6675	24.0379	24.0379	24.0379	16.6667	16.6667	16.6667	24.0379	24.0379	24.0379	50	16.6667	16.6667	72.1137	16.6667	72.1137
M859	16.6667	24.0379	104.002	72.1137	50	72.1137	72.1137	24.0379	24.0379	16.6667	24.0379	16.6667	50	16.6667	104.002	104.002	104.004	16.6667	24.0379	24.0379	24.0379	72.1137	72.1137	72.1137	24.0379	16.6667	16.6667	16.6667	16.6667	16.6667	150	312.007	72.1137	216.341	150	16.6667
M860	24.0379	150	72.1137	104.002	72.1137	312.007	16.6667	16.6667	34.6675	104.002	34.6675	34.6675	34.6675	24.0379	16.6667	16.6667	16.6667	16.6667	34.6675	34.6675	16.6667	16.6667	16.6667	16.6667	16.6667	34.6675	34.6675	104.002	104.002	104.002	24.0379	16.6667	24.0379	34.6675	16.6667	24.0379
M861	104.002	34.6675	450	72.1137	50	72.1137	104.002	34.6675	34.6675	24.0379	104.002	50	104.002	104.002	16.6667	34.6675	312.013	312.007	104.002	24.0379	104.002	104.002	34.6675	104.002	50	312.007	50	24.0379	24.0379	24.0379	72.1137	34.6675	16.6667	72.1137	24.0379	50
M862	50	72.1137	450	72.1137	72.1137	72.1137	216.341	34.6675	34.6675	34.6675	24.0379	104.002	104.002	150	34.6675	34.6675	104.004	216.341	16.6667	24.0379	24.0379	72.1137	216.341	216.341	24.0379	104.002	104.002	34.6675	34.6675	34.6675	450	104.002	34.6675	24.0379	104.002	50
M863	16.6667	16.6667	16.6667	16.6667	16.6667	16.6667	16.6667	16.6667	16.6667	16.6667	16.6667	16.6667	16.6667	16.6667	16.6667	16.6667	16.6667	16.6667	16.6667	16.6667	16.6667	16.6667	16.6667	16.6667	16.6667	16.6667	16.6667	16.6667	16.6667	16.6667	16.6667	16.6667	16.6667	16.6667	16.6667	16.6667
M864	16.6667	216.341	50	16.6667	16.6667	216.341	34.6675	24.0379	16.6667	72.1137	16.6667	16.6667	24.0379	34.6675	16.6667	34.6675	16.6667	34.6675	16.6667	16.6667	16.6667	34.6675	34.6675	34.6675	16.6667	16.6667	16.6667	72.1137	72.1137	24.0379	24.0379	16.6667	34.6675	16.6667	34.6675	16.6667
M865	312.007	50	150	24.0379	16.6667	34.6675	24.0379	50	16.6667	16.6667	34.6675	24.0379	72.1137	216.341	216.341	34.6675	150	450	34.6675	34.6675	34.6675	24.0379	24.0379	34.6675	24.0379	24.0379	50	16.6667	16.6667	24.0379	104.002	50	16.6667	24.0379	312.007	50
M866	216.341	34.6675	16.6667	34.6675	50	50	24.0379	16.6667	24.0379	312.007	50	72.1137	16.6667	50	450	50	34.6681	34.6675	24.0379	16.6667	50	450	24.0379	312.007	24.0379	72.1137	72.1137	50	312.007	312.007	24.0379	72.1137	150	50	50	104.002
M867	50	72.1137	450	72.1137	72.1137	50	72.1137	34.6675	34.6675	50	24.0379	50	104.002	216.341	24.0379	16.6667	104.004	104.002	24.0379	24.0379	24.0379	72.1137	72.1137	72.1137	24.0379	50	50	16.6667	50	50	150	104.002	16.6667	72.1137	216.341	16.6667
M868	50	24.0379	216.341	50	50	50	104.002	104.002	50	34.6675	50	104.002	150	104.002	72.1137	72.1137	216.337	150	50	50	34.6675	104.002	104.002	312.007	104.002	50	104.002	34.6675	16.6667	34.6675	150	216.341	104.002	312.007	104.002	312.007
M869	24.0379	104.002	50	104.002	104.002	216.341	16.6667	16.6667	50	50	24.0379	16.6667	34.6675	24.0379	24.0379	16.6667	16.6667	16.6667	24.0379	104.002	34.6675	16.6667	16.6667	24.0379	16.6667	16.6667	16.6667	72.1137	50	50	16.6667	16.6667	16.6667	24.0379	16.6667	34.6675
M870	104.002	34.6675	150	34.6675	16.6667	34.6675	24.0379	34.6675	16.6667	16.6667	24.0379	24.0379	72.1137	312.007	216.341	50	216.337	104.002	24.0379	24.0379	104.002	24.0379	50	16.6667	24.0379	24.0379	24.0379	16.6667	16.6667	72.1137	104.002	50	24.0379	16.6667	312.007	34.6675
M871	24.0379	24.0379	50	16.6667	16.6667	216.341	16.6667	34.6675	24.0379	50	16.6667	16.6667	50	16.6667	24.0379	16.6667	50	72.1137	16.6667	16.6667	104.002	16.6667	16.6667	16.6667	16.6667	16.6667	16.6667	50	50	24.0379	16.6667	16.6667	34.6675	34.6675	24.0379	50
M872	16.6667	50	24.0379	50	34.6675	50	72.1137	72.1137	72.1137	24.0379	34.6675	72.1137	216.341	34.6675	34.6675	72.1137	50	50	34.6675	104.002	34.6675	72.1137	16.6667	16.6667	72.1137	50	72.1137	24.0379	34.6675	24.0379	104.002	150	34.6675	72.1137	16.6667	50
M873	34.6675	24.0379	216.341	150	50	72.1137	216.341	24.0379	16.6667	16.6667	24.0379	72.1137	104.002	16.6667	450	312.007	150	34.6675	24.0379	24.0379	16.6667	216.341	216.341	216.341	24.0379	72.1137	72.1137	16.6667	16.6667	16.6667	216.341	104.002	150	150	72.1137	104.002
M874	72.1137	72.1137	24.0379	24.0379	104.002	312.007	50	16.6667	16.6667	16.6667	104.002	34.6675	16.6667	34.6675	16.6667	16.6667	16.6667	16.6667	104.002	24.0379	16.6667	50	50	50	34.6675	34.6675	34.6675	72.1137	16.6667	16.6667	24.0379	24.0379	16.6667	24.0379	24.0379	34.6675
M875	34.6675	16.6667	104.002	72.1137	16.6667	34.6675	34.6675	24.0379	150	34.6675	24.0379	16.6667	24.0379	16.6667	16.6667	24.0379	24.0375	16.6667	24.0379	24.0379	24.0379	34.6675	34.6675	34.6675	16.6667	16.6667	16.6667	34.6675	34.6675	24.0379	16.6667	72.1137	16.6667	16.6667	16.6667	34.6675
M876	24.0379	34.6675	50	16.6667	16.6667	150	24.0379	24.0379	34.6675	16.6667	16.6667	16.6667	24.0379	16.6667	16.6667	16.6667	34.6681	50	16.6667	16.6667	72.1137	24.0379	24.0379	50	16.6667	16.6667	24.0379	16.6667	16.6667	34.6675	16.6667	24.0379	24.0379	16.6667	24.0379	24.0379
M877	34.6675	150	104.002	24.0379	16.6667	24.0379	150	72.1137	104.002	50	34.6675	72.1137	104.002	104.002	24.0379	150	150	216.341	72.1137	34.6675	34.6675	150	150	50	72.1137	72.1137	72.1137	50	50	50	72.1137	450	16.6667	24.0379	216.341	16.6667
M878	16.6667	24.0379	50	34.6675	50	16.6667	16.6667	72.1137	450	50	16.6667	16.6667	16.6667	50	50	34.6675	16.6667	216.341	16.6667	16.6667	16.6667	16.6667	16.6667	16.6667	16.6667	16.6667	16.6667	50	50	16.6667	16.6667	24.0379	24.0379	24.0379	34.6675	24.0379
M879	34.6675	24.0379	16.6667	50	24.0379	24.0379	50	24.0379	24.0379	24.0379	16.6667	150	24.0379	72.1137	72.1137	150	34.6681	150	16.6667	16.6667	16.6667	50	50	50	150	72.1137	150	24.0379	150	24.0379	24.0379	24.0379	104.002	34.6675	34.6675	50
M880	24.0379	16.6667	34.6675	104.002	312.007	312.007	16.6667	16.6667	34.6675	104.002	24.0379	50	16.6667	16.6667	34.6675	24.0379	16.6667	34.6675	24.0379	150	34.6675	16.6667	24.0379	16.6667	34.6675	50	50	50	104.002	104.002	16.6667	34.6675	16.6667	34.6675	24.0379	16.6667
M881	72.1137	34.6675	16.6667	50	34.6675	72.1137	34.6675	16.6667	24.0379	312.007	72.1137	72.1137	50	34.6675	104.002	104.002	34.6681	50	72.1137	72.1137	450	34.6675	34.6675	34.6675	34.6675	72.1137	72.1137	150	312.007	312.007	24.0379	72.1137	104.002	16.6667	16.6667	24.0379
M882	50	50	24.0379	24.0379	216.341	216.341	50	16.6667	16.6667	24.0379	104.002	50	16.6667	16.6667	24.0379	16.6667	16.6667	16.6667	104.002	50	104.002	50	50	24.0379	24.0379	50	50	312.007	24.0379	24.0379	16.6667	34.6675	24.0379	16.6667	16.6667	16.6667
M883	24.0379	72.1137	72.1137	150	72.1137	312.007	16.6667	16.6667	34.6675	24.0379	34.6675	24.0379	34.6675	16.6667	34.6675	16.6667	24.0375	16.6667	34.6675	34.6675	16.6667	16.6667	16.6667	16.6667	34.6675	24.0379	24.0379	24.0379	24.0379	24.0379	24.0379	34.6675	16.6667	16.6667	16.6667	34.6675
M884	216.341	34.6675	104.002	34.6675	24.0379	50	150	16.6667	50	216.341	72.1137	72.1137	50	216.341	72.1137	24.0379	104.004	72.1137	72.1137	72.1137	16.6667	150	150	16.6667	72.1137	104.002	72.1137	216.341	24.0379	216.341	16.6667	24.0379	312.007	72.1137	450	104.002
M885	72.1137	34.6675	104.002	16.6667	50	104.002	24.0379	50	312.007	16.6667	16.6667	34.6675	24.0379	24.0379	34.6675	34.6675	16.6667	34.6675	16.6667	50	16.6667	24.0379	150	24.0379	34.6675	34.6675	34.6675	16.6667	16.6667	150	24.0379	104.002	150	24.0379	34.6675	16.6667
M886	34.6675	24.0379	50	150	72.1137	150	16.6667	16.6667	34.6675	24.0379	50	24.0379	16.6667	34.6675	16.6667	24.0379	16.6667	34.6675	50	50	24.0379	104.002	16.6667	72.1137	24.0379	24.0379	24.0379	34.6675	24.0379	24.0379	24.0379	50	50	16.6667	24.0379	16.6667
M887	16.6667	104.002	50	16.6667	16.6667	150	24.0379	24.0379	50	50	16.6667	24.0379	34.6675	34.6675	34.6675	24.0379	50	24.0379	16.6667	16.6667	24.0379	24.0379	24.0379	16.6667	24.0379	24.0379	16.6667	50	50	24.0379	16.6667	24.0379	16.6667	16.6667	16.6667	34.6675
M888	50	150	312.007	72.1137	72.1137	50	34.6675	24.0379	34.6675	104.002	24.0379	34.6675	72.1137	216.341	72.1137	16.6667	50	104.002	72.1137	24.0379	24.0379	34.6675	34.6675	24.0379	24.0379	34.6675	34.6675	16.6667	104.002	104.002	450	450	72.1137	104.002	216.341	50
M889	16.6667	312.007	72.1137	16.6667	24.0379	216.341	24.0379	24.0379	34.6675	24.0379	16.6667	16.6667	16.6667	34.6675	16.6667	24.0379	50	24.0379	16.6667	104.002	16.6667	34.6675	24.0379	50	16.6667	72.1137	16.6667	24.0379	24.0379	24.0379	16.6667	50	16.6667	34.6675	16.6667	16.6667
M890	24.0379	450	50	150	72.1137	216.341	16.6667	16.6667	34.6675	24.0379	50	24.0379	24.0379	34.6675	16.6667	16.6667	16.6667	24.0379	50	72.1137	50	16.6667	16.6667	16.6667	34.6675	24.0379	24.0379	24.0379	24.0379	24.0379	24.0379	16.6667	24.0379	50	34.6675	16.6667
M891	104.002	50	24.0379	16.6667	24.0379	50	104.002	16.6667	16.6667	104.002	104.002	72.1137	24.0379	72.1137	16.6667	72.1137	150	50	104.002	50	104.002	104.002	24.0379	24.0379	72.1137	104.002	72.1137	104.002	72.1137	104.002	16.6667	24.0379	16.6667	150	16.6667	24.0379
M892	216.341	72.1137	104.002	34.6675	34.6675	50	24.0379	24.0379	34.6675	50	24.0379	104.002	104.002	150	34.6675	16.6667	72.1125	104.002	312.007	24.0379	24.0379	24.0379	150	16.6667	104.002	104.002	104.002	24.0379	50	50	72.1137	150	72.1137	16.6667	104.002	72.1137
M893	24.0379	24.0379	72.1137	150	72.1137	104.002	16.6667	16.6667	24.0379	34.6675	34.6675	34.6675	16.6667	16.6667	50	34.6675	16.6667	50	34.6675	34.6675	50	16.6667	16.6667	50	50	34.6675	34.6675	16.6667	34.6675	34.6675	24.0379	34.6675	34.6675	34.6675	16.6667	16.6667
M894	24.0379	16.6667	24.0379	72.1137	34.6675	72.1137	50	24.0379	24.0379	24.0379	50	24.0379	312.007	16.6667	50	50	50	24.0379	50	50	16.6667	34.6675	50	450	16.6667	24.0379	24.0379	34.6675	24.0379	24.0379	312.007	150	24.0379	72.1137	150	24.0379
M895	24.0379	24.0379	50	16.6667	16.6667	216.341	24.0379	24.0379	16.6667	104.002	16.6667	16.6667	24.0379	16.6667	24.0379	16.6667	16.6667	72.1137	16.6667	16.6667	16.6667	24.0379	24.0379	24.0379	16.6667	16.6667	16.6667	104.002	104.002	16.6667	34.6675	24.0379	24.0379	50	24.0379	34.6675
M896	16.6667	72.1137	50	16.6667	16.6667	312.007	24.0379	16.6667	34.6675	16.6667	16.6667	24.0379	24.0379	34.6675	24.0379	16.6667	34.6681	24.0379	16.6667	34.6675	16.6667	24.0379	24.0379	450	24.0379	24.0379	16.6667	16.6667	16.6667	24.0379	24.0379	16.6667	24.0379	50	34.6675	72.1137
M897	16.6667	50	50	16.6667	24.0379	150	16.6667	24.0379	34.6675	34.6675	16.6667	16.6667	24.0379	34.6675	24.0379	24.0379	34.6681	16.6667	16.6667	16.6667	16.6667	16.6667	50	16.6667	16.6667	16.6667	16.6667	34.6675	104.002	34.6675	34.6675	50	24.0379	50	16.6667	34.6675
M898	312.007	50	216.341	34.6675	24.0379	24.0379	312.007	16.6667	16.6667	24.0379	104.002	216.341	24.0379	34.6675	24.0379	34.6675	450	34.6675	50	72.1137	72.1137	312.007	50	24.0379	216.341	24.0379	216.341	24.0379	16.6667	24.0379	16.6667	50	24.0379	72.1137	24.0379	34.6675
M899	16.6667	312.007	50	16.6667	16.6667	216.341	24.0379	16.6667	34.6675	16.6667	16.6667	16.6667	24.0379	16.6667	16.6667	34.6675	16.6667	24.0379	16.6667	16.6667	16.6667	24.0379	24.0379	24.0379	16.6667	16.6667	34.6675	16.6667	16.6667	50	16.6667	16.6667	24.0379	34.6675	16.6667	34.6675
M900	312.007	34.6675	34.6675	16.6667	50	72.1137	16.6667	50	312.007	16.6667	24.0379	50	72.1137	72.1137	50	16.6667	16.6667	34.6675	24.0379	24.0379	50	16.6667	16.6667	104.002	50	50	24.0379	16.6667	16.6667	16.6667	72.1137	216.341	104.002	104.002	16.6667	50
M901	150	34.6675	216.341	50	16.6667	72.1137	50	72.1137	50	34.6675	34.6675	72.1137	72.1137	216.341	104.002	72.1137	104.004	104.002	34.6675	34.6675	34.6675	50	50	50	72.1137	16.6667	72.1137	34.6675	34.6675	34.6675	24.0379	150	24.0379	24.0379	16.6667	72.1137
M902	24.0379	104.002	24.0379	24.0379	216.341	450	72.1137	16.6667	16.6667	24.0379	104.002	16.6667	24.0379	50	34.6675	16.6667	16.6667	16.6667	24.0379	34.6675	16.6667	72.1137	72.1137	216.341	16.6667	16.6667	16.6667	216.341	24.0379	24.0379	16.6667	24.0379	34.6675	24.0379	50	34.6675
M903	72.1137	50	312.007	216.341	72.1137	104.002	72.1137	34.6675	24.0379	16.6667	50	104.002	150	312.007	72.1137	16.6667	216.337	50	16.6667	50	50	72.1137	16.6667	24.0379	216.341	104.002	104.002	34.6675	16.6667	16.6667	72.1137	24.0379	150	72.1137	16.6667	150
M904	24.0379	50	34.6675	24.0379	24.0379	16.6667	24.0379	216.341	16.6667	34.6675	24.0379	34.6675	16.6667	16.6667	16.6667	16.6667	16.6667	16.6667	24.0379	24.0379	16.6667	24.0379	24.0379	150	34.6675	150	34.6675	34.6675	34.6675	34.6675	16.6667	24.0379	16.6667	24.0379	16.6667	16.6667
M905	104.002	72.1137	312.007	216.341	50	72.1137	72.1137	34.6675	24.0379	16.6667	50	72.1137	104.002	216.341	50	24.0379	312.013	72.1137	50	24.0379	24.0379	72.1137	72.1137	24.0379	72.1137	312.007	72.1137	16.6667	16.6667	16.6667	72.1137	72.1137	72.1137	16.6667	72.1137	50
M906	104.002	72.1137	216.341	72.1137	50	72.1137	150	104.002	72.1137	104.002	34.6675	72.1137	216.341	24.0379	24.0379	150	72.1125	104.002	34.6675	16.6667	34.6675	150	150	34.6675	72.1137	34.6675	72.1137	104.002	34.6675	104.002	72.1137	16.6667	150	216.341	104.002	104.002
M907	72.1137	50	34.6675	24.0379	150	312.007	50	16.6667	16.6667	34.6675	104.002	50	16.6667	16.6667	24.0379	16.6667	16.6667	16.6667	104.002	24.0379	72.1137	50	50	50	24.0379	50	50	24.0379	34.6675	34.6675	50	24.0379	34.6675	24.0379	50	16.6667
M908	16.6667	72.1137	16.6667	50	24.0379	50	72.1137	104.002	104.002	216.341	16.6667	216.341	216.341	50	50	72.1137	72.1125	312.007	16.6667	16.6667	16.6667	104.002	72.1137	24.0379	216.341	50	216.341	216.341	24.0379	216.341	150	104.002	50	16.6667	50	16.6667
M909	216.341	50	450	34.6675	24.0379	50	450	34.6675	50	24.0379	72.1137	50	72.1137	72.1137	16.6667	16.6667	150	34.6675	72.1137	72.1137	34.6675	104.002	450	24.0379	50	72.1137	50	24.0379	16.6667	24.0379	16.6667	24.0379	24.0379	34.6675	72.1137	34.6675
M910	104.002	24.0379	216.341	24.0379	34.6675	104.002	104.002	150	72.1137	72.1137	34.6675	450	150	312.007	104.002	50	72.1125	104.002	16.6667	34.6675	34.6675	104.002	104.002	104.002	450	450	450	72.1137	16.6667	72.1137	72.1137	216.341	34.6675	16.6667	34.6675	34.6675
M911	216.341	50	16.6667	50	34.6675	72.1137	34.6675	16.6667	34.6675	72.1137	34.6675	72.1137	16.6667	72.1137	450	104.002	24.0375	104.002	312.007	24.0379	34.6675	34.6675	34.6675	34.6675	24.0379	72.1137	72.1137	34.6675	72.1137	72.1137	50	104.002	150	34.6675	16.6667	24.0379
M912	34.6675	16.6667	50	24.0379	50	216.341	16.6667	24.0379	50	150	24.0379	34.6675	16.6667	16.6667	16.6667	24.0379	16.6667	34.6675	24.0379	24.0379	24.0379	16.6667	16.6667	24.0379	34.6675	72.1137	34.6675	150	16.6667	150	34.6675	50	16.6667	16.6667	24.0379	16.6667
M913	216.341	34.6675	312.007	72.1137	34.6675	24.0379	216.341	34.6675	16.6667	104.002	72.1137	150	50	312.007	104.002	16.6667	72.1125	72.1137	72.1137	72.1137	72.1137	216.341	216.341	216.341	150	312.007	150	104.002	216.341	104.002	50	16.6667	216.341	16.6667	150	216.341
M914	24.0379	24.0379	216.341	50	50	34.6675	72.1137	150	150	72.1137	34.6675	150	450	150	72.1137	50	104.004	150	34.6675	34.6675	34.6675	72.1137	50	72.1137	150	34.6675	150	72.1137	34.6675	72.1137	72.1137	216.341	50	34.6675	72.1137	16.6667
M915	104.002	34.6675	24.0379	50	34.6675	72.1137	16.6667	24.0379	34.6675	72.1137	34.6675	72.1137	72.1137	104.002	72.1137	50	16.6667	216.341	50	34.6675	34.6675	16.6667	16.6667	16.6667	150	72.1137	72.1137	50	72.1137	72.1137	34.6675	312.007	150	34.6675	16.6667	72.1137
M916	50	24.0379	34.6675	50	34.6675	104.002	150	216.341	50	72.1137	50	150	104.002	24.0379	16.6667	104.002	72.1125	104.002	50	50	50	16.6667	150	72.1137	150	34.6675	150	72.1137	16.6667	72.1137	50	50	150	24.0379	16.6667	72.1137

## Sheet: (b) Hodgkin local conc, nM
104.002	34.6675	16.6667	72.1137	72.1137	34.6675	24.0379	24.0379									24.0379	16.6667	16.6667	16.6667	16.6667	16.6667	34.6675	24.0379		34.6675	24.0379	16.6667	16.6667	24.0379	34.6675	72.1137	34.6675	50	24.0379	50	72.1137	104.002	16.6667	72.1137	24.0379	16.6667	16.6667	150	16.6667	16.6667	16.6667	24.0379	24.0379
16.6667	104.002	34.6675	24.0379	16.6667	16.6667	50	150									50	16.6667	16.6667	216.341	16.6667	216.341	34.6675	24.0379		16.6667	216.341	16.6667	34.6675	34.6675	34.6675	72.1137	24.0379	216.341	16.6667	24.0379	16.6667	34.6675	16.6667	16.6667	104.002	24.0379	16.6667	16.6667	16.6667	24.0379	24.0379	16.6667	24.0379
50	24.0379	34.6675	34.6675	72.1137	34.6675	34.6675	50									150	24.0379	16.6667	16.6667	50	104.002	16.6667	24.0379		16.6667	16.6667	50	24.0379	16.6667	104.002	34.6675	24.0379	24.0379	104.002	24.0379	312.007	16.6667	104.002	72.1137	24.0379	24.0379	16.6667	24.0379	16.6667	34.6675	16.6667	16.6667	24.0379
16.6667	24.0379	16.6667	50	50	216.341	24.0379	50									24.0379	34.6675	72.1137	24.0379	24.0379	16.6667	50	16.6667		34.6675	16.6667	16.6667	104.002	16.6667	16.6667	150	312.007	24.0379	104.002	72.1137	24.0379	16.6667	16.6667	16.6667	16.6667	16.6667	34.6675	16.6667	34.6675	16.6667	16.6667	16.6667	150
216.341	16.6667	34.6675	24.0379	150	16.6667	34.6675	16.6667									312.007	16.6667	16.6667	16.6667	150	24.0379	34.6675	34.6675		24.0379	24.0379	104.002	34.6675	34.6675	16.6667	16.6667	34.6675	16.6667	34.6675	16.6667	150	34.6675	50	50	24.0379	16.6667	24.0379	16.6667	50	34.6675	16.6667	104.002	24.0379
34.6675	50	72.1137	72.1137	50	24.0379	34.6675	16.6667									312.007	34.6675	150	24.0379	16.6667	24.0379	34.6675	24.0379		50	72.1137	16.6667	34.6675	72.1137	312.007	50	16.6667	24.0379	16.6667	16.6667	16.6667	16.6667	150	34.6675	16.6667	50	16.6667	50	16.6667	24.0379	34.6675	72.1137	104.002
312.007	34.6675	150	104.002	16.6667	16.6667	16.6667	16.6667	16.6667	16.6667	34.6675	24.0379	150	16.6667	104.002	16.6667	150	34.6675	16.6667	16.6667	16.6667	34.6675	24.0379	104.002		150	34.6675	34.6675	16.6667	24.0379	24.0379	104.002	34.6675	24.0379	16.6667	24.0379	104.002	150	34.6675	16.6667	50	16.6667	50	24.0379	16.6667	216.341	34.6675	34.6675	50
16.6667	16.6667	24.0379	34.6675	24.0379	34.6675	34.6675	16.6667	34.6675	34.6675	16.6667	16.6667	24.0379	24.0379	150	24.0379	16.6667	16.6667	34.6675	24.0379	16.6667	16.6667	24.0379	50		24.0379	50	104.002	72.1137	16.6667	72.1137	16.6667	16.6667	24.0379	34.6675	50	216.341	34.6675	16.6667	16.6667	34.6675	34.6675	16.6667	34.6675	24.0379	16.6667	72.1137	24.0379	24.0379
24.0379	104.002	72.1137	16.6667	24.0379	50	50	16.6667	16.6667	24.0379	24.0379	16.6667	34.6675	16.6667	104.002	24.0379	16.6667	104.002	24.0379	34.6675	34.6675	34.6675	24.0379	24.0379		16.6667	16.6667	72.1137	50	16.6667	104.002	216.341	16.6667									16.6667	16.6667	50	104.002	72.1137	24.0379	16.6667	24.0379
50	16.6667	104.002	150	24.0379	16.6667	24.0379	34.6675	50	16.6667	50	16.6667	16.6667	34.6675	312.007	16.6667	16.6667	24.0379	34.6675	24.0379	16.6667	24.0379	16.6667	24.0379		34.6675	16.6667	16.6667	16.6667	34.6675	16.6667	16.6667	24.0379									50	50	72.1137	16.6667	16.6667	104.002	50	72.1137
16.6667	72.1137	104.002	72.1137	72.1137	24.0379	16.6667	34.6675	16.6667	104.002	16.6667	24.0379	50	16.6667	16.6667	72.1137	50	34.6675	34.6675	24.0379	34.6675	24.0379	72.1137	24.0379		16.6667	104.002	312.007	34.6675	16.6667	34.6675	450	16.6667									16.6667	16.6667	16.6667	50	16.6667	24.0379	34.6675	24.0379
24.0379	16.6667	104.002	72.1137	34.6675	50	16.6667	24.0379	16.6667	24.0379	16.6667	16.6667	24.0379	16.6667	16.6667	50	16.6667	50	34.6675	16.6667	16.6667	24.0379	34.6675	50		24.0379	34.6675	34.6675	16.6667	34.6675	16.6667	216.341	24.0379									16.6667	24.0379	16.6667	72.1137	34.6675	16.6667	50	24.0379
34.6675	34.6675	16.6667	24.0379	16.6667	34.6675	16.6667	104.002	50	16.6667	16.6667	16.6667	16.6667	50	24.0379	50	72.1137	34.6675	24.0379	50	104.002	16.6667	16.6667	24.0379		72.1137	16.6667	16.6667	16.6667	16.6667	72.1137	16.6667	24.0379	16.6667	24.0379	50	34.6675	50	16.6667	450	16.6667	16.6667	16.6667	72.1137	72.1137	16.6667	16.6667	16.6667	24.0379
72.1137	216.341	150	50	24.0379	24.0379	216.341	150	16.6667	312.007	34.6675	216.341	50	150	16.6667	16.6667	16.6667	16.6667	16.6667	16.6667	16.6667	24.0379	24.0379	50		24.0379	72.1137	24.0379	104.002	16.6667	50	34.6675	104.002	24.0379	312.007	24.0379	16.6667	24.0379	16.6667	50	50	24.0379	16.6667	16.6667	34.6675	50	24.0379	50	104.002
16.6667	50	16.6667	34.6675	104.002	16.6667	16.6667	50	34.6675	104.002	450	450	450	34.6675	72.1137	24.0379	50	24.0379	16.6667	34.6675	24.0379	50	34.6675	34.6675		50	34.6675	16.6667	16.6667	72.1137	72.1137	72.1137	34.6675	16.6667	24.0379	24.0379	16.6667	72.1137	24.0379	16.6667	72.1137	24.0379	24.0379	16.6667	16.6667	16.6667	312.007	24.0379	50
50	104.002	72.1137	72.1137	16.6667	34.6675	16.6667	72.1137	34.6675	24.0379	72.1137	216.341	312.007	24.0379	24.0379	16.6667	16.6667	24.0379	16.6667	104.002	16.6667	50	24.0379	72.1137		34.6675	150	34.6675	16.6667	34.6675	150	16.6667	16.6667	24.0379	16.6667	16.6667	16.6667	312.007	16.6667	16.6667	24.0379	34.6675	72.1137	16.6667	24.0379	34.6675	34.6675	50	150
50	24.0379	34.6675	24.0379	16.6667	24.0379	24.0379	16.6667	150	216.341	312.007	50	450	24.0379	24.0379	72.1137	72.1137	16.6667	312.007	16.6667	16.6667	24.0379	34.6675	16.6667		16.6667	24.0379	104.002	16.6667	24.0379	34.6675	50	34.6675	16.6667	24.0379	16.6667	24.0379	24.0379	24.0379	16.6667	50	104.002	16.6667	312.007	16.6667	150	16.6667	24.0379	72.1137
24.0379	34.6675	24.0379	24.0379	34.6675	24.0379	16.6667	24.0379	16.6667	72.1137	150	450	24.0379	50	72.1137	24.0379	50	16.6667	34.6675	34.6675	104.002	16.6667	16.6667	16.6667		16.6667	216.341	24.0379	34.6675	24.0379	50	50	24.0379	16.6667	150	24.0379	150	34.6675	50	24.0379	50	16.6667	24.0379	24.0379	50	50	16.6667	24.0379	450
16.6667	104.002	50	34.6675	16.6667	34.6675	72.1137	24.0379									50	16.6667	24.0379	24.0379	72.1137	34.6675	216.341	50		24.0379	34.6675	50	16.6667	24.0379	24.0379	450	50									16.6667	16.6667	50	34.6675	34.6675	16.6667	16.6667	24.0379
24.0379	24.0379	34.6675	24.0379	16.6667	16.6667	16.6667	104.002									16.6667	24.0379	16.6667	34.6675	24.0379	16.6667	50	16.6667		312.007	72.1137	16.6667	34.6675	34.6675	150	16.6667	34.6675									24.0379	50	16.6667	50	16.6667	16.6667	150	24.0379
16.6667	50	312.007	16.6667	16.6667	16.6667	50	16.6667									16.6667	24.0379	16.6667	16.6667	16.6667	16.6667	312.007	50		16.6667	50	16.6667	24.0379	16.6667	34.6675	16.6667	104.002									72.1137	16.6667	16.6667	34.6675	16.6667	16.6667	34.6675	24.0379
34.6675	34.6675	16.6667	34.6675	16.6667	72.1137	16.6667	50									24.0379	24.0379	24.0379	450	24.0379	50	24.0379	72.1137		72.1137	216.341	24.0379	24.0379	34.6675	16.6667	34.6675	150									16.6667	312.007	24.0379	150	16.6667	104.002	50	150
150	34.6675	24.0379	16.6667	16.6667	24.0379	16.6667	24.0379									150	50	34.6675	16.6667	24.0379	312.007	34.6675	104.002		16.6667	16.6667	104.002	50	34.6675	24.0379	16.6667	50									24.0379	24.0379	24.0379	50	16.6667	16.6667	16.6667	34.6675
24.0379	16.6667	50	34.6675	24.0379	104.002	34.6675	150									16.6667	104.002	34.6675	24.0379	24.0379	50	34.6675	150		24.0379	16.6667	34.6675	216.341	16.6667	16.6667	72.1137	72.1137									16.6667	24.0379	16.6667	24.0379	150	104.002	24.0379	450
[truncated: 24 more columns]

## Sheet: (b) Avogadro local conc, nM
312.007	24.0379	450	16.6667	34.6675	216.341	34.6675	150									34.6675	34.6675	34.6675	16.6667	16.6667	16.6667	34.6675	150		150	16.6667	34.6675	16.6667	34.6675	216.341	50	72.1137	16.6667	24.0379	24.0379	16.6667	34.6675	16.6667	34.6675	24.0379	24.0379	24.0379	24.0379	72.1137	16.6667	34.6675	24.0379	150
16.6667	24.0379	34.6675	34.6675	16.6667	450	16.6667	34.6675									16.6667	34.6675	450	34.6675	312.007	50	16.6667	34.6675		24.0379	50	104.002	16.6667	16.6667	24.0379	50	72.1137	34.6675	24.0379	216.341	150	16.6667	104.002	150	72.1137	16.6667	104.002	16.6667	450	16.6667	450	50	24.0379
24.0379	16.6667	16.6667	16.6667	16.6667	16.6667	34.6675	72.1137									50	24.0379	24.0379	16.6667	16.6667	104.002	24.0379	16.6667		16.6667	216.341	16.6667	16.6667	150	104.002	24.0379	16.6667	24.0379	104.002	24.0379	24.0379	16.6667	24.0379	50	16.6667	16.6667	50	24.0379	16.6667	24.0379	24.0379	216.341	24.0379
24.0379	104.002	312.007	24.0379	16.6667	50	16.6667	24.0379									72.1137	16.6667	16.6667	16.6667	16.6667	150	16.6667	24.0379		16.6667	72.1137	312.007	34.6675	34.6675	16.6667	16.6667	34.6675	16.6667	72.1137	24.0379	24.0379	16.6667	104.002	72.1137	16.6667	24.0379	16.6667	16.6667	16.6667	16.6667	16.6667	16.6667	150
72.1137	34.6675	72.1137	34.6675	24.0379	104.002	50	24.0379									50	24.0379	34.6675	16.6667	150	24.0379	50	16.6667		24.0379	16.6667	34.6675	16.6667	24.0379	24.0379	16.6667	16.6667	104.002	16.6667	24.0379	34.6675	16.6667	16.6667	16.6667	24.0379	16.6667	50	72.1137	16.6667	16.6667	50	72.1137	16.6667
16.6667	34.6675	104.002	24.0379	104.002	16.6667	24.0379	34.6675									50	34.6675	16.6667	72.1137	16.6667	72.1137	24.0379	16.6667		16.6667	216.341	16.6667	16.6667	72.1137	104.002	72.1137	16.6667	150	50	16.6667	312.007	16.6667	216.341	24.0379	72.1137	16.6667	16.6667	24.0379	24.0379	16.6667	16.6667	104.002	50
50	34.6675	24.0379	16.6667	24.0379	16.6667	50	104.002	24.0379	72.1137	34.6675	16.6667	216.341	24.0379	50	24.0379	50	24.0379	24.0379	150	16.6667	16.6667	24.0379	24.0379		150	16.6667	16.6667	16.6667	16.6667	24.0379	450	16.6667	16.6667	24.0379	150	72.1137	50	16.6667	34.6675	50	72.1137	24.0379	24.0379	16.6667	150	24.0379	16.6667	24.0379
24.0379	104.002	24.0379	150	16.6667	24.0379	16.6667	16.6667	16.6667	16.6667	16.6667	24.0379	16.6667	16.6667	34.6675	16.6667	104.002	16.6667	24.0379	50	312.007	24.0379	312.007	34.6675		104.002	150	16.6667	50	72.1137	24.0379	72.1137	104.002	16.6667	50	16.6667	16.6667	24.0379	16.6667	104.002	34.6675	16.6667	450	24.0379	150	50	34.6675	16.6667	16.6667
24.0379	24.0379	34.6675	24.0379	24.0379	72.1137	24.0379	150	16.6667	24.0379	50	104.002	24.0379	24.0379	16.6667	16.6667	24.0379	72.1137	16.6667	24.0379	16.6667	16.6667	24.0379	16.6667		24.0379	34.6675	216.341	24.0379	24.0379	16.6667	50	50									72.1137	16.6667	34.6675	104.002	24.0379	104.002	72.1137	16.6667
24.0379	34.6675	104.002	24.0379	50	16.6667	104.002	72.1137	34.6675	16.6667	50	24.0379	50	24.0379	24.0379	34.6675	24.0379	16.6667	16.6667	16.6667	34.6675	24.0379	34.6675	24.0379		16.6667	16.6667	150	16.6667	16.6667	150	16.6667	24.0379									16.6667	50	16.6667	16.6667	16.6667	34.6675	34.6675	104.002
24.0379	104.002	34.6675	150	34.6675	34.6675	24.0379	50	24.0379	24.0379	16.6667	150	34.6675	450	72.1137	72.1137	50	216.341	16.6667	24.0379	34.6675	16.6667	24.0379	16.6667		24.0379	24.0379	216.341	24.0379	450	16.6667	50	24.0379									104.002	34.6675	16.6667	72.1137	16.6667	16.6667	16.6667	16.6667
16.6667	16.6667	24.0379	34.6675	24.0379	24.0379	24.0379	104.002	16.6667	16.6667	16.6667	16.6667	16.6667	150	16.6667	16.6667	104.002	50	16.6667	16.6667	450	104.002	16.6667	24.0379		72.1137	16.6667	16.6667	24.0379	50	216.341	16.6667	16.6667									16.6667	16.6667	16.6667	16.6667	34.6675	16.6667	24.0379	16.6667
72.1137	24.0379	150	24.0379	34.6675	16.6667	16.6667	104.002	150	16.6667	16.6667	16.6667	16.6667	16.6667	150	34.6675	24.0379	24.0379	72.1137	16.6667	72.1137	34.6675	16.6667	16.6667		50	24.0379	16.6667	16.6667	16.6667	104.002	16.6667	34.6675	450	16.6667	216.341	24.0379	50	24.0379	50	72.1137	312.007	312.007	50	16.6667	104.002	16.6667	16.6667	24.0379
16.6667	50	72.1137	16.6667	34.6675	16.6667	16.6667	34.6675	16.6667	50	24.0379	34.6675	24.0379	50	16.6667	24.0379	24.0379	16.6667	50	104.002	24.0379	24.0379	72.1137	24.0379		16.6667	50	16.6667	312.007	16.6667	16.6667	16.6667	34.6675	16.6667	50	16.6667	16.6667	16.6667	24.0379	104.002	24.0379	16.6667	16.6667	24.0379	24.0379	16.6667	16.6667	16.6667	50
16.6667	16.6667	34.6675	16.6667	50	72.1137	24.0379	24.0379	16.6667	16.6667	50	16.6667	50	16.6667	216.341	216.341	16.6667	16.6667	16.6667	24.0379	24.0379	24.0379	34.6675	312.007		34.6675	16.6667	16.6667	16.6667	150	150	34.6675	16.6667	16.6667	16.6667	216.341	34.6675	16.6667	24.0379	24.0379	104.002	24.0379	24.0379	16.6667	24.0379	24.0379	24.0379	24.0379	16.6667
16.6667	34.6675	104.002	24.0379	16.6667	16.6667	24.0379	72.1137	16.6667	16.6667	16.6667	16.6667	24.0379	16.6667	16.6667	34.6675	216.341	50	16.6667	24.0379	24.0379	34.6675	104.002	50		16.6667	50	16.6667	34.6675	16.6667	216.341	24.0379	72.1137	16.6667	24.0379	104.002	72.1137	24.0379	34.6675	50	16.6667	16.6667	16.6667	16.6667	50	34.6675	16.6667	16.6667	50
104.002	16.6667	16.6667	16.6667	312.007	24.0379	16.6667	16.6667	50	34.6675	34.6675	34.6675	34.6675	16.6667	24.0379	50	24.0379	16.6667	50	104.002	34.6675	34.6675	16.6667	50		34.6675	24.0379	50	72.1137	104.002	24.0379	24.0379	24.0379	216.341	312.007	34.6675	16.6667	34.6675	16.6667	24.0379	104.002	72.1137	24.0379	50	104.002	24.0379	16.6667	16.6667	72.1137
16.6667	50	16.6667	16.6667	16.6667	24.0379	16.6667	24.0379	104.002	24.0379	50	34.6675	16.6667	72.1137	50	34.6675	16.6667	104.002	24.0379	16.6667	72.1137	24.0379	16.6667	16.6667		16.6667	34.6675	24.0379	16.6667	16.6667	16.6667	16.6667	24.0379	24.0379	34.6675	16.6667	34.6675	104.002	16.6667	16.6667	50	104.002	24.0379	34.6675	34.6675	16.6667	72.1137	72.1137	34.6675
16.6667	16.6667	16.6667	16.6667	16.6667	16.6667	34.6675	24.0379									50	16.6667	16.6667	16.6667	34.6675	16.6667	50	16.6667		312.007	16.6667	24.0379	24.0379	24.0379	16.6667	216.341	72.1137									450	450	216.341	216.341	312.007	450	24.0379	16.6667
216.341	72.1137	34.6675	16.6667	72.1137	16.6667	16.6667	216.341									16.6667	72.1137	16.6667	34.6675	16.6667	50	34.6675	16.6667		50	34.6675	16.6667	24.0379	24.0379	34.6675	16.6667	16.6667									72.1137	450	104.002	216.341	104.002	312.007	72.1137	24.0379
104.002	104.002	50	50	24.0379	50	450	16.6667									104.002	16.6667	72.1137	24.0379	16.6667	104.002	34.6675	24.0379		16.6667	34.6675	24.0379	34.6675	34.6675	24.0379	16.6667	34.6675									34.6675	450	312.007	24.0379	450	104.002	16.6667	16.6667
16.6667	24.0379	216.341	24.0379	16.6667	24.0379	104.002	34.6675									72.1137	24.0379	16.6667	50	16.6667	16.6667	16.6667	50		16.6667	34.6675	16.6667	16.6667	16.6667	34.6675	24.0379	72.1137									24.0379	450	104.002	312.007	104.002	104.002	34.6675	72.1137
24.0379	16.6667	34.6675	72.1137	72.1137	16.6667	16.6667	16.6667									50	72.1137	24.0379	24.0379	72.1137	24.0379	72.1137	16.6667		24.0379	16.6667	34.6675	24.0379	50	24.0379	16.6667	16.6667									104.002	34.6675	16.6667	34.6675	150	216.341	104.002	312.007
16.6667	16.6667	16.6667	34.6675	16.6667	34.6675	34.6675	50									216.341	24.0379	24.0379	312.007	16.6667	16.6667	104.002	34.6675		16.6667	24.0379	34.6675	50	24.0379	50	50	24.0379									216.341	24.0379	34.6675	34.6675	50	24.0379	150	34.6675
[truncated: 24 more columns]

## Sheet: (b) Mitscherlich local conc, nM
150	16.6667	34.6675	34.6675	16.6667	24.0379	24.0379	24.0379									24.0379	34.6675	16.6667	34.6675	16.6667	16.6667	104.002	34.6675		104.002	16.6667	16.6667	16.6667	24.0379	24.0379	24.0379	50	34.6675	34.6675	16.6667	34.6675	24.0379	34.6675	24.0379	24.0379	16.6667	34.6675	16.6667	50	16.6667	34.6675	50	34.6675
72.1137	16.6667	34.6675	50	16.6667	72.1137	34.6675	72.1137									24.0379	72.1137	16.6667	450	24.0379	150	16.6667	24.0379		50	104.002	50	50	34.6675	150	216.341	24.0379	16.6667	34.6675	104.002	34.6675	50	24.0379	50	34.6675	16.6667	24.0379	24.0379	24.0379	24.0379	24.0379	34.6675	24.0379
150	16.6667	16.6667	34.6675	24.0379	24.0379	104.002	24.0379									150	24.0379	16.6667	16.6667	24.0379	34.6675	24.0379	34.6675		16.6667	24.0379	16.6667	16.6667	34.6675	34.6675	16.6667	16.6667	72.1137	34.6675	16.6667	16.6667	34.6675	16.6667	50	72.1137	150	16.6667	34.6675	72.1137	72.1137	24.0379	34.6675	50
24.0379	72.1137	16.6667	16.6667	34.6675	104.002	24.0379	16.6667									50	24.0379	24.0379	24.0379	16.6667	24.0379	24.0379	34.6675		50	34.6675	16.6667	24.0379	72.1137	16.6667	16.6667	16.6667	24.0379	34.6675	24.0379	50	34.6675	24.0379	16.6667	16.6667	16.6667	16.6667	24.0379	24.0379	72.1137	24.0379	34.6675	24.0379
50	50	104.002	24.0379	16.6667	16.6667	72.1137	72.1137									150	16.6667	16.6667	16.6667	312.007	24.0379	24.0379	150		24.0379	24.0379	24.0379	16.6667	24.0379	16.6667	16.6667	34.6675	24.0379	24.0379	72.1137	16.6667	24.0379	16.6667	16.6667	72.1137	16.6667	24.0379	104.002	34.6675	24.0379	16.6667	34.6675	34.6675
50	16.6667	34.6675	24.0379	24.0379	16.6667	16.6667	50									34.6675	16.6667	16.6667	24.0379	24.0379	34.6675	16.6667	24.0379		24.0379	150	24.0379	24.0379	24.0379	150	24.0379	24.0379	24.0379	24.0379	72.1137	34.6675	16.6667	24.0379	104.002	16.6667	24.0379	24.0379	16.6667	50	16.6667	24.0379	34.6675	150
50	16.6667	16.6667	16.6667	16.6667	24.0379	16.6667	50	24.0379	34.6675	24.0379	16.6667	150	34.6675	450	50	16.6667	312.007	24.0379	50	16.6667	16.6667	24.0379	16.6667		104.002	16.6667	72.1137	16.6667	16.6667	50	34.6675	72.1137	150	16.6667	50	34.6675	16.6667	16.6667	16.6667	312.007	24.0379	16.6667	34.6675	16.6667	24.0379	16.6667	16.6667	72.1137
50	24.0379	50	24.0379	16.6667	16.6667	50	24.0379	50	16.6667	16.6667	16.6667	16.6667	34.6675	16.6667	16.6667	24.0379	34.6675	104.002	24.0379	34.6675	34.6675	34.6675	104.002		50	72.1137	16.6667	104.002	34.6675	16.6667	34.6675	24.0379	24.0379	16.6667	16.6667	16.6667	216.341	72.1137	34.6675	16.6667	50	24.0379	16.6667	34.6675	16.6667	150	16.6667	50
50	16.6667	216.341	24.0379	24.0379	34.6675	72.1137	34.6675	16.6667	72.1137	16.6667	24.0379	216.341	16.6667	16.6667	16.6667	24.0379	34.6675	16.6667	16.6667	16.6667	72.1137	24.0379	34.6675		50	16.6667	24.0379	24.0379	34.6675	16.6667	104.002	16.6667									16.6667	16.6667	104.002	24.0379	24.0379	72.1137	34.6675	16.6667
16.6667	16.6667	24.0379	104.002	24.0379	16.6667	72.1137	24.0379	216.341	24.0379	312.007	16.6667	34.6675	16.6667	50	16.6667	16.6667	34.6675	50	50	72.1137	16.6667	50	16.6667		72.1137	16.6667	34.6675	16.6667	50	24.0379	16.6667	104.002									16.6667	104.002	34.6675	34.6675	34.6675	104.002	24.0379	24.0379
50	34.6675	16.6667	34.6675	16.6667	50	16.6667	16.6667	16.6667	16.6667	24.0379	24.0379	50	24.0379	34.6675	24.0379	24.0379	50	16.6667	16.6667	16.6667	16.6667	16.6667	16.6667		50	16.6667	72.1137	16.6667	72.1137	50	72.1137	16.6667									24.0379	216.341	50	34.6675	16.6667	34.6675	16.6667	50
72.1137	24.0379	16.6667	16.6667	16.6667	16.6667	16.6667	34.6675	16.6667	16.6667	16.6667	16.6667	16.6667	34.6675	16.6667	72.1137	24.0379	104.002	50	16.6667	72.1137	34.6675	16.6667	50		24.0379	72.1137	16.6667	16.6667	16.6667	16.6667	16.6667	24.0379									16.6667	16.6667	16.6667	34.6675	104.002	16.6667	50	24.0379
16.6667	16.6667	16.6667	50	16.6667	16.6667	72.1137	34.6675	24.0379	16.6667	24.0379	24.0379	16.6667	24.0379	50	24.0379	16.6667	16.6667	34.6675	16.6667	24.0379	216.341	24.0379	16.6667		150	34.6675	16.6667	16.6667	24.0379	34.6675	16.6667	50	34.6675	16.6667	312.007	16.6667	104.002	50	104.002	34.6675	34.6675	34.6675	16.6667	24.0379	24.0379	24.0379	16.6667	16.6667
34.6675	150	24.0379	34.6675	16.6667	34.6675	16.6667	24.0379	50	216.341	24.0379	34.6675	16.6667	34.6675	34.6675	16.6667	16.6667	16.6667	34.6675	24.0379	16.6667	72.1137	72.1137	150		72.1137	34.6675	16.6667	34.6675	16.6667	72.1137	24.0379	24.0379	16.6667	216.341	16.6667	16.6667	16.6667	24.0379	24.0379	216.341	16.6667	16.6667	34.6675	24.0379	16.6667	34.6675	24.0379	104.002
34.6675	16.6667	16.6667	24.0379	216.341	34.6675	16.6667	16.6667	24.0379	16.6667	16.6667	16.6667	24.0379	34.6675	24.0379	104.002	16.6667	24.0379	16.6667	50	16.6667	16.6667	34.6675	72.1137		16.6667	24.0379	16.6667	50	150	34.6675	34.6675	16.6667	24.0379	50	24.0379	50	24.0379	16.6667	16.6667	34.6675	16.6667	72.1137	16.6667	24.0379	16.6667	216.341	16.6667	16.6667
16.6667	72.1137	34.6675	16.6667	16.6667	50	34.6675	16.6667	50	16.6667	34.6675	16.6667	16.6667	72.1137	50	24.0379	34.6675	24.0379	34.6675	16.6667	24.0379	16.6667	34.6675	24.0379		50	150	16.6667	16.6667	34.6675	34.6675	16.6667	24.0379	50	50	24.0379	24.0379	50	34.6675	34.6675	16.6667	34.6675	16.6667	16.6667	50	34.6675	16.6667	104.002	16.6667
450	24.0379	34.6675	16.6667	34.6675	72.1137	16.6667	24.0379	34.6675	16.6667	450	24.0379	16.6667	16.6667	34.6675	216.341	24.0379	16.6667	216.341	16.6667	72.1137	24.0379	34.6675	16.6667		24.0379	50	50	16.6667	72.1137	312.007	16.6667	16.6667	34.6675	34.6675	16.6667	16.6667	34.6675	16.6667	24.0379	24.0379	34.6675	16.6667	24.0379	24.0379	34.6675	16.6667	24.0379	24.0379
50	104.002	34.6675	16.6667	24.0379	24.0379	34.6675	16.6667	34.6675	24.0379	150	150	34.6675	16.6667	150	50	24.0379	24.0379	16.6667	16.6667	450	16.6667	34.6675	16.6667		72.1137	50	24.0379	24.0379	16.6667	50	34.6675	24.0379	72.1137	16.6667	34.6675	24.0379	24.0379	24.0379	24.0379	150	24.0379	24.0379	24.0379	34.6675	24.0379	34.6675	72.1137	72.1137
16.6667	16.6667	16.6667	24.0379	50	50	16.6667	16.6667									216.341	34.6675	16.6667	72.1137	16.6667	16.6667	16.6667	104.002		24.0379	50	16.6667	16.6667	24.0379	24.0379	150	24.0379									104.002	24.0379	24.0379	50	34.6675	72.1137	34.6675	16.6667
72.1137	24.0379	104.002	16.6667	16.6667	16.6667	16.6667	312.007									16.6667	24.0379	72.1137	24.0379	16.6667	34.6675	72.1137	16.6667		34.6675	104.002	34.6675	34.6675	24.0379	16.6667	34.6675	34.6675									50	24.0379	24.0379	24.0379	16.6667	34.6675	24.0379	150
24.0379	24.0379	72.1137	16.6667	16.6667	16.6667	34.6675	104.002									24.0379	16.6667	34.6675	50	16.6667	24.0379	16.6667	72.1137		34.6675	24.0379	16.6667	24.0379	16.6667	16.6667	16.6667	104.002									34.6675	16.6667	72.1137	50	16.6667	16.6667	50	34.6675
50	104.002	24.0379	16.6667	72.1137	16.6667	24.0379	24.0379									24.0379	16.6667	16.6667	72.1137	24.0379	24.0379	16.6667	104.002		34.6675	34.6675	72.1137	34.6675	16.6667	16.6667	16.6667	216.341									24.0379	16.6667	34.6675	24.0379	24.0379	216.341	72.1137	24.0379
104.002	16.6667	16.6667	16.6667	24.0379	50	216.341	50									312.007	24.0379	16.6667	34.6675	24.0379	216.341	24.0379	16.6667		16.6667	16.6667	16.6667	104.002	72.1137	24.0379	16.6667	104.002									50	16.6667	16.6667	216.341	16.6667	34.6675	24.0379	72.1137
16.6667	72.1137	16.6667	24.0379	24.0379	216.341	34.6675	24.0379									72.1137	16.6667	216.341	24.0379	24.0379	24.0379	24.0379	16.6667		16.6667	16.6667	34.6675	150	16.6667	16.6667	150	104.002									72.1137	24.0379	24.0379	104.002	150	16.6667	34.6675	104.002
[truncated: 24 more columns]

## Sheet: (b) Hopfield local conc, nM
34.6675	34.6675	24.0379	24.0379	50	24.0379	16.6667	16.6667									34.6675	72.1137	16.6667	24.0379	104.002	16.6667	50	312.007		34.6675	16.6667	16.6667	16.6667	24.0379	24.0379	16.6667	216.341	450	16.6667	16.6667	24.0379	50	24.0379	50	34.6675	216.341	72.1137	72.1137	104.002	16.6667	72.1137	16.6667	312.007
50	50	216.341	34.6675	16.6667	312.007	16.6667	50									24.0379	16.6667	16.6667	16.6667	16.6667	34.6675	24.0379	24.0379		50	50	16.6667	72.1137	16.6667	50	24.0379	34.6675	34.6675	34.6675	16.6667	16.6667	16.6667	34.6675	16.6667	24.0379	450	34.6675	24.0379	34.6675	16.6667	34.6675	24.0379	16.6667
72.1137	16.6667	150	24.0379	34.6675	150	16.6667	24.0379									34.6675	216.341	34.6675	16.6667	34.6675	34.6675	24.0379	24.0379		104.002	34.6675	16.6667	16.6667	16.6667	34.6675	16.6667	104.002	16.6667	24.0379	450	24.0379	72.1137	72.1137	50	16.6667	50	24.0379	24.0379	216.341	24.0379	72.1137	16.6667	450
16.6667	216.341	16.6667	72.1137	16.6667	50	24.0379	72.1137									24.0379	50	24.0379	104.002	34.6675	16.6667	16.6667	72.1137		16.6667	24.0379	16.6667	16.6667	150	16.6667	50	50	24.0379	24.0379	24.0379	16.6667	50	50	16.6667	16.6667	24.0379	16.6667	50	34.6675	72.1137	72.1137	24.0379	34.6675
50	16.6667	50	34.6675	50	16.6667	72.1137	34.6675									34.6675	104.002	16.6667	16.6667	34.6675	150	24.0379	72.1137		16.6667	24.0379	16.6667	16.6667	16.6667	104.002	16.6667	24.0379	34.6675	34.6675	150	50	16.6667	16.6667	16.6667	16.6667	16.6667	34.6675	216.341	16.6667	50	34.6675	24.0379	72.1137
16.6667	72.1137	24.0379	16.6667	24.0379	16.6667	16.6667	16.6667									16.6667	50	50	24.0379	34.6675	24.0379	72.1137	24.0379		24.0379	16.6667	72.1137	24.0379	24.0379	34.6675	50	24.0379	24.0379	50	104.002	34.6675	16.6667	24.0379	34.6675	34.6675	16.6667	16.6667	72.1137	72.1137	72.1137	24.0379	24.0379	34.6675
24.0379	16.6667	50	16.6667	16.6667	24.0379	72.1137	16.6667	24.0379	16.6667	104.002	50	50	72.1137	72.1137	16.6667	34.6675	216.341	16.6667	16.6667	72.1137	24.0379	16.6667	24.0379		50	24.0379	16.6667	16.6667	50	16.6667	24.0379	150	72.1137	16.6667	150	16.6667	24.0379	104.002	24.0379	104.002	34.6675	16.6667	34.6675	16.6667	34.6675	104.002	16.6667	16.6667
50	34.6675	104.002	24.0379	72.1137	104.002	16.6667	50	16.6667	104.002	16.6667	16.6667	34.6675	16.6667	50	450	16.6667	50	34.6675	450	24.0379	24.0379	216.341	50		312.007	34.6675	16.6667	34.6675	16.6667	104.002	24.0379	34.6675	16.6667	34.6675	16.6667	24.0379	50	72.1137	16.6667	104.002	450	16.6667	104.002	24.0379	312.007	34.6675	34.6675	16.6667
72.1137	104.002	72.1137	24.0379	24.0379	24.0379	104.002	24.0379	16.6667	16.6667	50	16.6667	104.002	24.0379	104.002	16.6667	104.002	16.6667	150	312.007	450	150	16.6667	72.1137		24.0379	16.6667	16.6667	104.002	24.0379	34.6675	34.6675	24.0379									16.6667	16.6667	24.0379	24.0379	50	216.341	24.0379	16.6667
72.1137	24.0379	24.0379	50	34.6675	16.6667	216.341	24.0379	24.0379	104.002	104.002	16.6667	34.6675	72.1137	24.0379	34.6675	72.1137	50	450	216.341	150	450	16.6667	24.0379		104.002	50	24.0379	34.6675	450	16.6667	16.6667	16.6667									150	72.1137	16.6667	16.6667	16.6667	50	16.6667	24.0379
24.0379	24.0379	34.6675	24.0379	50	16.6667	16.6667	16.6667	72.1137	24.0379	34.6675	24.0379	72.1137	24.0379	24.0379	24.0379	16.6667	216.341	450	72.1137	104.002	450	50	16.6667		104.002	104.002	16.6667	24.0379	312.007	16.6667	50	104.002									34.6675	34.6675	16.6667	24.0379	16.6667	16.6667	16.6667	24.0379
312.007	72.1137	72.1137	34.6675	24.0379	50	24.0379	312.007	24.0379	50	16.6667	16.6667	216.341	16.6667	24.0379	16.6667	16.6667	72.1137	450	450	150	312.007	72.1137	16.6667		24.0379	16.6667	312.007	24.0379	16.6667	16.6667	24.0379	24.0379									34.6675	24.0379	16.6667	72.1137	72.1137	16.6667	16.6667	16.6667
50	104.002	16.6667	34.6675	34.6675	34.6675	72.1137	24.0379	24.0379	16.6667	24.0379	24.0379	16.6667	72.1137	216.341	16.6667	50	104.002	24.0379	16.6667	24.0379	34.6675	24.0379	16.6667		50	16.6667	24.0379	16.6667	24.0379	24.0379	72.1137	16.6667	24.0379	50	104.002	34.6675	50	16.6667	34.6675	16.6667	16.6667	24.0379	16.6667	24.0379	34.6675	34.6675	34.6675	72.1137
24.0379	34.6675	24.0379	104.002	16.6667	16.6667	24.0379	50	104.002	34.6675	24.0379	34.6675	16.6667	16.6667	50	34.6675	16.6667	16.6667	24.0379	50	16.6667	16.6667	216.341	50		312.007	50	16.6667	24.0379	16.6667	16.6667	34.6675	24.0379	16.6667	34.6675	16.6667	72.1137	16.6667	24.0379	16.6667	50	216.341	16.6667	24.0379	24.0379	16.6667	150	24.0379	34.6675
24.0379	16.6667	312.007	34.6675	24.0379	24.0379	16.6667	16.6667	50	34.6675	34.6675	24.0379	34.6675	16.6667	24.0379	16.6667	104.002	16.6667	16.6667	150	450	72.1137	16.6667	216.341		72.1137	150	16.6667	104.002	34.6675	24.0379	24.0379	72.1137	24.0379	16.6667	16.6667	16.6667	16.6667	72.1137	16.6667	24.0379	16.6667	16.6667	16.6667	24.0379	16.6667	24.0379	450	16.6667
150	50	24.0379	34.6675	50	150	24.0379	34.6675	16.6667	34.6675	16.6667	34.6675	24.0379	34.6675	16.6667	24.0379	104.002	24.0379	104.002	34.6675	72.1137	16.6667	216.341	24.0379		150	34.6675	34.6675	16.6667	24.0379	24.0379	16.6667	16.6667	16.6667	24.0379	16.6667	24.0379	24.0379	34.6675	34.6675	16.6667	16.6667	312.007	16.6667	150	216.341	104.002	24.0379	34.6675
150	24.0379	24.0379	16.6667	24.0379	16.6667	16.6667	72.1137	34.6675	34.6675	34.6675	50	16.6667	16.6667	34.6675	24.0379	34.6675	16.6667	34.6675	16.6667	16.6667	16.6667	150	24.0379		34.6675	34.6675	50	16.6667	216.341	216.341	72.1137	72.1137	16.6667	216.341	16.6667	50	24.0379	16.6667	34.6675	24.0379	24.0379	72.1137	24.0379	16.6667	24.0379	50	16.6667	24.0379
16.6667	50	16.6667	24.0379	34.6675	24.0379	16.6667	16.6667	16.6667	34.6675	16.6667	24.0379	50	24.0379	24.0379	104.002	24.0379	16.6667	50	16.6667	50	16.6667	24.0379	24.0379		50	50	216.341	24.0379	16.6667	16.6667	16.6667	24.0379	150	34.6675	50	24.0379	24.0379	24.0379	16.6667	34.6675	16.6667	16.6667	16.6667	34.6675	72.1137	34.6675	216.341	50
34.6675	16.6667	312.007	16.6667	16.6667	104.002	24.0379	72.1137									150	24.0379	50	16.6667	34.6675	104.002	34.6675	24.0379		24.0379	104.002	72.1137	24.0379	24.0379	16.6667	34.6675	24.0379									34.6675	24.0379	72.1137	216.341	72.1137	150	24.0379	16.6667
150	24.0379	72.1137	450	16.6667	34.6675	16.6667	312.007									34.6675	24.0379	104.002	24.0379	16.6667	72.1137	16.6667	16.6667		16.6667	34.6675	24.0379	72.1137	24.0379	34.6675	104.002	150									24.0379	24.0379	16.6667	50	16.6667	104.002	24.0379	24.0379
16.6667	16.6667	50	50	16.6667	34.6675	24.0379	34.6675									34.6675	16.6667	24.0379	16.6667	16.6667	16.6667	24.0379	16.6667		24.0379	50	34.6675	34.6675	34.6675	50	24.0379	16.6667									34.6675	16.6667	104.002	150	16.6667	16.6667	216.341	24.0379
150	24.0379	34.6675	150	216.341	216.341	16.6667	16.6667									24.0379	16.6667	50	24.0379	16.6667	24.0379	16.6667	50		24.0379	34.6675	16.6667	72.1137	24.0379	34.6675	16.6667	24.0379									16.6667	34.6675	216.341	16.6667	16.6667	50	16.6667	34.6675
50	312.007	24.0379	16.6667	24.0379	16.6667	50	24.0379									34.6675	50	16.6667	16.6667	24.0379	24.0379	24.0379	150		16.6667	24.0379	34.6675	24.0379	50	150	16.6667	24.0379									150	16.6667	16.6667	24.0379	16.6667	104.002	50	216.341
34.6675	72.1137	16.6667	104.002	16.6667	72.1137	24.0379	34.6675									150	34.6675	50	24.0379	16.6667	24.0379	24.0379	34.6675		34.6675	16.6667	24.0379	24.0379	16.6667	50	24.0379	50									150	24.0379	72.1137	16.6667	16.6667	34.6675	104.002	24.0379
[truncated: 24 more columns]

## Sheet: (b) Abbott local conc, nM
24.0379	34.6675	24.0379	216.341	50	150	24.0379	16.6667									24.0379	450	104.002	16.6667	16.6667	24.0379	34.6675	216.341		16.6667	16.6667	104.002	24.0379	34.6675	150	24.0379	216.341	312.007	16.6667	24.0379	216.341	34.6675	16.6667	34.6675	16.6667	50	450	16.6667	216.341	16.6667	450	34.6675	216.341
50	24.0379	104.002	24.0379	16.6667	150	216.341	16.6667									72.1137	34.6675	24.0379	24.0379	16.6667	16.6667	16.6667	16.6667		312.007	34.6675	16.6667	16.6667	72.1137	34.6675	16.6667	24.0379	34.6675	24.0379	24.0379	16.6667	16.6667	24.0379	150	72.1137	16.6667	104.002	24.0379	24.0379	16.6667	24.0379	24.0379	16.6667
50	16.6667	16.6667	72.1137	72.1137	16.6667	16.6667	104.002									34.6675	50	16.6667	16.6667	150	24.0379	72.1137	34.6675		34.6675	16.6667	34.6675	16.6667	150	24.0379	24.0379	16.6667	16.6667	34.6675	16.6667	16.6667	216.341	50	34.6675	16.6667	24.0379	24.0379	72.1137	150	150	34.6675	16.6667	104.002
16.6667	450	16.6667	72.1137	34.6675	34.6675	16.6667	50									50	72.1137	216.341	34.6675	16.6667	216.341	72.1137	50		16.6667	24.0379	16.6667	72.1137	312.007	24.0379	24.0379	34.6675	16.6667	72.1137	72.1137	16.6667	16.6667	104.002	150	16.6667	16.6667	24.0379	72.1137	50	50	34.6675	24.0379	50
16.6667	16.6667	34.6675	16.6667	50	216.341	34.6675	150									24.0379	50	34.6675	16.6667	24.0379	24.0379	16.6667	50		24.0379	34.6675	216.341	16.6667	24.0379	50	16.6667	72.1137	72.1137	104.002	150	34.6675	16.6667	34.6675	16.6667	24.0379	16.6667	24.0379	450	216.341	72.1137	16.6667	72.1137	16.6667
16.6667	72.1137	24.0379	16.6667	24.0379	104.002	34.6675	24.0379									34.6675	24.0379	24.0379	104.002	16.6667	104.002	50	24.0379		72.1137	34.6675	16.6667	72.1137	104.002	24.0379	312.007	24.0379	104.002	34.6675	150	50	16.6667	150	450	34.6675	72.1137	24.0379	72.1137	450	50	72.1137	24.0379	24.0379
24.0379	24.0379	50	16.6667	312.007	24.0379	24.0379	16.6667	24.0379	24.0379	72.1137	16.6667	24.0379	450	50	24.0379	34.6675	72.1137	24.0379	150	34.6675	16.6667	24.0379	24.0379		24.0379	16.6667	16.6667	24.0379	50	34.6675	72.1137	150	50	16.6667	150	24.0379	24.0379	16.6667	24.0379	50	72.1137	16.6667	24.0379	16.6667	34.6675	72.1137	72.1137	50
312.007	24.0379	24.0379	104.002	50	72.1137	16.6667	16.6667	16.6667	16.6667	24.0379	24.0379	50	16.6667	34.6675	16.6667	216.341	16.6667	450	50	24.0379	24.0379	104.002	24.0379		312.007	34.6675	16.6667	34.6675	24.0379	72.1137	24.0379	150	16.6667	16.6667	24.0379	16.6667	34.6675	72.1137	216.341	72.1137	104.002	34.6675	50	24.0379	16.6667	34.6675	50	24.0379
34.6675	24.0379	24.0379	24.0379	104.002	24.0379	312.007	24.0379	24.0379	24.0379	24.0379	216.341	72.1137	16.6667	16.6667	16.6667	50	24.0379	50	16.6667	16.6667	150	16.6667	16.6667		16.6667	24.0379	24.0379	16.6667	24.0379	24.0379	16.6667	24.0379									216.341	24.0379	24.0379	50	24.0379	216.341	24.0379	16.6667
16.6667	24.0379	50	34.6675	24.0379	16.6667	216.341	104.002	34.6675	34.6675	50	16.6667	24.0379	50	24.0379	16.6667	16.6667	16.6667	104.002	16.6667	312.007	16.6667	16.6667	16.6667		16.6667	34.6675	24.0379	16.6667	16.6667	216.341	50	34.6675									16.6667	24.0379	24.0379	24.0379	24.0379	34.6675	34.6675	72.1137
16.6667	24.0379	50	34.6675	72.1137	16.6667	16.6667	16.6667	50	16.6667	24.0379	104.002	16.6667	34.6675	24.0379	104.002	34.6675	150	16.6667	16.6667	50	16.6667	50	16.6667		450	24.0379	34.6675	16.6667	150	16.6667	34.6675	50									72.1137	24.0379	16.6667	24.0379	24.0379	16.6667	16.6667	16.6667
16.6667	50	50	50	16.6667	50	16.6667	216.341	16.6667	34.6675	16.6667	16.6667	16.6667	150	16.6667	24.0379	216.341	24.0379	16.6667	16.6667	216.341	216.341	50	34.6675		312.007	16.6667	16.6667	16.6667	16.6667	104.002	16.6667	24.0379									16.6667	16.6667	16.6667	24.0379	24.0379	16.6667	16.6667	72.1137
24.0379	50	150	16.6667	24.0379	16.6667	216.341	34.6675	104.002	50	16.6667	24.0379	16.6667	72.1137	150	34.6675	24.0379	72.1137	34.6675	34.6675	24.0379	24.0379	24.0379	16.6667		50	16.6667	16.6667	16.6667	24.0379	24.0379	34.6675	16.6667	24.0379	16.6667	72.1137	34.6675	16.6667	24.0379	34.6675	24.0379	16.6667	24.0379	24.0379	216.341	24.0379	16.6667	16.6667	16.6667
72.1137	24.0379	24.0379	16.6667	16.6667	16.6667	16.6667	16.6667	50	34.6675	72.1137	16.6667	16.6667	16.6667	16.6667	34.6675	16.6667	16.6667	24.0379	104.002	16.6667	24.0379	150	50		16.6667	24.0379	16.6667	104.002	16.6667	16.6667	72.1137	150	16.6667	34.6675	24.0379	34.6675	16.6667	72.1137	24.0379	50	16.6667	16.6667	50	16.6667	34.6675	50	72.1137	34.6675
24.0379	34.6675	50	72.1137	50	24.0379	24.0379	24.0379	72.1137	24.0379	24.0379	16.6667	50	72.1137	24.0379	24.0379	16.6667	16.6667	16.6667	104.002	16.6667	72.1137	24.0379	104.002		72.1137	16.6667	16.6667	50	34.6675	34.6675	104.002	50	24.0379	16.6667	34.6675	16.6667	24.0379	16.6667	24.0379	24.0379	16.6667	24.0379	16.6667	24.0379	24.0379	34.6675	16.6667	16.6667
16.6667	34.6675	24.0379	50	16.6667	150	50	34.6675	16.6667	16.6667	24.0379	16.6667	16.6667	16.6667	16.6667	24.0379	50	150	34.6675	50	34.6675	16.6667	450	34.6675		104.002	34.6675	16.6667	16.6667	312.007	72.1137	16.6667	150	16.6667	34.6675	216.341	104.002	24.0379	24.0379	24.0379	104.002	16.6667	34.6675	16.6667	72.1137	104.002	50	312.007	50
72.1137	34.6675	104.002	16.6667	24.0379	24.0379	24.0379	16.6667	34.6675	34.6675	24.0379	312.007	24.0379	24.0379	24.0379	16.6667	16.6667	16.6667	16.6667	450	24.0379	24.0379	104.002	24.0379		16.6667	16.6667	24.0379	24.0379	216.341	72.1137	50	50	104.002	104.002	16.6667	16.6667	104.002	34.6675	24.0379	24.0379	72.1137	16.6667	34.6675	150	24.0379	16.6667	16.6667	104.002
16.6667	34.6675	16.6667	16.6667	104.002	104.002	24.0379	16.6667	216.341	150	34.6675	34.6675	34.6675	34.6675	34.6675	312.007	72.1137	24.0379	16.6667	16.6667	50	16.6667	24.0379	16.6667		50	24.0379	50	150	16.6667	16.6667	34.6675	104.002	312.007	16.6667	34.6675	34.6675	24.0379	72.1137	16.6667	50	150	16.6667	24.0379	34.6675	72.1137	50	150	24.0379
34.6675	16.6667	16.6667	24.0379	16.6667	16.6667	16.6667	16.6667									50	72.1137	16.6667	16.6667	16.6667	16.6667	34.6675	16.6667		104.002	16.6667	72.1137	16.6667	34.6675	16.6667	34.6675	104.002									24.0379	34.6675	312.007	150	450	216.341	24.0379	16.6667
150	150	24.0379	16.6667	24.0379	16.6667	16.6667	50									16.6667	16.6667	150	104.002	16.6667	450	24.0379	16.6667		34.6675	34.6675	72.1137	216.341	72.1137	34.6675	34.6675	104.002									50	24.0379	216.341	216.341	450	312.007	24.0379	24.0379
150	24.0379	16.6667	24.0379	16.6667	16.6667	72.1137	50									72.1137	34.6675	24.0379	24.0379	16.6667	150	50	50		24.0379	312.007	34.6675	16.6667	16.6667	16.6667	24.0379	34.6675									34.6675	24.0379	450	104.002	450	216.341	104.002	34.6675
104.002	16.6667	16.6667	72.1137	150	16.6667	150	24.0379									312.007	16.6667	16.6667	24.0379	16.6667	50	16.6667	34.6675		72.1137	16.6667	16.6667	312.007	16.6667	24.0379	34.6675	34.6675									16.6667	50	450	216.341	216.341	50	24.0379	34.6675
16.6667	16.6667	16.6667	150	312.007	16.6667	34.6675	16.6667									24.0379	312.007	24.0379	16.6667	312.007	34.6675	24.0379	16.6667		24.0379	16.6667	50	34.6675	16.6667	24.0379	16.6667	16.6667									150	16.6667	24.0379	34.6675	150	50	104.002	104.002
16.6667	72.1137	24.0379	34.6675	16.6667	34.6675	24.0379	50									450	50	34.6675	16.6667	16.6667	72.1137	24.0379	16.6667		16.6667	24.0379	24.0379	34.6675	24.0379	24.0379	34.6675	34.6675									450	34.6675	34.6675	16.6667	34.6675	50	104.002	24.0379
[truncated: 24 more columns]

## Sheet: (b) Moser local conc, nM
72.1137	24.0379	16.6667	24.0379	50	16.6667	50	24.0379									34.6675	16.6667	16.6667	34.6675	50	24.0379	50	450		34.6675	72.1137	16.6667	24.0379	72.1137	16.6667	72.1137	16.6667	24.0379	34.6675	34.6675	24.0379	72.1137	34.6675	24.0379	50	24.0379	16.6667	24.0379	312.007	72.1137	16.6667	50	450
16.6667	24.0379	24.0379	24.0379	24.0379	312.007	16.6667	24.0379									16.6667	450	16.6667	72.1137	150	24.0379	50	34.6675		16.6667	34.6675	312.007	24.0379	16.6667	50	24.0379	34.6675	50	16.6667	24.0379	150	24.0379	16.6667	16.6667	104.002	50	16.6667	16.6667	16.6667	16.6667	50	16.6667	34.6675
72.1137	16.6667	34.6675	16.6667	24.0379	34.6675	24.0379	104.002									34.6675	16.6667	104.002	50	16.6667	16.6667	16.6667	16.6667		34.6675	24.0379	24.0379	16.6667	16.6667	16.6667	50	50	104.002	16.6667	34.6675	34.6675	16.6667	24.0379	34.6675	312.007	24.0379	24.0379	16.6667	16.6667	16.6667	16.6667	216.341	150
24.0379	16.6667	16.6667	50	16.6667	24.0379	24.0379	50									216.341	16.6667	16.6667	16.6667	34.6675	24.0379	16.6667	34.6675		24.0379	16.6667	16.6667	50	16.6667	16.6667	72.1137	34.6675	24.0379	216.341	24.0379	34.6675	16.6667	16.6667	16.6667	16.6667	16.6667	50	16.6667	16.6667	16.6667	16.6667	16.6667	50
34.6675	50	34.6675	16.6667	50	16.6667	50	16.6667									24.0379	50	16.6667	16.6667	24.0379	24.0379	34.6675	104.002		50	16.6667	24.0379	24.0379	16.6667	50	16.6667	16.6667	16.6667	16.6667	16.6667	72.1137	34.6675	16.6667	24.0379	24.0379	16.6667	72.1137	16.6667	16.6667	16.6667	16.6667	150	16.6667
24.0379	34.6675	16.6667	34.6675	16.6667	16.6667	16.6667	216.341									24.0379	104.002	72.1137	16.6667	16.6667	24.0379	16.6667	24.0379		16.6667	34.6675	16.6667	16.6667	104.002	34.6675	16.6667	16.6667	16.6667	104.002	16.6667	16.6667	16.6667	150	16.6667	50	16.6667	34.6675	16.6667	16.6667	16.6667	16.6667	16.6667	50
50	34.6675	50	50	16.6667	16.6667	50	150	24.0379	16.6667	50	34.6675	50	16.6667	34.6675	16.6667	34.6675	72.1137	34.6675	16.6667	50	24.0379	24.0379	24.0379		34.6675	50	24.0379	16.6667	16.6667	34.6675	450	16.6667	50	16.6667	216.341	16.6667	24.0379	50	24.0379	24.0379	24.0379	50	34.6675	50	104.002	72.1137	16.6667	24.0379
16.6667	24.0379	24.0379	24.0379	16.6667	50	24.0379	24.0379	24.0379	34.6675	16.6667	34.6675	16.6667	150	72.1137	104.002	24.0379	16.6667	16.6667	50	16.6667	16.6667	150	34.6675		312.007	34.6675	50	50	16.6667	16.6667	16.6667	24.0379	24.0379	34.6675	16.6667	24.0379	24.0379	16.6667	24.0379	50	450	16.6667	24.0379	34.6675	34.6675	34.6675	16.6667	24.0379
104.002	16.6667	24.0379	16.6667	16.6667	16.6667	34.6675	16.6667	16.6667	34.6675	50	16.6667	72.1137	16.6667	16.6667	16.6667	50	16.6667	24.0379	16.6667	34.6675	16.6667	16.6667	16.6667		24.0379	24.0379	16.6667	24.0379	16.6667	16.6667	34.6675	24.0379									16.6667	72.1137	34.6675	16.6667	72.1137	24.0379	16.6667	16.6667
24.0379	24.0379	16.6667	24.0379	72.1137	16.6667	24.0379	16.6667	34.6675	16.6667	24.0379	34.6675	16.6667	24.0379	34.6675	16.6667	24.0379	16.6667	450	16.6667	16.6667	34.6675	150	34.6675		24.0379	34.6675	16.6667	50	24.0379	16.6667	16.6667	72.1137									34.6675	34.6675	16.6667	16.6667	16.6667	34.6675	16.6667	150
24.0379	16.6667	50	24.0379	34.6675	150	16.6667	24.0379	24.0379	24.0379	24.0379	16.6667	34.6675	16.6667	16.6667	104.002	16.6667	24.0379	24.0379	24.0379	24.0379	50	24.0379	24.0379		16.6667	16.6667	50	24.0379	312.007	24.0379	34.6675	34.6675									16.6667	34.6675	16.6667	16.6667	34.6675	450	16.6667	16.6667
16.6667	72.1137	24.0379	50	24.0379	24.0379	16.6667	216.341	16.6667	50	16.6667	16.6667	34.6675	16.6667	50	16.6667	16.6667	34.6675	24.0379	72.1137	16.6667	150	16.6667	24.0379		16.6667	24.0379	50	24.0379	24.0379	16.6667	34.6675	24.0379									34.6675	104.002	24.0379	34.6675	34.6675	24.0379	16.6667	16.6667
104.002	24.0379	16.6667	16.6667	24.0379	34.6675	16.6667	16.6667	34.6675	16.6667	34.6675	16.6667	16.6667	16.6667	104.002	16.6667	24.0379	72.1137	16.6667	16.6667	24.0379	34.6675	16.6667	16.6667		24.0379	312.007	34.6675	16.6667	16.6667	16.6667	50	150	16.6667	34.6675	72.1137	24.0379	34.6675	16.6667	50	16.6667	216.341	16.6667	24.0379	16.6667	24.0379	16.6667	34.6675	50
24.0379	34.6675	24.0379	24.0379	24.0379	24.0379	34.6675	24.0379	16.6667	24.0379	16.6667	24.0379	50	34.6675	16.6667	34.6675	72.1137	16.6667	16.6667	24.0379	16.6667	24.0379	24.0379	104.002		16.6667	72.1137	16.6667	24.0379	16.6667	16.6667	16.6667	24.0379	16.6667	24.0379	24.0379	24.0379	16.6667	16.6667	16.6667	72.1137	34.6675	16.6667	16.6667	34.6675	16.6667	16.6667	24.0379	72.1137
16.6667	16.6667	72.1137	16.6667	24.0379	16.6667	16.6667	16.6667	16.6667	16.6667	50	34.6675	24.0379	16.6667	34.6675	24.0379	24.0379	16.6667	16.6667	34.6675	34.6675	16.6667	34.6675	24.0379		50	34.6675	16.6667	16.6667	34.6675	24.0379	24.0379	16.6667	16.6667	150	24.0379	50	50	24.0379	34.6675	16.6667	24.0379	34.6675	16.6667	16.6667	34.6675	34.6675	34.6675	16.6667
34.6675	34.6675	16.6667	34.6675	24.0379	24.0379	16.6667	104.002	450	24.0379	16.6667	24.0379	34.6675	24.0379	16.6667	72.1137	50	16.6667	24.0379	24.0379	16.6667	24.0379	24.0379	50		24.0379	104.002	34.6675	16.6667	16.6667	150	72.1137	16.6667	16.6667	16.6667	16.6667	16.6667	34.6675	34.6675	16.6667	16.6667	24.0379	16.6667	16.6667	312.007	24.0379	24.0379	16.6667	50
72.1137	16.6667	16.6667	16.6667	16.6667	24.0379	72.1137	16.6667	24.0379	50	50	16.6667	50	24.0379	34.6675	24.0379	24.0379	16.6667	34.6675	16.6667	16.6667	16.6667	104.002	24.0379		34.6675	16.6667	24.0379	16.6667	16.6667	72.1137	16.6667	16.6667	16.6667	150	24.0379	34.6675	16.6667	24.0379	16.6667	16.6667	104.002	24.0379	50	16.6667	34.6675	24.0379	24.0379	216.341
16.6667	34.6675	450	16.6667	16.6667	16.6667	16.6667	50	24.0379	16.6667	24.0379	24.0379	16.6667	24.0379	34.6675	150	24.0379	16.6667	24.0379	16.6667	50	34.6675	16.6667	16.6667		16.6667	24.0379	16.6667	16.6667	16.6667	16.6667	16.6667	16.6667	16.6667	34.6675	16.6667	50	16.6667	16.6667	16.6667	50	16.6667	16.6667	16.6667	24.0379	16.6667	16.6667	24.0379	34.6675
24.0379	50	16.6667	16.6667	16.6667	450	34.6675	50									72.1137	16.6667	34.6675	312.007	24.0379	50	34.6675	24.0379		16.6667	450	50	16.6667	50	104.002	34.6675	104.002									34.6675	16.6667	16.6667	24.0379	16.6667	16.6667	16.6667	24.0379
16.6667	24.0379	34.6675	34.6675	16.6667	16.6667	16.6667	34.6675									34.6675	34.6675	16.6667	16.6667	16.6667	16.6667	24.0379	50		24.0379	34.6675	16.6667	16.6667	16.6667	104.002	24.0379	34.6675									216.341	16.6667	16.6667	16.6667	16.6667	312.007	24.0379	24.0379
16.6667	16.6667	24.0379	34.6675	16.6667	16.6667	24.0379	16.6667									16.6667	24.0379	16.6667	34.6675	16.6667	16.6667	34.6675	24.0379		16.6667	16.6667	34.6675	16.6667	16.6667	24.0379	16.6667	24.0379									34.6675	16.6667	16.6667	34.6675	16.6667	16.6667	104.002	16.6667
24.0379	34.6675	24.0379	50	16.6667	16.6667	16.6667	50									16.6667	24.0379	34.6675	24.0379	104.002	16.6667	16.6667	50		24.0379	24.0379	24.0379	16.6667	24.0379	24.0379	16.6667	34.6675									24.0379	50	24.0379	50	24.0379	24.0379	24.0379	72.1137
34.6675	50	24.0379	16.6667	24.0379	150	24.0379	16.6667									24.0379	16.6667	24.0379	312.007	16.6667	34.6675	34.6675	16.6667		104.002	16.6667	50	24.0379	34.6675	24.0379	34.6675	24.0379									216.341	24.0379	50	34.6675	16.6667	50	24.0379	24.0379
50	16.6667	16.6667	50	16.6667	24.0379	72.1137	72.1137									16.6667	34.6675	24.0379	24.0379	24.0379	16.6667	16.6667	104.002		50	34.6675	72.1137	24.0379	72.1137	34.6675	34.6675	104.002									16.6667	50	72.1137	24.0379	24.0379	34.6675	312.007	72.1137
[truncated: 24 more columns]

## Sheet: (b) Horse local conc, nM
104.002	24.0379	16.6667	16.6667	34.6675	50	16.6667	72.1137									150	50	34.6675	50	16.6667	16.6667	72.1137	16.6667		50	72.1137	34.6675	16.6667	50	50	50	24.0379	16.6667	24.0379	34.6675	16.6667	16.6667	50	104.002	72.1137	104.002	50	34.6675	16.6667	34.6675	50	50	16.6667
50	104.002	16.6667	216.341	16.6667	16.6667	16.6667	216.341									16.6667	16.6667	34.6675	24.0379	24.0379	24.0379	34.6675	150		50	50	16.6667	24.0379	34.6675	50	24.0379	34.6675	450	16.6667	150	24.0379	16.6667	24.0379	34.6675	16.6667	16.6667	24.0379	16.6667	16.6667	24.0379	16.6667	24.0379	72.1137
150	50	34.6675	24.0379	24.0379	16.6667	50	34.6675									450	16.6667	16.6667	50	72.1137	16.6667	16.6667	50		104.002	16.6667	34.6675	34.6675	34.6675	16.6667	34.6675	16.6667	16.6667	16.6667	16.6667	34.6675	50	24.0379	34.6675	16.6667	216.341	16.6667	50	24.0379	34.6675	150	16.6667	16.6667
16.6667	24.0379	24.0379	50	24.0379	50	16.6667	34.6675									16.6667	312.007	16.6667	24.0379	34.6675	34.6675	34.6675	104.002		34.6675	16.6667	24.0379	16.6667	34.6675	16.6667	150	16.6667	16.6667	16.6667	24.0379	16.6667	34.6675	16.6667	34.6675	16.6667	16.6667	24.0379	34.6675	34.6675	24.0379	24.0379	24.0379	24.0379
312.007	24.0379	72.1137	16.6667	24.0379	34.6675	150	50									312.007	104.002	50	24.0379	450	24.0379	72.1137	104.002		72.1137	50	16.6667	16.6667	16.6667	104.002	16.6667	24.0379	16.6667	34.6675	24.0379	24.0379	24.0379	50	16.6667	16.6667	16.6667	150	34.6675	16.6667	312.007	24.0379	16.6667	16.6667
34.6675	50	16.6667	34.6675	24.0379	24.0379	16.6667	16.6667									16.6667	72.1137	150	72.1137	16.6667	50	50	72.1137		16.6667	16.6667	312.007	16.6667	24.0379	16.6667	50	16.6667	72.1137	72.1137	34.6675	16.6667	16.6667	16.6667	50	16.6667	34.6675	16.6667	34.6675	34.6675	34.6675	24.0379	16.6667	24.0379
72.1137	24.0379	34.6675	16.6667	16.6667	16.6667	104.002	16.6667	50	24.0379	104.002	24.0379	50	50	450	34.6675	312.007	50	72.1137	34.6675	104.002	24.0379	24.0379	24.0379		34.6675	34.6675	24.0379	16.6667	50	16.6667	16.6667	24.0379	104.002	24.0379	16.6667	24.0379	104.002	16.6667	50	216.341	16.6667	24.0379	150	50	16.6667	34.6675	72.1137	16.6667
50	16.6667	16.6667	50	34.6675	104.002	16.6667	104.002	24.0379	16.6667	16.6667	16.6667	50	34.6675	24.0379	16.6667	24.0379	216.341	50	72.1137	24.0379	24.0379	16.6667	150		16.6667	34.6675	24.0379	104.002	16.6667	34.6675	24.0379	24.0379	16.6667	34.6675	50	24.0379	34.6675	50	16.6667	24.0379	16.6667	16.6667	34.6675	24.0379	16.6667	34.6675	50	16.6667
72.1137	50	150	16.6667	50	34.6675	16.6667	24.0379	16.6667	16.6667	312.007	24.0379	216.341	16.6667	150	16.6667	150	24.0379	50	24.0379	34.6675	24.0379	34.6675	16.6667		150	16.6667	16.6667	16.6667	24.0379	104.002	24.0379	34.6675									34.6675	72.1137	24.0379	16.6667	72.1137	16.6667	24.0379	34.6675
24.0379	50	16.6667	216.341	150	16.6667	16.6667	34.6675	34.6675	216.341	216.341	34.6675	24.0379	34.6675	450	16.6667	16.6667	216.341	16.6667	34.6675	34.6675	24.0379	24.0379	216.341		16.6667	72.1137	24.0379	50	16.6667	34.6675	16.6667	72.1137									16.6667	216.341	50	16.6667	24.0379	24.0379	16.6667	34.6675
150	16.6667	24.0379	16.6667	50	34.6675	24.0379	24.0379	312.007	34.6675	50	72.1137	72.1137	16.6667	16.6667	24.0379	16.6667	24.0379	16.6667	16.6667	50	16.6667	34.6675	24.0379		50	50	16.6667	24.0379	16.6667	24.0379	34.6675	150									24.0379	24.0379	24.0379	34.6675	16.6667	24.0379	50	34.6675
16.6667	72.1137	24.0379	24.0379	24.0379	34.6675	16.6667	16.6667	24.0379	216.341	24.0379	16.6667	16.6667	34.6675	50	34.6675	16.6667	216.341	16.6667	16.6667	24.0379	16.6667	34.6675	16.6667		50	34.6675	16.6667	16.6667	24.0379	24.0379	34.6675	72.1137									16.6667	34.6675	16.6667	216.341	150	16.6667	24.0379	72.1137
450	34.6675	24.0379	34.6675	104.002	16.6667	34.6675	16.6667	24.0379	16.6667	34.6675	16.6667	16.6667	150	16.6667	16.6667	150	34.6675	16.6667	16.6667	16.6667	24.0379	24.0379	34.6675		72.1137	16.6667	34.6675	24.0379	24.0379	16.6667	104.002	34.6675	16.6667	24.0379	150	24.0379	34.6675	34.6675	24.0379	24.0379	24.0379	24.0379	16.6667	16.6667	16.6667	16.6667	24.0379	16.6667
16.6667	312.007	16.6667	34.6675	34.6675	24.0379	34.6675	312.007	450	450	34.6675	24.0379	24.0379	24.0379	34.6675	104.002	34.6675	16.6667	24.0379	24.0379	24.0379	50	24.0379	150		16.6667	72.1137	50	16.6667	24.0379	24.0379	50	16.6667	34.6675	450	16.6667	216.341	16.6667	16.6667	34.6675	72.1137	16.6667	16.6667	16.6667	50	16.6667	50	16.6667	104.002
24.0379	50	150	50	50	24.0379	34.6675	216.341	312.007	104.002	450	34.6675	16.6667	34.6675	34.6675	150	24.0379	24.0379	16.6667	16.6667	16.6667	34.6675	104.002	24.0379		24.0379	16.6667	16.6667	450	24.0379	16.6667	16.6667	34.6675	16.6667	16.6667	16.6667	24.0379	24.0379	16.6667	16.6667	16.6667	72.1137	16.6667	16.6667	16.6667	16.6667	16.6667	24.0379	34.6675
16.6667	34.6675	16.6667	34.6675	16.6667	16.6667	16.6667	312.007	34.6675	50	50	34.6675	34.6675	34.6675	34.6675	24.0379	72.1137	50	104.002	24.0379	150	34.6675	16.6667	72.1137		24.0379	16.6667	16.6667	16.6667	16.6667	16.6667	34.6675	24.0379	34.6675	16.6667	16.6667	24.0379	450	50	24.0379	24.0379	24.0379	72.1137	16.6667	16.6667	16.6667	50	50	34.6675
312.007	50	34.6675	34.6675	34.6675	16.6667	104.002	312.007	450	450	312.007	104.002	34.6675	16.6667	150	24.0379	150	16.6667	34.6675	16.6667	24.0379	16.6667	16.6667	34.6675		216.341	34.6675	24.0379	16.6667	24.0379	50	50	50	24.0379	16.6667	24.0379	50	24.0379	16.6667	34.6675	24.0379	16.6667	16.6667	24.0379	16.6667	16.6667	16.6667	16.6667	50
34.6675	216.341	34.6675	72.1137	34.6675	34.6675	24.0379	24.0379	16.6667	216.341	16.6667	450	104.002	50	312.007	24.0379	16.6667	16.6667	34.6675	50	34.6675	50	24.0379	24.0379		50	24.0379	16.6667	50	34.6675	24.0379	24.0379	34.6675	34.6675	150	104.002	24.0379	24.0379	34.6675	50	104.002	24.0379	34.6675	16.6667	34.6675	150	16.6667	24.0379	16.6667
150	24.0379	104.002	50	34.6675	16.6667	34.6675	16.6667									216.341	16.6667	72.1137	16.6667	104.002	16.6667	312.007	16.6667		50	16.6667	24.0379	16.6667	150	34.6675	16.6667	34.6675									104.002	16.6667	50	24.0379	72.1137	24.0379	24.0379	24.0379
24.0379	72.1137	150	16.6667	16.6667	72.1137	16.6667	150									16.6667	104.002	34.6675	72.1137	34.6675	50	16.6667	34.6675		16.6667	24.0379	16.6667	72.1137	34.6675	16.6667	104.002	16.6667									16.6667	16.6667	24.0379	150	16.6667	16.6667	16.6667	72.1137
24.0379	34.6675	72.1137	50	72.1137	24.0379	24.0379	16.6667									24.0379	16.6667	24.0379	16.6667	16.6667	16.6667	34.6675	16.6667		24.0379	104.002	104.002	16.6667	16.6667	34.6675	24.0379	16.6667									24.0379	34.6675	34.6675	16.6667	34.6675	34.6675	16.6667	50
24.0379	104.002	16.6667	150	24.0379	16.6667	24.0379	50									50	50	50	104.002	34.6675	50	34.6675	104.002		16.6667	24.0379	16.6667	34.6675	24.0379	104.002	16.6667	50									16.6667	24.0379	16.6667	16.6667	24.0379	450	16.6667	24.0379
150	16.6667	312.007	34.6675	50	16.6667	150	34.6675									450	50	16.6667	16.6667	50	16.6667	72.1137	24.0379		104.002	24.0379	24.0379	24.0379	16.6667	24.0379	34.6675	16.6667									16.6667	34.6675	34.6675	34.6675	24.0379	72.1137	24.0379	24.0379
50	50	50	150	50	150	16.6667	24.0379									50	24.0379	34.6675	104.002	16.6667	34.6675	24.0379	216.341		50	16.6667	16.6667	34.6675	72.1137	50	312.007	104.002									50	72.1137	50	34.6675	16.6667	24.0379	16.6667	72.1137
[truncated: 24 more columns]

## Sheet: (b) Anchovy local conc, nM
216.341	16.6667	150	34.6675	24.0379	16.6667	50	450									50	16.6667	50	34.6675	16.6667	50	150	16.6667		104.002	104.002	50	50	450	16.6667	312.007	16.6667	24.0379	24.0379	72.1137	34.6675	16.6667	34.6675	216.341	50	16.6667	16.6667	16.6667	16.6667	50	16.6667	150	16.6667
16.6667	16.6667	16.6667	104.002	450	16.6667	34.6675	150									34.6675	16.6667	34.6675	34.6675	16.6667	16.6667	24.0379	312.007		16.6667	16.6667	24.0379	24.0379	34.6675	150	72.1137	50	24.0379	72.1137	104.002	24.0379	24.0379	72.1137	34.6675	34.6675	16.6667	50	150	72.1137	24.0379	50	216.341	104.002
104.002	50	16.6667	24.0379	24.0379	16.6667	24.0379	16.6667									34.6675	16.6667	150	50	16.6667	72.1137	34.6675	16.6667		16.6667	34.6675	104.002	34.6675	50	72.1137	72.1137	16.6667	34.6675	50	34.6675	24.0379	16.6667	16.6667	34.6675	24.0379	216.341	34.6675	34.6675	16.6667	16.6667	16.6667	16.6667	16.6667
50	16.6667	24.0379	16.6667	24.0379	16.6667	34.6675	24.0379									16.6667	24.0379	34.6675	16.6667	24.0379	34.6675	24.0379	312.007		34.6675	72.1137	24.0379	34.6675	16.6667	150	312.007	34.6675	34.6675	34.6675	34.6675	34.6675	34.6675	50	34.6675	16.6667	50	104.002	16.6667	16.6667	16.6667	16.6667	150	24.0379
216.341	24.0379	104.002	34.6675	16.6667	34.6675	104.002	16.6667									104.002	16.6667	50	24.0379	34.6675	16.6667	104.002	24.0379		104.002	16.6667	34.6675	24.0379	24.0379	16.6667	16.6667	24.0379	72.1137	24.0379	16.6667	16.6667	50	24.0379	104.002	24.0379	16.6667	450	16.6667	34.6675	16.6667	34.6675	34.6675	24.0379
34.6675	24.0379	72.1137	34.6675	150	50	104.002	24.0379									34.6675	150	312.007	16.6667	72.1137	16.6667	16.6667	72.1137		34.6675	104.002	16.6667	34.6675	24.0379	104.002	16.6667	34.6675	16.6667	34.6675	16.6667	72.1137	450	50	16.6667	34.6675	24.0379	216.341	16.6667	16.6667	16.6667	34.6675	72.1137	50
150	50	16.6667	24.0379	50	24.0379	16.6667	24.0379	72.1137	72.1137	24.0379	24.0379	150	16.6667	34.6675	216.341	24.0379	24.0379	50	34.6675	24.0379	24.0379	50	16.6667		50	24.0379	34.6675	24.0379	16.6667	24.0379	34.6675	16.6667	216.341	72.1137	16.6667	72.1137	50	16.6667	34.6675	24.0379	72.1137	50	50	50	24.0379	16.6667	50	24.0379
16.6667	72.1137	50	16.6667	16.6667	16.6667	24.0379	24.0379	34.6675	16.6667	24.0379	150	16.6667	16.6667	16.6667	16.6667	34.6675	34.6675	16.6667	16.6667	312.007	150	16.6667	216.341		16.6667	72.1137	24.0379	150	50	16.6667	72.1137	50	16.6667	50	24.0379	24.0379	50	16.6667	24.0379	24.0379	24.0379	150	16.6667	72.1137	34.6675	50	16.6667	50
34.6675	24.0379	24.0379	104.002	16.6667	50	16.6667	150	150	24.0379	50	50	24.0379	34.6675	24.0379	24.0379	16.6667	72.1137	16.6667	16.6667	16.6667	16.6667	24.0379	24.0379		104.002	34.6675	450	16.6667	312.007	24.0379	72.1137	34.6675									50	450	104.002	150	312.007	16.6667	312.007	34.6675
16.6667	34.6675	150	16.6667	450	16.6667	16.6667	24.0379	50	16.6667	24.0379	34.6675	72.1137	16.6667	16.6667	34.6675	34.6675	24.0379	24.0379	34.6675	16.6667	24.0379	16.6667	450		24.0379	24.0379	150	34.6675	24.0379	34.6675	34.6675	150									16.6667	312.007	216.341	450	450	50	34.6675	24.0379
104.002	216.341	16.6667	50	24.0379	24.0379	312.007	34.6675	16.6667	34.6675	72.1137	16.6667	24.0379	72.1137	72.1137	24.0379	150	16.6667	24.0379	24.0379	16.6667	16.6667	16.6667	50		16.6667	24.0379	34.6675	16.6667	16.6667	34.6675	72.1137	16.6667									72.1137	72.1137	50	50	216.341	16.6667	50	34.6675
24.0379	24.0379	16.6667	16.6667	16.6667	16.6667	50	16.6667	72.1137	24.0379	24.0379	16.6667	16.6667	50	34.6675	50	24.0379	312.007	24.0379	16.6667	16.6667	16.6667	16.6667	24.0379		16.6667	34.6675	16.6667	150	34.6675	50	24.0379	72.1137									24.0379	450	450	312.007	216.341	216.341	24.0379	50
24.0379	16.6667	24.0379	34.6675	34.6675	16.6667	16.6667	50	24.0379	34.6675	50	150	16.6667	16.6667	16.6667	34.6675	24.0379	16.6667	50	50	72.1137	72.1137	50	34.6675		150	16.6667	50	24.0379	50	72.1137	24.0379	24.0379	150	24.0379	24.0379	16.6667	72.1137	216.341	50	72.1137	16.6667	312.007	104.002	34.6675	72.1137	72.1137	34.6675	16.6667
34.6675	72.1137	450	24.0379	34.6675	16.6667	24.0379	150	16.6667	16.6667	24.0379	50	50	104.002	34.6675	34.6675	24.0379	16.6667	216.341	72.1137	72.1137	34.6675	16.6667	150		24.0379	104.002	50	50	24.0379	34.6675	16.6667	34.6675	50	16.6667	24.0379	16.6667	24.0379	34.6675	72.1137	216.341	16.6667	16.6667	104.002	72.1137	50	16.6667	34.6675	312.007
216.341	24.0379	16.6667	16.6667	50	72.1137	216.341	104.002	16.6667	24.0379	24.0379	24.0379	34.6675	34.6675	104.002	104.002	24.0379	24.0379	16.6667	16.6667	34.6675	16.6667	72.1137	16.6667		24.0379	16.6667	16.6667	16.6667	72.1137	50	50	16.6667	104.002	24.0379	72.1137	24.0379	72.1137	24.0379	150	216.341	50	24.0379	16.6667	104.002	216.341	34.6675	24.0379	50
16.6667	50	72.1137	16.6667	24.0379	16.6667	104.002	24.0379	16.6667	24.0379	216.341	24.0379	24.0379	50	34.6675	50	16.6667	16.6667	16.6667	16.6667	16.6667	34.6675	16.6667	104.002		16.6667	34.6675	16.6667	24.0379	34.6675	50	24.0379	50	34.6675	150	24.0379	50	16.6667	72.1137	72.1137	50	34.6675	24.0379	104.002	16.6667	16.6667	16.6667	16.6667	24.0379
34.6675	16.6667	24.0379	50	72.1137	24.0379	104.002	16.6667	24.0379	24.0379	34.6675	16.6667	50	24.0379	50	72.1137	16.6667	104.002	72.1137	24.0379	72.1137	450	16.6667	34.6675		104.002	34.6675	104.002	24.0379	16.6667	24.0379	16.6667	16.6667	50	16.6667	150	24.0379	34.6675	24.0379	72.1137	150	34.6675	34.6675	50	34.6675	104.002	24.0379	72.1137	24.0379
34.6675	104.002	16.6667	72.1137	24.0379	24.0379	450	34.6675	24.0379	16.6667	72.1137	16.6667	24.0379	104.002	72.1137	16.6667	34.6675	72.1137	24.0379	50	34.6675	34.6675	150	150		16.6667	104.002	16.6667	24.0379	50	34.6675	24.0379	24.0379	16.6667	216.341	24.0379	50	72.1137	34.6675	50	312.007	50	24.0379	450	104.002	16.6667	72.1137	16.6667	104.002
34.6675	24.0379	24.0379	16.6667	50	16.6667	24.0379	16.6667									24.0379	34.6675	24.0379	24.0379	34.6675	16.6667	24.0379	34.6675		16.6667	16.6667	16.6667	34.6675	312.007	16.6667	104.002	16.6667									312.007	72.1137	16.6667	16.6667	16.6667	16.6667	150	50
16.6667	16.6667	216.341	16.6667	24.0379	72.1137	450	34.6675									24.0379	72.1137	16.6667	16.6667	34.6675	16.6667	24.0379	50		34.6675	50	34.6675	16.6667	24.0379	24.0379	16.6667	16.6667									16.6667	72.1137	50	16.6667	24.0379	16.6667	450	150
50	72.1137	72.1137	24.0379	34.6675	34.6675	34.6675	72.1137									72.1137	24.0379	104.002	24.0379	16.6667	34.6675	16.6667	24.0379		216.341	16.6667	34.6675	34.6675	34.6675	24.0379	216.341	50									72.1137	34.6675	16.6667	16.6667	50	34.6675	16.6667	16.6667
16.6667	104.002	34.6675	16.6667	16.6667	16.6667	50	104.002									16.6667	34.6675	24.0379	72.1137	16.6667	16.6667	50	150		34.6675	50	24.0379	16.6667	24.0379	34.6675	104.002	150									50	16.6667	16.6667	50	34.6675	34.6675	24.0379	24.0379
16.6667	16.6667	216.341	34.6675	16.6667	24.0379	312.007	34.6675									34.6675	16.6667	150	16.6667	16.6667	34.6675	450	16.6667		312.007	72.1137	16.6667	50	104.002	16.6667	50	34.6675									16.6667	34.6675	150	50	24.0379	16.6667	72.1137	16.6667
34.6675	16.6667	24.0379	150	50	34.6675	50	24.0379									16.6667	24.0379	50	216.341	16.6667	34.6675	72.1137	216.341		34.6675	450	50	50	24.0379	34.6675	72.1137	216.341									16.6667	216.341	24.0379	216.341	72.1137	24.0379	16.6667	312.007
[truncated: 24 more columns]

## Sheet: (b) Mockingbird local conc, nM
72.1137	16.6667	16.6667	34.6675	50	16.6667	104.002	50									16.6667	16.6667	150	50	150	72.1137	50	34.6675		72.1137	16.6667	150	72.1137	72.1137	16.6667	16.6667	34.6675	34.6675	24.0379	16.6667	34.6675	24.0379	50	72.1137	34.6675	24.0379	16.6667	34.6675	34.6675	16.6667	16.6667	34.6675	34.6675
24.0379	34.6675	34.6675	16.6667	50	34.6675	50	50									24.0379	50	104.002	104.002	24.0379	16.6667	150	50		24.0379	16.6667	34.6675	450	16.6667	50	72.1137	16.6667	24.0379	50	50	16.6667	104.002	34.6675	104.002	24.0379	104.002	216.341	16.6667	50	72.1137	104.002	16.6667	16.6667
72.1137	216.341	216.341	16.6667	34.6675	72.1137	34.6675	16.6667									50	50	72.1137	16.6667	16.6667	16.6667	72.1137	24.0379		24.0379	104.002	16.6667	104.002	104.002	16.6667	72.1137	104.002	16.6667	16.6667	150	72.1137	24.0379	34.6675	16.6667	24.0379	72.1137	104.002	50	24.0379	34.6675	24.0379	34.6675	34.6675
150	34.6675	72.1137	34.6675	34.6675	16.6667	450	50									50	16.6667	16.6667	24.0379	216.341	150	34.6675	16.6667		24.0379	16.6667	72.1137	24.0379	16.6667	16.6667	50	216.341	450	16.6667	16.6667	16.6667	16.6667	216.341	104.002	16.6667	24.0379	16.6667	24.0379	34.6675	16.6667	24.0379	16.6667	50
72.1137	34.6675	24.0379	50	24.0379	150	16.6667	24.0379									16.6667	16.6667	104.002	104.002	50	24.0379	50	24.0379		16.6667	24.0379	24.0379	24.0379	16.6667	16.6667	16.6667	16.6667	104.002	16.6667	24.0379	24.0379	16.6667	34.6675	24.0379	34.6675	16.6667	72.1137	24.0379	50	24.0379	50	24.0379	312.007
24.0379	34.6675	16.6667	16.6667	16.6667	312.007	24.0379	50									216.341	72.1137	50	16.6667	50	16.6667	50	50		24.0379	24.0379	24.0379	16.6667	16.6667	24.0379	16.6667	24.0379	16.6667	24.0379	24.0379	450	16.6667	24.0379	50	104.002	34.6675	72.1137	34.6675	50	24.0379	16.6667	24.0379	216.341
104.002	72.1137	34.6675	312.007	150	16.6667	16.6667	24.0379	24.0379	16.6667	16.6667	216.341	72.1137	16.6667	50	16.6667	50	16.6667	24.0379	104.002	24.0379	216.341	72.1137	24.0379		104.002	150	16.6667	50	24.0379	34.6675	24.0379	50	72.1137	16.6667	34.6675	16.6667	16.6667	72.1137	50	16.6667	150	50	50	16.6667	34.6675	16.6667	104.002	34.6675
24.0379	24.0379	150	16.6667	24.0379	16.6667	104.002	24.0379	24.0379	216.341	50	16.6667	24.0379	16.6667	24.0379	150	150	24.0379	50	16.6667	16.6667	16.6667	24.0379	16.6667		34.6675	16.6667	312.007	16.6667	16.6667	50	16.6667	104.002	24.0379	24.0379	34.6675	216.341	312.007	24.0379	104.002	34.6675	34.6675	16.6667	34.6675	50	104.002	16.6667	24.0379	216.341
24.0379	24.0379	50	16.6667	16.6667	16.6667	24.0379	16.6667	16.6667	34.6675	16.6667	104.002	16.6667	104.002	24.0379	72.1137	24.0379	16.6667	24.0379	34.6675	312.007	50	24.0379	312.007		16.6667	104.002	16.6667	24.0379	16.6667	24.0379	16.6667	104.002									104.002	16.6667	24.0379	16.6667	34.6675	34.6675	16.6667	104.002
34.6675	50	16.6667	50	72.1137	16.6667	34.6675	16.6667	450	24.0379	16.6667	150	50	50	72.1137	72.1137	150	24.0379	34.6675	34.6675	16.6667	72.1137	24.0379	50		150	24.0379	16.6667	50	150	104.002	72.1137	50									72.1137	50	34.6675	16.6667	16.6667	16.6667	24.0379	16.6667
16.6667	16.6667	24.0379	24.0379	50	24.0379	16.6667	150	24.0379	216.341	24.0379	16.6667	50	16.6667	16.6667	16.6667	16.6667	34.6675	216.341	72.1137	50	104.002	16.6667	16.6667		50	24.0379	150	24.0379	34.6675	24.0379	16.6667	24.0379									312.007	72.1137	16.6667	16.6667	72.1137	24.0379	104.002	34.6675
312.007	24.0379	34.6675	34.6675	24.0379	34.6675	24.0379	34.6675	16.6667	24.0379	72.1137	16.6667	150	104.002	16.6667	34.6675	104.002	50	150	104.002	24.0379	34.6675	34.6675	50		16.6667	16.6667	150	16.6667	150	150	72.1137	50									216.341	72.1137	50	104.002	16.6667	34.6675	24.0379	150
16.6667	34.6675	72.1137	16.6667	16.6667	72.1137	34.6675	16.6667	16.6667	72.1137	16.6667	16.6667	16.6667	24.0379	34.6675	24.0379	16.6667	16.6667	16.6667	34.6675	24.0379	72.1137	16.6667	104.002		150	24.0379	16.6667	72.1137	16.6667	16.6667	24.0379	24.0379	16.6667	216.341	34.6675	16.6667	16.6667	16.6667	450	16.6667	24.0379	16.6667	16.6667	16.6667	24.0379	50	312.007	104.002
24.0379	16.6667	24.0379	216.341	104.002	72.1137	72.1137	104.002	24.0379	104.002	16.6667	16.6667	50	50	16.6667	34.6675	24.0379	16.6667	16.6667	216.341	16.6667	34.6675	34.6675	72.1137		312.007	72.1137	216.341	24.0379	104.002	16.6667	50	24.0379	104.002	104.002	16.6667	24.0379	72.1137	72.1137	16.6667	104.002	150	16.6667	16.6667	50	34.6675	24.0379	24.0379	24.0379
16.6667	34.6675	16.6667	50	34.6675	16.6667	16.6667	34.6675	24.0379	24.0379	16.6667	312.007	216.341	16.6667	24.0379	50	150	72.1137	16.6667	24.0379	150	34.6675	24.0379	50		34.6675	72.1137	16.6667	24.0379	16.6667	24.0379	24.0379	34.6675	16.6667	24.0379	24.0379	34.6675	16.6667	72.1137	16.6667	16.6667	16.6667	34.6675	16.6667	16.6667	34.6675	216.341	72.1137	34.6675
72.1137	72.1137	24.0379	24.0379	312.007	34.6675	16.6667	34.6675	72.1137	24.0379	34.6675	216.341	72.1137	16.6667	16.6667	150	16.6667	16.6667	24.0379	24.0379	24.0379	150	34.6675	16.6667		34.6675	50	72.1137	72.1137	50	24.0379	24.0379	150	16.6667	16.6667	104.002	216.341	72.1137	50	50	312.007	24.0379	24.0379	34.6675	24.0379	34.6675	24.0379	50	50
24.0379	24.0379	16.6667	104.002	16.6667	34.6675	16.6667	24.0379	34.6675	24.0379	34.6675	16.6667	72.1137	16.6667	50	72.1137	72.1137	34.6675	24.0379	72.1137	16.6667	16.6667	24.0379	104.002		312.007	16.6667	16.6667	72.1137	34.6675	16.6667	50	50	216.341	24.0379	16.6667	216.341	72.1137	24.0379	16.6667	16.6667	24.0379	150	450	104.002	16.6667	312.007	24.0379	16.6667
16.6667	16.6667	16.6667	72.1137	16.6667	16.6667	16.6667	216.341	104.002	16.6667	24.0379	104.002	16.6667	16.6667	16.6667	34.6675	24.0379	16.6667	72.1137	104.002	50	16.6667	16.6667	16.6667		24.0379	16.6667	50	16.6667	104.002	16.6667	34.6675	16.6667	16.6667	50	16.6667	72.1137	16.6667	34.6675	72.1137	34.6675	104.002	24.0379	16.6667	16.6667	24.0379	450	34.6675	16.6667
24.0379	312.007	24.0379	34.6675	16.6667	450	72.1137	104.002									16.6667	24.0379	216.341	24.0379	72.1137	72.1137	16.6667	216.341		16.6667	450	24.0379	104.002	50	24.0379	24.0379	16.6667									24.0379	16.6667	16.6667	34.6675	16.6667	24.0379	16.6667	16.6667
34.6675	16.6667	16.6667	150	72.1137	72.1137	16.6667	24.0379									216.341	24.0379	24.0379	16.6667	104.002	16.6667	34.6675	16.6667		216.341	16.6667	24.0379	16.6667	16.6667	24.0379	24.0379	24.0379									50	24.0379	104.002	16.6667	72.1137	34.6675	24.0379	72.1137
104.002	16.6667	16.6667	72.1137	104.002	50	16.6667	150									312.007	24.0379	16.6667	34.6675	16.6667	104.002	34.6675	34.6675		16.6667	16.6667	34.6675	50	72.1137	72.1137	16.6667	150									16.6667	104.002	16.6667	24.0379	104.002	150	34.6675	24.0379
34.6675	16.6667	104.002	16.6667	24.0379	50	104.002	16.6667									16.6667	150	216.341	16.6667	24.0379	50	104.002	16.6667		24.0379	16.6667	24.0379	50	216.341	16.6667	24.0379	104.002									150	34.6675	34.6675	24.0379	150	24.0379	34.6675	34.6675
72.1137	150	50	104.002	16.6667	24.0379	24.0379	34.6675									50	16.6667	16.6667	24.0379	16.6667	216.341	72.1137	24.0379		16.6667	16.6667	24.0379	150	24.0379	24.0379	16.6667	216.341									34.6675	104.002	16.6667	450	72.1137	16.6667	216.341	50
312.007	24.0379	34.6675	72.1137	72.1137	16.6667	312.007	34.6675									16.6667	34.6675	312.007	72.1137	24.0379	34.6675	16.6667	72.1137		312.007	72.1137	312.007	24.0379	24.0379	24.0379	16.6667	50									16.6667	50	24.0379	50	24.0379	34.6675	50	24.0379
[truncated: 24 more columns]

[truncated: 65 more sheets: (b) Hazelnuts local conc, nM, (b) Apples local conc, nM, (b) Magnolia local conc, nM, (b) Harom local conc, nM, (b) Aon local conc, nM, (b) Mbili local conc, nM, (b) LetterH local conc, nM, (b) LetterA local conc, nM, (b) LetterM local conc, nM, (b) NoisyApple1 local conc, nM, (b) NoisyApple2 local conc, nM, (b) NoisyApple3 local conc, nM, (b) NoisyHorse1 local conc, nM, (b) NoisyHorse2 local conc, nM, (b) NoisyHorse3 local conc, nM, (b) ObscMagn1 local conc, nM, (b) ObscMagn2 local conc, nM, (b) ObscMagn3 local conc, nM, (b) ObscHazeln1 local conc, nM, (b) ObscHazeln2 local conc, nM …]
